# Supplementary material for: Impact of Rare Non-coding Variants on Human Diseases through Alternative Polyadenylation Outliers
Source: Research Square preprint supplement (doi:10.21203/rs.3.rs-3907149/v1), 2024-03-07
Supplement: Supplementary file 1 [file da3b7442576674d68fb2be8f.xlsx]

## Sheet: Table S1
Supplementary Table 1. Rare single-nucleotide variants (SNVs) with Combined Annotation-Dependent Depletion (CADD) scores ≥ 15 nearby aOutlier genes.
# Chromosome: the chromosome where the RV was detected.
# Position: genomic coordinate of RV based on human genome build GRCh38.
# Reference_allele: the genotype for the reference allele.
# Alternative_allele: the genotype for the alternative allele.
# Gene: Gene name.
# CADD: Deleteriousness score of genetic variants, the Phred score of this model was used in this table.
# aOutlier_type: either "3'UTR" denoting the aberrant APA event occurred in the 3'UTR of the gene or "Intronic" indicating the aberrant APA event occurred in the intron of the gene.
Chromosome	Position	Reference_allele	Alternative_allele	Gene	CADD	aOutlier_type
chr1	109401890	C	T	PSMA5	20.8	3'UTR
chr1	109736993	T	C	GSTM3	15.29	3'UTR
chr1	112674603	G	A	MOV10	22.4	3'UTR
chr1	112701149	A	C	MOV10	21.2	3'UTR
chr1	153561364	T	C	S100A2	15.7	3'UTR
chr1	153561532	G	A	S100A2	18.01	3'UTR
chr1	232986481	G	A	NTPCR	22.3	3'UTR
chr1	32770882	G	A	YARS1	17.21	3'UTR
chr1	32775257	A	G	YARS1	21.3	3'UTR
chr1	34070043	G	A	CSMD2	18.14	3'UTR
chr1	34089002	G	C	CSMD2	24	3'UTR
chr1	34092341	C	T	CSMD2	15.67	3'UTR
chr1	34145093	C	A	CSMD2	16.45	3'UTR
chr1	39881295	T	C	TRIT1	15.88	3'UTR
chr1	54032310	A	C	TMEM59	22.7	3'UTR
chr1	92184700	A	G	KIAA1107	21.7	3'UTR
chr1	94218586	A	G	ARHGAP29	21.4	3'UTR
chr1	99694356	A	C	PALMD	21.4	3'UTR
chr10	4998719	A	C	AKR1C2	25.8	3'UTR
chr10	69400994	C	T	TACR2	20.5	3'UTR
chr10	69401215	G	T	TACR2	15.91	3'UTR
chr10	69404839	T	C	TACR2	15.41	3'UTR
chr10	69407291	A	G	TACR2	18.38	3'UTR
chr10	86985281	T	C	AGAP11	15.24	3'UTR
chr10	93658960	A	C	FRA10AC1	16.94	3'UTR
chr11	131395347	T	A	NTM	20.8	3'UTR
chr11	44245440	A	T	EXT2	19.41	3'UTR
chr12	121308371	T	C	ANAPC5	15.11	3'UTR
chr12	50538271	G	A	DIP2B	17.11	3'UTR
chr12	62593257	A	C	MON2	18.03	3'UTR
chr14	57274845	G	C	AP5M1	23.7	3'UTR
chr14	58234775	A	G	ACTR10	16.05	3'UTR
chr14	72539933	G	T	RGS6	16.83	3'UTR
chr14	74469903	A	C	NPC2	19.28	3'UTR
chr14	74480701	C	T	NPC2	21.5	3'UTR
chr14	75009020	T	G	EIF2B2	21.9	3'UTR
chr14	76058679	G	A	IFT43	17.06	3'UTR
chr15	40854418	C	T	SPINT1	21.8	3'UTR
chr15	43861373	C	T	FRMD5	20.9	3'UTR
chr15	78280523	G	A	DNAJA4	20.3	3'UTR
chr16	2110309	C	T	PKD1	15.72	3'UTR
chr16	23482922	C	A	GGA2	25.1	3'UTR
chr16	3664437	C	T	DNASE1	27.2	3'UTR
chr16	50106367	T	C	HEATR3	16.01	3'UTR
chr16	69466672	G	A	CYB5B	16.16	3'UTR
chr16	85676181	A	C	GSE1	22	3'UTR
chr17	18347507	T	C	SHMT1	26	3'UTR
chr17	49780180	G	A	KAT7	16.11	3'UTR
chr17	81900237	T	C	ANAPC11	15.8	3'UTR
chr17	82273438	T	C	CSNK1D	16.28	3'UTR
chr18	49853648	C	T	SNHG22	27	3'UTR
chr18	9239608	C	T	ANKRD12	17.35	3'UTR
chr18	9712609	G	C	RAB31	19.63	3'UTR
chr19	12954187	T	G	GADD45GIP1	17.75	3'UTR
chr19	19276533	T	G	SUGP1	18.37	3'UTR
chr19	35879739	T	G	NFKBID	15.75	3'UTR
chr19	49491821	A	G	RPL13A	22.3	3'UTR
chr19	54576061	C	T	LILRA2	17.64	3'UTR
chr19	54587228	A	G	LILRA2	22.7	3'UTR
chr19	55182101	C	T	SYT5	23.3	3'UTR
chr2	117832360	A	G	DDX18	17.46	3'UTR
chr2	171966171	C	G	SLC25A12	18.48	3'UTR
chr2	18105209	C	G	KCNS3	15.68	3'UTR
chr2	192021403	A	G	TMEFF2	15.9	3'UTR
chr2	241755984	G	A	D2HGDH	22	3'UTR
chr2	38581501	G	C	HNRNPLL	19.35	3'UTR
chr2	74215226	G	C	MTHFD2	16.71	3'UTR
chr2	86137468	G	C	PTCD3	24.2	3'UTR
chr20	50510406	G	A	PTPN1	20.4	3'UTR
chr20	50581694	C	T	PTPN1	20.6	3'UTR
chr20	59028710	T	C	ATP5F1E	19.9	3'UTR
chr21	46243663	G	A	MCM3AP-AS1	17.29	3'UTR
chr22	23178633	T	A	BCR	15.88	3'UTR
chr22	23315933	A	G	BCR	17.57	3'UTR
chr22	50092073	T	C	MLC1	21.6	3'UTR
chr3	12897234	T	C	IQSEC1	20.8	3'UTR
chr3	129478141	C	T	IFT122	26.4	3'UTR
chr3	129485862	A	G	IFT122	17.43	3'UTR
chr3	141926180	T	G	ATP1B3	15.33	3'UTR
chr3	4492807	G	C	ITPR1	15.5	3'UTR
chr3	4847486	A	G	ITPR1	21.7	3'UTR
chr4	57031340	T	C	IGFBP7	15.76	3'UTR
chr5	134402697	A	T	CDKN2AIPNL	19.88	3'UTR
chr5	176811972	G	A	UNC5A	15.38	3'UTR
chr5	38453690	C	T	EGFLAM	15	3'UTR
chr5	40936439	T	C	C7	25.1	3'UTR
chr5	77424053	A	G	WDR41	15.22	3'UTR
chr5	77485921	G	A	WDR41	19.85	3'UTR
chr5	77582401	A	G	WDR41	16.63	3'UTR
chr6	83194555	A	G	PGM3	18.63	3'UTR
chr6	99437370	G	T	USP45	35	3'UTR
chr7	103103446	C	T	ARMC10	18.33	3'UTR
chr7	25613626	T	C	LOC646588	15.92	3'UTR
chr7	56063382	T	C	CCT6A	16.26	3'UTR
chr7	76579393	A	G	LOC100133091	17.52	3'UTR
chr7	76611560	A	T	LOC100133091	21.1	3'UTR
chr1	113829592	C	G	PTPN22	28.1	Intronic
chr1	117954098	A	T	WDR3	25.3	Intronic
chr1	203722694	G	C	ATP2B4	18.11	Intronic
chr1	228374013	G	A	OBSCN	23.5	Intronic
chr1	23816675	C	T	HMGCL	21.3	Intronic
chr1	54068898	G	T	TCEANC2	33	Intronic
chr1	92624174	A	G	EVI5	33	Intronic
chr10	124706631	C	G	FAM53B	20.7	Intronic
chr10	18551822	C	T	NSUN6	24.5	Intronic
chr10	50090816	G	A	WASHC2A	23.2	Intronic
chr10	93310020	C	T	MYOF	19.3	Intronic
chr10	98445297	T	C	HPS1	17.49	Intronic
chr11	3104188	C	T	OSBPL5	15.27	Intronic
chr11	36081779	G	C	LDLRAD3	35	Intronic
chr11	36081782	A	C	LDLRAD3	21.3	Intronic
chr11	65884392	C	G	FIBP	24.8	Intronic
chr12	120446828	A	T	GATC	48	Intronic
chr12	124334423	C	T	NCOR2	26.6	Intronic
chr12	7102090	G	C	C1RL	16.72	Intronic
chr12	95137522	C	T	FGD6	21.8	Intronic
chr13	110424998	G	A	COL4A2	34	Intronic
chr13	110458935	G	A	COL4A2	25.8	Intronic
chr13	39727549	G	A	COG6	34	Intronic
chr13	75327751	C	A	TBC1D4	25.6	Intronic
chr14	24329061	C	T	ADCY4	22.4	Intronic
chr14	24337097	G	A	ADCY4	36	Intronic
chr14	74734171	G	A	FCF1	34	Intronic
chr14	76082697	G	A	IFT43	22.9	Intronic
chr14	91972715	A	G	TRIP11	28	Intronic
chr15	28113071	C	T	HERC2	19.9	Intronic
chr15	65119371	C	G	PDCD7	21.2	Intronic
chr15	75360129	T	C	MAN2C1	17.44	Intronic
chr15	75364190	T	C	MAN2C1	24.3	Intronic
chr15	78077288	C	T	TBC1D2B	21.6	Intronic
chr15	80180230	G	A	FAH	21.3	Intronic
chr16	17134473	C	T	XYLT1	29.3	Intronic
chr16	18529498	T	C	NOMO2	22.9	Intronic
chr16	18529568	A	G	NOMO2	22.4	Intronic
chr16	31371789	G	A	ITGAX	19.69	Intronic
chr16	55819533	A	C	CES1	25.4	Intronic
chr16	69319548	G	A	VPS4A	23	Intronic
chr16	74691276	C	T	MLKL	23.3	Intronic
chr16	74719161	C	T	FA2H	26.2	Intronic
chr16	8641128	C	G	METTL22	17	Intronic
chr17	64098119	A	G	ERN1	33	Intronic
chr18	77066298	C	T	MBP	23.3	Intronic
chr19	1117322	C	G	SBNO2	26.5	Intronic
chr19	4099201	C	T	MAP2K2	23	Intronic
chr19	7624296	C	T	XAB2	21.9	Intronic
chr2	101151126	C	T	TBC1D8	33	Intronic
chr2	110211623	C	T	MTLN	22.6	Intronic
chr2	151366217	G	A	TNFAIP6	21.5	Intronic
chr2	190659998	A	G	NAB1	21.8	Intronic
chr2	206771291	G	A	FASTKD2	32	Intronic
chr2	232672444	G	A	EFHD1	34	Intronic
chr2	26775675	A	G	SLC35F6	18.04	Intronic
chr2	27660984	C	T	SUPT7L	26.1	Intronic
chr2	38806554	C	T	DHX57	22.8	Intronic
chr2	85357256	A	C	ELMOD3	19.42	Intronic
chr20	41493535	T	C	CHD6	21.1	Intronic
chr21	32361892	C	T	URB1	25.3	Intronic
chr22	19915213	C	G	TXNRD2	25	Intronic
chr22	50432330	G	A	PPP6R2	34	Intronic
chr3	136327733	G	T	PCCB	34	Intronic
chr3	49310619	C	T	USP4	29.1	Intronic
chr4	112547284	C	G	ZGRF1	26.3	Intronic
chr4	39638733	A	C	SMIM14	23.7	Intronic
chr4	8222975	G	A	SH3TC1	18.17	Intronic
chr5	38904505	T	C	OSMR	25.2	Intronic
chr5	41149933	A	G	C6	27.2	Intronic
chr6	108074245	C	T	OSTM1	22.5	Intronic
chr6	129441003	G	C	LAMA2	22.1	Intronic
chr6	13620488	A	G	NOL7	22.9	Intronic
chr6	75151862	C	T	COL12A1	19.3	Intronic
chr7	140674264	G	C	ADCK2	29.6	Intronic
chr7	1474706	T	C	INTS1	25.3	Intronic
chr7	149731774	C	G	KRBA1	23.3	Intronic
chr7	158764675	A	T	ESYT2	27.9	Intronic
chr8	119416970	G	A	CCN3	35	Intronic
chr8	22561160	C	T	SORBS3	15.85	Intronic
chr8	47966412	G	A	MCM4	20.8	Intronic
chr8	58601286	T	G	NSMAF	26.5	Intronic
chr8	97931524	T	C	MATN2	29.1	Intronic

## Sheet: Table S2
Supplementary Table 2. aOutlier genes with nearby rare indels in the outlier individuals.
# aOutlier_Gene: gene/transcript for wich at least one individual presents aberrant APA comparing to other individuals across tissues.
# Individual: aOutlier individual, indicated by GTEx individual ID
# Chromosome: chromosome of the indels being detected
# Position: genomic coordinate of the indel, based on human genome build GRCh38.
# Annotation: genomic annotation of the indels, by VEP v104
aOutlier_Gene	Individual	Chromosome	Position	Annotation
NM_000026.4|ADSL|chr22|+	GTEX-12C56	chr22	40393791	intron_variant
NM_000442.5|PECAM1|chr17|-	GTEX-QESD	chr17	64322222	3_prime_UTR_variant
NM_000587.4|C7|chr5|+	GTEX-14C39	chr5	40942647	intron_variant
NM_000748.3|CHRNB2|chr1|+	GTEX-1C64N	chr1	154579343	splice_region_variant
NM_000849.5|GSTM3|chr1|-	GTEX-WRHK	chr1	109732214	non_coding_transcript_exon_variant
NM_000849.5|GSTM3|chr1|-	GTEX-WRHK	chr1	109732219	non_coding_transcript_exon_variant
NM_001001342.2|NA|chr10|-	GTEX-QDVN	chr10	100271692	upstream_gene_variant
NM_001023567.5|GOLGA8B|chr15|-	GTEX-1A8FM	chr15	34588888	upstream_gene_variant
NM_001031710.3|KLHL7|chr7|+	GTEX-17GQL	chr7	23124415	intron_variant
NM_001031710.3|KLHL7|chr7|+	GTEX-17GQL	chr7	23168954	intron_variant
NM_001031710.3|KLHL7|chr7|+	GTEX-QVUS	chr7	23124415	intron_variant
NM_001031710.3|KLHL7|chr7|+	GTEX-QVUS	chr7	23168954	intron_variant
NM_001033044.4|GLUL|chr1|-	GTEX-18465	chr1	182389797	non_coding_transcript_exon_variant
NM_001033056.3|GLUL|chr1|-	GTEX-18465	chr1	182389797	non_coding_transcript_exon_variant
NM_001057.3|NA|chr10|-	GTEX-131XF	chr10	69411840	intron_variant
NM_001057.3|NA|chr10|-	GTEX-131XF	chr10	69411840	intron_variant
NM_001057.3|NA|chr10|-	GTEX-131XF	chr10	69411840	intron_variant
NM_001057.3|NA|chr10|-	GTEX-131XF	chr10	69411840	intron_variant
NM_001057.3|NA|chr10|-	GTEX-131XF	chr10	69414819	intron_variant
NM_001080436.2|WTIP|chr19|+	GTEX-17MF6	chr19	34485929	intron_variant
NM_001085372.3|UQCC3|chr11|+	GTEX-1AMFI	chr11	62676515	3_prime_UTR_variant
NM_001098815.3|TESPA1|chr12|-	GTEX-PVOW	chr12	54980957	intron_variant
NM_001099668.1|HIGD1A|chr3|-	GTEX-1477Z	chr3	42784315	3_prime_UTR_variant
NM_001103148.2|GIGYF2|chr2|+	GTEX-1NV5F	chr2	232699083	intron_variant
NM_001112732.3|MCF2L|chr13|+	GTEX-NPJ8	chr13	112943255	intron_variant
NM_001128159.3|VPS53|chr17|-	GTEX-13S86	chr17	711242	intron_variant
NM_001128211.1|NUDCD1|chr8|-	GTEX-12KS4	chr8	109242679	3_prime_UTR_variant
NM_001128211.1|NUDCD1|chr8|-	GTEX-15SHV	chr8	109242679	3_prime_UTR_variant
NM_001128211.1|NUDCD1|chr8|-	GTEX-QEG5	chr8	109242679	3_prime_UTR_variant
NM_001130012.3|SLC9A3R2|chr16|+	GTEX-R55D	chr16	2016930	intron_variant
NM_001144888.2|BAIAP2|chr17|+	GTEX-S95S	chr17	81088069	intron_variant
NM_001144888.2|BAIAP2|chr17|+	GTEX-S95S	chr17	81116191	3_prime_UTR_variant
NM_001145437.1|LSS|chr21|-	GTEX-1C6VR	chr21	46189146	3_prime_UTR_variant
NM_001145437.1|LSS|chr21|-	GTEX-1C6VR	chr21	46230306	non_coding_transcript_exon_variant
NM_001145437.1|LSS|chr21|-	GTEX-P4QT	chr21	46189146	3_prime_UTR_variant
NM_001145437.1|LSS|chr21|-	GTEX-P4QT	chr21	46230306	non_coding_transcript_exon_variant
NM_001161012.3|ARMC10|chr7|+	GTEX-11EI6	chr7	103081710	intron_variant
NM_001161012.3|ARMC10|chr7|+	GTEX-11EI6	chr7	103085158	intron_variant
NM_001161012.3|ARMC10|chr7|+	GTEX-11EI6	chr7	103091694	intron_variant
NM_001161012.3|ARMC10|chr7|+	GTEX-11EI6	chr7	103092993	intron_variant
NM_001161012.3|ARMC10|chr7|+	GTEX-11EI6	chr7	103094962	intron_variant
NM_001161012.3|ARMC10|chr7|+	GTEX-11EI6	chr7	103095557	intron_variant
NM_001161012.3|ARMC10|chr7|+	GTEX-131XF	chr7	103081710	intron_variant
NM_001161012.3|ARMC10|chr7|+	GTEX-131XF	chr7	103085158	intron_variant
NM_001161012.3|ARMC10|chr7|+	GTEX-131XF	chr7	103091694	intron_variant
NM_001161012.3|ARMC10|chr7|+	GTEX-131XF	chr7	103092993	intron_variant
NM_001161012.3|ARMC10|chr7|+	GTEX-131XF	chr7	103094962	intron_variant
NM_001161012.3|ARMC10|chr7|+	GTEX-131XF	chr7	103095557	intron_variant
NM_001161012.3|ARMC10|chr7|+	GTEX-14LZ3	chr7	103081710	intron_variant
NM_001161012.3|ARMC10|chr7|+	GTEX-14LZ3	chr7	103085158	intron_variant
NM_001161012.3|ARMC10|chr7|+	GTEX-14LZ3	chr7	103091694	intron_variant
NM_001161012.3|ARMC10|chr7|+	GTEX-14LZ3	chr7	103092993	intron_variant
NM_001161012.3|ARMC10|chr7|+	GTEX-14LZ3	chr7	103094962	intron_variant
NM_001161012.3|ARMC10|chr7|+	GTEX-14LZ3	chr7	103095557	intron_variant
NM_001161012.3|ARMC10|chr7|+	GTEX-15SHU	chr7	103081710	intron_variant
NM_001161012.3|ARMC10|chr7|+	GTEX-15SHU	chr7	103085158	intron_variant
NM_001161012.3|ARMC10|chr7|+	GTEX-15SHU	chr7	103091694	intron_variant
NM_001161012.3|ARMC10|chr7|+	GTEX-15SHU	chr7	103092993	intron_variant
NM_001161012.3|ARMC10|chr7|+	GTEX-15SHU	chr7	103094690	intron_variant
NM_001161012.3|ARMC10|chr7|+	GTEX-15SHU	chr7	103094962	intron_variant
NM_001161012.3|ARMC10|chr7|+	GTEX-15SHU	chr7	103095557	intron_variant
NM_001161012.3|ARMC10|chr7|+	GTEX-15SHU	chr7	103096087	non_coding_transcript_exon_variant
NM_001161012.3|ARMC10|chr7|+	GTEX-17EUY	chr7	103085158	intron_variant
NM_001161012.3|ARMC10|chr7|+	GTEX-17EUY	chr7	103091694	intron_variant
NM_001161012.3|ARMC10|chr7|+	GTEX-17EUY	chr7	103092993	intron_variant
NM_001161012.3|ARMC10|chr7|+	GTEX-17EUY	chr7	103094962	intron_variant
NM_001161012.3|ARMC10|chr7|+	GTEX-17EUY	chr7	103095557	intron_variant
NM_001161012.3|ARMC10|chr7|+	GTEX-17EUY	chr7	103107770	intron_variant
NM_001161012.3|ARMC10|chr7|+	GTEX-1F6RS	chr7	103081710	intron_variant
NM_001161012.3|ARMC10|chr7|+	GTEX-1F6RS	chr7	103085158	intron_variant
NM_001161012.3|ARMC10|chr7|+	GTEX-1F6RS	chr7	103091694	intron_variant
NM_001161012.3|ARMC10|chr7|+	GTEX-1F6RS	chr7	103092993	intron_variant
NM_001161012.3|ARMC10|chr7|+	GTEX-1F6RS	chr7	103094962	intron_variant
NM_001161012.3|ARMC10|chr7|+	GTEX-1F6RS	chr7	103095557	intron_variant
NM_001161013.2|ARMC10|chr7|+	GTEX-11EI6	chr7	103081710	intron_variant
NM_001161013.2|ARMC10|chr7|+	GTEX-11EI6	chr7	103085158	intron_variant
NM_001161013.2|ARMC10|chr7|+	GTEX-11EI6	chr7	103091694	intron_variant
NM_001161013.2|ARMC10|chr7|+	GTEX-11EI6	chr7	103092993	intron_variant
NM_001161013.2|ARMC10|chr7|+	GTEX-11EI6	chr7	103094962	intron_variant
NM_001161013.2|ARMC10|chr7|+	GTEX-11EI6	chr7	103095557	intron_variant
NM_001161013.2|ARMC10|chr7|+	GTEX-131XF	chr7	103081710	intron_variant
NM_001161013.2|ARMC10|chr7|+	GTEX-131XF	chr7	103085158	intron_variant
NM_001161013.2|ARMC10|chr7|+	GTEX-131XF	chr7	103091694	intron_variant
NM_001161013.2|ARMC10|chr7|+	GTEX-131XF	chr7	103092993	intron_variant
NM_001161013.2|ARMC10|chr7|+	GTEX-131XF	chr7	103094962	intron_variant
NM_001161013.2|ARMC10|chr7|+	GTEX-131XF	chr7	103095557	intron_variant
NM_001161013.2|ARMC10|chr7|+	GTEX-14LZ3	chr7	103081710	intron_variant
NM_001161013.2|ARMC10|chr7|+	GTEX-14LZ3	chr7	103085158	intron_variant
NM_001161013.2|ARMC10|chr7|+	GTEX-14LZ3	chr7	103091694	intron_variant
NM_001161013.2|ARMC10|chr7|+	GTEX-14LZ3	chr7	103092993	intron_variant
NM_001161013.2|ARMC10|chr7|+	GTEX-14LZ3	chr7	103094962	intron_variant
NM_001161013.2|ARMC10|chr7|+	GTEX-14LZ3	chr7	103095557	intron_variant
NM_001161013.2|ARMC10|chr7|+	GTEX-15SHU	chr7	103081710	intron_variant
NM_001161013.2|ARMC10|chr7|+	GTEX-15SHU	chr7	103085158	intron_variant
NM_001161013.2|ARMC10|chr7|+	GTEX-15SHU	chr7	103091694	intron_variant
NM_001161013.2|ARMC10|chr7|+	GTEX-15SHU	chr7	103092993	intron_variant
NM_001161013.2|ARMC10|chr7|+	GTEX-15SHU	chr7	103094690	intron_variant
NM_001161013.2|ARMC10|chr7|+	GTEX-15SHU	chr7	103094962	intron_variant
NM_001161013.2|ARMC10|chr7|+	GTEX-15SHU	chr7	103095557	intron_variant
NM_001161013.2|ARMC10|chr7|+	GTEX-15SHU	chr7	103096087	non_coding_transcript_exon_variant
NM_001161013.2|ARMC10|chr7|+	GTEX-17EUY	chr7	103085158	intron_variant
NM_001161013.2|ARMC10|chr7|+	GTEX-17EUY	chr7	103091694	intron_variant
NM_001161013.2|ARMC10|chr7|+	GTEX-17EUY	chr7	103092993	intron_variant
NM_001161013.2|ARMC10|chr7|+	GTEX-17EUY	chr7	103094962	intron_variant
NM_001161013.2|ARMC10|chr7|+	GTEX-17EUY	chr7	103095557	intron_variant
NM_001161013.2|ARMC10|chr7|+	GTEX-17EUY	chr7	103107770	intron_variant
NM_001161013.2|ARMC10|chr7|+	GTEX-1F6RS	chr7	103081710	intron_variant
NM_001161013.2|ARMC10|chr7|+	GTEX-1F6RS	chr7	103085158	intron_variant
NM_001161013.2|ARMC10|chr7|+	GTEX-1F6RS	chr7	103091694	intron_variant
NM_001161013.2|ARMC10|chr7|+	GTEX-1F6RS	chr7	103092993	intron_variant
NM_001161013.2|ARMC10|chr7|+	GTEX-1F6RS	chr7	103094962	intron_variant
NM_001161013.2|ARMC10|chr7|+	GTEX-1F6RS	chr7	103095557	intron_variant
NM_001164246.1|ODR4|chr1|+	GTEX-11UD2	chr1	186421348	3_prime_UTR_variant
NM_001164246.1|ODR4|chr1|+	GTEX-1GZ4I	chr1	186421348	3_prime_UTR_variant
NM_001171905.1|NUDT16|chr3|+	GTEX-1IDJE	chr3	131387421	3_prime_UTR_variant
NM_001171905.1|NUDT16|chr3|+	GTEX-1IDJE	chr3	131392599	downstream_gene_variant
NM_001171905.1|NUDT16|chr3|+	GTEX-1S3DN	chr3	131377366	intron_variant
NM_001171905.1|NUDT16|chr3|+	GTEX-1S3DN	chr3	131387421	3_prime_UTR_variant
NM_001171905.1|NUDT16|chr3|+	GTEX-1S3DN	chr3	131392599	downstream_gene_variant
NM_001171905.1|NUDT16|chr3|+	GTEX-PLZ6	chr3	131377366	intron_variant
NM_001171905.1|NUDT16|chr3|+	GTEX-PLZ6	chr3	131387421	3_prime_UTR_variant
NM_001171905.1|NUDT16|chr3|+	GTEX-PLZ6	chr3	131392599	downstream_gene_variant
NM_001191003.1|NA|chr10|+	GTEX-1LC47	chr10	104255130	5_prime_UTR_variant
NM_001205315.2|STEAP4|chr7|-	GTEX-11DXX	chr7	88296547	intron_variant
NM_001205317.2|RIMS4|chr20|-	GTEX-X4XY	chr20	44788801	intron_variant
NM_001243279.3|ACSF3|chr16|+	GTEX-11NSD	chr16	89154565	3_prime_UTR_variant
NM_001243279.3|ACSF3|chr16|+	GTEX-1GN1U	chr16	89154565	3_prime_UTR_variant
NM_001243279.3|ACSF3|chr16|+	GTEX-1NV8Z	chr16	89124344	intron_variant
NM_001243279.3|ACSF3|chr16|+	GTEX-1NV8Z	chr16	89154565	3_prime_UTR_variant
NM_001253389.1|ISYNA1|chr19|-	GTEX-1CB4G	chr19	18434392	3_prime_UTR_variant
NM_001256702.1|USP3|chr15|+	GTEX-1B8KZ	chr15	63521583	intron_variant
NM_001278471.2|MON2|chr12|+	GTEX-T6MO	chr12	62480470	intron_variant
NM_001281432.2|ZNHIT3|chr17|+	GTEX-11ZTS	chr17	36499065	splice_region_variant
NM_001281956.1|CSMD2|chr1|-	GTEX-131XW	chr1	33593303	intron_variant
NM_001281956.1|CSMD2|chr1|-	GTEX-131XW	chr1	34035058	intron_variant
NM_001281956.1|CSMD2|chr1|-	GTEX-131XW	chr1	34038553	intron_variant
NM_001281956.1|CSMD2|chr1|-	GTEX-131XW	chr1	34040408	intron_variant
NM_001281956.1|CSMD2|chr1|-	GTEX-131XW	chr1	34040408	intron_variant
NM_001281956.1|CSMD2|chr1|-	GTEX-131XW	chr1	34087987	intron_variant
NM_001281956.1|CSMD2|chr1|-	GTEX-131XW	chr1	34103474	intron_variant
NM_001281956.1|CSMD2|chr1|-	GTEX-131XW	chr1	34127232	intron_variant
NM_001282439.1|NA|chr10|-	GTEX-QDVN	chr10	100271692	upstream_gene_variant
NM_001283049.2|USP8|chr15|+	GTEX-1MJK3	chr15	50499649	3_prime_UTR_variant
NM_001284316.2|ACSF3|chr16|+	GTEX-11NSD	chr16	89154565	3_prime_UTR_variant
NM_001284316.2|ACSF3|chr16|+	GTEX-1GN1U	chr16	89154565	3_prime_UTR_variant
NM_001284316.2|ACSF3|chr16|+	GTEX-1NV8Z	chr16	89124344	intron_variant
NM_001284316.2|ACSF3|chr16|+	GTEX-1NV8Z	chr16	89154565	3_prime_UTR_variant
NM_001287142.1|TPD52|chr8|-	GTEX-1O97I	chr8	80158326	intron_variant
NM_001287142.1|TPD52|chr8|-	GTEX-1O97I	chr8	80223340	intron_variant
NM_001287144.2|TPD52|chr8|-	GTEX-1O97I	chr8	80158326	intron_variant
NM_001287144.2|TPD52|chr8|-	GTEX-1O97I	chr8	80223340	intron_variant
NM_001287810.4|CYFIP1|chr15|-	GTEX-17HII	chr15	22869446	3_prime_UTR_variant
NM_001288715.1|CTNND2|chr5|-	GTEX-1PWST	chr5	11155019	intron_variant
NM_001288715.1|CTNND2|chr5|-	GTEX-1PWST	chr5	11634270	intron_variant
NM_001288715.1|CTNND2|chr5|-	GTEX-1PWST	chr5	11853791	intron_variant
NM_001289111.1|RPF2|chr6|+	GTEX-1LVAM	chr6	111031968	downstream_gene_variant
NM_001290271.2|LILRA2|chr19|+	GTEX-17KNJ	chr19	54575938	frameshift_variant
NM_001290271.2|LILRA2|chr19|+	GTEX-17KNJ	chr19	54576477	intron_variant
NM_001290271.2|LILRA2|chr19|+	GTEX-17KNJ	chr19	54577348	intron_variant
NM_001290271.2|LILRA2|chr19|+	GTEX-17KNJ	chr19	54577376	intron_variant
NM_001290271.2|LILRA2|chr19|+	GTEX-17KNJ	chr19	54577477	frameshift_variant
NM_001290271.2|LILRA2|chr19|+	GTEX-17KNJ	chr19	54586608	intron_variant
NM_001290271.2|LILRA2|chr19|+	GTEX-17KNJ	chr19	54586621	intron_variant
NM_001290271.2|LILRA2|chr19|+	GTEX-17KNJ	chr19	54586659	intron_variant
NM_001290271.2|LILRA2|chr19|+	GTEX-17KNJ	chr19	54586663	intron_variant
NM_001290271.2|LILRA2|chr19|+	GTEX-17KNJ	chr19	54586875	intron_variant
NM_001290271.2|LILRA2|chr19|+	GTEX-17KNJ	chr19	54587353	3_prime_UTR_variant
NM_001290271.2|LILRA2|chr19|+	GTEX-17KNJ	chr19	54587787	3_prime_UTR_variant
NM_001290271.2|LILRA2|chr19|+	GTEX-17KNJ	chr19	54588030	3_prime_UTR_variant
NM_001290271.2|LILRA2|chr19|+	GTEX-17KNJ	chr19	54589762	3_prime_UTR_variant
NM_001290271.2|LILRA2|chr19|+	GTEX-17KNJ	chr19	54589789	3_prime_UTR_variant
NM_001290271.2|LILRA2|chr19|+	GTEX-17KNJ	chr19	54589790	3_prime_UTR_variant
NM_001290271.2|LILRA2|chr19|+	GTEX-17KNJ	chr19	54589792	3_prime_UTR_variant
NM_001301849.2|SGSM3|chr22|+	GTEX-145MH	chr22	40410281	3_prime_UTR_variant
NM_001308020.2|PIK3C3|chr18|+	GTEX-1A3MW	chr18	42081380	3_prime_UTR_variant
NM_001318737.3|CCDC82|chr11|-	GTEX-Y8E4	chr11	96345763	upstream_gene_variant
NM_001318939.2|EEF1AKMT1|chr13|-	GTEX-XAJ8	chr13	20758725	intron_variant
NM_001319043.1|EIF2A|chr3|+	GTEX-1LSNM	chr3	150582481	intron_variant
NM_001323423.2|RBM39|chr20|-	GTEX-YJ89	chr20	35703626	3_prime_UTR_variant
NM_001329846.2|MYT1L|chr2|-	GTEX-X4XY	chr2	1976944	intron_variant
NM_001329846.2|MYT1L|chr2|-	GTEX-X4XY	chr2	2011321	intron_variant
NM_001329852.2|MYT1L|chr2|-	GTEX-14753	chr2	2145810	intron_variant
NM_001329852.2|MYT1L|chr2|-	GTEX-14753	chr2	2312447	intron_variant
NM_001332.4|CTNND2|chr5|-	GTEX-1PWST	chr5	11155019	intron_variant
NM_001332.4|CTNND2|chr5|-	GTEX-1PWST	chr5	11634270	intron_variant
NM_001332.4|CTNND2|chr5|-	GTEX-1PWST	chr5	11853791	intron_variant
NM_001346006.2|IGFLR1|chr19|-	GTEX-13U4I	chr19	35738218	intron_variant
NM_001346006.2|IGFLR1|chr19|-	GTEX-15EOM	chr19	35738218	intron_variant
NM_001346006.2|IGFLR1|chr19|-	GTEX-ZV6S	chr19	35738218	intron_variant
NM_001346033.1|USP45|chr6|-	GTEX-17F9Y	chr6	99434119	3_prime_UTR_variant
NM_001348663.2|TMEM255B|chr13|+	GTEX-17MF6	chr13	113751072	non_coding_transcript_exon_variant
NM_001350335.1|CFAP298|chr21|-	GTEX-13RTL	chr21	32603260	frameshift_variant
NM_001351148.1|TESPA1|chr12|-	GTEX-PVOW	chr12	54980957	intron_variant
NM_001351303.1|ZDHHC11B|chr5|-	GTEX-S32W	chr5	701463	intergenic_variant
NM_001352054.2|EML2|chr19|-	GTEX-13CF2	chr19	45654502	downstream_gene_variant
NM_001352659.1|PCM1|chr8|+	GTEX-13PDP	chr8	17948118	intron_variant
NM_001364128.1|CTNND2|chr5|-	GTEX-1PWST	chr5	11155019	intron_variant
NM_001364128.1|CTNND2|chr5|-	GTEX-1PWST	chr5	11634270	intron_variant
NM_001364128.1|CTNND2|chr5|-	GTEX-1PWST	chr5	11853791	intron_variant
NM_001364603.1|PDE4D|chr5|-	GTEX-13FTZ	chr5	60273573	intron_variant
NM_001366904.1|TSNARE1|chr8|-	GTEX-1QW4Y	chr8	142318949	intron_variant
NM_001366904.1|TSNARE1|chr8|-	GTEX-1QW4Y	chr8	142318949	intron_variant
NM_001370345.1|HMCES|chr3|+	GTEX-WK11	chr3	129291403	intron_variant
NM_001371245.1|PDIA4|chr7|-	GTEX-145MO	chr7	149003431	3_prime_UTR_variant
NM_001371245.1|PDIA4|chr7|-	GTEX-145MO	chr7	149003436	3_prime_UTR_variant
NM_001371301.1|DYRK4|chr12|+	GTEX-QVJO	chr12	4613909	3_prime_UTR_variant
NM_001424.6|EMP2|chr16|-	GTEX-13RTK	chr16	10570905	intron_variant
NM_002340.6|LSS|chr21|-	GTEX-1C6VR	chr21	46189146	3_prime_UTR_variant
NM_002340.6|LSS|chr21|-	GTEX-1C6VR	chr21	46230306	non_coding_transcript_exon_variant
NM_002340.6|LSS|chr21|-	GTEX-P4QT	chr21	46189146	3_prime_UTR_variant
NM_002340.6|LSS|chr21|-	GTEX-P4QT	chr21	46230306	non_coding_transcript_exon_variant
NM_002790.4|PSMA5|chr1|-	GTEX-17EUY	chr1	109408501	intron_variant
NM_002790.4|PSMA5|chr1|-	GTEX-17EUY	chr1	109424945	intron_variant
NM_002827.4|PTPN1|chr20|+	GTEX-11TTK	chr20	50569511	intron_variant
NM_002827.4|PTPN1|chr20|+	GTEX-11TTK	chr20	50569511	intron_variant
NM_002827.4|PTPN1|chr20|+	GTEX-13OVH	chr20	50569511	intron_variant
NM_002827.4|PTPN1|chr20|+	GTEX-13OVH	chr20	50569511	intron_variant
NM_002827.4|PTPN1|chr20|+	GTEX-1A8G6	chr20	50569511	intron_variant
NM_002827.4|PTPN1|chr20|+	GTEX-1A8G6	chr20	50569511	intron_variant
NM_002827.4|PTPN1|chr20|+	GTEX-1CAMR	chr20	50569511	intron_variant
NM_002827.4|PTPN1|chr20|+	GTEX-1CAMR	chr20	50569511	intron_variant
NM_002827.4|PTPN1|chr20|+	GTEX-1QP2A	chr20	50569511	intron_variant
NM_002827.4|PTPN1|chr20|+	GTEX-1QP2A	chr20	50569511	intron_variant
NM_003215.3|TEC|chr4|-	GTEX-13FTW	chr4	48211424	intron_variant
NM_003904.5|NA|chr11|-	GTEX-17MF6	chr11	116767053	intron_variant
NM_004161.5|RAB1A|chr2|-	GTEX-15DCE	chr2	65087927	3_prime_UTR_variant
NM_004514.4|FOXK2|chr17|+	GTEX-1399Q	chr17	82522128	intron_variant
NM_004599.4|SREBF2|chr22|+	GTEX-RUSQ	chr22	41905860	3_prime_UTR_variant
NM_004599.4|SREBF2|chr22|+	GTEX-RUSQ	chr22	41905864	3_prime_UTR_variant
NM_004599.4|SREBF2|chr22|+	GTEX-RUSQ	chr22	41905868	3_prime_UTR_variant
NM_004599.4|SREBF2|chr22|+	GTEX-RUSQ	chr22	41905871	3_prime_UTR_variant
NM_004599.4|SREBF2|chr22|+	GTEX-RUSQ	chr22	41905875	3_prime_UTR_variant
NM_004599.4|SREBF2|chr22|+	GTEX-RUSQ	chr22	41905887	3_prime_UTR_variant
NM_004599.4|SREBF2|chr22|+	GTEX-RUSQ	chr22	41905899	3_prime_UTR_variant
NM_004599.4|SREBF2|chr22|+	GTEX-RUSQ	chr22	41905906	3_prime_UTR_variant
NM_004599.4|SREBF2|chr22|+	GTEX-RUSQ	chr22	41911228	frameshift_variant
NM_004785.6|SLC9A3R2|chr16|+	GTEX-R55D	chr16	2016930	intron_variant
NM_004832.3|NA|chr10|+	GTEX-1LC47	chr10	104255130	5_prime_UTR_variant
NM_004911.5|PDIA4|chr7|-	GTEX-145MO	chr7	149003431	3_prime_UTR_variant
NM_004911.5|PDIA4|chr7|-	GTEX-145MO	chr7	149003436	3_prime_UTR_variant
NM_006537.4|USP3|chr15|+	GTEX-1B8KZ	chr15	63521583	intron_variant
NM_006636.4|MTHFD2|chr2|+	GTEX-15SHU	chr2	74190274	intron_variant
NM_007013.4|WWP1|chr8|+	GTEX-1R9PN	chr8	86462411	intron_variant
NM_012334.3|MYO10|chr5|-	GTEX-13S86	chr5	16912052	intron_variant
NM_012334.3|MYO10|chr5|-	GTEX-13S86	chr5	16912052	intron_variant
NM_012334.3|MYO10|chr5|-	GTEX-13S86	chr5	16912052	intron_variant
NM_012334.3|MYO10|chr5|-	GTEX-13S86	chr5	16912052	intron_variant
NM_012430.5|SEC22A|chr3|+	GTEX-S33H	chr3	123280137	upstream_gene_variant
NM_013402.7|FADS1|chr11|-	GTEX-Y8E4	chr11	61799643	3_prime_UTR_variant
NM_013402.7|FADS1|chr11|-	GTEX-Y8E4	chr11	61834935	intron_variant
NM_014454.3|SESN1|chr6|-	GTEX-131XF	chr6	108986455	3_prime_UTR_variant
NM_014521.3|SH3BP4|chr2|+	GTEX-OHPM	chr2	235020681	intron_variant
NM_015235.3|NA|chr10|-	GTEX-QVJO	chr10	51697270	3_prime_UTR_variant
NM_015492.5|C15orf39|chr15|+	GTEX-16MTA	chr15	75208267	inframe_deletion
NM_015492.5|C15orf39|chr15|+	GTEX-16MTA	chr15	75208267	inframe_insertion
NM_015641.4|TES|chr7|+	GTEX-1IDJC	chr7	116258759	3_prime_UTR_variant
NM_016551.3|TM7SF3|chr12|-	GTEX-1GMRU	chr12	26978086	frameshift_variant
NM_017457.5|CYTH2|chr19|+	GTEX-13N2G	chr19	48490605	intron_variant
NM_017646.6|TRIT1|chr1|-	GTEX-RTLS	chr1	39841066	3_prime_UTR_variant
NM_018268.4|WDR41|chr5|-	GTEX-12WSG	chr5	77479494	intron_variant
NM_018268.4|WDR41|chr5|-	GTEX-15EO6	chr5	77431117	3_prime_UTR_variant
NM_018268.4|WDR41|chr5|-	GTEX-1IDJF	chr5	77526125	intron_variant
NM_018268.4|WDR41|chr5|-	GTEX-QVUS	chr5	77471466	intron_variant
NM_018268.4|WDR41|chr5|-	GTEX-QVUS	chr5	77594312	intron_variant
NM_018268.4|WDR41|chr5|-	GTEX-V955	chr5	77431117	3_prime_UTR_variant
NM_018370.3|DRAM1|chr12|+	GTEX-1GF9V	chr12	101982163	intron_variant
NM_018848.3|MKKS|chr20|-	GTEX-1314G	chr20	10411654	intron_variant
NM_021574.3|BCR|chr22|+	GTEX-OXRK	chr22	23196417	intron_variant
NM_024979.4|MCF2L|chr13|+	GTEX-NPJ8	chr13	112943255	intron_variant
NM_052864.3|TIFA|chr4|-	GTEX-1A8FM	chr4	112288289	intron_variant
NM_133259.4|LRPPRC|chr2|-	GTEX-13OVL	chr2	43955404	intron_variant
NM_133259.4|LRPPRC|chr2|-	GTEX-13OVL	chr2	43981855	intron_variant
NM_133369.3|UNC5A|chr5|+	GTEX-14753	chr5	176854100	intron_variant
NM_139062.4|CSNK1D|chr17|-	GTEX-PWO3	chr17	82235236	splice_region_variant
NM_139062.4|CSNK1D|chr17|-	GTEX-PWO3	chr17	82235240	5_prime_UTR_variant
NM_139062.4|CSNK1D|chr17|-	GTEX-PWO3	chr17	82237094	non_coding_transcript_exon_variant
NM_139062.4|CSNK1D|chr17|-	GTEX-PWO3	chr17	82257660	intron_variant
NM_148918.2|SHMT1|chr17|-	GTEX-146FR	chr17	18327889	3_prime_UTR_variant
NM_152395.3|NUDT16|chr3|+	GTEX-1S3DN	chr3	131377366	intron_variant
NM_152395.3|NUDT16|chr3|+	GTEX-1S3DN	chr3	131387421	3_prime_UTR_variant
NM_152395.3|NUDT16|chr3|+	GTEX-1S3DN	chr3	131392599	downstream_gene_variant
NM_152395.3|NUDT16|chr3|+	GTEX-PLZ6	chr3	131377366	intron_variant
NM_152395.3|NUDT16|chr3|+	GTEX-PLZ6	chr3	131387421	3_prime_UTR_variant
NM_152395.3|NUDT16|chr3|+	GTEX-PLZ6	chr3	131392599	downstream_gene_variant
NM_152851.2|MS4A6A|chr11|-	GTEX-145MF	chr11	60193054	intron_variant
NM_173809.5|NA|chr10|-	GTEX-QDVN	chr10	100271692	upstream_gene_variant
NM_174858.3|AK5|chr1|+	GTEX-12WSA	chr1	77548711	intron_variant
NM_175062.4|RASGEF1C|chr5|-	GTEX-QDT8	chr5	180117571	intron_variant
NM_182935.4|MOBP|chr3|+	GTEX-1CB4J	chr3	39459076	intergenic_variant
NR_002909.2|SNHG3|chr1|+	GTEX-17F9Y	chr1	28515592	intron_variant
NR_024537.1|GSTM3|chr1|-	GTEX-WRHK	chr1	109732214	non_coding_transcript_exon_variant
NR_024537.1|GSTM3|chr1|-	GTEX-WRHK	chr1	109732219	non_coding_transcript_exon_variant
NR_027168.2|SNHG29|chr17|+	GTEX-13RTL	chr17	16432993	intron_variant
NR_027168.2|SNHG29|chr17|+	GTEX-13RTL	chr17	16435140	intron_variant
NR_027168.2|SNHG29|chr17|+	GTEX-13RTL	chr17	16457644	intron_variant
NR_027168.2|SNHG29|chr17|+	GTEX-13RTL	chr17	16459421	intron_variant
NR_027410.1|GOLGA8B|chr15|-	GTEX-1A8FM	chr15	34588888	upstream_gene_variant
NR_029411.1|LOC100133091|chr7|+	GTEX-U3ZH	chr7	76550271	intron_variant
NR_029411.1|LOC100133091|chr7|+	GTEX-U3ZH	chr7	76555801	intron_variant
NR_029411.1|LOC100133091|chr7|+	GTEX-U3ZH	chr7	76561674	intron_variant
NR_029411.1|LOC100133091|chr7|+	GTEX-U3ZH	chr7	76582210	intron_variant
NR_029411.1|LOC100133091|chr7|+	GTEX-U3ZH	chr7	76587450	intron_variant
NR_029411.1|LOC100133091|chr7|+	GTEX-U3ZH	chr7	76592633	intron_variant
NR_029411.1|LOC100133091|chr7|+	GTEX-U3ZH	chr7	76594245	intron_variant
NR_029411.1|LOC100133091|chr7|+	GTEX-U3ZH	chr7	76596941	intron_variant
NR_029411.1|LOC100133091|chr7|+	GTEX-U3ZH	chr7	76608793	intron_variant
NR_034072.1|SARS1|chr1|+	GTEX-1I4MK	chr1	109224120	intron_variant
NR_045667.2|ACSF3|chr16|+	GTEX-11NSD	chr16	89154565	3_prime_UTR_variant
NR_045667.2|ACSF3|chr16|+	GTEX-1GN1U	chr16	89154565	3_prime_UTR_variant
NR_045667.2|ACSF3|chr16|+	GTEX-1NV8Z	chr16	89124344	intron_variant
NR_045667.2|ACSF3|chr16|+	GTEX-1NV8Z	chr16	89154565	3_prime_UTR_variant
NR_072977.2|MKKS|chr20|-	GTEX-1314G	chr20	10411654	intron_variant
NR_110566.1|MCM3AP-AS1|chr21|+	GTEX-11ZUS	chr21	46241020	splice_donor_variant
NR_110566.1|MCM3AP-AS1|chr21|+	GTEX-NPJ8	chr21	46230643	intron_variant
NR_110566.1|MCM3AP-AS1|chr21|+	GTEX-ZPCL	chr21	46241020	splice_donor_variant
NR_110567.1|MCM3AP-AS1|chr21|+	GTEX-11ZUS	chr21	46241020	splice_donor_variant
NR_110567.1|MCM3AP-AS1|chr21|+	GTEX-NPJ8	chr21	46230643	intron_variant
NR_110567.1|MCM3AP-AS1|chr21|+	GTEX-ZPCL	chr21	46241020	splice_donor_variant
NR_110578.2|CSNK1D|chr17|-	GTEX-PWO3	chr17	82235236	splice_region_variant
NR_110578.2|CSNK1D|chr17|-	GTEX-PWO3	chr17	82235240	5_prime_UTR_variant
NR_110578.2|CSNK1D|chr17|-	GTEX-PWO3	chr17	82237094	non_coding_transcript_exon_variant
NR_110578.2|CSNK1D|chr17|-	GTEX-PWO3	chr17	82257660	intron_variant
XM_005249873.2|ZMIZ2|chr7|+	GTEX-13PDP	chr7	44753873	intron_variant
XM_005250258.1|TES|chr7|+	GTEX-1IDJC	chr7	116258759	3_prime_UTR_variant
XM_005250760.4|WWP1|chr8|+	GTEX-1R9PN	chr8	86462411	intron_variant
XM_005255702.4|SLC9A3R2|chr16|+	GTEX-R55D	chr16	2016930	intron_variant
XM_005267015.2|SNX9|chr6|+	GTEX-OIZI	chr6	157698180	upstream_gene_variant
XM_005267015.2|SNX9|chr6|+	GTEX-OIZI	chr6	157862334	intron_variant
XM_005269005.2|DRAM1|chr12|+	GTEX-1GF9V	chr12	101982163	intron_variant
XM_005270739.5|AK5|chr1|+	GTEX-12WSA	chr1	77548711	intron_variant
XM_005272460.3|ZNF358|chr19|+	GTEX-NL4W	chr19	7509095	intron_variant
XM_006714928.1|UNC5A|chr5|+	GTEX-14753	chr5	176854100	intron_variant
XM_006720761.3|USP8|chr15|+	GTEX-1MJK3	chr15	50499649	3_prime_UTR_variant
XM_006722653.3|C19orf25|chr19|-	GTEX-13S86	chr19	1472601	3_prime_UTR_variant
XM_011509661.2|ODR4|chr1|+	GTEX-11UD2	chr1	186421348	3_prime_UTR_variant
XM_011509661.2|ODR4|chr1|+	GTEX-1GZ4I	chr1	186421348	3_prime_UTR_variant
XM_011510328.2|MYT1L|chr2|-	GTEX-X4XY	chr2	1976944	intron_variant
XM_011510328.2|MYT1L|chr2|-	GTEX-X4XY	chr2	2011321	intron_variant
XM_011510594.3|FAM168B|chr2|-	GTEX-1399Q	chr2	131049508	3_prime_UTR_variant
XM_011510594.3|FAM168B|chr2|-	GTEX-1399Q	chr2	131050130	3_prime_UTR_variant
XM_011510594.3|FAM168B|chr2|-	GTEX-1399Q	chr2	131077847	intron_variant
XM_011511996.2|CUL3|chr2|-	GTEX-1MA7X	chr2	224584286	intron_variant
XM_011516918.1|TSNARE1|chr8|-	GTEX-1QW4Y	chr8	142318949	intron_variant
XM_011516918.1|TSNARE1|chr8|-	GTEX-1QW4Y	chr8	142318949	intron_variant
XM_011526701.2|EML2|chr19|-	GTEX-13CF2	chr19	45654502	downstream_gene_variant
XM_011527668.1|CIRBP|chr19|+	GTEX-1B996	chr19	1267818	non_coding_transcript_exon_variant
XM_011530347.2|SREBF2|chr22|+	GTEX-RUSQ	chr22	41905860	3_prime_UTR_variant
XM_011530347.2|SREBF2|chr22|+	GTEX-RUSQ	chr22	41905864	3_prime_UTR_variant
XM_011530347.2|SREBF2|chr22|+	GTEX-RUSQ	chr22	41905868	3_prime_UTR_variant
XM_011530347.2|SREBF2|chr22|+	GTEX-RUSQ	chr22	41905871	3_prime_UTR_variant
XM_011530347.2|SREBF2|chr22|+	GTEX-RUSQ	chr22	41905875	3_prime_UTR_variant
XM_011530347.2|SREBF2|chr22|+	GTEX-RUSQ	chr22	41905887	3_prime_UTR_variant
XM_011530347.2|SREBF2|chr22|+	GTEX-RUSQ	chr22	41905899	3_prime_UTR_variant
XM_011530347.2|SREBF2|chr22|+	GTEX-RUSQ	chr22	41905906	3_prime_UTR_variant
XM_011530347.2|SREBF2|chr22|+	GTEX-RUSQ	chr22	41911228	frameshift_variant
XM_011534861.1|LHFPL6|chr13|-	GTEX-1LVAM	chr13	39508423	intron_variant
XM_011536940.3|AP5M1|chr14|+	GTEX-131XF	chr14	57271671	intron_variant
XM_011536940.3|AP5M1|chr14|+	GTEX-131XF	chr14	57303836	intergenic_variant
XM_011536940.3|AP5M1|chr14|+	GTEX-131XF	chr14	57306576	intergenic_variant
XM_011539035.2|TESPA1|chr12|-	GTEX-PVOW	chr12	54980957	intron_variant
XM_011542348.1|YARS1|chr1|-	GTEX-1OKEX	chr1	32774082	3_prime_UTR_variant
XM_011543505.2|WDR41|chr5|-	GTEX-12WSG	chr5	77479494	intron_variant
XM_011543505.2|WDR41|chr5|-	GTEX-15EO6	chr5	77431117	3_prime_UTR_variant
XM_011543505.2|WDR41|chr5|-	GTEX-1IDJF	chr5	77526125	intron_variant
XM_011543505.2|WDR41|chr5|-	GTEX-QVUS	chr5	77471466	intron_variant
XM_011543505.2|WDR41|chr5|-	GTEX-QVUS	chr5	77594312	intron_variant
XM_011543505.2|WDR41|chr5|-	GTEX-V955	chr5	77431117	3_prime_UTR_variant
XM_011545044.2|NA|chr11|+	GTEX-13W46	chr11	77215808	downstream_gene_variant
XM_011545044.2|NA|chr11|+	GTEX-13W46	chr11	77215808	downstream_gene_variant
XM_011545781.1|FUS|chr16|+	GTEX-WHPG	chr16	31187441	non_coding_transcript_exon_variant
XM_017000978.1|DNM3|chr1|+	GTEX-1A8G7	chr1	172046039	intron_variant
XM_017002651.2|YARS1|chr1|-	GTEX-1OKEX	chr1	32774082	3_prime_UTR_variant
XM_017004318.1|YPEL5|chr2|+	GTEX-SN8G	chr2	30159530	3_prime_UTR_variant
XM_017004318.1|YPEL5|chr2|+	GTEX-SN8G	chr2	30159530	3_prime_UTR_variant
XM_017004318.1|YPEL5|chr2|+	GTEX-SN8G	chr2	30159530	3_prime_UTR_variant
XM_017004318.1|YPEL5|chr2|+	GTEX-SN8G	chr2	30159530	3_prime_UTR_variant
XM_017004617.2|CTDSP1|chr2|+	GTEX-15CHC	chr2	218399326	intron_variant
XM_017004617.2|CTDSP1|chr2|+	GTEX-1RLM8	chr2	218401271	non_coding_transcript_exon_variant
XM_017008476.1|RNF150|chr4|-	GTEX-1GZ4I	chr4	141086201	intron_variant
XM_017010116.2|ZDHHC11B|chr5|-	GTEX-S32W	chr5	701463	intergenic_variant
XM_017011886.1|HECW1|chr7|+	GTEX-PVOW	chr7	43124858	intron_variant
XM_017012158.2|CASTOR3|chr7|-	GTEX-UPK5	chr7	100213358	intron_variant
XM_017012685.2|ARMC10|chr7|+	GTEX-11EI6	chr7	103081710	intron_variant
XM_017012685.2|ARMC10|chr7|+	GTEX-11EI6	chr7	103085158	intron_variant
XM_017012685.2|ARMC10|chr7|+	GTEX-11EI6	chr7	103091694	intron_variant
XM_017012685.2|ARMC10|chr7|+	GTEX-11EI6	chr7	103092993	intron_variant
XM_017012685.2|ARMC10|chr7|+	GTEX-11EI6	chr7	103094962	intron_variant
XM_017012685.2|ARMC10|chr7|+	GTEX-11EI6	chr7	103095557	intron_variant
XM_017012685.2|ARMC10|chr7|+	GTEX-131XF	chr7	103081710	intron_variant
XM_017012685.2|ARMC10|chr7|+	GTEX-131XF	chr7	103085158	intron_variant
XM_017012685.2|ARMC10|chr7|+	GTEX-131XF	chr7	103091694	intron_variant
XM_017012685.2|ARMC10|chr7|+	GTEX-131XF	chr7	103092993	intron_variant
XM_017012685.2|ARMC10|chr7|+	GTEX-131XF	chr7	103094962	intron_variant
XM_017012685.2|ARMC10|chr7|+	GTEX-131XF	chr7	103095557	intron_variant
XM_017012685.2|ARMC10|chr7|+	GTEX-14LZ3	chr7	103081710	intron_variant
XM_017012685.2|ARMC10|chr7|+	GTEX-14LZ3	chr7	103085158	intron_variant
XM_017012685.2|ARMC10|chr7|+	GTEX-14LZ3	chr7	103091694	intron_variant
XM_017012685.2|ARMC10|chr7|+	GTEX-14LZ3	chr7	103092993	intron_variant
XM_017012685.2|ARMC10|chr7|+	GTEX-14LZ3	chr7	103094962	intron_variant
XM_017012685.2|ARMC10|chr7|+	GTEX-14LZ3	chr7	103095557	intron_variant
XM_017012685.2|ARMC10|chr7|+	GTEX-15SHU	chr7	103081710	intron_variant
XM_017012685.2|ARMC10|chr7|+	GTEX-15SHU	chr7	103085158	intron_variant
XM_017012685.2|ARMC10|chr7|+	GTEX-15SHU	chr7	103091694	intron_variant
XM_017012685.2|ARMC10|chr7|+	GTEX-15SHU	chr7	103092993	intron_variant
XM_017012685.2|ARMC10|chr7|+	GTEX-15SHU	chr7	103094690	intron_variant
XM_017012685.2|ARMC10|chr7|+	GTEX-15SHU	chr7	103094962	intron_variant
XM_017012685.2|ARMC10|chr7|+	GTEX-15SHU	chr7	103095557	intron_variant
XM_017012685.2|ARMC10|chr7|+	GTEX-15SHU	chr7	103096087	non_coding_transcript_exon_variant
XM_017012685.2|ARMC10|chr7|+	GTEX-17EUY	chr7	103085158	intron_variant
XM_017012685.2|ARMC10|chr7|+	GTEX-17EUY	chr7	103091694	intron_variant
XM_017012685.2|ARMC10|chr7|+	GTEX-17EUY	chr7	103092993	intron_variant
XM_017012685.2|ARMC10|chr7|+	GTEX-17EUY	chr7	103094962	intron_variant
XM_017012685.2|ARMC10|chr7|+	GTEX-17EUY	chr7	103095557	intron_variant
XM_017012685.2|ARMC10|chr7|+	GTEX-17EUY	chr7	103107770	intron_variant
XM_017012685.2|ARMC10|chr7|+	GTEX-1F6RS	chr7	103081710	intron_variant
XM_017012685.2|ARMC10|chr7|+	GTEX-1F6RS	chr7	103085158	intron_variant
XM_017012685.2|ARMC10|chr7|+	GTEX-1F6RS	chr7	103091694	intron_variant
XM_017012685.2|ARMC10|chr7|+	GTEX-1F6RS	chr7	103092993	intron_variant
XM_017012685.2|ARMC10|chr7|+	GTEX-1F6RS	chr7	103094962	intron_variant
XM_017012685.2|ARMC10|chr7|+	GTEX-1F6RS	chr7	103095557	intron_variant
XM_017012801.2|FOXP2|chr7|+	GTEX-1LVAM	chr7	114638838	intron_variant
XM_017012994.2|WWP1|chr8|+	GTEX-1R9PN	chr8	86462411	intron_variant
XM_017013911.1|NUDCD1|chr8|-	GTEX-12KS4	chr8	109242679	3_prime_UTR_variant
XM_017013911.1|NUDCD1|chr8|-	GTEX-15SHV	chr8	109242679	3_prime_UTR_variant
XM_017013911.1|NUDCD1|chr8|-	GTEX-QEG5	chr8	109242679	3_prime_UTR_variant
XM_017016877.1|NA|chr10|+	GTEX-14JIY	chr10	91968364	intron_variant
XM_017017781.1|NA|chr11|+	GTEX-13W46	chr11	77215808	downstream_gene_variant
XM_017017781.1|NA|chr11|+	GTEX-13W46	chr11	77215808	downstream_gene_variant
XM_017019042.1|MON2|chr12|+	GTEX-T6MO	chr12	62480470	intron_variant
XM_017020348.2|N4BP2L2|chr13|-	GTEX-11EM3	chr13	32457168	intron_variant
XM_017020560.1|TMEM255B|chr13|+	GTEX-17MF6	chr13	113751072	non_coding_transcript_exon_variant
XM_017022777.2|LOC105376722|chr15|+	GTEX-1K2DU	chr15	84400985	intron_variant
XM_017023020.2|ACSF3|chr16|+	GTEX-11NSD	chr16	89154565	3_prime_UTR_variant
XM_017023020.2|ACSF3|chr16|+	GTEX-1GN1U	chr16	89154565	3_prime_UTR_variant
XM_017023020.2|ACSF3|chr16|+	GTEX-1NV8Z	chr16	89124344	intron_variant
XM_017023020.2|ACSF3|chr16|+	GTEX-1NV8Z	chr16	89154565	3_prime_UTR_variant
XM_017024957.1|SHMT1|chr17|-	GTEX-146FR	chr17	18327889	3_prime_UTR_variant
XM_017024958.1|SHMT1|chr17|-	GTEX-146FR	chr17	18327889	3_prime_UTR_variant
XM_017028147.1|RBM39|chr20|-	GTEX-YJ89	chr20	35703626	3_prime_UTR_variant
XM_024446215.1|ZDHHC11|chr5|-	GTEX-1C2JI	chr5	797794	intron_variant
XM_024446215.1|ZDHHC11|chr5|-	GTEX-1C2JI	chr5	850658	5_prime_UTR_variant
XM_024448899.1|ANKLE2|chr12|-	GTEX-1PPH7	chr12	132727141	3_prime_UTR_variant
XM_024449286.1|TESPA1|chr12|-	GTEX-PVOW	chr12	54980957	intron_variant
XM_024449761.1|RGS6|chr14|+	GTEX-17MF6	chr14	72239153	intron_variant
XM_024450600.1|RBFOX3|chr17|-	GTEX-TSE9	chr17	79127554	intron_variant
XM_024450600.1|RBFOX3|chr17|-	GTEX-TSE9	chr17	79212354	intron_variant
XM_024450603.1|RBFOX3|chr17|-	GTEX-TSE9	chr17	79127554	intron_variant
XM_024450603.1|RBFOX3|chr17|-	GTEX-TSE9	chr17	79212354	intron_variant
XM_024450887.1|SHMT1|chr17|-	GTEX-146FR	chr17	18327889	3_prime_UTR_variant
XM_024451063.1|PLCH2|chr1|+	GTEX-QVJO	chr1	2489150	intron_variant
XM_024452022.1|RBM39|chr20|-	GTEX-YJ89	chr20	35703626	3_prime_UTR_variant
XM_024452024.1|RBM39|chr20|-	GTEX-YJ89	chr20	35703626	3_prime_UTR_variant
XR_001745464.2|WWP1|chr8|+	GTEX-1R9PN	chr8	86462411	intron_variant
XR_001748627.1|MON2|chr12|+	GTEX-1B8KZ	chr12	62480470	intron_variant
XR_001748627.1|MON2|chr12|+	GTEX-T6MO	chr12	62480470	intron_variant
XR_002957961.1|CSNK1D|chr17|-	GTEX-PWO3	chr17	82235236	splice_region_variant
XR_002957961.1|CSNK1D|chr17|-	GTEX-PWO3	chr17	82235240	5_prime_UTR_variant
XR_002957961.1|CSNK1D|chr17|-	GTEX-PWO3	chr17	82237094	non_coding_transcript_exon_variant
XR_002957961.1|CSNK1D|chr17|-	GTEX-PWO3	chr17	82257660	intron_variant
XR_002958192.1|LOC105372098|chr18|-	GTEX-1N2EF	chr18	47079161	intron_variant
XR_002958896.1|LRPPRC|chr2|-	GTEX-13OVL	chr2	43955404	intron_variant
XR_002958896.1|LRPPRC|chr2|-	GTEX-13OVL	chr2	43981855	intron_variant
XR_002959285.1|DUSP28|chr2|+	GTEX-12ZZX	chr2	240556536	intron_variant
XR_002959285.1|DUSP28|chr2|+	GTEX-12ZZX	chr2	240562111	3_prime_UTR_variant
XR_002959291.1|CSMD2|chr1|-	GTEX-131XW	chr1	33593303	intron_variant
XR_002959291.1|CSMD2|chr1|-	GTEX-131XW	chr1	34035058	intron_variant
XR_002959291.1|CSMD2|chr1|-	GTEX-131XW	chr1	34038553	intron_variant
XR_002959291.1|CSMD2|chr1|-	GTEX-131XW	chr1	34040408	intron_variant
XR_002959291.1|CSMD2|chr1|-	GTEX-131XW	chr1	34040408	intron_variant
XR_002959291.1|CSMD2|chr1|-	GTEX-131XW	chr1	34087987	intron_variant
XR_002959291.1|CSMD2|chr1|-	GTEX-131XW	chr1	34103474	intron_variant
XR_002959291.1|CSMD2|chr1|-	GTEX-131XW	chr1	34127232	intron_variant
XR_922915.2|INPP4A|chr2|+	GTEX-11GS4	chr2	98445280	intron_variant

## Sheet: Table S3
Supplementary Table 3. Genomic features used in aWatershed model
aOutlier-weight: the weight learnt by aWatershed model, defining the contribution of each genomic feature to aOutlier signal.
eOutlier-weight: the weight learnt by aWatershed model, defining the contribution of each genomic feature to aOutlier signal.
sOutlier-weight: the weight learnt by aWatershed model, defining the contribution of each genomic feature to aOutlier signal.
Feature_Name	Description	Feature_abbreviation	aOutlier-weight	eOutlier-weight	sOutlier-weight
any_PAS_region	any variant located in 50 bp upstream of known poly(A) sites	PAS_region	0.1078	0.027897	-0.0163501
any_PAS_motif	any variant located in the canonical poly(A) signal motif "AAUAAA" and its 14 variants	PAS_motif	0.1768	0.0787329	-0.0371528
any_splice_acceptor	any variant located in splice acceptor site	Splice_acceptor	0.00804042	0.113972	0.171545
any_splice_donor	any variant at splice donor site	Splice_donor	0.0149141	0.123336	0.205065
any_stop_gained	any variant that results in a premature stop codon	Stop_gained	0.0230189	0.177044	-0.0397243
any_stop_lost	any variant that changes the stop codon	Stop_lost	-0.0107702	-0.00026957	-0.00838635
any_start_lost	any variant that changes the start condon	Start_lost	-0.00548522	0.0490748	-0.0151158
any_missense_variant	any variant in coding region resulting in a different amino acid	Missense	0.0152087	-0.018111	0.138644
any_splice_region_variant	any variant in which a change has occurred within the region of the splice site, either within 1-3 bases of the exon or 3-8 bases of the intron	Splice_region	0.0301826	0.177332	0.293151
any_stop_retained_variant	any variant where at least one base in the terminator codon is changed, but the terminator remains	Stop_retained	-7.44332e-05	0.0162279	-0.000191618
any_synonymous_variant	any variant where there is no resulting change to the encoded amino acid	Synonymous	0.00688546	0.0025124	0.0798724
any_5_prime_UTR_variant	any variant in the 5'UTR	5_prime_UTR	0.0103851	0.120007	0.0549634
any_3_prime_UTR_variant	any variant in the 3'UTR	3_prime_UTR	0.101475	-0.0106046	-0.0463858
any_non_coding_transcript_exon_variant	any variant that changes non-coding exon sequence in a non-coding transcript	Non_coding_transcript_exon	-0.0152524	0.0212876	0.0134784
any_intron_variant	any variant occurred in intron region	Intron	0.00270655	-0.121721	-0.125731
any_upstream_gene_variant	any variant located 5' of a gene	Upstream_gene	0.0186933	0.0273719	-0.0216919
any_downstream_gene_variant	any variant located 3' of a gene	Downstream_gene	0.0157837	-0.0271014	0.0130665
any_intergenic_variant	any variant located in the intergenic region, between genes	Intergenic	0.0156692	-0.0356561	-0.0038184
max_GC	maximum of percent GC in a window of +/- 75bp across all nearby rare variants	GC	0.00403275	0.0532622	-0.00597515
max_caddNorm	maximum of CADD PHRED Score	CADD	0.0320822	0.284449	0.20856
max_pri_phylop	maximum of primate PhyloP score	Pri_phylop	0.00770081	-0.0436365	0.00598188
max_mam_phylop	maximum of mammalian PhyloP score	Mam_phylop	0.0159345	0.0583026	0.0574666
max_bStat	maximum of background selection score	b_Statistics	0.0201344	-0.0186193	0.0594605
max_GerpN	maximum of neutral evolution score defined by GERP++	GerpN	-0.01006	0.0393275	0.122435
max_GerpS	maximum of rejected Substitution score defined by GERP++	GerpS	0.00791356	0.0115656	-0.0267482
max_CpG	maximum of percent CpG in a window of +/- 75bp	CpG	-0.0077111	0.0842043	-0.0759755
max_h3k4me1_max	maximum Encode H3K4me1 level (from 13 cell lines)	H3K4me1	0.0492665	-0.127419	-0.0522076
max_h3k4me2_max	maximum Encode H3K4me2 level (from 14 cell lines)	H3K4me2	0.00660906	-0.0213325	0.00935564
max_h3k4me3_max	maximum Encode H3K4me3 level (from 14 cell lines)	H3K4me3	-0.0027857	0.114058	0.0437237
max_h3k9ac_max	maximum Encode H3K9ac level (from 13 cell lines)	H3K9ac	0.000888286	-0.0297854	-0.00591564
max_h3k9me3_max	maximum Encode H3K9me3 level (from 14 cell lines)	H3K9me3	-0.0204135	-0.0130519	-0.0367378
max_h3k27ac_max	maximum Encode H3K27ac level (from 14 cell lines)	H3K27ac	0.00939812	0.00595818	-0.0028145
max_h3k27me3_max	maximum Encode H3K27me3 level (from 14 cell lines)	H3K27me3	-0.0342451	-0.110823	0.0158915
max_h3k36me3_max	maximum Encode H3K79me2 level (from 13 cell lines)	H3K36me3	0.00775348	0.0344351	0.00896876
max_h3k79me2_max	maximum Encode H3K79me2 level (from 13 cell lines)	H3K79me2	0.00950723	-0.0714066	0.0354286
max_h4k20me1_max	maximum Encode H4K20me1 level (from 11 cell lines)	H4K20me1	-0.0131429	-0.165983	0.0195523
max_h2afz_max	maximum Encode H2AFZ level (from 13 cell lines)	H2afz	-0.0118785	0.0365956	0.0203588
max_dnase_max	maximum Encode DNase-seq level (from 12 cell lines)	Dnase	-0.0014788	0.0307139	-0.043207

## Sheet: Table S4
Suplementary Table 4. aWatershed prioritized functional RVs impacting APA.
#chrom: chromosome name of the variants.
#position: genomic coordinates based on human genome build GRCh38.
#Gene: Essembl gene ID of the gene near the RV.
#GeneName: gene name of the gene near the RV.
#Posterior_APA: posterior probability of a rare variant assigned by aWatershed based on aOutlier signals.
#Posterior_Expression: posterior probability of a rare variant assigned by aWatershed based on eOutlier signals.
#Posterior_Splicing: posterior probability of a rare variant assigned by aWatershed based on sOutlier signals.
chrom	position	Gene	GeneName	Posterior_APA	Posterior_Expression	Posterior_Splicing
chr10	100266035	ENSG00000196072	BLOC1S2	0.595436	0.00169783	0.00519236
chr10	100266775	ENSG00000196072	BLOC1S2	0.550169	0.00290615	0.0173265
chr10	100273061	ENSG00000196072	BLOC1S2	0.538958	0.00372037	0.0087594
chr10	100274053	ENSG00000196072	BLOC1S2	0.584899	0.00378118	0.00422876
chr10	100274628	ENSG00000196072	BLOC1S2	0.634546	0.00388833	0.00648142
chr10	100277280	ENSG00000196072	BLOC1S2	0.533577	0.00791683	0.00431661
chr10	100278241	ENSG00000196072	BLOC1S2	0.519669	0.00623799	0.00404098
chr10	100280648	ENSG00000196072	BLOC1S2	0.521297	0.00307238	0.00821199
chr10	100282486	ENSG00000196072	BLOC1S2	0.549614	0.00127827	0.00508105
chr10	100283935	ENSG00000196072	BLOC1S2	0.5523	0.00293415	0.00658158
chr10	100285422	ENSG00000196072	BLOC1S2	0.513284	0.00197411	0.00315419
chr10	100291107	ENSG00000196072	BLOC1S2	0.577094	0.00260096	0.0323296
chr10	100291392	ENSG00000196072	BLOC1S2	0.582815	0.00540069	0.0520358
chr10	100291942	ENSG00000196072	BLOC1S2	0.537169	0.00139099	0.00464304
chr10	100294752	ENSG00000196072	BLOC1S2	0.579149	0.00330431	0.0362226
chr10	100296216	ENSG00000196072	BLOC1S2	0.595706	0.0111203	0.0918564
chr10	104246270	ENSG00000148834	GSTO1	0.563075	0.00161807	0.0386101
chr10	104261032	ENSG00000148834	GSTO1	0.517844	0.0034944	0.00738422
chr10	104276020	ENSG00000148834	GSTO1	0.505997	0.00375991	0.00599944
chr10	132775616	ENSG00000148826	NKX6-2	0.525716	0.00197262	0.0232826
chr10	132779212	ENSG00000148826	NKX6-2	0.509118	0.0024078	0.0189297
chr10	132781777	ENSG00000148826	NKX6-2	0.545079	0.00368112	0.0232309
chr10	35030088	ENSG00000108094	CUL2	0.526681	0.00288384	0.0231489
chr10	35041449	ENSG00000108094	CUL2	0.51154	0.00160564	0.00388835
chr10	35041805	ENSG00000108094	CUL2	0.500136	0.00177269	0.0156818
chr10	35061962	ENSG00000108094	CUL2	0.522143	0.00367968	0.00625509
chr10	35077419	ENSG00000108094	CUL2	0.514764	0.00522769	0.0295842
chr10	37803085	ENSG00000198105	ZNF248	0.592668	0.978316	0.0192198
chr10	37846592	ENSG00000198105	ZNF248	0.511807	0.959931	0.0195574
chr10	58389272	ENSG00000108064	TFAM	0.525426	0.00302864	0.0065725
chr10	58400130	ENSG00000108064	TFAM	0.54521	0.00250675	0.00746405
chr10	58405220	ENSG00000108064	TFAM	0.508982	0.00336339	0.00915144
chr10	6604832	ENSG00000237943	PRKCQ-AS1	0.523602	0.0233934	0.0229167
chr10	6621176	ENSG00000237943	PRKCQ-AS1	0.642243	0.410589	0.84642
chr10	69397239	ENSG00000075073	TACR2	0.530658	0.00318012	0.00568332
chr10	69397244	ENSG00000075073	TACR2	0.54808	0.00333947	0.00627073
chr10	69399536	ENSG00000075073	TACR2	0.506991	0.00266223	0.0264065
chr10	69400026	ENSG00000075073	TACR2	0.512184	0.00306579	0.0332403
chr10	69400171	ENSG00000075073	TACR2	0.513492	0.00230262	0.033499
chr10	69400994	ENSG00000075073	TACR2	0.561571	0.0186186	0.277069
chr10	69401141	ENSG00000075073	TACR2	0.800254	0.0108085	0.00498106
chr10	69401215	ENSG00000075073	TACR2	0.685369	0.0108291	0.0472036
chr10	69401303	ENSG00000075073	TACR2	0.786651	0.0132904	0.00880115
chr10	69401525	ENSG00000075073	TACR2	0.552273	0.00286603	0.0276216
chr10	69403382	ENSG00000075073	TACR2	0.500431	0.00123729	0.0231531
chr10	69403391	ENSG00000075073	TACR2	0.535374	0.00183264	0.00639282
chr10	69403971	ENSG00000075073	TACR2	0.602262	0.00211328	0.0228117
chr10	69404013	ENSG00000075073	TACR2	0.606171	0.00176347	0.0037221
chr10	69404049	ENSG00000075073	TACR2	0.61755	0.00224394	0.00455354
chr10	69404126	ENSG00000075073	TACR2	0.545839	0.00212206	0.0230461
chr10	69404175	ENSG00000075073	TACR2	0.619872	0.00303	0.0296046
chr10	69404426	ENSG00000075073	TACR2	0.598805	0.00307577	0.0260161
chr10	69404734	ENSG00000075073	TACR2	0.634681	0.00264494	0.0213815
chr10	69404839	ENSG00000075073	TACR2	0.544704	0.00567916	0.173894
chr10	69404936	ENSG00000075073	TACR2	0.518443	0.00254169	0.122609
chr10	69406336	ENSG00000075073	TACR2	0.518488	0.00219413	0.0252043
chr10	69406502	ENSG00000075073	TACR2	0.527297	0.0036911	0.0330748
chr10	69407291	ENSG00000075073	TACR2	0.567795	0.00954121	0.0702379
chr10	69407727	ENSG00000075073	TACR2	0.56089	0.00361098	0.0279002
chr10	69408071	ENSG00000075073	TACR2	0.593763	0.00155486	0.00478231
chr10	69408121	ENSG00000075073	TACR2	0.589774	0.00150611	0.0193246
chr10	69408232	ENSG00000075073	TACR2	0.575853	0.00167971	0.0216555
chr10	69408252	ENSG00000075073	TACR2	0.555097	0.00141644	0.00385791
chr10	69408442	ENSG00000075073	TACR2	0.508868	0.00337481	0.00562666
chr10	69409010	ENSG00000075073	TACR2	0.515524	0.0164693	0.0452534
chr10	69413368	ENSG00000075073	TACR2	0.553783	0.00407223	0.0280498
chr10	69413677	ENSG00000075073	TACR2	0.561995	0.00417315	0.0440883
chr10	69414441	ENSG00000075073	TACR2	0.510686	0.00254032	0.00438062
chr10	69415816	ENSG00000075073	TACR2	0.519774	0.00362543	0.0333412
chr10	69416495	ENSG00000075073	TACR2	0.516165	0.0170659	0.0178219
chr10	69423174	ENSG00000075073	TACR2	0.530099	0.00292247	0.00840211
chr10	69426024	ENSG00000075073	TACR2	0.512428	0.00220488	0.0244385
chr10	70138963	ENSG00000079332	SAR1A	0.558506	0.00332654	0.00282669
chr10	70145319	ENSG00000079332	SAR1A	0.51307	0.000602796	0.00426811
chr10	70147315	ENSG00000079332	SAR1A	0.768391	0.00303238	0.00293914
chr10	70175043	ENSG00000079332	SAR1A	0.527019	0.00309362	0.00539037
chr10	71738119	ENSG00000107738	VSIR	0.55123	0.00270387	0.0315279
chr10	71738445	ENSG00000107738	VSIR	0.577781	0.00155252	0.0218781
chr10	71738587	ENSG00000107738	VSIR	0.522606	0.0031731	0.0840708
chr10	71738997	ENSG00000107738	VSIR	0.547072	0.0012716	0.013745
chr10	71739051	ENSG00000107738	VSIR	0.580636	0.00108773	0.0128412
chr10	71739067	ENSG00000107738	VSIR	0.607406	0.00104376	0.0140145
chr10	71739264	ENSG00000107738	VSIR	0.608626	0.00157826	0.0204244
chr10	71739267	ENSG00000107738	VSIR	0.63065	0.00138075	0.0200445
chr10	71739328	ENSG00000107738	VSIR	0.602657	0.00105986	0.0155725
chr10	71739370	ENSG00000107738	VSIR	0.536755	0.0012145	0.0142972
chr10	71739437	ENSG00000107738	VSIR	0.604089	0.0013052	0.0181291
chr10	71739487	ENSG00000107738	VSIR	0.633023	0.00157145	0.0220296
chr10	71739573	ENSG00000107738	VSIR	0.591868	0.00154158	0.0214767
chr10	71740842	ENSG00000107738	VSIR	0.64279	0.00888908	0.196984
chr10	71741309	ENSG00000107738	VSIR	0.554749	0.000928874	0.0167912
chr10	71743011	ENSG00000107738	VSIR	0.576046	0.00139051	0.0145668
chr10	71744531	ENSG00000107738	VSIR	0.560901	0.00164678	0.0207949
chr10	71745330	ENSG00000107738	VSIR	0.500534	0.00140539	0.0173833
chr10	71746372	ENSG00000107738	VSIR	0.586461	0.00199918	0.0216027
chr10	71751727	ENSG00000107738	VSIR	0.763654	0.00890295	0.365492
chr10	71755988	ENSG00000107738	VSIR	0.541716	0.00120709	0.0216682
chr10	71766330	ENSG00000107738	VSIR	0.602373	0.000320208	0.0179344
chr10	71773600	ENSG00000107738	VSIR	0.505946	0.00913244	0.0167843
chr10	90914280	ENSG00000148677	ANKRD1	0.582842	0.00188527	0.00512107
chr10	90921781	ENSG00000148677	ANKRD1	0.575142	0.00474539	0.00910689
chr10	90921881	ENSG00000148677	ANKRD1	0.501502	0.00341297	0.00591923
chr10	90930620	ENSG00000148677	ANKRD1	0.549172	0.002171	0.00626287
chr10	92003179	ENSG00000095564	BTAF1	0.505003	0.00254903	0.0034003
chr11	116782176	ENSG00000109917	ZPR1	0.537341	0.0150433	0.375387
chr11	116787938	ENSG00000109917	ZPR1	0.513947	0.0348245	0.253335
chr11	119303534	ENSG00000076706	MCAM	0.554325	0.00281862	0.0049227
chr11	119316481	ENSG00000076706	MCAM	0.551753	0.00224292	0.00788172
chr11	119321037	ENSG00000076706	MCAM	0.511934	0.00195938	0.00338896
chr11	121295124	ENSG00000109929	SC5D	0.559962	0.00157816	0.027798
chr11	121299819	ENSG00000109929	SC5D	0.505797	0.00182066	0.0197929
chr11	121300077	ENSG00000109929	SC5D	0.517747	0.971256	0.0361272
chr11	121308612	ENSG00000109929	SC5D	0.997016	0.999072	0.00993102
chr11	123390561	ENSG00000023171	GRAMD1B	0.511699	0.00316635	0.032704
chr11	123391477	ENSG00000023171	GRAMD1B	0.523548	0.00174955	0.0156598
chr11	123443883	ENSG00000023171	GRAMD1B	0.540682	0.00270807	0.0232746
chr11	123448656	ENSG00000023171	GRAMD1B	0.516839	0.00165616	0.0228882
chr11	123469889	ENSG00000023171	GRAMD1B	0.524564	0.00414562	0.0424081
chr11	123470219	ENSG00000023171	GRAMD1B	0.500737	0.00176172	0.0209938
chr11	123479144	ENSG00000023171	GRAMD1B	0.501116	0.0021033	0.0170553
chr11	123545387	ENSG00000023171	GRAMD1B	0.563476	0.00265843	0.0333195
chr11	123546236	ENSG00000023171	GRAMD1B	0.529649	0.00245476	0.0352909
chr11	123552785	ENSG00000023171	GRAMD1B	0.565205	0.00362143	0.0466129
chr11	123556886	ENSG00000023171	GRAMD1B	0.5507	0.00216601	0.0372798
chr11	124883890	ENSG00000154133	ROBO4	0.573512	0.00214457	0.00325567
chr11	125089745	ENSG00000150433	TMEM218	0.540187	0.00477145	0.010187
chr11	125097054	ENSG00000150433	TMEM218	0.941381	0.0336728	0.000922128
chr11	14791734	ENSG00000152270	PDE3B	0.50828	0.00394659	0.0318516
chr11	26450660	ENSG00000134343	ANO3	0.504984	0.00243285	0.0226276
chr11	26469969	ENSG00000134343	ANO3	0.507208	0.00359821	0.0382883
chr11	26483164	ENSG00000134343	ANO3	0.509187	0.0025606	0.0221294
chr11	26577158	ENSG00000134343	ANO3	0.530256	0.00269979	0.024508
chr11	26591354	ENSG00000134343	ANO3	0.512016	0.00327737	0.021428
chr11	26609393	ENSG00000134343	ANO3	0.528302	0.00402735	0.0294903
chr11	26614815	ENSG00000134343	ANO3	0.50676	0.00307656	0.0230237
chr11	33693463	ENSG00000085063	CD59	0.510411	0.00184074	0.0191737
chr11	33710078	ENSG00000085063	CD59	0.829315	0.00612232	0.0269309
chr11	33722400	ENSG00000085063	CD59	0.607388	0.00362997	0.034623
chr11	33725480	ENSG00000085063	CD59	0.569266	0.00128905	0.0294351
chr11	33736972	ENSG00000085063	CD59	0.526786	0.00872466	0.0593799
chr11	44117733	ENSG00000151348	EXT2	0.992498	0.0794584	0.00828948
chr11	44158127	ENSG00000151348	EXT2	0.507531	0.00178128	0.0191255
chr11	44201410	ENSG00000151348	EXT2	0.518233	0.00398811	0.0362334
chr11	44245440	ENSG00000151348	EXT2	0.69707	0.00803736	0.0113153
chr11	60890531	ENSG00000110107	PRPF19	0.503066	0.0024422	0.00699236
chr11	61516387	ENSG00000011347	SYT7	0.555345	0.00300693	0.0185688
chr11	61523086	ENSG00000011347	SYT7	0.595828	0.0133554	0.336603
chr11	61544792	ENSG00000011347	SYT7	0.543947	0.00371129	0.00588159
chr11	61546823	ENSG00000011347	SYT7	0.576652	0.102013	0.0285024
chr11	61562827	ENSG00000011347	SYT7	0.545911	0.00470691	0.00818489
chr11	61568319	ENSG00000011347	SYT7	0.50778	0.00139714	0.0183667
chr11	73927715	ENSG00000175575	PAAF1	0.946615	0.0871788	0.00142646
chr11	77124051	ENSG00000137474	MYO7A	0.601294	0.0035515	0.0042453
chr11	77125415	ENSG00000137474	MYO7A	0.564033	0.00287686	0.0193457
chr11	77125604	ENSG00000137474	MYO7A	0.554684	0.00321623	0.00429506
chr11	77140167	ENSG00000137474	MYO7A	0.518281	0.00280163	0.00531149
chr11	77146529	ENSG00000137474	MYO7A	0.534074	0.0398548	0.0338904
chr11	77159450	ENSG00000137474	MYO7A	0.584892	0.0185816	0.11573
chr11	77172237	ENSG00000137474	MYO7A	0.526791	0.00168916	0.00568209
chr11	77179894	ENSG00000137474	MYO7A	0.592558	0.178881	0.325069
chr11	77202364	ENSG00000137474	MYO7A	0.506819	0.00642288	0.0399239
chr11	77203599	ENSG00000137474	MYO7A	0.519384	0.0039667	0.0305965
chr11	840224	ENSG00000177700	POLR2L	0.998249	0.996419	0.00948389
chr11	96358167	ENSG00000149231	CCDC82	0.583179	0.00521507	0.00675596
chr12	116714860	ENSG00000111412	C12orf49	0.524727	0.0022611	0.0143564
chr12	116717930	ENSG00000111412	C12orf49	0.541994	0.00359785	0.0287045
chr12	116744699	ENSG00000111412	C12orf49	0.545963	0.00391406	0.0350079
chr12	121308371	ENSG00000089053	ANAPC5	0.99761	0.115924	0.00245112
chr12	121347891	ENSG00000089053	ANAPC5	0.542787	0.00321645	0.00938677
chr12	2069036	ENSG00000151067	CACNA1C	0.502122	0.00251591	0.00526175
chr12	2256121	ENSG00000151067	CACNA1C	0.505766	0.00286375	0.00647094
chr12	2256124	ENSG00000151067	CACNA1C	0.533879	0.00320199	0.00641106
chr12	2310971	ENSG00000151067	CACNA1C	0.502073	0.00181124	0.00421837
chr12	2315943	ENSG00000151067	CACNA1C	0.501628	0.00185224	0.0205314
chr12	2329937	ENSG00000151067	CACNA1C	0.539156	0.00218995	0.00513538
chr12	2356133	ENSG00000151067	CACNA1C	0.550833	0.0025693	0.0294126
chr12	2375665	ENSG00000151067	CACNA1C	0.50151	0.00262696	0.00587708
chr12	2389473	ENSG00000151067	CACNA1C	0.506557	0.0017451	0.0241657
chr12	2394282	ENSG00000151067	CACNA1C	0.511396	0.00217643	0.00394396
chr12	2394689	ENSG00000151067	CACNA1C	0.504717	0.00186171	0.00450687
chr12	2437676	ENSG00000151067	CACNA1C	0.525588	0.00210785	0.00466753
chr12	2450365	ENSG00000151067	CACNA1C	0.513998	0.00393427	0.0033122
chr12	2473552	ENSG00000151067	CACNA1C	0.553052	0.00483597	0.00899544
chr12	2501951	ENSG00000151067	CACNA1C	0.523653	0.00212888	0.0247748
chr12	2505582	ENSG00000151067	CACNA1C	0.519718	0.00262898	0.00447012
chr12	2529969	ENSG00000151067	CACNA1C	0.564463	0.0053578	0.0127831
chr12	2532079	ENSG00000151067	CACNA1C	0.554867	0.00304792	0.0070381
chr12	2615689	ENSG00000151067	CACNA1C	0.504269	0.00184252	0.00278153
chr12	2652754	ENSG00000151067	CACNA1C	0.566164	0.00334525	0.00529302
chr12	26966332	ENSG00000064115	TM7SF3	0.992962	0.0456237	0.00117673
chr12	2697222	ENSG00000151067	CACNA1C	0.649176	0.0021225	0.0247362
chr12	27010623	ENSG00000064115	TM7SF3	0.993418	0.520564	0.00291377
chr12	53167240	ENSG00000139631	CSAD	0.519075	0.00264072	0.00482452
chr12	53709376	ENSG00000012822	CALCOCO1	0.573467	0.00377901	0.025717
chr12	53725208	ENSG00000012822	CALCOCO1	0.50041	0.0142388	0.278645
chr12	54948702	ENSG00000135426	TESPA1	0.598568	0.00348179	0.00471263
chr12	54949957	ENSG00000135426	TESPA1	0.57538	0.0026537	0.00503154
chr12	54954035	ENSG00000135426	TESPA1	0.503927	0.00226977	0.00459752
chr12	54959711	ENSG00000135426	TESPA1	0.509829	0.0031418	0.00642784
chr12	54963039	ENSG00000135426	TESPA1	0.548621	0.00901806	0.0687034
chr12	54964899	ENSG00000135426	TESPA1	0.513274	0.00304989	0.00660851
chr12	54969829	ENSG00000135426	TESPA1	0.554494	0.00156824	0.00373994
chr12	54970909	ENSG00000135426	TESPA1	0.550689	0.00351676	0.00675703
chr12	54973957	ENSG00000135426	TESPA1	0.525254	0.00342101	0.00628977
chr12	54975527	ENSG00000135426	TESPA1	0.513728	0.00236963	0.0064228
chr12	54976745	ENSG00000135426	TESPA1	0.502767	0.00137048	0.00457286
chr12	54980300	ENSG00000135426	TESPA1	0.545683	0.0019814	0.00596036
chr12	54982378	ENSG00000135426	TESPA1	0.507221	0.00132136	0.00383413
chr12	54984549	ENSG00000135426	TESPA1	0.515001	0.00287189	0.00912061
chr12	54991611	ENSG00000135426	TESPA1	0.573079	0.00174767	0.00674232
chr12	54992850	ENSG00000135426	TESPA1	0.511261	0.00237755	0.00567128
chr12	56117772	ENSG00000229117	RPL41	0.623427	0.00677742	0.0115407
chr12	62514011	ENSG00000061987	MON2	0.501153	0.00299795	0.00409816
chr12	62527273	ENSG00000061987	MON2	0.500701	0.00242149	0.00466383
chr12	62593257	ENSG00000061987	MON2	0.997736	0.150288	0.00344726
chr12	6536966	ENSG00000111640	GAPDH	0.622184	0.00877971	0.0714197
chr12	6540505	ENSG00000111640	GAPDH	0.508776	0.00854524	0.0627053
chr12	75501825	ENSG00000139278	GLIPR1	0.997113	0.0544804	0.00965341
chr12	76054066	ENSG00000187109	NAP1L1	0.533226	0.00237494	0.0252359
chr12	8247080	ENSG00000164845	FAM86FP	0.508792	0.0501541	0.0287595
chr13	112885948	ENSG00000126217	MCF2L	0.624178	0.00304684	0.0225502
chr13	112903581	ENSG00000126217	MCF2L	0.54553	0.00225434	0.00413349
chr13	112909017	ENSG00000126217	MCF2L	0.531919	0.0292045	0.00315049
chr13	112917532	ENSG00000126217	MCF2L	0.677669	0.0412897	0.304526
chr13	112918134	ENSG00000126217	MCF2L	0.559085	0.00112315	0.00304219
chr13	112919416	ENSG00000126217	MCF2L	0.513692	0.0036416	0.00262034
chr13	112932511	ENSG00000126217	MCF2L	0.503836	0.0300252	0.00527425
chr13	112938871	ENSG00000126217	MCF2L	0.521273	0.0016597	0.0033127
chr13	112940987	ENSG00000126217	MCF2L	0.518562	0.00140209	0.004161
chr13	112943309	ENSG00000126217	MCF2L	0.522962	0.00141518	0.021389
chr13	112955867	ENSG00000126217	MCF2L	0.504028	0.00149042	0.00347278
chr13	112959403	ENSG00000126217	MCF2L	0.513956	0.00164754	0.00310978
chr13	112960460	ENSG00000126217	MCF2L	0.519044	0.00198525	0.00382728
chr13	112966433	ENSG00000126217	MCF2L	0.519651	0.00216065	0.00613187
chr13	112984631	ENSG00000126217	MCF2L	0.545005	0.0019301	0.00392793
chr13	112997945	ENSG00000126217	MCF2L	0.525074	0.00183536	0.00387911
chr13	113002939	ENSG00000126217	MCF2L	0.518348	0.00163322	0.0038076
chr13	113009187	ENSG00000126217	MCF2L	0.541161	0.00382657	0.00555868
chr13	113010719	ENSG00000126217	MCF2L	0.54728	0.00144037	0.00277487
chr13	113010863	ENSG00000126217	MCF2L	0.55938	0.00167222	0.00346772
chr13	113014063	ENSG00000126217	MCF2L	0.504754	0.00225036	0.00468332
chr13	113016803	ENSG00000126217	MCF2L	0.579625	0.0436593	0.00303591
chr13	113027823	ENSG00000126217	MCF2L	0.509568	0.00190412	0.00335671
chr13	113041900	ENSG00000126217	MCF2L	0.500746	0.0215107	0.00389125
chr13	113049365	ENSG00000126217	MCF2L	0.53074	0.00210103	0.00354265
chr13	113053075	ENSG00000126217	MCF2L	0.546378	0.00212888	0.0235647
chr13	113055582	ENSG00000126217	MCF2L	0.547857	0.00211712	0.00382271
chr13	113059141	ENSG00000126217	MCF2L	0.51767	0.0271752	0.00457408
chr13	113062361	ENSG00000126217	MCF2L	0.522408	0.00221205	0.00342812
chr13	113087456	ENSG00000126217	MCF2L	0.626003	0.0683407	0.575116
chr13	113096891	ENSG00000126217	MCF2L	0.582864	0.0602191	0.00242812
chr13	113097481	ENSG00000126217	MCF2L	0.60832	0.00248387	0.00397011
chr13	113098398	ENSG00000126217	MCF2L	0.804921	0.00505292	0.00243322
chr13	113104854	ENSG00000126217	MCF2L	0.536136	0.00278695	0.00470194
chr13	113108326	ENSG00000126217	MCF2L	0.507091	0.0643224	0.00403043
chr13	113109318	ENSG00000126217	MCF2L	0.599791	0.00294113	0.00409221
chr13	20728947	ENSG00000150456	EEF1AKMT1	0.997516	0.0637352	0.00119891
chr13	20772602	ENSG00000150456	EEF1AKMT1	0.588223	0.00206017	0.00584787
chr13	32425917	ENSG00000244754	N4BP2L2	0.554573	0.00245431	0.162786
chr13	32449626	ENSG00000244754	N4BP2L2	0.504645	0.00374889	0.00598684
chr13	32460617	ENSG00000244754	N4BP2L2	0.507237	0.0033105	0.00552212
chr13	32463183	ENSG00000244754	N4BP2L2	0.501878	0.00255527	0.00453074
chr13	32469085	ENSG00000244754	N4BP2L2	0.52487	0.00365148	0.0246684
chr13	32476983	ENSG00000244754	N4BP2L2	0.544069	0.00358126	0.00530297
chr13	32478011	ENSG00000244754	N4BP2L2	0.502768	0.00966318	0.0219742
chr13	32480137	ENSG00000244754	N4BP2L2	0.540771	0.0053912	0.00837022
chr13	32484594	ENSG00000244754	N4BP2L2	0.512517	0.00367056	0.0192215
chr13	32487148	ENSG00000244754	N4BP2L2	0.52367	0.00216471	0.0193325
chr13	32494540	ENSG00000244754	N4BP2L2	0.502643	0.00301667	0.0152579
chr13	32497918	ENSG00000244754	N4BP2L2	0.511125	0.00320318	0.0309596
chr13	32500575	ENSG00000244754	N4BP2L2	0.521006	0.00222663	0.00449794
chr13	32515565	ENSG00000244754	N4BP2L2	0.506142	0.00320192	0.00448408
chr13	32527002	ENSG00000244754	N4BP2L2	0.642762	0.00296174	0.00792682
chr13	32537182	ENSG00000244754	N4BP2L2	0.513665	0.002053	0.00676308
chr13	42954369	ENSG00000133106	EPSTI1	0.510837	0.00519395	0.00941202
chr13	48047206	ENSG00000136146	MED4	0.996982	0.0543543	0.00611087
chr13	48054326	ENSG00000136146	MED4	0.713931	0.00372167	0.00429544
chr13	48055238	ENSG00000136146	MED4	0.500005	0.00229616	0.00509465
chr13	48066090	ENSG00000136146	MED4	0.501048	0.00246717	0.00415067
chr13	48068029	ENSG00000136146	MED4	0.621183	0.00310267	0.0040246
chr13	48077193	ENSG00000136146	MED4	0.738621	0.0142622	0.266849
chr13	48079674	ENSG00000136146	MED4	0.512987	0.00246994	0.00365243
chr13	48081523	ENSG00000136146	MED4	0.518922	0.00374716	0.00825236
chr13	48082609	ENSG00000136146	MED4	0.523886	0.00293403	0.0034928
chr13	48085459	ENSG00000136146	MED4	0.510134	0.00237033	0.00405713
chr13	48086191	ENSG00000136146	MED4	0.558738	0.00368514	0.0116717
chr13	48089473	ENSG00000136146	MED4	0.530871	0.00164331	0.0285078
chr13	48093624	ENSG00000136146	MED4	0.61449	0.00769038	0.0145928
chr13	48094336	ENSG00000136146	MED4	0.536724	0.00156758	0.00965243
chr13	48096108	ENSG00000136146	MED4	0.57715	0.00286968	0.00667835
chr13	48096841	ENSG00000136146	MED4	0.514299	0.00532797	0.0107439
chr13	48103561	ENSG00000136146	MED4	0.5266	0.0383795	0.0456414
chr13	66293031	ENSG00000184226	PCDH9	0.511458	0.00294648	0.00888387
chr13	66294270	ENSG00000184226	PCDH9	0.50472	0.0210241	0.0272381
chr13	66295806	ENSG00000184226	PCDH9	0.513452	0.033106	0.024225
chr13	66299512	ENSG00000184226	PCDH9	0.500253	0.0401018	0.0266232
chr13	66307078	ENSG00000184226	PCDH9	0.536388	0.0295139	0.02747
chr13	66308099	ENSG00000184226	PCDH9	0.501684	0.0331425	0.0233665
chr13	66308820	ENSG00000184226	PCDH9	0.557551	0.00403544	0.0345455
chr13	66314197	ENSG00000184226	PCDH9	0.51276	0.0262433	0.0193486
chr13	66316932	ENSG00000184226	PCDH9	0.529301	0.0382385	0.0203231
chr13	66342704	ENSG00000184226	PCDH9	0.509562	0.0305031	0.0158356
chr13	66350797	ENSG00000184226	PCDH9	0.519607	0.00234869	0.0252568
chr13	66366341	ENSG00000184226	PCDH9	0.50074	0.00293425	0.029446
chr13	66431550	ENSG00000184226	PCDH9	0.50333	0.00208176	0.0804337
chr13	66456080	ENSG00000184226	PCDH9	0.512316	0.0309643	0.0258908
chr13	66470816	ENSG00000184226	PCDH9	0.503074	0.00209481	0.109591
chr13	66493168	ENSG00000184226	PCDH9	0.50775	0.00198754	0.027937
chr13	66558540	ENSG00000184226	PCDH9	0.574273	0.00645581	0.0119749
chr13	66575072	ENSG00000184226	PCDH9	0.503871	0.0304253	0.0165428
chr13	66597568	ENSG00000184226	PCDH9	0.575093	0.0462878	0.0254572
chr13	66597662	ENSG00000184226	PCDH9	0.526893	0.0310857	0.0173514
chr13	66645004	ENSG00000184226	PCDH9	0.534734	0.032965	0.0304665
chr13	66657145	ENSG00000184226	PCDH9	0.514785	0.00305054	0.00594562
chr13	66817568	ENSG00000184226	PCDH9	0.501607	0.00282914	0.0297698
chr13	66973973	ENSG00000184226	PCDH9	0.511059	0.0391748	0.0320906
chr13	67044059	ENSG00000184226	PCDH9	0.528118	0.00278649	0.116501
chr13	67050215	ENSG00000184226	PCDH9	0.518119	0.00362776	0.0079031
chr13	67116219	ENSG00000184226	PCDH9	0.536294	0.00319457	0.00590005
chr13	67129130	ENSG00000184226	PCDH9	0.504347	0.00297629	0.0329194
chr14	104930048	ENSG00000166428	PLD4	0.515319	0.00648535	0.2103
chr14	22762519	ENSG00000155463	OXA1L	0.50964	0.00212986	0.00365072
chr14	22772285	ENSG00000155463	OXA1L	0.608203	0.00349965	0.00309797
chr14	22772307	ENSG00000155463	OXA1L	0.608898	0.00387764	0.0178678
chr14	22772310	ENSG00000155463	OXA1L	0.604954	0.00372106	0.00348304
chr14	23969160	ENSG00000157326	DHRS4	0.765041	0.00725391	0.00434764
chr14	23969873	ENSG00000157326	DHRS4	0.590337	0.0221125	0.00634024
chr14	23973375	ENSG00000157326	DHRS4	0.501341	0.00276371	0.00310943
chr14	57265323	ENSG00000053770	AP5M1	0.510851	0.00135493	0.00510278
chr14	57274845	ENSG00000053770	AP5M1	0.619334	0.0165547	0.124005
chr14	57285958	ENSG00000053770	AP5M1	0.529621	0.00360164	0.00535963
chr14	57289361	ENSG00000053770	AP5M1	0.587997	0.00357389	0.00590527
chr14	57289898	ENSG00000053770	AP5M1	0.602272	0.00423447	0.00681171
chr14	57290084	ENSG00000053770	AP5M1	0.531917	0.00298559	0.00521162
chr14	57299074	ENSG00000053770	AP5M1	0.509068	0.00472521	0.0126391
chr14	58234775	ENSG00000131966	ACTR10	0.956211	0.999364	0.00258476
chr14	58235440	ENSG00000131966	ACTR10	0.572513	0.00290853	0.00501044
chr14	69242387	ENSG00000081177	EXD2	0.568015	0.00208297	0.00448245
chr14	72054828	ENSG00000182732	RGS6	0.524099	0.00331595	0.0284014
chr14	72089523	ENSG00000182732	RGS6	0.536925	0.00492418	0.037523
chr14	72224831	ENSG00000182732	RGS6	0.517039	0.00200368	0.0799987
chr14	72226802	ENSG00000182732	RGS6	0.522665	0.00333577	0.0922576
chr14	72262356	ENSG00000182732	RGS6	0.507961	0.00188153	0.084915
chr14	72279480	ENSG00000182732	RGS6	0.517718	0.00250873	0.0200128
chr14	72292391	ENSG00000182732	RGS6	0.550168	0.00336311	0.024429
chr14	72295706	ENSG00000182732	RGS6	0.51097	0.00294497	0.00579956
chr14	72349212	ENSG00000182732	RGS6	0.503312	0.0035669	0.0300272
chr14	72418146	ENSG00000182732	RGS6	0.502094	0.00238908	0.0818267
chr14	72457857	ENSG00000182732	RGS6	0.504777	0.00357718	0.112401
chr14	72488589	ENSG00000182732	RGS6	0.516394	0.00209758	0.0979823
chr14	72527924	ENSG00000182732	RGS6	0.592011	0.0051523	0.0538101
chr14	72539933	ENSG00000182732	RGS6	0.596059	0.00511439	0.0635041
chr14	72565328	ENSG00000182732	RGS6	0.651029	0.0043418	0.110124
chr14	74469903	ENSG00000119655	NPC2	0.537154	0.0103544	0.99952
chr14	74480701	ENSG00000119655	NPC2	0.891749	0.462233	1
chr14	74499253	ENSG00000119655	NPC2	0.705807	0.00433666	0.997082
chr14	74500278	ENSG00000119655	NPC2	0.610834	0.0736409	0.00807254
chr14	75005799	ENSG00000119718	EIF2B2	0.511437	0.978637	0.0370949
chr14	75009020	ENSG00000119718	EIF2B2	0.614058	0.993063	0.0834297
chr14	75009236	ENSG00000119718	EIF2B2	0.633916	0.00525398	0.00840376
chr14	76058679	ENSG00000119650	IFT43	0.555664	0.99226	0.0776803
chr15	100556358	ENSG00000140471	LINS1	0.504745	0.00519985	0.00464427
chr15	100556397	ENSG00000140471	LINS1	0.511984	0.00501822	0.00426673
chr15	100559376	ENSG00000140471	LINS1	0.656417	0.0018945	0.00404224
chr15	100567439	ENSG00000140471	LINS1	0.54855	0.00254627	0.00370674
chr15	100567922	ENSG00000140471	LINS1	0.996878	0.042946	0.000904358
chr15	100570033	ENSG00000140471	LINS1	0.677105	0.00894527	0.0335021
chr15	100576709	ENSG00000140471	LINS1	0.613537	0.0722004	0.470203
chr15	100587449	ENSG00000140471	LINS1	0.572148	0.00374828	0.00627856
chr15	100588584	ENSG00000140471	LINS1	0.552797	0.00389222	0.00628369
chr15	100589514	ENSG00000140471	LINS1	0.601523	0.00259955	0.00410715
chr15	100599105	ENSG00000140471	LINS1	0.542076	0.00213497	0.00564788
chr15	100610813	ENSG00000140471	LINS1	0.545437	0.00287518	0.00812171
chr15	100611616	ENSG00000140471	LINS1	0.514477	0.00269468	0.00424825
chr15	22864619	ENSG00000273749	CYFIP1	0.5251	0.00112023	0.00448238
chr15	22870224	ENSG00000273749	CYFIP1	0.693365	0.00563177	0.00619457
chr15	22881802	ENSG00000273749	CYFIP1	0.54925	0.00377716	0.00545171
chr15	22893863	ENSG00000273749	CYFIP1	0.517747	0.00205502	0.00415005
chr15	22913353	ENSG00000273749	CYFIP1	0.511907	0.00343358	0.00405097
chr15	22926193	ENSG00000273749	CYFIP1	0.532643	0.0327035	0.0045718
chr15	22929814	ENSG00000273749	CYFIP1	0.501124	0.00420542	0.00388876
chr15	22933882	ENSG00000273749	CYFIP1	0.551988	0.0150097	0.0683119
chr15	22941944	ENSG00000273749	CYFIP1	0.508299	0.00231475	0.00434186
chr15	22944532	ENSG00000273749	CYFIP1	0.511338	0.0268023	0.00441653
chr15	22952582	ENSG00000273749	CYFIP1	0.536438	0.00234879	0.00445008
chr15	22953840	ENSG00000273749	CYFIP1	0.525418	0.00424488	0.00499212
chr15	22953860	ENSG00000273749	CYFIP1	0.507562	0.00347745	0.00347809
chr15	22975370	ENSG00000273749	CYFIP1	0.555193	0.00247921	0.00375781
chr15	22979950	ENSG00000273749	CYFIP1	0.525174	0.00979089	0.00976337
chr15	22985814	ENSG00000273749	CYFIP1	0.522902	0.00397581	0.00447363
chr15	39799739	ENSG00000166073	GPR176	0.623748	0.00356718	0.00640684
chr15	39824185	ENSG00000166073	GPR176	0.549829	0.00164653	0.0175417
chr15	40854418	ENSG00000166145	SPINT1	0.55177	0.0142361	0.06464
chr15	40857236	ENSG00000166145	SPINT1	0.599308	0.00398846	0.00589284
chr15	40857853	ENSG00000166145	SPINT1	0.582069	0.00442365	0.0181546
chr15	40860757	ENSG00000166145	SPINT1	0.621137	0.00356018	0.00412239
chr15	41569016	ENSG00000092445	TYRO3	0.576758	0.0144513	0.28549
chr15	41583047	ENSG00000092445	TYRO3	0.541822	0.00374654	0.0143922
chr15	41583217	ENSG00000092445	TYRO3	0.504848	0.00336555	0.0108604
chr15	56159553	ENSG00000181827	RFX7	0.510886	0.00285867	0.0239939
chr15	60451939	ENSG00000128915	ICE2	0.621228	0.430654	0.00680316
chr15	63330918	ENSG00000074410	CA12	0.684668	0.00268442	0.0607257
chr15	63351751	ENSG00000074410	CA12	0.529227	0.00203884	0.00398244
chr15	63375159	ENSG00000074410	CA12	0.51466	0.00156188	0.00442308
chr15	63380687	ENSG00000074410	CA12	0.508996	0.00195249	0.00811891
chr15	63524170	ENSG00000140455	USP3	0.571301	0.00164384	0.0113872
chr15	63570427	ENSG00000140455	USP3	0.672195	0.119995	0.668523
chr15	63590821	ENSG00000140455	USP3	0.646245	0.0177644	0.0898897
chr15	75209924	ENSG00000167173	C15orf39	0.516362	0.000847298	0.00774872
chr15	75212174	ENSG00000167173	C15orf39	0.515333	0.000929168	0.0415384
chr15	75214661	ENSG00000167173	C15orf39	0.50131	0.00216553	0.00700874
chr15	75375868	ENSG00000169375	SIN3A	0.533487	0.0106559	0.0365192
chr15	75420819	ENSG00000169375	SIN3A	0.642746	0.00414591	0.00728611
chr15	75441661	ENSG00000169375	SIN3A	0.565605	0.00347203	0.0421682
chr15	75447148	ENSG00000169375	SIN3A	0.556525	0.00170312	0.00830461
chr15	75452871	ENSG00000169375	SIN3A	0.515588	0.00240931	0.0422419
chr15	75456923	ENSG00000169375	SIN3A	0.535894	0.00402769	0.00768729
chr15	78280523	ENSG00000140403	DNAJA4	0.996292	0.171461	0.00289563
chr15	82503824	ENSG00000255769	GOLGA2P10	0.505247	0.0815178	0.0360911
chr15	82998142	ENSG00000169609	C15orf40	0.594687	0.00661921	0.00217731
chr15	82999459	ENSG00000169609	C15orf40	0.554426	0.0025804	0.00265445
chr15	82999869	ENSG00000169609	C15orf40	0.637013	0.00599881	0.035749
chr15	83002359	ENSG00000169609	C15orf40	0.559897	0.0372301	0.00362377
chr15	83003688	ENSG00000169609	C15orf40	0.592545	0.0399551	0.0226961
chr15	83018800	ENSG00000169609	C15orf40	0.554295	0.00922574	0.0864309
chr15	88656226	ENSG00000172183	ISG20	0.618274	0.00275042	0.00488562
chr15	88662474	ENSG00000172183	ISG20	0.563304	0.00468087	0.0101028
chr15	88663502	ENSG00000172183	ISG20	0.504001	0.0023144	0.00527634
chr16	10521579	ENSG00000213853	EMP2	0.541273	0.00289857	0.0275845
chr16	10530875	ENSG00000213853	EMP2	0.589655	0.00298062	0.00439628
chr16	10531118	ENSG00000213853	EMP2	0.599244	0.0479576	0.00350331
chr16	10537400	ENSG00000213853	EMP2	0.522417	0.00190753	0.00419372
chr16	10539840	ENSG00000213853	EMP2	0.526918	0.0364159	0.00399818
chr16	10554852	ENSG00000213853	EMP2	0.522479	0.00270513	0.00394856
chr16	10558725	ENSG00000213853	EMP2	0.543958	0.00177096	0.0276228
chr16	10563637	ENSG00000213853	EMP2	0.54182	0.00199155	0.00415016
chr16	10569569	ENSG00000213853	EMP2	0.507975	0.0232106	0.00431547
chr16	10580068	ENSG00000213853	EMP2	0.554293	0.00370423	0.0088611
chr16	1952864	ENSG00000140988	RPS2	0.511444	0.00334614	0.0226588
chr16	2022730	ENSG00000065054	SLC9A3R2	0.536276	0.00363841	0.1358
chr16	2022926	ENSG00000065054	SLC9A3R2	0.542194	0.00570676	0.157505
chr16	2023611	ENSG00000065054	SLC9A3R2	0.515674	0.00521427	0.126111
chr16	2025171	ENSG00000065054	SLC9A3R2	0.531776	0.00261561	0.134367
chr16	2034959	ENSG00000065054	SLC9A3R2	0.513958	0.00165891	0.101136
chr16	2035870	ENSG00000065054	SLC9A3R2	0.507663	0.00371474	0.0196813
chr16	2035957	ENSG00000065054	SLC9A3R2	0.519059	0.00379814	0.00463489
chr16	2036542	ENSG00000065054	SLC9A3R2	0.510823	0.00286694	0.00346255
chr16	2041464	ENSG00000065054	SLC9A3R2	0.533429	0.00264354	0.076857
chr16	23466733	ENSG00000103365	GGA2	0.5635	0.00323753	0.0188179
chr16	23482922	ENSG00000103365	GGA2	0.835902	0.997534	0.999085
chr16	23502887	ENSG00000103365	GGA2	0.53708	0.00423597	0.0411184
chr16	23518209	ENSG00000103365	GGA2	0.506945	0.00224842	0.00335017
chr16	2761631	ENSG00000103363	ELOB	0.512203	0.0020554	0.176534
chr16	2763635	ENSG00000103363	ELOB	0.509361	0.00284724	0.0467683
chr16	2764280	ENSG00000103363	ELOB	0.551531	0.00657446	0.253833
chr16	2770023	ENSG00000103363	ELOB	0.557506	0.00317768	0.0132742
chr16	2771791	ENSG00000103363	ELOB	0.595615	0.00190499	0.0257881
chr16	28532106	ENSG00000176046	NUPR1	0.520132	0.0233121	0.0047962
chr16	28534396	ENSG00000176046	NUPR1	0.666374	0.0337079	0.00378182
chr16	28534738	ENSG00000176046	NUPR1	0.572349	0.0455985	0.00363511
chr16	28535015	ENSG00000176046	NUPR1	0.669747	0.0348702	0.00511887
chr16	28535039	ENSG00000176046	NUPR1	0.641838	0.0248195	0.00397576
chr16	28535041	ENSG00000176046	NUPR1	0.638278	0.0241175	0.00399043
chr16	28535760	ENSG00000176046	NUPR1	0.588168	0.0275922	0.00343243
chr16	28536574	ENSG00000176046	NUPR1	0.554581	0.0402367	0.00356032
chr16	28536733	ENSG00000176046	NUPR1	0.581629	0.0405888	0.00334884
chr16	28536909	ENSG00000176046	NUPR1	0.55927	0.0411041	0.00352078
chr16	28537086	ENSG00000176046	NUPR1	0.599913	0.0432152	0.00444861
chr16	28537450	ENSG00000176046	NUPR1	0.796537	0.0713472	0.00480603
chr16	28537588	ENSG00000176046	NUPR1	0.564942	0.00547575	0.00519932
chr16	28537778	ENSG00000176046	NUPR1	0.537825	0.053302	0.00873763
chr16	28541315	ENSG00000176046	NUPR1	0.512044	0.0251207	0.00351459
chr16	28543173	ENSG00000176046	NUPR1	0.530022	0.0309037	0.00321345
chr16	28545802	ENSG00000176046	NUPR1	0.502374	0.0265678	0.00344122
chr16	28546253	ENSG00000176046	NUPR1	0.522804	0.0394634	0.00415155
chr16	28547072	ENSG00000176046	NUPR1	0.502882	0.0494866	0.0068002
chr16	2927337	ENSG00000059122	FLYWCH1	0.511657	0.00217898	0.00311707
chr16	2949791	ENSG00000059122	FLYWCH1	0.949483	0.0573599	0.000933888
chr16	31183391	ENSG00000089280	FUS	0.501614	0.00129493	0.0371084
chr16	3533062	ENSG00000103351	CLUAP1	0.580058	0.00336955	0.0297718
chr16	3541218	ENSG00000103351	CLUAP1	0.598805	0.0040532	0.00490069
chr16	3548190	ENSG00000103351	CLUAP1	0.592743	0.0137326	0.102177
chr16	3624080	ENSG00000213918	DNASE1	0.502736	0.00275746	0.0161584
chr16	3636001	ENSG00000213918	DNASE1	0.502628	0.00206445	0.0033822
chr16	3637793	ENSG00000213918	DNASE1	0.535544	0.00128404	0.00350447
chr16	3637910	ENSG00000213918	DNASE1	0.545885	0.00162182	0.0216554
chr16	3655478	ENSG00000213918	DNASE1	0.548154	0.00868363	0.0667819
chr16	3662062	ENSG00000213918	DNASE1	0.63775	0.0365431	0.428552
chr16	3662498	ENSG00000213918	DNASE1	0.564791	0.0379979	0.0189132
chr16	3664437	ENSG00000213918	DNASE1	0.622694	0.28204	0.35552
chr16	3666030	ENSG00000213918	DNASE1	0.511788	0.0107462	0.0643356
chr16	3668695	ENSG00000213918	DNASE1	0.54505	0.0023928	0.0170865
chr16	3674239	ENSG00000213918	DNASE1	0.511863	0.00273377	0.00420928
chr16	50106367	ENSG00000155393	HEATR3	0.997459	0.10829	0.00220945
chr16	64934548	ENSG00000140937	CDH11	0.512275	0.00194592	0.0046939
chr16	64956329	ENSG00000140937	CDH11	0.548334	0.00711156	0.0485161
chr16	64984609	ENSG00000140937	CDH11	0.526209	0.00734294	0.0481269
chr16	65022838	ENSG00000140937	CDH11	0.516492	0.00187783	0.0162184
chr16	65025917	ENSG00000140937	CDH11	0.538013	0.00172391	0.00457413
chr16	65030212	ENSG00000140937	CDH11	0.523802	0.00415767	0.00718335
chr16	65052625	ENSG00000140937	CDH11	0.54027	0.00370536	0.00780826
chr16	65055620	ENSG00000140937	CDH11	0.511549	0.00187884	0.00402583
chr16	65057500	ENSG00000140937	CDH11	0.506185	0.00178618	0.0226347
chr16	65074166	ENSG00000140937	CDH11	0.50383	0.0028842	0.030647
chr16	65105437	ENSG00000140937	CDH11	0.581844	0.00179846	0.0406809
chr16	65115035	ENSG00000140937	CDH11	0.581215	0.00718976	0.0690035
chr16	69433150	ENSG00000103018	CYB5B	0.52601	0.00429132	0.0333844
chr16	69464650	ENSG00000103018	CYB5B	0.997635	0.995617	0.00586253
chr16	69465566	ENSG00000103018	CYB5B	0.786319	0.977779	0.0258127
chr16	69466672	ENSG00000103018	CYB5B	0.717582	0.00514911	0.0486636
chr16	709813	ENSG00000103260	METRN	0.565805	0.0141458	0.0695989
chr16	714090	ENSG00000103260	METRN	0.520712	0.00330242	0.0338165
chr16	715463	ENSG00000103260	METRN	0.504584	0.00502318	0.0241434
chr16	715479	ENSG00000103260	METRN	0.535695	0.00530732	0.030899
chr16	716572	ENSG00000103260	METRN	0.532353	0.000326411	0.0582974
chr16	717460	ENSG00000103260	METRN	0.681652	0.363642	0.125728
chr16	719203	ENSG00000103260	METRN	0.657553	0.00123134	0.020569
chr16	720148	ENSG00000103260	METRN	0.504718	0.0025153	0.0388937
chr16	720347	ENSG00000103260	METRN	0.694608	0.00399916	0.0290136
chr16	721121	ENSG00000103260	METRN	0.527511	0.0383797	0.0554376
chr16	722600	ENSG00000103260	METRN	0.748191	0.00461759	0.0190831
chr16	726597	ENSG00000103260	METRN	0.546676	0.000438744	0.0168421
chr16	726638	ENSG00000103260	METRN	0.519905	0.000758961	0.0290152
chr16	85235845	ENSG00000131149	GSE1	0.509412	0.00635114	0.0101672
chr16	85676181	ENSG00000131149	GSE1	0.995898	0.150439	0.00441235
chr16	88850327	ENSG00000167515	TRAPPC2L	0.532277	0.00286231	0.00294398
chr16	88851675	ENSG00000167515	TRAPPC2L	0.504109	0.0294157	0.00308714
chr16	88853935	ENSG00000167515	TRAPPC2L	0.547585	0.000851384	0.00263112
chr16	88854141	ENSG00000167515	TRAPPC2L	0.628426	0.00149567	0.00441318
chr16	88854270	ENSG00000167515	TRAPPC2L	0.590807	0.0149214	0.00290775
chr16	88854713	ENSG00000167515	TRAPPC2L	0.546627	0.00230657	0.00380347
chr16	88855075	ENSG00000167515	TRAPPC2L	0.521729	0.00133108	0.0185828
chr16	88861002	ENSG00000167515	TRAPPC2L	0.617613	0.00367665	0.0039307
chr16	88863359	ENSG00000167515	TRAPPC2L	0.997468	0.0899444	0.00956947
chr16	88864220	ENSG00000167515	TRAPPC2L	0.518451	0.0033117	0.00502383
chr16	88865738	ENSG00000167515	TRAPPC2L	0.52872	0.00282292	0.00537104
chr16	88868117	ENSG00000167515	TRAPPC2L	0.516549	0.00415563	0.0338609
chr16	89100473	ENSG00000176715	ACSF3	0.563073	0.00301856	0.00657143
chr16	89115462	ENSG00000176715	ACSF3	0.501613	0.0035885	0.00195818
chr16	89123485	ENSG00000176715	ACSF3	0.551893	0.00294972	0.00333809
chr16	89154744	ENSG00000176715	ACSF3	0.630152	0.00256106	0.00450816
chr16	89158933	ENSG00000176715	ACSF3	0.541404	0.00294609	0.00369407
chr16	89550934	ENSG00000167526	RPL13	0.512459	0.00297427	0.00480783
chr16	89559644	ENSG00000167526	RPL13	0.509382	0.00333539	0.00368113
chr16	89566017	ENSG00000167526	RPL13	0.528383	0.00180432	0.00601599
chr16	89571249	ENSG00000167526	RPL13	0.521164	0.00908833	0.0070215
chr16	89574435	ENSG00000167526	RPL13	0.506697	0.00504617	0.00629231
chr16	90008754	ENSG00000223959	AFG3L1P	0.573806	0.0330409	0.0228098
chr17	27308689	ENSG00000109046	WSB1	0.564973	0.00412861	0.0127054
chr17	29071992	ENSG00000196535	MYO18A	0.519826	0.00246738	0.00373335
chr17	29073751	ENSG00000196535	MYO18A	0.539234	0.00286911	0.00417566
chr17	29077731	ENSG00000196535	MYO18A	0.705623	0.025723	0.0131796
chr17	29092076	ENSG00000196535	MYO18A	0.558779	0.00791857	0.0100155
chr17	29133014	ENSG00000196535	MYO18A	0.536678	0.00130256	0.00411928
chr17	29138646	ENSG00000196535	MYO18A	0.521499	0.0028137	0.00735687
chr17	29149921	ENSG00000196535	MYO18A	0.566539	0.00434762	0.0377383
chr17	29163308	ENSG00000196535	MYO18A	0.564615	0.00275405	0.00592129
chr17	29166695	ENSG00000196535	MYO18A	0.535254	0.0153013	0.0464419
chr17	29166728	ENSG00000196535	MYO18A	0.540886	0.0195773	0.0461188
chr17	32139175	ENSG00000214708	AC090616.2	0.515818	0.0692393	0.0477568
chr17	32152945	ENSG00000214708	AC090616.2	0.555988	0.012094	0.0187404
chr17	3810393	ENSG00000074356	NCBP3	0.654208	0.00632573	0.0456028
chr17	41943430	ENSG00000204815	TTC25	0.713292	0.00828799	0.0231279
chr17	44909294	ENSG00000131095	GFAP	0.666509	0.00463218	0.00655287
chr17	44925960	ENSG00000131095	GFAP	0.595104	0.00370916	0.027423
chr17	49780180	ENSG00000136504	KAT7	0.568205	0.00701245	0.0477326
chr17	49783555	ENSG00000136504	KAT7	0.53146	0.00364653	0.0342372
chr17	49795939	ENSG00000136504	KAT7	0.684842	0.00280888	0.0187719
chr17	49799520	ENSG00000136504	KAT7	0.515614	0.00287684	0.0234386
chr17	49814589	ENSG00000136504	KAT7	0.502269	0.00211361	0.0304222
chr17	49827846	ENSG00000136504	KAT7	0.667706	0.0083895	0.0507631
chr17	49828736	ENSG00000136504	KAT7	0.678107	0.00960605	0.0645991
chr17	49832282	ENSG00000136504	KAT7	0.581086	0.00334473	0.0229976
chr17	49834670	ENSG00000136504	KAT7	0.585311	0.0041232	0.0281143
chr17	49842259	ENSG00000136504	KAT7	0.503906	0.0023488	0.0149293
chr17	49842454	ENSG00000136504	KAT7	0.501848	0.00233727	0.0170499
chr17	517668	ENSG00000141252	VPS53	0.516918	0.00355227	0.0127081
chr17	544319	ENSG00000141252	VPS53	0.518236	0.00391305	0.0250179
chr17	58510623	ENSG00000108387	2023-09-04	0.564753	0.00408448	0.00381102
chr17	58510875	ENSG00000108387	2023-09-04	0.5477	0.00289387	0.00307554
chr17	58518039	ENSG00000108387	2023-09-04	0.500706	0.0659572	0.00439389
chr17	58535487	ENSG00000108387	2023-09-04	0.526973	0.00128026	0.0555914
chr17	597496	ENSG00000141252	VPS53	0.526985	0.00322797	0.0219299
chr17	620402	ENSG00000141252	VPS53	0.55522	0.00289115	0.0239254
chr17	64311018	ENSG00000261371	PECAM1	0.505217	0.00473593	0.00593664
chr17	64320394	ENSG00000261371	PECAM1	0.669201	0.00208485	0.00535069
chr17	64320453	ENSG00000261371	PECAM1	0.649309	0.00152564	0.00402325
chr17	64320856	ENSG00000261371	PECAM1	0.615747	0.00213102	0.0035935
chr17	64324440	ENSG00000261371	PECAM1	0.521907	0.00164109	0.00390357
chr17	64327671	ENSG00000261371	PECAM1	0.568578	0.00186001	0.00495627
chr17	64328341	ENSG00000261371	PECAM1	0.567509	0.00149236	0.00450958
chr17	64328582	ENSG00000261371	PECAM1	0.590607	0.00220449	0.00664499
chr17	64328973	ENSG00000261371	PECAM1	0.54911	0.00145749	0.0823806
chr17	64334430	ENSG00000261371	PECAM1	0.584985	0.00152771	0.00475197
chr17	64336191	ENSG00000261371	PECAM1	0.571464	0.00242381	0.00319521
chr17	64336235	ENSG00000261371	PECAM1	0.557199	0.00192257	0.00325498
chr17	64338385	ENSG00000261371	PECAM1	0.526386	0.00278594	0.00474278
chr17	64339294	ENSG00000261371	PECAM1	0.552186	0.00175064	0.00358771
chr17	64341463	ENSG00000261371	PECAM1	0.580206	0.00129515	0.00282689
chr17	64341918	ENSG00000261371	PECAM1	0.574601	0.0194978	0.00349569
chr17	64351669	ENSG00000261371	PECAM1	0.520575	0.00308567	0.111841
chr17	64354716	ENSG00000261371	PECAM1	0.557804	0.00231214	0.00565031
chr17	64355982	ENSG00000261371	PECAM1	0.583492	0.00296208	0.00834064
chr17	64356406	ENSG00000261371	PECAM1	0.700692	0.0694603	0.643471
chr17	64369913	ENSG00000261371	PECAM1	0.551732	0.00409078	0.0462762
chr17	64382067	ENSG00000261371	PECAM1	0.503031	0.000692165	0.00384859
chr17	64385220	ENSG00000261371	PECAM1	0.507932	0.00203695	0.00486931
chr17	64388703	ENSG00000261371	PECAM1	0.518634	0.0014677	0.00307643
chr17	64392507	ENSG00000261371	PECAM1	0.534312	0.00205694	0.00403743
chr17	64392731	ENSG00000261371	PECAM1	0.593751	0.00435864	0.00901839
chr17	64393297	ENSG00000261371	PECAM1	0.560496	0.00177594	0.00362116
chr17	64393333	ENSG00000261371	PECAM1	0.54736	0.00192423	0.00309896
chr17	64394183	ENSG00000261371	PECAM1	0.529332	0.00409741	0.1059
chr17	64397069	ENSG00000261371	PECAM1	0.55434	0.00228992	0.00710918
chr17	64397891	ENSG00000261371	PECAM1	0.518015	0.00146717	0.00411531
chr17	64398597	ENSG00000261371	PECAM1	0.605427	0.00183406	0.00872246
chr17	64399071	ENSG00000261371	PECAM1	0.529248	0.00150026	0.00477951
chr17	64400685	ENSG00000261371	PECAM1	0.548813	0.027756	0.00662177
chr17	64401535	ENSG00000261371	PECAM1	0.61212	0.00071647	0.00413487
chr17	64405400	ENSG00000261371	PECAM1	0.563908	0.00135488	0.00343031
chr17	64406342	ENSG00000261371	PECAM1	0.61826	0.00172677	0.00475839
chr17	64419497	ENSG00000261371	PECAM1	0.500781	0.0022028	0.00548638
chr17	652048	ENSG00000141252	VPS53	0.568165	0.00325829	0.0171315
chr17	652974	ENSG00000141252	VPS53	0.592496	0.0032181	0.0221445
chr17	706123	ENSG00000141252	VPS53	0.527292	0.00223155	0.0211694
chr17	719837	ENSG00000141252	VPS53	0.511663	0.00264969	0.0215815
chr17	75661328	ENSG00000161526	SAP30BP	0.516025	0.0340491	0.0291228
chr17	75673803	ENSG00000161526	SAP30BP	0.522168	0.00253597	0.0258796
chr17	75684346	ENSG00000161526	SAP30BP	0.584145	0.000978443	0.0188553
chr17	75685256	ENSG00000161526	SAP30BP	0.614446	0.00382178	0.0441744
chr17	75694696	ENSG00000161526	SAP30BP	0.511661	0.00145872	0.00977404
chr17	75696304	ENSG00000161526	SAP30BP	0.527674	0.00263711	0.00364177
chr17	75697195	ENSG00000161526	SAP30BP	0.561919	0.00508171	0.042815
chr17	75715748	ENSG00000161526	SAP30BP	0.520619	0.0644746	0.00574901
chr17	76264677	ENSG00000129646	QRICH2	0.536233	0.0046377	0.0372666
chr17	76266782	ENSG00000129646	QRICH2	0.651736	0.00390597	0.084267
chr17	76285619	ENSG00000129646	QRICH2	0.504835	0.0034775	0.0203236
chr17	76289606	ENSG00000129646	QRICH2	0.6949	0.00308824	0.0151325
chr17	76298740	ENSG00000129646	QRICH2	0.506705	0.00369767	0.0159053
chr17	76299916	ENSG00000129646	QRICH2	0.511024	0.00282963	0.0135818
chr17	76304178	ENSG00000129646	QRICH2	0.506792	0.00246088	0.0245859
chr17	76308101	ENSG00000129646	QRICH2	0.506096	0.0183759	0.039927
chr17	76309624	ENSG00000129646	QRICH2	0.585597	0.00276157	0.0175964
chr17	76309666	ENSG00000129646	QRICH2	0.617891	0.00313634	0.0205483
chr17	76310422	ENSG00000129646	QRICH2	0.567743	0.00318691	0.0179164
chr17	76311391	ENSG00000129646	QRICH2	0.997295	0.0530202	0.00644997
chr17	76666822	ENSG00000182534	MXRA7	0.503363	0.00298951	0.00709259
chr17	76673608	ENSG00000182534	MXRA7	0.784483	0.0415933	0.0034573
chr17	76676930	ENSG00000182534	MXRA7	0.505984	0.00307981	0.00344146
chr17	76677552	ENSG00000182534	MXRA7	0.543237	0.00248396	0.00427446
chr17	76677779	ENSG00000182534	MXRA7	0.500842	0.00154262	0.00332276
chr17	76681415	ENSG00000182534	MXRA7	0.578118	0.00678192	0.0099108
chr17	76681647	ENSG00000182534	MXRA7	0.519658	0.00129845	0.00460459
chr17	76688077	ENSG00000182534	MXRA7	0.530166	0.0224253	0.00330221
chr17	76688751	ENSG00000182534	MXRA7	0.571722	0.0327377	0.0219628
chr17	76689571	ENSG00000182534	MXRA7	0.512574	0.00645026	0.00934527
chr17	76689575	ENSG00000182534	MXRA7	0.545677	0.00609856	0.00998316
chr17	76690256	ENSG00000182534	MXRA7	0.507064	0.00179063	0.00453289
chr17	76692849	ENSG00000182534	MXRA7	0.531944	0.00125256	0.00405896
chr17	76697678	ENSG00000182534	MXRA7	0.518074	0.00109878	0.00427952
chr17	76699011	ENSG00000182534	MXRA7	0.530561	0.00151434	0.00334089
chr17	76709658	ENSG00000182534	MXRA7	0.515193	0.0602897	0.00765641
chr17	76710319	ENSG00000182534	MXRA7	0.556976	0.00205076	0.0103023
chr17	76712844	ENSG00000182534	MXRA7	0.629819	0.00708903	0.00693446
chr17	76712980	ENSG00000182534	MXRA7	0.624953	0.00310822	0.0259497
chr17	76713342	ENSG00000182534	MXRA7	0.59055	0.00257797	0.00354137
chr17	76714087	ENSG00000182534	MXRA7	0.591326	0.00266508	0.00484644
chr17	76717381	ENSG00000182534	MXRA7	0.518146	0.00172799	0.00454581
chr17	76718054	ENSG00000182534	MXRA7	0.518056	0.0556329	0.00646699
chr17	76720789	ENSG00000182534	MXRA7	0.51534	0.00320679	0.12213
chr17	81049009	ENSG00000175866	BAIAP2	0.584461	0.00152786	0.0030805
chr17	81090090	ENSG00000175866	BAIAP2	0.548696	0.00184057	0.00348015
chr17	81090623	ENSG00000175866	BAIAP2	0.579618	0.00108596	0.0023042
chr17	81900237	ENSG00000141552	ANAPC11	0.950947	0.999078	0.00194089
chr17	82237963	ENSG00000141551	CSNK1D	0.580716	0.000220331	0.015501
chr17	82238841	ENSG00000141551	CSNK1D	0.592986	0.726209	0.00090365
chr17	82239077	ENSG00000141551	CSNK1D	0.605041	0.0027181	0.011006
chr17	82239954	ENSG00000141551	CSNK1D	0.623387	0.000288542	0.0216059
chr17	82244328	ENSG00000141551	CSNK1D	0.595831	0.00515685	0.0326678
chr17	82524689	ENSG00000141568	FOXK2	0.504702	0.00061889	0.0203314
chr17	82534369	ENSG00000141568	FOXK2	0.529253	0.000958961	0.019871
chr17	82543620	ENSG00000141568	FOXK2	0.52328	0.0017282	0.0251954
chr17	82561604	ENSG00000141568	FOXK2	0.539463	0.0017195	0.0225612
chr17	82566812	ENSG00000141568	FOXK2	0.502346	0.00170864	0.0133012
chr17	82602742	ENSG00000141568	FOXK2	0.63264	0.00247041	0.0126947
chr17	82602783	ENSG00000141568	FOXK2	0.604053	0.00209326	0.0116164
chr17	82603558	ENSG00000141568	FOXK2	0.627538	0.00202791	0.0131252
chr17	82604048	ENSG00000141568	FOXK2	0.574843	0.00280074	0.0122463
chr18	42009497	ENSG00000078142	PIK3C3	0.505927	0.00301807	0.00627176
chr18	42032372	ENSG00000078142	PIK3C3	0.503319	0.0021017	0.00493925
chr18	42039615	ENSG00000078142	PIK3C3	0.525779	0.00198788	0.00558782
chr18	49853648	ENSG00000267322	SNHG22	0.735236	0.962581	0.996399
chr18	74489563	ENSG00000133313	CNDP2	0.511049	0.00240735	0.0353646
chr18	74501366	ENSG00000133313	CNDP2	0.659369	0.0121623	0.114067
chr18	74510510	ENSG00000133313	CNDP2	0.507853	0.00348347	0.0178075
chr18	74590147	ENSG00000264247	LINC00909	0.500541	0.001774	0.00691111
chr18	74595129	ENSG00000264247	LINC00909	0.579838	0.0017685	0.00579778
chr18	74596209	ENSG00000264247	LINC00909	0.57076	0.00149864	0.00559608
chr18	9137603	ENSG00000101745	ANKRD12	0.530334	0.0651389	0.0201786
chr18	9138349	ENSG00000101745	ANKRD12	0.542022	0.00270896	0.00417328
chr18	9138684	ENSG00000101745	ANKRD12	0.635719	0.0047631	0.0178286
chr18	9140186	ENSG00000101745	ANKRD12	0.514651	0.00168553	0.00671548
chr18	9141620	ENSG00000101745	ANKRD12	0.541169	0.00254182	0.00823469
chr18	9142305	ENSG00000101745	ANKRD12	0.535148	0.00304562	0.00910042
chr18	9146692	ENSG00000101745	ANKRD12	0.518052	0.00110774	0.00530526
chr18	9149027	ENSG00000101745	ANKRD12	0.513985	0.000695213	0.00386922
chr18	9150134	ENSG00000101745	ANKRD12	0.522341	0.00179446	0.00542287
chr18	9156381	ENSG00000101745	ANKRD12	0.503162	0.00196332	0.00513682
chr18	9163993	ENSG00000101745	ANKRD12	0.520361	0.00147209	0.00304908
chr18	9164903	ENSG00000101745	ANKRD12	0.501941	0.0014765	0.00386341
chr18	9172712	ENSG00000101745	ANKRD12	0.514664	0.00299875	0.0062144
chr18	9185751	ENSG00000101745	ANKRD12	0.509765	0.00204995	0.00383956
chr18	9194778	ENSG00000101745	ANKRD12	0.504607	0.0056099	0.00788855
chr18	9211614	ENSG00000101745	ANKRD12	0.560164	0.0189389	0.101445
chr18	9215796	ENSG00000101745	ANKRD12	0.562258	0.00510743	0.00726379
chr18	9228621	ENSG00000101745	ANKRD12	0.500093	0.00488087	0.00703435
chr18	9239608	ENSG00000101745	ANKRD12	0.543909	0.00684937	0.0104534
chr18	9257232	ENSG00000101745	ANKRD12	0.552363	0.0162824	0.0839641
chr18	9258090	ENSG00000101745	ANKRD12	0.535627	0.0149838	0.0916907
chr18	9281852	ENSG00000101745	ANKRD12	0.655523	0.00717561	0.0100042
chr18	9282584	ENSG00000101745	ANKRD12	0.577292	0.00544908	0.00688547
chr19	1237897	ENSG00000099624	ATP5D	0.588795	0.0885333	0.0661629
chr19	1250569	ENSG00000099624	ATP5D	0.593776	0.01081	0.0424647
chr19	1250613	ENSG00000099624	ATP5D	0.591678	0.0127733	0.0262981
chr19	1258229	ENSG00000099622	CIRBP	0.575017	0.00415771	0.0232506
chr19	1273208	ENSG00000099622	CIRBP	0.538919	0.00227224	0.0103732
chr19	1274823	ENSG00000099622	CIRBP	0.565052	0.000785447	0.00323044
chr19	12954187	ENSG00000179271	GADD45GIP1	0.998189	0.999234	0.00258945
chr19	1452530	ENSG00000119559	C19orf25	0.531976	0.00824022	0.0728034
chr19	1461949	ENSG00000119559	C19orf25	0.501022	0.0026462	0.00412704
chr19	1464693	ENSG00000119559	C19orf25	0.501433	0.00219029	0.00345445
chr19	1465955	ENSG00000119559	C19orf25	0.647963	0.00444746	0.254192
chr19	1468864	ENSG00000119559	C19orf25	0.52087	0.00358909	0.0355545
chr19	1472127	ENSG00000119559	C19orf25	0.670252	0.000648473	0.0257566
chr19	1473045	ENSG00000119559	C19orf25	0.615936	0.00124214	0.003743
chr19	1476125	ENSG00000119559	C19orf25	0.572017	0.00180414	0.0042465
chr19	1477971	ENSG00000119559	C19orf25	0.51738	0.00184397	0.00395318
chr19	1483120	ENSG00000119559	C19orf25	0.532112	0.00293743	0.00326529
chr19	1488914	ENSG00000119559	C19orf25	0.553094	0.00289631	0.00415896
chr19	16317037	ENSG00000127528	KLF2	0.540303	0.00143521	0.0034435
chr19	16325142	ENSG00000127528	KLF2	0.543786	0.00917822	0.00821587
chr19	16334266	ENSG00000127528	KLF2	0.509963	0.00185935	0.00475198
chr19	16334941	ENSG00000127528	KLF2	0.522625	0.00284375	0.00557427
chr19	16335363	ENSG00000127528	KLF2	0.511875	0.00347081	0.0072644
chr19	16335631	ENSG00000127528	KLF2	0.533323	0.00335628	0.00571251
chr19	16336988	ENSG00000127528	KLF2	0.531283	0.0020989	0.00475562
chr19	16337634	ENSG00000127528	KLF2	0.54743	0.00374433	0.00914871
chr19	17581710	ENSG00000130309	COLGALT1	0.682317	0.487167	0.00455817
chr19	19170252	ENSG00000254901	BORCS8	0.574687	0.0293662	0.0107788
chr19	19172193	ENSG00000254901	BORCS8	0.609016	0.00847809	0.0459475
chr19	19269565	ENSG00000105705	SUGP1	0.506507	0.00247893	0.00477262
chr19	19276533	ENSG00000105705	SUGP1	0.998093	0.13528	0.00881646
chr19	19277095	ENSG00000105705	SUGP1	0.56204	0.0048136	0.0257666
chr19	3293770	ENSG00000161082	CELF5	0.500358	0.00669428	0.0435277
chr19	34371663	ENSG00000105220	GPI	0.502026	0.00244191	0.0199713
chr19	34390079	ENSG00000105220	GPI	0.596104	0.00373291	0.0335878
chr19	34390594	ENSG00000105220	GPI	0.54415	0.00251397	0.0255442
chr19	34394052	ENSG00000105220	GPI	0.663856	0.0326457	0.5503
chr19	34483380	ENSG00000142279	WTIP	0.616758	0.00135324	0.0354268
chr19	34485545	ENSG00000142279	WTIP	0.522074	0.0018578	0.0275162
chr19	34489432	ENSG00000142279	WTIP	0.566341	0.00139459	0.0331821
chr19	35734181	ENSG00000126246	IGFLR1	0.563628	0.0035297	0.00791782
chr19	35735135	ENSG00000126246	IGFLR1	0.527685	0.00332706	0.00730989
chr19	35739339	ENSG00000126246	IGFLR1	0.566226	0.00968191	0.0852898
chr19	35740099	ENSG00000126246	IGFLR1	0.500425	0.00144371	0.00541885
chr19	35742818	ENSG00000126246	IGFLR1	0.503118	0.00267609	0.00844436
chr19	35746268	ENSG00000126246	IGFLR1	0.547192	0.00175361	0.00678396
chr19	35879739	ENSG00000167604	NFKBID	0.83853	0.00583501	0.00774643
chr19	48479241	ENSG00000105443	CYTH2	0.616047	0.538391	0.0087798
chr19	48480211	ENSG00000105443	CYTH2	0.635201	0.266942	0.00376893
chr19	48489070	ENSG00000105443	CYTH2	0.54744	0.273738	0.00427517
chr19	49099862	ENSG00000104852	SNRNP70	0.514619	0.00217957	0.00387035
chr19	49104848	ENSG00000104863	LIN7B	0.500439	0.00205398	0.0833657
chr19	49106628	ENSG00000104863	LIN7B	0.516444	0.00185196	0.0759168
chr19	49113396	ENSG00000104863	LIN7B	0.528337	0.00269288	0.103804
chr19	49116304	ENSG00000104852	SNRNP70	0.627184	0.00992578	0.0545822
chr19	49116504	ENSG00000104863	LIN7B	0.599867	0.00191668	0.102555
chr19	49116821	ENSG00000104863	LIN7B	0.552237	0.00497369	0.149534
chr19	49117465	ENSG00000104863	LIN7B	0.504908	0.00194598	0.0253711
chr19	49119617	ENSG00000104863	LIN7B	0.607813	0.0334713	0.0157636
chr19	49124023	ENSG00000104863	LIN7B	0.503671	0.00576579	0.168442
chr19	49127843	ENSG00000104863	LIN7B	0.621746	0.00537064	0.0941408
chr19	49491821	ENSG00000142541	RPL13A	0.998345	0.148131	0.0175749
chr19	49492294	ENSG00000142541	RPL13A	0.843756	0.0101666	0.0085515
chr19	49492368	ENSG00000142541	RPL13A	0.605187	0.00226439	0.0049295
chr19	49498384	ENSG00000142541	RPL13A	0.747843	0.00149707	0.00476897
chr19	52274412	ENSG00000196214	ZNF766	0.682349	0.00159977	0.0192013
chr19	52289872	ENSG00000196214	ZNF766	0.518573	0.00311669	0.0149972
chr19	52296237	ENSG00000196214	ZNF766	0.530864	0.00248711	0.0180881
chr19	52305402	ENSG00000196214	ZNF766	0.515852	0.00241674	0.0141026
chr19	52305827	ENSG00000196214	ZNF766	0.512383	0.00273082	0.0106049
chr19	54575951	ENSG00000239998	LILRA2	0.588567	0.000692564	0.0835644
chr19	54575956	ENSG00000239998	LILRA2	0.70372	0.0745578	0.970855
chr19	54575962	ENSG00000239998	LILRA2	0.511127	0.000844723	0.0846466
chr19	54575996	ENSG00000239998	LILRA2	0.672213	0.00158913	0.194953
chr19	54576021	ENSG00000239998	LILRA2	0.574443	0.000818109	0.0809339
chr19	54576023	ENSG00000239998	LILRA2	0.602745	0.000688887	0.10629
chr19	54576039	ENSG00000239998	LILRA2	0.624056	0.00108903	0.0794514
chr19	54576061	ENSG00000239998	LILRA2	0.678234	0.00247154	0.19675
chr19	54576395	ENSG00000239998	LILRA2	0.51654	0.00216326	0.0173272
chr19	54577277	ENSG00000239998	LILRA2	0.544386	0.00138749	0.0199956
chr19	54577279	ENSG00000239998	LILRA2	0.548795	0.00145013	0.0222674
chr19	54577292	ENSG00000239998	LILRA2	0.585131	0.00166756	0.0260615
chr19	54577300	ENSG00000239998	LILRA2	0.586244	0.00145533	0.0245986
chr19	54577330	ENSG00000239998	LILRA2	0.527666	0.00105776	0.0172855
chr19	54577331	ENSG00000239998	LILRA2	0.535438	0.00113048	0.0183942
chr19	54577333	ENSG00000239998	LILRA2	0.533478	0.00116742	0.018696
chr19	54577406	ENSG00000239998	LILRA2	0.572102	0.000710236	0.0217029
chr19	54577407	ENSG00000239998	LILRA2	0.551828	0.000698067	0.0205233
chr19	54577410	ENSG00000239998	LILRA2	0.507304	0.000611651	0.0155618
chr19	54577434	ENSG00000239998	LILRA2	0.590349	0.000806698	0.0182757
chr19	54577436	ENSG00000239998	LILRA2	0.551616	0.000962429	0.0190571
chr19	54577468	ENSG00000239998	LILRA2	0.584354	0.00117506	0.107266
chr19	54577475	ENSG00000239998	LILRA2	0.544417	0.000999764	0.0843779
chr19	54577478	ENSG00000239998	LILRA2	0.600427	0.00126056	0.113574
chr19	54577484	ENSG00000239998	LILRA2	0.501585	0.00169754	0.0688766
chr19	54577491	ENSG00000239998	LILRA2	0.606592	0.00155687	0.120623
chr19	54577517	ENSG00000239998	LILRA2	0.555475	0.00196553	0.0847607
chr19	54577519	ENSG00000239998	LILRA2	0.532276	0.00152648	0.107133
chr19	54577523	ENSG00000239998	LILRA2	0.560957	0.00234476	0.0892283
chr19	54577539	ENSG00000239998	LILRA2	0.53429	0.00160149	0.0955458
chr19	54577579	ENSG00000239998	LILRA2	0.539334	0.00165068	0.103358
chr19	54577603	ENSG00000239998	LILRA2	0.555537	0.00201527	0.106869
chr19	54577610	ENSG00000239998	LILRA2	0.517387	0.00218088	0.0783499
chr19	54577629	ENSG00000239998	LILRA2	0.53811	0.00147785	0.0940478
chr19	54586441	ENSG00000239998	LILRA2	0.523251	0.00140524	0.0233983
chr19	54586447	ENSG00000239998	LILRA2	0.536769	0.0011347	0.0211525
chr19	54586450	ENSG00000239998	LILRA2	0.500966	0.00115417	0.0203865
chr19	54586617	ENSG00000239998	LILRA2	0.559469	0.00104076	0.01917
chr19	54586618	ENSG00000239998	LILRA2	0.58752	0.00128122	0.02218
chr19	54586654	ENSG00000239998	LILRA2	0.597672	0.00203136	0.0261953
chr19	54586672	ENSG00000239998	LILRA2	0.575967	0.00204933	0.0270032
chr19	54586679	ENSG00000239998	LILRA2	0.571735	0.00201701	0.0264181
chr19	54586692	ENSG00000239998	LILRA2	0.53977	0.00137702	0.0219887
chr19	54586693	ENSG00000239998	LILRA2	0.572307	0.00197762	0.0287647
chr19	54586734	ENSG00000239998	LILRA2	0.54974	0.00158276	0.0258978
chr19	54586741	ENSG00000239998	LILRA2	0.520586	0.0013179	0.0220373
chr19	54586758	ENSG00000239998	LILRA2	0.506455	0.00147136	0.0228114
chr19	54586781	ENSG00000239998	LILRA2	0.541158	0.00141508	0.0243122
chr19	54586877	ENSG00000239998	LILRA2	0.557783	0.00180662	0.0259276
chr19	54586906	ENSG00000239998	LILRA2	0.531196	0.00168136	0.0218824
chr19	54587075	ENSG00000239998	LILRA2	0.541879	0.00115281	0.0193194
chr19	54587150	ENSG00000239998	LILRA2	0.580235	0.00154761	0.0200132
chr19	54587166	ENSG00000239998	LILRA2	0.52578	0.00138275	0.017134
chr19	54587205	ENSG00000239998	LILRA2	0.523759	0.00363827	0.0858754
chr19	54587213	ENSG00000239998	LILRA2	0.523762	0.00409403	0.12117
chr19	54587219	ENSG00000239998	LILRA2	0.5151	0.00418214	0.13929
chr19	54587228	ENSG00000239998	LILRA2	0.628097	0.0131184	0.262385
chr19	54587367	ENSG00000239998	LILRA2	0.51	0.00261551	0.015702
chr19	54587387	ENSG00000239998	LILRA2	0.589311	0.00236172	0.020554
chr19	54587441	ENSG00000239998	LILRA2	0.585667	0.00230649	0.0219092
chr19	54587455	ENSG00000239998	LILRA2	0.633546	0.00224542	0.025572
chr19	54587478	ENSG00000239998	LILRA2	0.585061	0.00200776	0.0232854
chr19	54587495	ENSG00000239998	LILRA2	0.632438	0.00205709	0.0232516
chr19	54587497	ENSG00000239998	LILRA2	0.639089	0.00254828	0.0247466
chr19	54587540	ENSG00000239998	LILRA2	0.78401	0.00320853	0.0162704
chr19	54587552	ENSG00000239998	LILRA2	0.682513	0.0040728	0.0122654
chr19	54587570	ENSG00000239998	LILRA2	0.525659	0.00251029	0.0165465
chr19	54587584	ENSG00000239998	LILRA2	0.680141	0.00310391	0.0247959
chr19	54587586	ENSG00000239998	LILRA2	0.637033	0.0019641	0.0189001
chr19	54587589	ENSG00000239998	LILRA2	0.618851	0.00215588	0.0191804
chr19	54587626	ENSG00000239998	LILRA2	0.684582	0.00204116	0.01949
chr19	54587658	ENSG00000239998	LILRA2	0.678403	0.00242544	0.0197394
chr19	54587670	ENSG00000239998	LILRA2	0.670393	0.00218705	0.0167358
chr19	54587723	ENSG00000239998	LILRA2	0.576616	0.00203013	0.0173465
chr19	54587784	ENSG00000239998	LILRA2	0.551481	0.00196869	0.0194652
chr19	54587810	ENSG00000239998	LILRA2	0.60027	0.00175921	0.0218185
chr19	54587814	ENSG00000239998	LILRA2	0.552994	0.00149677	0.0194254
chr19	54587840	ENSG00000239998	LILRA2	0.621885	0.00169251	0.0212851
chr19	54587842	ENSG00000239998	LILRA2	0.638507	0.00162607	0.0222886
chr19	54587849	ENSG00000239998	LILRA2	0.560118	0.0018238	0.0206026
chr19	54587853	ENSG00000239998	LILRA2	0.648591	0.00224978	0.0264254
chr19	54587855	ENSG00000239998	LILRA2	0.592675	0.0015424	0.0185162
chr19	54587866	ENSG00000239998	LILRA2	0.542287	0.00159723	0.0201786
chr19	54587960	ENSG00000239998	LILRA2	0.607168	0.00252635	0.0234681
chr19	54587964	ENSG00000239998	LILRA2	0.619776	0.00287085	0.0257389
chr19	54587978	ENSG00000239998	LILRA2	0.55755	0.00202751	0.0184906
chr19	54587985	ENSG00000239998	LILRA2	0.599821	0.00211179	0.0223288
chr19	54587996	ENSG00000239998	LILRA2	0.610411	0.00235608	0.0232651
chr19	54588055	ENSG00000239998	LILRA2	0.622374	0.00193636	0.0192539
chr19	54588058	ENSG00000239998	LILRA2	0.58406	0.00221601	0.0186327
chr19	54588072	ENSG00000239998	LILRA2	0.659836	0.00260306	0.0235604
chr19	54588077	ENSG00000239998	LILRA2	0.635144	0.00201678	0.0188242
chr19	54588143	ENSG00000239998	LILRA2	0.684612	0.00226222	0.019825
chr19	54588191	ENSG00000239998	LILRA2	0.558505	0.00163393	0.013158
chr19	54588210	ENSG00000239998	LILRA2	0.555625	0.00246538	0.0166806
chr19	54589773	ENSG00000239998	LILRA2	0.658241	0.0020822	0.0131865
chr19	54595481	ENSG00000239998	LILRA2	0.511651	0.00286848	0.0232701
chr19	54595507	ENSG00000239998	LILRA2	0.535	0.00276068	0.0235553
chr19	54598398	ENSG00000239998	LILRA2	0.511546	0.00228917	0.0188151
chr19	55161881	ENSG00000129990	SYT5	0.527921	0.0021469	0.00981773
chr19	55182101	ENSG00000129990	SYT5	0.614586	0.0103569	0.0910848
chr19	57922281	ENSG00000196724	ZNF418	0.997518	0.0380856	0.00343579
chr19	57928887	ENSG00000196724	ZNF418	0.507574	0.00307742	0.0134741
chr19	57930040	ENSG00000196724	ZNF418	0.555289	0.00251267	0.0159468
chr19	853435	ENSG00000197766	CFD	0.519744	0.00247377	0.00298189
chr1	109391014	ENSG00000143106	PSMA5	0.539258	0.00253749	0.00691082
chr1	109392314	ENSG00000143106	PSMA5	0.640365	0.00305799	0.00927597
chr1	109399684	ENSG00000143106	PSMA5	0.590994	0.00433375	0.00858274
chr1	109400559	ENSG00000143106	PSMA5	0.566492	0.00303712	0.00484724
chr1	109401890	ENSG00000143106	PSMA5	0.833436	0.0154883	0.0137522
chr1	109402877	ENSG00000143106	PSMA5	0.511465	0.00420823	0.00406888
chr1	109425356	ENSG00000143106	PSMA5	0.553752	0.0141967	0.0264718
chr1	109733943	ENSG00000134202	GSTM3	0.787532	0.00660907	0.00450548
chr1	109734150	ENSG00000134202	GSTM3	0.613852	0.00525893	0.00627025
chr1	109734187	ENSG00000134202	GSTM3	0.636337	0.00580562	0.00651634
chr1	109734514	ENSG00000134202	GSTM3	0.593166	0.00423262	0.00590428
chr1	109735759	ENSG00000134202	GSTM3	0.541274	0.00444081	0.00338734
chr1	109736113	ENSG00000134202	GSTM3	0.557873	0.00334089	0.00489608
chr1	109736617	ENSG00000134202	GSTM3	0.995553	0.0382764	0.000735009
chr1	109736993	ENSG00000134202	GSTM3	0.997603	0.0954929	0.00197722
chr1	109748926	ENSG00000134202	GSTM3	0.501281	0.00312427	0.00376133
chr1	112674603	ENSG00000155363	MOV10	0.531499	0.140211	0.0848038
chr1	112701149	ENSG00000155363	MOV10	0.998622	0.0944667	0.00268942
chr1	112706598	ENSG00000155363	MOV10	0.544919	0.00568748	0.0151118
chr1	153561364	ENSG00000196754	S100A2	0.997767	0.113702	0.00216736
chr1	153561532	ENSG00000196754	S100A2	0.537614	0.0115707	0.054769
chr1	153567725	ENSG00000196754	S100A2	0.558371	0.00213226	0.00418282
chr1	153568897	ENSG00000196754	S100A2	0.533378	0.00701879	0.00912526
chr1	154545061	ENSG00000160714	UBE2Q1	0.544299	0.00306482	0.00563508
chr1	154547711	ENSG00000160714	UBE2Q1	0.559753	0.00219748	0.00346382
chr1	167918055	ENSG00000143158	MPC2	0.657796	0.00584968	0.00731938
chr1	182382913	ENSG00000135821	GLUL	0.997384	0.0691686	0.00217528
chr1	183619363	ENSG00000162704	ARPC5	0.511861	0.00166318	0.0225425
chr1	183623123	ENSG00000162704	ARPC5	0.604225	0.0027477	0.0267411
chr1	183624224	ENSG00000162704	ARPC5	0.574625	0.00318187	0.0136775
chr1	183626907	ENSG00000162704	ARPC5	0.594108	0.00317348	0.0435798
chr1	231353680	ENSG00000010072	SPRTN	0.557512	0.0461868	0.0182126
chr1	231353681	ENSG00000010072	SPRTN	0.61144	0.0578816	0.0201502
chr1	232952310	ENSG00000135778	NTPCR	0.532174	0.00300503	0.998147
chr1	232973349	ENSG00000135778	NTPCR	0.506819	0.00238564	0.00355691
chr1	232986481	ENSG00000135778	NTPCR	0.59455	0.0180683	0.999922
chr1	26894456	ENSG00000090273	NUDC	0.550112	0.00490157	0.00626281
chr1	26911685	ENSG00000090273	NUDC	0.51058	0.00280965	0.00690816
chr1	26923204	ENSG00000090273	NUDC	0.600605	0.000811011	0.0383385
chr1	26927763	ENSG00000090273	NUDC	0.514935	0.0021528	0.0243857
chr1	26937405	ENSG00000090273	NUDC	0.52616	0.00154743	0.00271965
chr1	26949710	ENSG00000090273	NUDC	0.573265	0.00231593	0.00402474
chr1	26951768	ENSG00000090273	NUDC	0.523488	0.00852034	0.225399
chr1	32775257	ENSG00000134684	YARS	0.964153	0.135605	0.00273967
chr1	39841068	ENSG00000043514	TRIT1	0.996637	0.999212	0.00173372
chr1	39881295	ENSG00000043514	TRIT1	0.555588	0.982303	0.0112929
chr1	48727860	ENSG00000162373	BEND5	0.630095	0.00861679	0.012112
chr1	54028150	ENSG00000116209	TMEM59	0.618644	0.00392689	0.0047875
chr1	54032310	ENSG00000116209	TMEM59	0.727719	0.271685	0.966449
chr1	54040030	ENSG00000116209	TMEM59	0.517018	0.00282715	0.0289246
chr1	54051651	ENSG00000116209	TMEM59	0.586312	0.00243187	0.0463409
chr1	78622521	ENSG00000137959	IFI44L	0.512765	0.339217	0.00614515
chr1	78630108	ENSG00000137959	IFI44L	0.523054	0.322213	0.00546631
chr1	78643597	ENSG00000137959	IFI44L	0.600477	0.410578	0.00478256
chr1	92184700	ENSG00000069712	KIAA1107	0.997946	0.670884	0.01617
chr1	94143399	ENSG00000137962	ARHGAP29	0.51708	0.0047973	0.00817457
chr1	94167267	ENSG00000137962	ARHGAP29	0.507883	0.00251361	0.00370672
chr1	94168920	ENSG00000137962	ARHGAP29	0.564824	0.00354451	0.00266111
chr1	94169429	ENSG00000137962	ARHGAP29	0.64159	0.00388901	0.00586986
chr1	94170471	ENSG00000137962	ARHGAP29	0.579121	0.00237311	0.0048813
chr1	94185797	ENSG00000137962	ARHGAP29	0.501661	0.0020633	0.00498564
chr1	94195952	ENSG00000137962	ARHGAP29	0.513536	0.00240685	0.0286713
chr1	94216284	ENSG00000137962	ARHGAP29	0.5031	0.00184764	0.00587667
chr1	94218586	ENSG00000137962	ARHGAP29	0.600504	0.00926044	0.0189524
chr1	94222136	ENSG00000137962	ARHGAP29	0.531106	0.00213558	0.0331767
chr1	94225488	ENSG00000137962	ARHGAP29	0.520503	0.00187444	0.00851526
chr1	94234036	ENSG00000137962	ARHGAP29	0.566374	0.000656535	0.00598757
chr1	94235240	ENSG00000137962	ARHGAP29	0.55164	0.000612163	0.00758677
chr1	94235440	ENSG00000137962	ARHGAP29	0.529253	0.000815016	0.00932274
chr1	94241322	ENSG00000137962	ARHGAP29	0.50437	0.00221168	0.00462263
chr1	94242389	ENSG00000137962	ARHGAP29	0.566207	0.00265288	0.00686916
chr1	94242930	ENSG00000137962	ARHGAP29	0.597771	0.00130697	0.00373114
chr1	94245401	ENSG00000137962	ARHGAP29	0.504143	0.00123398	0.0284475
chr1	94246319	ENSG00000137962	ARHGAP29	0.564228	0.00242547	0.0122214
chr1	94253697	ENSG00000137962	ARHGAP29	0.545388	0.00359023	0.00451923
chr1	94265006	ENSG00000137962	ARHGAP29	0.522867	0.00427903	0.00743784
chr1	94265131	ENSG00000137962	ARHGAP29	0.520477	0.00196671	0.00421325
chr1	94847373	ENSG00000143036	SLC44A3	0.508985	0.00222591	0.00401938
chr1	94895038	ENSG00000143036	SLC44A3	0.996569	0.0318032	0.000895937
chr1	99694356	ENSG00000099260	PALMD	0.997817	0.157311	0.00349952
chr20	10399449	ENSG00000125863	MKKS	0.512251	0.00499585	0.00943318
chr20	10403100	ENSG00000125863	MKKS	0.602478	0.002928	0.00398981
chr20	10404519	ENSG00000125863	MKKS	0.536459	0.00265708	0.00360063
chr20	10405201	ENSG00000125863	MKKS	0.780094	0.00450185	0.00479735
chr20	10405209	ENSG00000125863	MKKS	0.996553	0.0440048	0.00114554
chr20	10418609	ENSG00000125863	MKKS	0.531814	0.00270657	0.00629497
chr20	10433369	ENSG00000125863	MKKS	0.519647	0.0028857	0.00565895
chr20	35456615	ENSG00000126001	CEP250	0.500827	0.00130833	0.00468821
chr20	35462580	ENSG00000126001	CEP250	0.518382	0.00524318	0.00735512
chr20	35468175	ENSG00000126001	CEP250	0.569787	0.00221819	0.00365349
chr20	35475160	ENSG00000126001	CEP250	0.520868	0.00306445	0.00525739
chr20	35487082	ENSG00000126001	CEP250	0.510307	0.00329627	0.00528343
chr20	35495335	ENSG00000126001	CEP250	0.519237	0.00345703	0.00600841
chr20	35504385	ENSG00000126001	CEP250	0.537841	0.0106807	0.0674162
chr20	35513478	ENSG00000126001	CEP250	0.529796	0.00352818	0.0132947
chr20	35518487	ENSG00000126001	CEP250	0.617566	0.00345744	0.00439899
chr20	38208867	ENSG00000149633	KIAA1755	0.524961	0.00286088	0.0448062
chr20	38217532	ENSG00000149633	KIAA1755	0.555551	0.00259684	0.0358086
chr20	38226222	ENSG00000149633	KIAA1755	0.502898	0.00262397	0.0283495
chr20	38228337	ENSG00000149633	KIAA1755	0.553457	0.00325914	0.0282756
chr20	38236481	ENSG00000149633	KIAA1755	0.523911	0.00240192	0.023953
chr20	38246417	ENSG00000149633	KIAA1755	0.544501	0.00258927	0.0232008
chr20	38264228	ENSG00000149633	KIAA1755	0.506172	0.00231046	0.0197773
chr20	38269470	ENSG00000149633	KIAA1755	0.526162	0.00220573	0.0227124
chr20	46686662	ENSG00000172315	TP53RK	0.997527	0.0639806	0.0105942
chr20	50510406	ENSG00000196396	PTPN1	0.585727	0.108671	0.0215965
chr20	50518240	ENSG00000196396	PTPN1	0.502036	0.00121034	0.0246179
chr20	50520304	ENSG00000196396	PTPN1	0.536335	0.0292062	0.00385152
chr20	50522997	ENSG00000196396	PTPN1	0.53071	0.00288172	0.00599185
chr20	50553579	ENSG00000196396	PTPN1	0.530812	0.00190048	0.00455293
chr20	50556283	ENSG00000196396	PTPN1	0.549685	0.00209287	0.00515981
chr20	50559316	ENSG00000196396	PTPN1	0.517497	0.00206276	0.00461281
chr20	50562334	ENSG00000196396	PTPN1	0.589386	0.00142746	0.00480618
chr20	50578069	ENSG00000196396	PTPN1	0.508515	0.0307179	0.00522908
chr20	50581694	ENSG00000196396	PTPN1	0.804267	0.0139944	0.0144552
chr20	59028710	ENSG00000124172	ATP5E	0.998101	0.064215	0.0160335
chr20	62954222	ENSG00000101194	SLC17A9	0.517687	0.00327676	0.0042013
chr20	62959059	ENSG00000101194	SLC17A9	0.515331	0.00174073	0.0184391
chr20	62962428	ENSG00000101194	SLC17A9	0.560133	0.00216762	0.0180795
chr20	62968641	ENSG00000101194	SLC17A9	0.500193	0.0019113	0.0136639
chr20	63931205	ENSG00000198276	UCKL1	0.532245	0.00328443	0.00810665
chr20	63931941	ENSG00000198276	UCKL1	0.581595	0.00120827	0.00409581
chr20	63932318	ENSG00000198276	UCKL1	0.597562	0.0014634	0.00282774
chr20	63933786	ENSG00000198276	UCKL1	0.550524	0.00134776	0.00368556
chr20	63934358	ENSG00000198276	UCKL1	0.519823	0.000588702	0.00310042
chr20	63935153	ENSG00000198276	UCKL1	0.784296	0.00152719	0.00373939
chr20	63937022	ENSG00000198276	UCKL1	0.643147	0.00177015	0.00378219
chr20	63939021	ENSG00000198276	UCKL1	0.505985	0.00133501	0.00307788
chr20	63943166	ENSG00000198276	UCKL1	0.507637	0.000523721	0.00262478
chr20	63957048	ENSG00000198276	UCKL1	0.572874	0.00819261	0.0039124
chr20	63957690	ENSG00000198276	UCKL1	0.612169	0.00300352	0.00425397
chr20	63958488	ENSG00000198276	UCKL1	0.769935	0.00759327	0.00398121
chr21	32599965	ENSG00000159079	C21orf59	0.564237	0.00221389	0.0193128
chr21	33315372	ENSG00000142166	IFNAR1	0.507093	0.00262405	0.0087244
chr21	33330243	ENSG00000142166	IFNAR1	0.521621	0.00145334	0.00359809
chr21	33331374	ENSG00000142166	IFNAR1	0.539405	0.013924	0.0175821
chr21	33334798	ENSG00000142166	IFNAR1	0.55226	0.00307724	0.0123056
chr21	33340490	ENSG00000142166	IFNAR1	0.525886	0.000944799	0.0042988
chr21	33342399	ENSG00000142166	IFNAR1	0.527518	0.00261032	0.00523672
chr21	33342503	ENSG00000142166	IFNAR1	0.523085	0.00193325	0.00432143
chr21	33345012	ENSG00000142166	IFNAR1	0.500314	0.00277468	0.00376476
chr21	33347877	ENSG00000142166	IFNAR1	0.513975	0.00194087	0.00542558
chr21	33356137	ENSG00000142166	IFNAR1	0.568278	0.00285514	0.0162057
chr21	33356927	ENSG00000142166	IFNAR1	0.624613	0.00259937	0.00461144
chr21	33356936	ENSG00000142166	IFNAR1	0.635956	0.00247958	0.00506254
chr21	33357242	ENSG00000142166	IFNAR1	0.641369	0.00316195	0.0042269
chr21	33357617	ENSG00000142166	IFNAR1	0.576136	0.00304535	0.00328845
chr21	33365802	ENSG00000142166	IFNAR1	0.506834	0.00316077	0.00647832
chr21	33366549	ENSG00000142166	IFNAR1	0.570982	0.00255699	0.0056347
chr21	33369146	ENSG00000142166	IFNAR1	0.520672	0.005556	0.00969386
chr21	34668960	ENSG00000159212	CLIC6	0.506115	0.00289807	0.0377617
chr21	34702047	ENSG00000159212	CLIC6	0.534282	0.00344441	0.024967
chr21	34717763	ENSG00000159212	CLIC6	0.541811	0.00241068	0.0183401
chr21	41165797	ENSG00000182240	BACE2	0.544033	0.00247081	0.00662689
chr21	41167980	ENSG00000182240	BACE2	0.611332	0.0674922	0.0219574
chr21	41172669	ENSG00000182240	BACE2	0.520973	0.00138976	0.00574856
chr21	41173337	ENSG00000182240	BACE2	0.51233	0.00163022	0.00429372
chr21	41183840	ENSG00000182240	BACE2	0.510293	0.00241495	0.00661458
chr21	41185939	ENSG00000182240	BACE2	0.500123	0.00166215	0.00344921
chr21	41186834	ENSG00000182240	BACE2	0.536065	0.00220571	0.00445275
chr21	41186972	ENSG00000182240	BACE2	0.570673	0.0027585	0.00546083
chr21	41197620	ENSG00000182240	BACE2	0.50241	0.00161669	0.00434839
chr21	41200321	ENSG00000182240	BACE2	0.545597	0.00367985	0.00717406
chr21	41205370	ENSG00000182240	BACE2	0.519306	0.00279572	0.00597204
chr21	41206034	ENSG00000182240	BACE2	0.516749	0.00189519	0.00459514
chr21	41206224	ENSG00000182240	BACE2	0.508003	0.00194482	0.00436393
chr21	41207731	ENSG00000182240	BACE2	0.556216	0.00297659	0.00721138
chr21	41207802	ENSG00000182240	BACE2	0.538952	0.00197908	0.00549688
chr21	41208773	ENSG00000182240	BACE2	0.501395	0.00174582	0.00482692
chr21	41208940	ENSG00000182240	BACE2	0.5513	0.00191783	0.0051934
chr21	41211696	ENSG00000182240	BACE2	0.781672	0.00981051	0.00950305
chr21	41215284	ENSG00000182240	BACE2	0.500434	0.00154048	0.00420299
chr21	41215345	ENSG00000182240	BACE2	0.531431	0.0016261	0.00442144
chr21	41216555	ENSG00000182240	BACE2	0.534615	0.00153324	0.00401228
chr21	41217597	ENSG00000182240	BACE2	0.538971	0.00114288	0.00417151
chr21	41222798	ENSG00000182240	BACE2	0.51316	0.0013903	0.00388519
chr21	41229099	ENSG00000182240	BACE2	0.526921	0.00236635	0.0048983
chr21	41229975	ENSG00000182240	BACE2	0.50874	0.00226936	0.00525447
chr21	41233346	ENSG00000182240	BACE2	0.50944	0.00309761	0.00634743
chr21	41260790	ENSG00000182240	BACE2	0.514655	0.00222399	0.00340078
chr21	41270522	ENSG00000182240	BACE2	0.519877	0.00249412	0.00402511
chr21	41270545	ENSG00000182240	BACE2	0.505622	0.00225245	0.0038279
chr21	41271208	ENSG00000182240	BACE2	0.500063	0.00244147	0.00462912
chr21	41272700	ENSG00000182240	BACE2	0.539244	0.00389048	0.0289937
chr21	41275144	ENSG00000182240	BACE2	0.508993	0.0020697	0.00391446
chr21	41275445	ENSG00000182240	BACE2	0.511132	0.00419547	0.0501871
chr21	41277135	ENSG00000182240	BACE2	0.62215	0.00287222	0.00486143
chr21	41291963	ENSG00000182240	BACE2	0.510663	0.00201288	0.00624714
chr21	41291989	ENSG00000182240	BACE2	0.531538	0.00247659	0.00690606
chr21	42911891	ENSG00000160194	NDUFV3	0.946334	0.0437102	0.0194491
chr21	44825043	ENSG00000184900	SUMO3	0.535137	0.00697636	0.0242459
chr21	46186201	ENSG00000160285	LSS	0.520734	0.00262992	0.0215297
chr21	46191132	ENSG00000160285	LSS	0.671128	0.0121665	0.107204
chr21	46198527	ENSG00000160285	LSS	0.503838	0.00221957	0.00491063
chr21	46211085	ENSG00000160285	LSS	0.51682	0.00299749	0.00514562
chr21	46223919	ENSG00000160285	LSS	0.531214	0.0045482	0.00411207
chr21	46225494	ENSG00000215424	MCM3AP-AS1	0.520632	0.0364165	0.0195212
chr21	46226071	ENSG00000215424	MCM3AP-AS1	0.543932	0.0226717	0.0224322
chr21	46226446	ENSG00000215424	MCM3AP-AS1	0.543693	0.0071193	0.0286841
chr21	46227142	ENSG00000215424	MCM3AP-AS1	0.550428	0.0245432	0.0405269
chr21	46232764	ENSG00000215424	MCM3AP-AS1	0.507294	0.0314139	0.0215543
chr21	46243663	ENSG00000215424	MCM3AP-AS1	0.541847	0.132615	0.336138
chr21	46254529	ENSG00000215424	MCM3AP-AS1	0.722597	0.614547	0.912959
chr21	46259631	ENSG00000215424	MCM3AP-AS1	0.504229	0.0366168	0.0173212
chr22	17076744	ENSG00000177663	IL17RA	0.50674	0.00283665	0.00405418
chr22	17085983	ENSG00000177663	IL17RA	0.557011	0.00291233	0.0350383
chr22	17089698	ENSG00000177663	IL17RA	0.615698	0.000771685	0.00608169
chr22	17104538	ENSG00000177663	IL17RA	0.641172	0.00137553	0.021562
chr22	17104681	ENSG00000177663	IL17RA	0.61795	0.000909425	0.0207028
chr22	17113820	ENSG00000177663	IL17RA	0.694237	0.00186651	0.00431943
chr22	17114179	ENSG00000177663	IL17RA	0.657087	0.00124517	0.0197908
chr22	17116179	ENSG00000177663	IL17RA	0.575233	0.00113965	0.00905887
chr22	17116193	ENSG00000177663	IL17RA	0.547556	0.00115967	0.040796
chr22	17125128	ENSG00000177663	IL17RA	0.526774	0.00500792	0.042126
chr22	19939007	ENSG00000093010	COMT	0.521876	0.00246688	0.0198669
chr22	19940841	ENSG00000093010	COMT	0.512305	0.0021423	0.0047064
chr22	19940936	ENSG00000093010	COMT	0.602816	0.0030594	0.00666149
chr22	19945913	ENSG00000093010	COMT	0.500223	0.00241163	0.0154445
chr22	19970163	ENSG00000093010	COMT	0.552613	0.00254806	0.00347769
chr22	19978040	ENSG00000093010	COMT	0.656428	0.0164999	0.309068
chr22	23178633	ENSG00000186716	BCR	0.567942	0.00837347	0.0123951
chr22	23179470	ENSG00000186716	BCR	0.541139	0.00332477	0.00681383
chr22	23180517	ENSG00000186716	BCR	0.568323	0.0548474	0.0103705
chr22	23181098	ENSG00000186716	BCR	0.545154	0.0255178	0.14674
chr22	23184380	ENSG00000186716	BCR	0.532283	0.00193288	0.109662
chr22	23186241	ENSG00000186716	BCR	0.552441	0.00172276	0.00466887
chr22	23186827	ENSG00000186716	BCR	0.535703	0.00185369	0.00447202
chr22	23189275	ENSG00000186716	BCR	0.516618	0.00154961	0.00502435
chr22	23192317	ENSG00000186716	BCR	0.55494	0.00238004	0.00757036
chr22	23193238	ENSG00000186716	BCR	0.551841	0.0014229	0.00525471
chr22	23194497	ENSG00000186716	BCR	0.506149	0.00313229	0.00291206
chr22	23199976	ENSG00000186716	BCR	0.502553	0.00280203	0.00353638
chr22	23201520	ENSG00000186716	BCR	0.502457	0.00304686	0.00398655
chr22	23204563	ENSG00000186716	BCR	0.541782	0.00145868	0.00545945
chr22	23207853	ENSG00000186716	BCR	0.549851	0.00157015	0.00607121
chr22	23207991	ENSG00000186716	BCR	0.550668	0.00200507	0.00537749
chr22	23208015	ENSG00000186716	BCR	0.560688	0.00276942	0.0071405
chr22	23209037	ENSG00000186716	BCR	0.536108	0.00283933	0.00428777
chr22	23209100	ENSG00000186716	BCR	0.518978	0.00277932	0.00382412
chr22	23212143	ENSG00000186716	BCR	0.56825	0.0033589	0.0074775
chr22	23214776	ENSG00000186716	BCR	0.540608	0.00139676	0.00391925
chr22	23214999	ENSG00000186716	BCR	0.542589	0.0012299	0.00465264
chr22	23218563	ENSG00000186716	BCR	0.621811	0.000979137	0.00408573
chr22	23218883	ENSG00000186716	BCR	0.643938	0.00505988	0.0111886
chr22	23219690	ENSG00000186716	BCR	0.534101	0.000868687	0.00359007
chr22	23223175	ENSG00000186716	BCR	0.574021	0.000934049	0.00405022
chr22	23227083	ENSG00000186716	BCR	0.618808	0.00171374	0.00592664
chr22	23227534	ENSG00000186716	BCR	0.625754	0.00217017	0.00760096
chr22	23228623	ENSG00000186716	BCR	0.585396	0.00162807	0.00363406
chr22	23229236	ENSG00000186716	BCR	0.537679	0.00171719	0.00469821
chr22	23232763	ENSG00000186716	BCR	0.538903	0.0013893	0.00451795
chr22	23234086	ENSG00000186716	BCR	0.547054	0.00169587	0.00376841
chr22	23234112	ENSG00000186716	BCR	0.536907	0.00151505	0.00387309
chr22	23234342	ENSG00000186716	BCR	0.518072	0.00111992	0.00402319
chr22	23239248	ENSG00000186716	BCR	0.547705	0.00230783	0.00506381
chr22	23239270	ENSG00000186716	BCR	0.541418	0.00207604	0.00476569
chr22	23247618	ENSG00000186716	BCR	0.571646	0.00116532	0.00431609
chr22	23248364	ENSG00000186716	BCR	0.549042	0.00220385	0.00514106
chr22	23248477	ENSG00000186716	BCR	0.506065	0.00158744	0.0040116
chr22	23249916	ENSG00000186716	BCR	0.537324	0.00119826	0.0041831
chr22	23250123	ENSG00000186716	BCR	0.524408	0.00139381	0.00345024
chr22	23250632	ENSG00000186716	BCR	0.614223	0.00221597	0.00589375
chr22	23252024	ENSG00000186716	BCR	0.507849	0.00109295	0.0038223
chr22	23253805	ENSG00000186716	BCR	0.568757	0.00927331	0.0628605
chr22	23255799	ENSG00000186716	BCR	0.516695	0.00232375	0.00455483
chr22	23256690	ENSG00000186716	BCR	0.549394	0.00172325	0.00390017
chr22	23256775	ENSG00000186716	BCR	0.503103	0.00164824	0.0194416
chr22	23261559	ENSG00000186716	BCR	0.504534	0.00318001	0.00452668
chr22	23266641	ENSG00000186716	BCR	0.520487	0.00274118	0.00417613
chr22	23269068	ENSG00000186716	BCR	0.546383	0.00335202	0.00607795
chr22	23269200	ENSG00000186716	BCR	0.509496	0.00159463	0.00411175
chr22	23272388	ENSG00000186716	BCR	0.528488	0.00317936	0.00541538
chr22	23278048	ENSG00000186716	BCR	0.528153	0.00256033	0.00456245
chr22	23282593	ENSG00000186716	BCR	0.521979	0.00212831	0.0897343
chr22	23282620	ENSG00000186716	BCR	0.526703	0.00200504	0.00457544
chr22	23284208	ENSG00000186716	BCR	0.557346	0.00225669	0.00468652
chr22	23284708	ENSG00000186716	BCR	0.575899	0.00389079	0.00689987
chr22	23289178	ENSG00000186716	BCR	0.521009	0.00234293	0.00485303
chr22	23292766	ENSG00000186716	BCR	0.564296	0.00546972	0.0101973
chr22	23292804	ENSG00000186716	BCR	0.577803	0.0060265	0.0107027
chr22	23295971	ENSG00000186716	BCR	0.51755	0.00208273	0.00474077
chr22	23296682	ENSG00000186716	BCR	0.506037	0.00227209	0.00412581
chr22	23306542	ENSG00000186716	BCR	0.516287	0.00172473	0.00437803
chr22	23315933	ENSG00000186716	BCR	0.997834	0.123503	0.0434975
chr22	30026719	ENSG00000100330	MTMR3	0.565036	0.00229347	0.0241984
chr22	30027299	ENSG00000100330	MTMR3	0.603711	0.00206552	0.00501293
chr22	30030464	ENSG00000100330	MTMR3	0.746724	0.00488505	0.0039314
chr22	37645651	ENSG00000233360	Z83844.1	0.533857	0.0230557	0.0232094
chr22	37650854	ENSG00000233360	Z83844.1	0.513936	0.0251488	0.0257604
chr22	37656956	ENSG00000233360	Z83844.1	0.508545	0.0285035	0.0205877
chr22	37657848	ENSG00000233360	Z83844.1	0.54693	0.02385	0.0242772
chr22	40361520	ENSG00000100359	SGSM3	0.602816	0.021398	0.105091
chr22	40378125	ENSG00000239900	ADSL	0.527429	0.00330318	0.0294505
chr22	40385488	ENSG00000100359	SGSM3	0.540897	0.00339274	0.00548688
chr22	40413892	ENSG00000100359	SGSM3	0.528913	0.000785655	0.00381864
chr22	42075317	ENSG00000183172	SMDT1	0.505585	0.00224329	0.00366071
chr22	42083357	ENSG00000183172	SMDT1	0.698735	0.0031882	0.00255355
chr22	42083360	ENSG00000183172	SMDT1	0.551678	0.00379902	0.00266708
chr22	50092073	ENSG00000100427	MLC1	0.59225	0.010283	0.0872612
chr22	50622886	ENSG00000100299	ARSA	0.647635	0.00184713	0.0033364
chr22	50624254	ENSG00000100299	ARSA	0.582461	0.00445083	0.00378446
chr22	50626539	ENSG00000100299	ARSA	0.509377	0.00374653	0.00611788
chr22	50626859	ENSG00000100299	ARSA	0.676406	0.0292604	0.128088
chr22	50627059	ENSG00000100299	ARSA	0.637307	0.0506462	0.456351
chr2	117832360	ENSG00000088205	DDX18	0.995317	0.113763	0.00250915
chr2	148692407	ENSG00000135999	EPC2	0.750431	0.00344798	0.0186274
chr2	148736538	ENSG00000135999	EPC2	0.504493	0.00223652	0.0308335
chr2	148761715	ENSG00000135999	EPC2	0.535899	0.00665523	0.0470019
chr2	148769651	ENSG00000135999	EPC2	0.515734	0.00252138	0.0265915
chr2	148786540	ENSG00000135999	EPC2	0.665932	0.0110491	0.0749803
chr2	171788571	ENSG00000115840	SLC25A12	0.511657	0.00670338	0.0565888
chr2	171795253	ENSG00000115840	SLC25A12	0.598894	0.00533624	0.0462306
chr2	171795399	ENSG00000115840	SLC25A12	0.586141	0.00713431	0.0620926
chr2	171795400	ENSG00000115840	SLC25A12	0.567905	0.00714384	0.0546493
chr2	171935200	ENSG00000115840	SLC25A12	0.522628	0.0032226	0.024981
chr2	171939266	ENSG00000115840	SLC25A12	0.528304	0.00301311	0.00461844
chr2	171966171	ENSG00000115840	SLC25A12	0.508453	0.0147808	0.158562
chr2	173910145	ENSG00000172845	SP3	0.502521	0.00735249	0.24685
chr2	173920417	ENSG00000172845	SP3	0.54101	0.00125905	0.0326981
chr2	173922640	ENSG00000172845	SP3	0.514861	0.00113639	0.00411885
chr2	173940303	ENSG00000172845	SP3	0.630039	0.000352439	0.00361156
chr2	173942039	ENSG00000172845	SP3	0.524709	0.000852936	0.0046741
chr2	173950603	ENSG00000172845	SP3	0.520566	0.000827821	0.0202507
chr2	173958351	ENSG00000172845	SP3	0.626646	0.0030607	0.0177694
chr2	173959400	ENSG00000172845	SP3	0.575211	0.00154029	0.0308565
chr2	173966292	ENSG00000172845	SP3	0.524218	0.00589888	0.050694
chr2	191679715	ENSG00000173559	NABP1	0.510345	0.00178571	0.0042074
chr2	191690000	ENSG00000173559	NABP1	0.780039	0.00246298	0.00246045
chr2	191703682	ENSG00000173559	NABP1	0.518266	0.00320801	0.00746512
chr2	191974214	ENSG00000144339	TMEFF2	0.564347	0.00666132	0.0130045
chr2	192008517	ENSG00000144339	TMEFF2	0.517262	0.00404857	0.00737382
chr2	192021403	ENSG00000144339	TMEFF2	0.515222	0.00616418	0.0121722
chr2	192045730	ENSG00000144339	TMEFF2	0.523355	0.00307446	0.0246019
chr2	192104849	ENSG00000144339	TMEFF2	0.551169	0.00740695	0.0611137
chr2	192194187	ENSG00000144339	TMEFF2	0.504551	0.000865744	0.00840168
chr2	192195142	ENSG00000144339	TMEFF2	0.560764	0.0121517	0.0119585
chr2	206161407	ENSG00000114942	EEF1B2	0.62429	0.0109533	0.128275
chr2	218403428	ENSG00000144579	CTDSP1	0.503946	0.00209753	0.0384143
chr2	218403769	ENSG00000144579	CTDSP1	0.754633	0.00253985	0.00507626
chr2	224474757	ENSG00000036257	CUL3	0.528863	0.00241534	0.00568521
chr2	224492608	ENSG00000036257	CUL3	0.504285	0.00258311	0.0318581
chr2	224515397	ENSG00000036257	CUL3	0.518532	0.00197375	0.0374499
chr2	224519097	ENSG00000036257	CUL3	0.599348	0.000748706	0.00482849
chr2	224519098	ENSG00000036257	CUL3	0.599942	0.000737316	0.00487512
chr2	224527342	ENSG00000036257	CUL3	0.510117	0.00199557	0.00535567
chr2	224527926	ENSG00000036257	CUL3	0.51041	0.00204962	0.0339078
chr2	224532062	ENSG00000036257	CUL3	0.516395	0.00228065	0.0062578
chr2	224566391	ENSG00000036257	CUL3	0.56171	0.000754646	0.0250647
chr2	224576727	ENSG00000036257	CUL3	0.560303	0.00146093	0.00725521
chr2	232688014	ENSG00000204120	GIGYF2	0.505218	0.00345804	0.0345003
chr2	232698923	ENSG00000204120	GIGYF2	0.561919	0.00115202	0.0335386
chr2	232702704	ENSG00000204120	GIGYF2	0.531286	0.00153909	0.00762983
chr2	232707233	ENSG00000204120	GIGYF2	0.504627	0.00184884	0.0221272
chr2	232707460	ENSG00000204120	GIGYF2	0.531279	0.00183465	0.00579644
chr2	232731644	ENSG00000204120	GIGYF2	0.516729	0.00130368	0.0215713
chr2	232761870	ENSG00000204120	GIGYF2	0.516827	0.00476511	0.0395435
chr2	232763723	ENSG00000204120	GIGYF2	0.50533	0.00290792	0.0210442
chr2	232795306	ENSG00000204120	GIGYF2	0.506562	0.00211225	0.0284762
chr2	232798106	ENSG00000204120	GIGYF2	0.512355	0.00243891	0.0253696
chr2	232859393	ENSG00000204120	GIGYF2	0.602217	0.00196331	0.00315591
chr2	232859711	ENSG00000204120	GIGYF2	0.631843	0.00208415	0.019487
chr2	240551563	ENSG00000188542	DUSP28	0.586113	0.00201171	0.0233033
chr2	240552631	ENSG00000188542	DUSP28	0.536409	0.00212096	0.0168482
chr2	240555785	ENSG00000188542	DUSP28	0.508221	0.00219462	0.0202153
chr2	240564459	ENSG00000188542	DUSP28	0.685568	0.000989663	0.0127912
chr2	240565233	ENSG00000188542	DUSP28	0.996997	0.0223067	0.00291922
chr2	26689449	ENSG00000171303	KCNK3	0.550459	0.00898289	0.0726487
chr2	26732373	ENSG00000171303	KCNK3	0.784945	0.00316343	0.0164403
chr2	36734043	ENSG00000205221	VIT	0.503389	0.00210978	0.00415558
chr2	36787174	ENSG00000205221	VIT	0.601764	0.0211709	0.372359
chr2	36814964	ENSG00000205221	VIT	0.505582	0.00224043	0.00700731
chr2	36822220	ENSG00000205221	VIT	0.508331	0.0019037	0.00735791
chr2	38581501	ENSG00000143889	HNRNPLL	0.523912	0.0117779	0.99953
chr2	38917352	ENSG00000214694	ARHGEF33	0.501008	0.00341649	0.0200973
chr2	38984647	ENSG00000214694	ARHGEF33	0.653412	0.0098774	0.0504354
chr2	43886311	ENSG00000138095	LRPPRC	0.555688	0.00237413	0.00487193
chr2	43886424	ENSG00000138095	LRPPRC	0.568416	0.00350694	0.00687173
chr2	43936634	ENSG00000138095	LRPPRC	0.518566	0.00435917	0.00842955
chr2	43946874	ENSG00000138095	LRPPRC	0.600792	0.0105989	0.0187326
chr2	43948532	ENSG00000138095	LRPPRC	0.527346	0.0130753	0.060519
chr2	43949840	ENSG00000138095	LRPPRC	0.513044	0.00486949	0.0134023
chr2	43958092	ENSG00000138095	LRPPRC	0.549467	0.00282501	0.00498644
chr2	43967033	ENSG00000138095	LRPPRC	0.502767	0.00238391	0.00458219
chr2	43967802	ENSG00000138095	LRPPRC	0.504491	0.00308722	0.00563053
chr2	43972962	ENSG00000138095	LRPPRC	0.533477	0.0079489	0.0156368
chr2	44005365	ENSG00000138095	LRPPRC	0.530418	0.0031395	0.00764302
chr2	73845019	ENSG00000124356	STAMBP	0.567411	0.00274447	0.00577378
chr2	73860278	ENSG00000124356	STAMBP	0.509848	0.027751	0.0266183
chr2	74190096	ENSG00000065911	MTHFD2	0.501321	0.00456584	0.00779771
chr2	74190182	ENSG00000065911	MTHFD2	0.50451	0.00342457	0.00617374
chr2	74194306	ENSG00000065911	MTHFD2	0.507832	0.00334607	0.00380541
chr2	74201203	ENSG00000065911	MTHFD2	0.522998	0.00129456	0.00404095
chr2	74206730	ENSG00000065911	MTHFD2	0.519398	0.00170998	0.00276776
chr2	74207031	ENSG00000065911	MTHFD2	0.576016	0.000996286	0.00664069
chr2	74207306	ENSG00000065911	MTHFD2	0.530129	0.00365999	0.00412128
chr2	74215226	ENSG00000065911	MTHFD2	0.82686	0.0145345	0.0108956
chr2	74216415	ENSG00000065911	MTHFD2	0.996845	0.0553217	0.00761494
chr2	74216856	ENSG00000065911	MTHFD2	0.578841	0.00249937	0.0035994
chr2	74217180	ENSG00000065911	MTHFD2	0.628613	0.00671091	0.00948214
chr2	74221699	ENSG00000065911	MTHFD2	0.511111	0.002937	0.00604214
chr2	86121020	ENSG00000132300	PTCD3	0.510965	0.0037835	0.0337675
chr2	9396398	ENSG00000119185	ITGB1BP1	0.510366	0.00295047	0.00349825
chr2	9402933	ENSG00000119185	ITGB1BP1	0.516482	0.00257553	0.00511461
chr2	9404659	ENSG00000119185	ITGB1BP1	0.56487	0.00234968	0.00491602
chr2	9415778	ENSG00000119185	ITGB1BP1	0.532696	0.959967	0.0045717
chr2	9420348	ENSG00000119185	ITGB1BP1	0.504455	0.00147677	0.0055005
chr2	9420545	ENSG00000119185	ITGB1BP1	0.507345	0.00203113	0.00623473
chr2	9422552	ENSG00000119185	ITGB1BP1	0.515217	0.138373	0.0194845
chr3	112533340	ENSG00000144848	ATG3	0.569997	0.00243694	0.00544321
chr3	120602310	ENSG00000065518	NDUFB4	0.99733	0.999347	0.00208147
chr3	123193303	ENSG00000121542	SEC22A	0.536444	0.00333273	0.0340381
chr3	123224572	ENSG00000121542	SEC22A	0.519345	0.00342616	0.024144
chr3	123235866	ENSG00000121542	SEC22A	0.506552	0.00328318	0.0273575
chr3	123236612	ENSG00000121542	SEC22A	0.522095	0.00438422	0.0360567
chr3	12897234	ENSG00000144711	IQSEC1	0.995634	0.101445	0.00324492
chr3	12897263	ENSG00000144711	IQSEC1	0.680802	0.0100102	0.0596101
chr3	129283972	ENSG00000183624	HMCES	0.509949	0.00232878	0.0270746
chr3	129305235	ENSG00000183624	HMCES	0.938922	0.048959	0.000962029
chr3	12930866	ENSG00000144711	IQSEC1	0.500183	0.00073358	0.00484384
chr3	129472591	ENSG00000163913	IFT122	0.506264	0.00380033	0.00509814
chr3	129478141	ENSG00000163913	IFT122	0.562529	0.0182081	0.130285
chr3	129485862	ENSG00000163913	IFT122	0.577017	0.0088883	0.0061584
chr3	12999520	ENSG00000144711	IQSEC1	0.503039	0.00528515	0.00468222
chr3	13038658	ENSG00000144711	IQSEC1	0.502059	0.00282359	0.00480206
chr3	130861568	ENSG00000017260	ATP2C1	0.501014	0.00149448	0.0184388
chr3	130925577	ENSG00000017260	ATP2C1	0.53046	0.00104258	0.00387395
chr3	130930533	ENSG00000017260	ATP2C1	0.688595	0.122052	0.934165
chr3	130952760	ENSG00000017260	ATP2C1	0.544777	0.00460381	0.0383129
chr3	130960368	ENSG00000017260	ATP2C1	0.515614	0.0295996	0.0233408
chr3	130960420	ENSG00000017260	ATP2C1	0.512594	0.00266617	0.0210188
chr3	130970919	ENSG00000017260	ATP2C1	0.501951	0.00328863	0.0262093
chr3	131017653	ENSG00000017260	ATP2C1	0.51267	0.00363339	0.0241599
chr3	131383345	ENSG00000198585	NUDT16	0.521305	0.397917	0.208672
chr3	131393258	ENSG00000198585	NUDT16	0.531796	0.394583	0.0341394
chr3	131394146	ENSG00000198585	NUDT16	0.575043	0.383402	0.0461953
chr3	141903099	ENSG00000069849	ATP1B3	0.50706	0.00234139	0.00447349
chr3	141926180	ENSG00000069849	ATP1B3	0.997268	0.104535	0.00253451
chr3	149319202	ENSG00000163762	TM4SF18	0.578826	0.00270334	0.0204912
chr3	149328267	ENSG00000163762	TM4SF18	0.500902	0.00168099	0.0196645
chr3	156221817	ENSG00000169282	KCNAB1	0.501203	0.00252604	0.00384853
chr3	156400512	ENSG00000169282	KCNAB1	0.506873	0.00363005	0.00603594
chr3	197671257	ENSG00000145016	RUBCN	0.523344	0.00301241	0.0027065
chr3	39502806	ENSG00000168314	MOBP	0.522798	0.00250445	0.19718
chr3	39525220	ENSG00000168314	MOBP	0.584987	0.00284233	0.0999184
chr3	4847486	ENSG00000150995	ITPR1	0.962864	0.160616	0.00380707
chr3	9501827	ENSG00000156959	LHFPL4	0.529914	0.0496245	0.00326962
chr4	112275310	ENSG00000145365	TIFA	0.647181	0.00100706	0.0236152
chr4	112277106	ENSG00000145365	TIFA	0.996989	0.0283002	0.00591742
chr4	112316771	ENSG00000073331	ALPK1	0.536137	0.00327627	0.00646884
chr4	112316812	ENSG00000073331	ALPK1	0.734316	0.00406788	0.00471311
chr4	112316828	ENSG00000073331	ALPK1	0.996427	0.0456616	0.00127605
chr4	112335786	ENSG00000073331	ALPK1	0.527738	0.00285609	0.00583433
chr4	112356669	ENSG00000073331	ALPK1	0.603111	0.0115128	0.0150213
chr4	112360455	ENSG00000073331	ALPK1	0.500487	0.0021171	0.00378764
chr4	112362129	ENSG00000073331	ALPK1	0.51281	0.00237956	0.00410774
chr4	112368200	ENSG00000073331	ALPK1	0.511632	0.00273499	0.00397481
chr4	112371436	ENSG00000073331	ALPK1	0.511577	0.00203363	0.00400555
chr4	112373300	ENSG00000073331	ALPK1	0.520525	0.00245686	0.00476246
chr4	112374768	ENSG00000073331	ALPK1	0.507156	0.00250294	0.00457332
chr4	112448935	ENSG00000073331	ALPK1	0.565644	0.00672906	0.0160652
chr4	143176191	ENSG00000170185	USP38	0.505182	0.00487741	0.0324874
chr4	143192258	ENSG00000170185	USP38	0.521765	0.00321163	0.0325887
chr4	166742223	ENSG00000196104	SPOCK3	0.504746	0.0022384	0.0204131
chr4	166873808	ENSG00000196104	SPOCK3	0.504739	0.00229835	0.0228745
chr4	166883258	ENSG00000196104	SPOCK3	0.575757	0.002531	0.0228829
chr4	166935393	ENSG00000196104	SPOCK3	0.523976	0.00243047	0.00301788
chr4	167082516	ENSG00000196104	SPOCK3	0.554741	0.00273186	0.02465
chr4	167206142	ENSG00000196104	SPOCK3	0.511283	0.00241403	0.0184564
chr4	182157689	ENSG00000218336	TENM3	0.507813	0.0023678	0.0298186
chr4	182192714	ENSG00000218336	TENM3	0.516275	0.0575443	0.0570674
chr4	182251639	ENSG00000218336	TENM3	0.514904	0.00306292	0.0325751
chr4	182252260	ENSG00000218336	TENM3	0.597684	0.00731339	0.0621652
chr4	182311692	ENSG00000218336	TENM3	0.557374	0.00642073	0.0627573
chr4	182356369	ENSG00000218336	TENM3	0.504436	0.0262327	0.0221826
chr4	182365937	ENSG00000218336	TENM3	0.502197	0.0235599	0.0193672
chr4	182573667	ENSG00000218336	TENM3	0.52331	0.0503298	0.0531217
chr4	182621130	ENSG00000218336	TENM3	0.505024	0.0367715	0.0173384
chr4	182657384	ENSG00000218336	TENM3	0.507402	0.0343914	0.0271195
chr4	182752481	ENSG00000218336	TENM3	0.599388	0.00871062	0.0681273
chr4	182806781	ENSG00000218336	TENM3	0.537664	0.00915771	0.0572464
chr4	46256268	ENSG00000151834	GABRA2	0.501256	0.00877073	0.071076
chr4	46287215	ENSG00000151834	GABRA2	0.508907	0.00267224	0.00439341
chr4	46335803	ENSG00000151834	GABRA2	0.525116	0.00254712	0.00391191
chr4	46367353	ENSG00000151834	GABRA2	0.562327	0.00269624	0.00577665
chr4	46453356	ENSG00000151834	GABRA2	0.517156	0.0021148	0.00443759
chr4	46476698	ENSG00000151834	GABRA2	0.541111	0.00561749	0.00877076
chr4	48136316	ENSG00000135605	TEC	0.562223	0.00297629	0.0174802
chr4	48150360	ENSG00000135605	TEC	0.526275	0.00299851	0.0194836
chr4	48154379	ENSG00000135605	TEC	0.520251	0.00267487	0.0190915
chr4	48193524	ENSG00000135605	TEC	0.512601	0.00253337	0.0236386
chr4	48234222	ENSG00000135605	TEC	0.502208	0.00301891	0.0222973
chr4	48237583	ENSG00000135605	TEC	0.506524	0.00307588	0.0273711
chr4	48250118	ENSG00000135605	TEC	0.531981	0.00538759	0.0403197
chr4	57061167	ENSG00000163453	IGFBP7	0.524039	0.00215736	0.027439
chr4	57062618	ENSG00000163453	IGFBP7	0.513295	0.00124377	0.00389285
chr4	57062980	ENSG00000163453	IGFBP7	0.534658	0.00154883	0.0219093
chr4	57064180	ENSG00000163453	IGFBP7	0.531817	0.00126581	0.0196926
chr4	57068769	ENSG00000163453	IGFBP7	0.517798	0.00186146	0.00583386
chr4	57068928	ENSG00000163453	IGFBP7	0.542378	0.00259905	0.00746553
chr4	57069167	ENSG00000163453	IGFBP7	0.55266	0.00251336	0.0301349
chr4	57077230	ENSG00000163453	IGFBP7	0.504558	0.00191174	0.0260174
chr4	57077877	ENSG00000163453	IGFBP7	0.548391	0.00176644	0.0172668
chr4	57094828	ENSG00000163453	IGFBP7	0.556086	0.00197587	0.0059706
chr4	57095333	ENSG00000163453	IGFBP7	0.529245	0.00157933	0.00443169
chr4	57107375	ENSG00000163453	IGFBP7	0.563419	0.00271863	0.0416077
chr4	57111945	ENSG00000163453	IGFBP7	0.518668	0.00210233	0.00418955
chr5	10997189	ENSG00000169862	CTNND2	0.531275	0.00237446	0.00399319
chr5	11027973	ENSG00000169862	CTNND2	0.510316	0.00294598	0.0285232
chr5	11068682	ENSG00000169862	CTNND2	0.511827	0.00282306	0.0124
chr5	11112776	ENSG00000169862	CTNND2	0.562264	0.0042342	0.00643111
chr5	11155024	ENSG00000169862	CTNND2	0.507096	0.00210229	0.0246336
chr5	11161636	ENSG00000169862	CTNND2	0.509834	0.00335397	0.0330687
chr5	11163993	ENSG00000169862	CTNND2	0.521332	0.00267299	0.0210629
chr5	11181022	ENSG00000169862	CTNND2	0.531399	0.00186865	0.0214773
chr5	11224167	ENSG00000169862	CTNND2	0.573353	0.00370322	0.00592333
chr5	11230768	ENSG00000169862	CTNND2	0.522003	0.00284573	0.0321366
chr5	11332206	ENSG00000169862	CTNND2	0.500659	0.0031718	0.00320257
chr5	11360839	ENSG00000169862	CTNND2	0.504554	0.00210655	0.00446351
chr5	11365909	ENSG00000169862	CTNND2	0.544947	0.00195448	0.0206993
chr5	11504764	ENSG00000169862	CTNND2	0.525893	0.00166068	0.00455762
chr5	11528165	ENSG00000169862	CTNND2	0.544774	0.00543184	0.0139154
chr5	11540500	ENSG00000169862	CTNND2	0.517924	0.00253196	0.0177785
chr5	11579507	ENSG00000169862	CTNND2	0.554331	0.00683419	0.0161489
chr5	11581864	ENSG00000169862	CTNND2	0.516112	0.00210087	0.00466994
chr5	11591284	ENSG00000169862	CTNND2	0.512627	0.0019733	0.00482541
chr5	11591982	ENSG00000169862	CTNND2	0.516615	0.00202696	0.00477383
chr5	11593703	ENSG00000169862	CTNND2	0.531123	0.00214554	0.0207037
chr5	11593906	ENSG00000169862	CTNND2	0.556589	0.00140933	0.00388746
chr5	11597139	ENSG00000169862	CTNND2	0.511434	0.0023501	0.00405696
chr5	11597758	ENSG00000169862	CTNND2	0.561398	0.00164946	0.00339705
chr5	11600461	ENSG00000169862	CTNND2	0.529901	0.00337614	0.00472311
chr5	11609968	ENSG00000169862	CTNND2	0.538539	0.00587833	0.0117436
chr5	11611040	ENSG00000169862	CTNND2	0.534554	0.0028371	0.00459949
chr5	11619350	ENSG00000169862	CTNND2	0.508619	0.00251956	0.00422027
chr5	11620536	ENSG00000169862	CTNND2	0.527968	0.00254319	0.00508979
chr5	11627747	ENSG00000169862	CTNND2	0.533166	0.00285378	0.00469312
chr5	11627996	ENSG00000169862	CTNND2	0.546383	0.00197023	0.0130421
chr5	11672852	ENSG00000169862	CTNND2	0.562022	0.00236983	0.00298744
chr5	11684949	ENSG00000169862	CTNND2	0.553892	0.00209632	0.0208042
chr5	11703509	ENSG00000169862	CTNND2	0.538841	0.00209693	0.0212772
chr5	11709030	ENSG00000169862	CTNND2	0.528571	0.00230078	0.0192778
chr5	11719941	ENSG00000169862	CTNND2	0.543515	0.00236491	0.0192396
chr5	11801830	ENSG00000169862	CTNND2	0.506371	0.00175584	0.0180411
chr5	11829770	ENSG00000169862	CTNND2	0.541779	0.00336582	0.0215062
chr5	11830921	ENSG00000169862	CTNND2	0.500929	0.00292446	0.0253207
chr5	11831055	ENSG00000169862	CTNND2	0.526267	0.0025317	0.0205737
chr5	11833402	ENSG00000169862	CTNND2	0.51626	0.00189565	0.00394018
chr5	11904401	ENSG00000169862	CTNND2	0.555609	0.0523855	0.0630758
chr5	134402697	ENSG00000237190	CDKN2AIPNL	0.99183	0.126025	0.0077036
chr5	144159261	ENSG00000145817	YIPF5	0.713682	0.00883274	0.0202818
chr5	16654895	ENSG00000145555	MYO10	0.526508	0.00207211	0.0167136
chr5	16660605	ENSG00000145555	MYO10	0.518564	0.00303008	0.0158716
chr5	16662255	ENSG00000145555	MYO10	0.561785	0.00239378	0.00394228
chr5	16664958	ENSG00000145555	MYO10	0.606253	0.00331038	0.0199419
chr5	16667720	ENSG00000145555	MYO10	0.505888	0.00225255	0.00438972
chr5	16668732	ENSG00000145555	MYO10	0.505455	0.00234132	0.00392525
chr5	16675035	ENSG00000145555	MYO10	0.629296	0.0163594	0.420054
chr5	16697869	ENSG00000145555	MYO10	0.536647	0.00222233	0.00560747
chr5	16731835	ENSG00000145555	MYO10	0.551293	0.00231329	0.0234086
chr5	16732592	ENSG00000145555	MYO10	0.53744	0.00359118	0.0106279
chr5	16733638	ENSG00000145555	MYO10	0.522106	0.00425295	0.014651
chr5	16734379	ENSG00000145555	MYO10	0.518654	0.0018363	0.0195389
chr5	16735651	ENSG00000145555	MYO10	0.503197	0.00236692	0.020863
chr5	16748541	ENSG00000145555	MYO10	0.500518	0.00269152	0.00407067
chr5	16778347	ENSG00000145555	MYO10	0.562734	0.00272554	0.0284585
chr5	16781464	ENSG00000145555	MYO10	0.521047	0.00263457	0.0054793
chr5	16785985	ENSG00000145555	MYO10	0.520611	0.000867947	0.0263188
chr5	16801081	ENSG00000145555	MYO10	0.547905	0.00128606	0.0255782
chr5	16822786	ENSG00000145555	MYO10	0.521327	0.00508932	0.018089
chr5	16822788	ENSG00000145555	MYO10	0.518441	0.00484203	0.0175197
chr5	16822814	ENSG00000145555	MYO10	0.502697	0.00380359	0.0147961
chr5	16824674	ENSG00000145555	MYO10	0.505081	0.00261942	0.00372907
chr5	16835636	ENSG00000145555	MYO10	0.513645	0.00145719	0.0309375
chr5	16840694	ENSG00000145555	MYO10	0.503577	0.00210473	0.00535234
chr5	16842737	ENSG00000145555	MYO10	0.522161	0.00159564	0.00387403
chr5	16843081	ENSG00000145555	MYO10	0.54578	0.013477	0.0203149
chr5	16843518	ENSG00000145555	MYO10	0.532401	0.000705138	0.00576966
chr5	16845129	ENSG00000145555	MYO10	0.531347	0.0207487	0.0295415
chr5	16847411	ENSG00000145555	MYO10	0.506275	0.00240183	0.00388293
chr5	16850299	ENSG00000145555	MYO10	0.503067	0.00232999	0.00416781
chr5	16852864	ENSG00000145555	MYO10	0.517867	0.00163776	0.00557656
chr5	16853010	ENSG00000145555	MYO10	0.506659	0.00120813	0.0202608
chr5	16853096	ENSG00000145555	MYO10	0.521739	0.00190214	0.0143516
chr5	16853146	ENSG00000145555	MYO10	0.505232	0.00236168	0.00310934
chr5	16853648	ENSG00000145555	MYO10	0.513182	0.00110333	0.00558725
chr5	16853698	ENSG00000145555	MYO10	0.536442	0.00172887	0.00658976
chr5	16853733	ENSG00000145555	MYO10	0.560092	0.000964647	0.00550735
chr5	16855097	ENSG00000145555	MYO10	0.516415	0.00135889	0.00673422
chr5	16855323	ENSG00000145555	MYO10	0.505597	0.000990343	0.00603716
chr5	16855632	ENSG00000145555	MYO10	0.613344	0.00342819	0.0101297
chr5	16855860	ENSG00000145555	MYO10	0.618209	0.00291286	0.010589
chr5	16856117	ENSG00000145555	MYO10	0.519946	0.00142306	0.00549188
chr5	16856223	ENSG00000145555	MYO10	0.521087	0.0012616	0.00617678
chr5	16856520	ENSG00000145555	MYO10	0.522111	0.00290886	0.00397495
chr5	16856591	ENSG00000145555	MYO10	0.541495	0.00213145	0.00539529
chr5	16856915	ENSG00000145555	MYO10	0.504296	0.00119384	0.00482533
chr5	16857349	ENSG00000145555	MYO10	0.512154	0.00120248	0.00711277
chr5	16857445	ENSG00000145555	MYO10	0.51736	0.00152408	0.00517702
chr5	16857590	ENSG00000145555	MYO10	0.511002	0.0012676	0.00523599
chr5	16858701	ENSG00000145555	MYO10	0.555385	0.00284703	0.00439946
chr5	16860377	ENSG00000145555	MYO10	0.513326	0.00156576	0.00502904
chr5	16861454	ENSG00000145555	MYO10	0.53279	0.00342127	0.00487662
chr5	16870165	ENSG00000145555	MYO10	0.565138	0.00130658	0.00452626
chr5	16873642	ENSG00000145555	MYO10	0.533729	0.0037765	0.00553035
chr5	16898597	ENSG00000145555	MYO10	0.531484	0.003325	0.0233934
chr5	16898884	ENSG00000145555	MYO10	0.543867	0.00137624	0.00473712
chr5	16902705	ENSG00000145555	MYO10	0.54052	0.00207978	0.00517116
chr5	16904515	ENSG00000145555	MYO10	0.537862	0.000883349	0.00329626
chr5	16906208	ENSG00000145555	MYO10	0.527395	0.000645826	0.00530541
chr5	16911733	ENSG00000145555	MYO10	0.551791	0.00125604	0.00397267
chr5	16921954	ENSG00000145555	MYO10	0.520967	0.00184325	0.0039096
chr5	16929101	ENSG00000145555	MYO10	0.518385	0.00363435	0.0186607
chr5	16931651	ENSG00000145555	MYO10	0.53633	0.000720651	0.0380337
chr5	16935258	ENSG00000145555	MYO10	0.515001	0.00335701	0.0829383
chr5	175958452	ENSG00000051596	THOC3	0.508271	0.0630966	0.757752
chr5	38453690	ENSG00000164318	EGFLAM	0.57553	0.00470682	0.0113748
chr5	38464532	ENSG00000164318	EGFLAM	0.997194	0.028185	0.00113379
chr5	40968846	ENSG00000112936	C7	0.505237	0.00333484	0.0216471
chr5	40985606	ENSG00000112936	C7	0.563527	0.00716036	0.0146525
chr5	40987220	ENSG00000112936	C7	0.518392	0.00376283	0.00820995
chr5	66154098	ENSG00000153914	SREK1	0.509608	0.00256132	0.0131602
chr5	66156579	ENSG00000153914	SREK1	0.58149	0.00246393	0.00409006
chr5	66180638	ENSG00000153914	SREK1	0.997368	0.0981081	0.00367827
chr5	69490177	ENSG00000197822	OCLN	0.529484	0.00359462	0.051998
chr5	69499914	ENSG00000197822	OCLN	0.523664	0.00208942	0.0220519
chr5	69520391	ENSG00000197822	OCLN	0.557678	0.00357835	0.0149442
chr5	69520904	ENSG00000197822	OCLN	0.56044	0.00300723	0.0163528
chr5	69528916	ENSG00000197822	OCLN	0.537647	0.00259075	0.0319407
chr5	69533420	ENSG00000197822	OCLN	0.511165	0.00191279	0.0198728
chr5	700799	ENSG00000206077	ZDHHC11B	0.509444	0.00283244	0.00514931
chr5	77424053	ENSG00000164253	WDR41	0.547509	0.00673536	0.0459866
chr5	77455308	ENSG00000164253	WDR41	0.504041	0.00377802	0.00670577
chr5	77485921	ENSG00000164253	WDR41	0.571644	0.0098654	0.0156187
chr5	77489066	ENSG00000164253	WDR41	0.50791	0.00381571	0.00969617
chr5	77524893	ENSG00000164253	WDR41	0.504111	0.00320435	0.00655116
chr5	77539464	ENSG00000164253	WDR41	0.534165	0.003301	0.00613441
chr5	77553426	ENSG00000164253	WDR41	0.504842	0.00243437	0.00452191
chr5	77556929	ENSG00000164253	WDR41	0.524973	0.00232705	0.00549742
chr5	77585950	ENSG00000164253	WDR41	0.520307	0.00494708	0.00775482
chr5	96757490	ENSG00000164307	ERAP1	0.556796	0.0109205	0.148122
chr5	96757941	ENSG00000164307	ERAP1	0.512282	0.00286299	0.00344799
chr5	96764519	ENSG00000164307	ERAP1	0.5184	0.00237431	0.00716236
chr5	96778425	ENSG00000164307	ERAP1	0.519095	0.00249399	0.00499673
chr5	96778829	ENSG00000164307	ERAP1	0.520586	0.00260992	0.00560439
chr5	96779208	ENSG00000164307	ERAP1	0.545715	0.00347766	0.007295
chr5	96779965	ENSG00000164307	ERAP1	0.800077	0.00906094	0.010806
chr5	96780405	ENSG00000164307	ERAP1	0.544164	0.00339429	0.0064275
chr5	96781653	ENSG00000164307	ERAP1	0.735192	0.00354493	0.00771876
chr5	96805219	ENSG00000164307	ERAP1	0.565041	0.00219657	0.00539717
chr6	110978503	ENSG00000197498	RPF2	0.501363	0.00638539	0.00835397
chr6	110979382	ENSG00000197498	RPF2	0.514129	0.00576548	0.00856394
chr6	110980634	ENSG00000197498	RPF2	0.503543	0.00309634	0.00470646
chr6	110996620	ENSG00000197498	RPF2	0.502487	0.00304231	0.00623346
chr6	111013760	ENSG00000197498	RPF2	0.50162	0.00334611	0.00677757
chr6	111018268	ENSG00000197498	RPF2	0.521089	0.00361224	0.0229143
chr6	111020318	ENSG00000197498	RPF2	0.505004	0.00355268	0.0048064
chr6	111020490	ENSG00000197498	RPF2	0.53922	0.00702666	0.00926604
chr6	111026854	ENSG00000197498	RPF2	0.747016	0.00482259	0.00362154
chr6	111027993	ENSG00000197498	RPF2	0.563023	0.00366658	0.0284842
chr6	111784749	ENSG00000010810	FYN	0.514505	0.00300834	0.0616438
chr6	113929579	ENSG00000196591	HDAC2	0.548145	0.00323589	0.00688886
chr6	113933239	ENSG00000196591	HDAC2	0.619234	0.00312399	0.00467649
chr6	113939191	ENSG00000196591	HDAC2	0.633833	0.00298505	0.0221792
chr6	113962663	ENSG00000196591	HDAC2	0.528712	0.00127642	0.0224902
chr6	114007707	ENSG00000196591	HDAC2	0.585173	0.00426874	0.0424037
chr6	159690153	ENSG00000112096	SOD2	0.539725	0.00171875	0.004089
chr6	17886162	ENSG00000137177	KIF13A	0.503592	0.00142913	0.0236311
chr6	17922399	ENSG00000137177	KIF13A	0.51179	0.00148513	0.0248842
chr6	17943786	ENSG00000137177	KIF13A	0.533496	0.00136445	0.0174733
chr6	17974504	ENSG00000137177	KIF13A	0.563513	0.00101105	0.0249754
chr6	17985357	ENSG00000137177	KIF13A	0.594985	0.00374941	0.0149019
chr6	31854087	ENSG00000204386	NEU1	0.507427	0.00634644	0.0254761
chr6	31859663	ENSG00000204386	NEU1	0.534579	0.978655	0.00663841
chr6	32652525	ENSG00000179344	HLA-DQB1	0.51171	0.00307455	0.00861028
chr6	32655841	ENSG00000179344	HLA-DQB1	0.50664	0.00421302	0.00487093
chr6	32669880	ENSG00000179344	HLA-DQB1	0.50946	0.00344764	0.142308
chr6	32670000	ENSG00000179344	HLA-DQB1	0.511638	0.00371289	0.00727493
chr6	32673277	ENSG00000179344	HLA-DQB1	0.513738	0.00578719	0.00734477
chr6	32675266	ENSG00000179344	HLA-DQB1	0.52694	0.00512674	0.00942766
chr6	32678091	ENSG00000179344	HLA-DQB1	0.534238	0.00509036	0.180997
chr6	32819732	ENSG00000204267	TAP2	0.536085	0.00266002	0.00401132
chr6	32842188	ENSG00000204267	TAP2	0.549158	0.00978179	0.0997911
chr6	33071009	ENSG00000223865	HLA-DPB1	0.507293	0.00108714	0.00515968
chr6	33072186	ENSG00000223865	HLA-DPB1	0.53087	0.00101562	0.00857042
chr6	33073812	ENSG00000223865	HLA-DPB1	0.524961	0.00165384	0.00522761
chr6	33079228	ENSG00000223865	HLA-DPB1	0.52956	0.00144795	0.00493615
chr6	33085617	ENSG00000223865	HLA-DPB1	0.512312	0.00211391	0.00792216
chr6	33089573	ENSG00000223865	HLA-DPB1	0.617884	0.0034715	0.00566574
chr6	33089586	ENSG00000223865	HLA-DPB1	0.585308	0.00220328	0.00410606
chr6	34533284	ENSG00000124507	PACSIN1	0.525362	0.0029742	0.0134515
chr6	35584492	ENSG00000096060	FKBP5	0.594968	0.303293	0.00545977
chr6	35603473	ENSG00000096060	FKBP5	0.5167	0.0025992	0.00790325
chr6	35621165	ENSG00000096060	FKBP5	0.518508	0.00446129	0.00890977
chr6	35684288	ENSG00000096060	FKBP5	0.528914	0.00155947	0.00427538
chr6	35690652	ENSG00000096060	FKBP5	0.540041	0.00213441	0.0845843
chr6	35711754	ENSG00000096060	FKBP5	0.511515	0.00335483	0.111377
chr6	35721093	ENSG00000096060	FKBP5	0.565606	0.00199687	0.00331585
chr6	35727793	ENSG00000096060	FKBP5	0.509058	0.00581624	0.0944407
chr6	35730333	ENSG00000096060	FKBP5	0.530964	0.00345094	0.11984
chr6	35738076	ENSG00000096060	FKBP5	0.565582	0.0186657	0.0452934
chr6	57173347	ENSG00000112208	BAG2	0.510398	0.00380902	0.0110596
chr6	83169984	ENSG00000013375	PGM3	0.994757	0.0401689	0.00582342
chr6	83185434	ENSG00000013375	PGM3	0.505686	0.00257574	0.0253181
chr6	99436246	ENSG00000123552	USP45	0.521267	0.00635748	0.0398595
chr6	99437370	ENSG00000123552	USP45	0.836628	0.964436	0.0212178
chr6	99468094	ENSG00000123552	USP45	0.617746	0.061762	0.854554
chr6	99478017	ENSG00000123552	USP45	0.505436	0.00247169	0.0234128
chr6	99480710	ENSG00000123552	USP45	0.514289	0.00387405	0.0288736
chr6	99502815	ENSG00000123552	USP45	0.510842	0.00280546	0.0198385
chr6	99513030	ENSG00000123552	USP45	0.530249	0.00295309	0.0500836
chr6	99524458	ENSG00000123552	USP45	0.523301	0.00361788	0.0187833
chr7	103092753	ENSG00000170632	ARMC10	0.580925	0.00336173	0.00230924
chr7	103099871	ENSG00000170632	ARMC10	0.699537	0.00659866	0.0032702
chr7	103103416	ENSG00000170632	ARMC10	0.721578	0.103803	0.737424
chr7	103103446	ENSG00000170632	ARMC10	0.608125	0.0123243	0.132894
chr7	10995003	ENSG00000106443	PHF14	0.503584	0.00328698	0.0236919
chr7	17793431	ENSG00000071189	SNX13	0.639012	0.00962331	0.0121187
chr7	23098176	ENSG00000122550	KLHL7	0.519704	0.00294749	0.00525026
chr7	23099051	ENSG00000122550	KLHL7	0.502604	0.00446988	0.0111002
chr7	23107761	ENSG00000122550	KLHL7	0.532786	0.00182342	0.007413
chr7	23108377	ENSG00000122550	KLHL7	0.566608	0.00257186	0.00730888
chr7	23115191	ENSG00000122550	KLHL7	0.535159	0.00207888	0.00529098
chr7	23116438	ENSG00000122550	KLHL7	0.533153	0.00270723	0.00553353
chr7	23123286	ENSG00000122550	KLHL7	0.540312	0.0044425	0.00891512
chr7	23125868	ENSG00000122550	KLHL7	0.598425	0.00326852	0.00396483
chr7	23129361	ENSG00000122550	KLHL7	0.50263	0.00993431	0.0159014
chr7	23131300	ENSG00000122550	KLHL7	0.643296	0.00309514	0.00269587
chr7	23141448	ENSG00000122550	KLHL7	0.564256	0.00321428	0.00624215
chr7	23147506	ENSG00000122550	KLHL7	0.687329	0.00403257	0.0036643
chr7	23147931	ENSG00000122550	KLHL7	0.50721	0.00385134	0.00618401
chr7	23152949	ENSG00000122550	KLHL7	0.510684	0.00377728	0.00611819
chr7	23159029	ENSG00000122550	KLHL7	0.515672	0.00611566	0.0086159
chr7	23168654	ENSG00000122550	KLHL7	0.516475	0.00315255	0.00539028
chr7	23175767	ENSG00000122550	KLHL7	0.614801	0.00233383	0.00291708
chr7	23176069	ENSG00000122550	KLHL7	0.558659	0.00258606	0.0034597
chr7	23176207	ENSG00000122550	KLHL7	0.575774	0.00250148	0.00426496
chr7	23176768	ENSG00000122550	KLHL7	0.577299	0.00466473	0.00361102
chr7	23183482	ENSG00000122550	KLHL7	0.589874	0.0021983	0.0206587
chr7	23183699	ENSG00000122550	KLHL7	0.519355	0.00194616	0.00760649
chr7	23184311	ENSG00000122550	KLHL7	0.55736	0.0015972	0.00596349
chr7	25613626	ENSG00000223561	AC003090.1	0.569996	0.00642969	0.0408161
chr7	44485628	ENSG00000015676	NUDCD3	0.515535	0.0709661	0.775273
chr7	44578012	ENSG00000158604	TMED4	0.691655	0.00563148	0.00288781
chr7	56063382	ENSG00000146731	CCT6A	0.926682	0.100258	0.00125998
chr7	76625914	ENSG00000205485	AC004980.7	0.505482	0.450343	0.75725
chr7	88276449	ENSG00000127954	STEAP4	0.921781	0.0762762	0.000994727
chr7	92070183	ENSG00000127914	AKAP9	0.796572	0.205724	0.976024
chr8	116637604	ENSG00000147677	EIF3H	0.505	0.0051503	0.0116662
chr8	116642617	ENSG00000147677	EIF3H	0.60746	0.00523679	0.00627191
chr8	116657876	ENSG00000147677	EIF3H	0.605382	0.00607779	0.0136797
chr8	116664203	ENSG00000147677	EIF3H	0.52483	0.00393223	0.0135839
chr8	116668099	ENSG00000147677	EIF3H	0.517811	0.0028137	0.00557502
chr8	116671462	ENSG00000147677	EIF3H	0.545325	0.00207384	0.00633739
chr8	116673843	ENSG00000147677	EIF3H	0.515622	0.0279926	0.00302733
chr8	116685849	ENSG00000147677	EIF3H	0.574691	0.00343327	0.0183741
chr8	116689746	ENSG00000147677	EIF3H	0.512064	0.00168835	0.0047864
chr8	116690217	ENSG00000147677	EIF3H	0.506181	0.00126963	0.00551861
chr8	116706098	ENSG00000147677	EIF3H	0.516529	0.00248999	0.00685368
chr8	116711824	ENSG00000147677	EIF3H	0.565734	0.00300584	0.00970869
chr8	116718130	ENSG00000147677	EIF3H	0.510859	0.00329516	0.00603272
chr8	116722154	ENSG00000147677	EIF3H	0.520007	0.00213954	0.00337484
chr8	116722277	ENSG00000147677	EIF3H	0.504031	0.00184967	0.00281151
chr8	116722830	ENSG00000147677	EIF3H	0.526262	0.0319004	0.00404104
chr8	116768340	ENSG00000147677	EIF3H	0.503489	0.00222718	0.00607398
chr8	116768523	ENSG00000147677	EIF3H	0.506087	0.00182007	0.00532759
chr8	141274864	ENSG00000022567	SLC45A4	0.523191	0.00182682	0.0218599
chr8	141277291	ENSG00000022567	SLC45A4	0.565531	0.00136382	0.0152777
chr8	141285071	ENSG00000022567	SLC45A4	0.512092	0.00209412	0.020026
chr8	141294657	ENSG00000022567	SLC45A4	0.610707	0.000978489	0.0161997
chr8	141310049	ENSG00000022567	SLC45A4	0.511882	0.0062448	0.0364155
chr8	142206389	ENSG00000171045	TSNARE1	0.618348	0.00684192	0.00851938
chr8	142210588	ENSG00000171045	TSNARE1	0.612732	0.00286153	0.00584678
chr8	142215705	ENSG00000171045	TSNARE1	0.537536	0.00211407	0.00388544
chr8	142218898	ENSG00000171045	TSNARE1	0.59269	0.105207	0.0138759
chr8	142228108	ENSG00000171045	TSNARE1	0.547622	0.0272025	0.00357466
chr8	142229453	ENSG00000171045	TSNARE1	0.545844	0.0014581	0.00300395
chr8	142232167	ENSG00000171045	TSNARE1	0.578454	0.00312169	0.00360503
chr8	142234921	ENSG00000171045	TSNARE1	0.545093	0.00200345	0.00333217
chr8	142250855	ENSG00000171045	TSNARE1	0.561928	0.0205562	0.00274033
chr8	142253435	ENSG00000171045	TSNARE1	0.562268	0.966543	0.00376593
chr8	142258652	ENSG00000171045	TSNARE1	0.50044	0.00226408	0.00378377
chr8	142267443	ENSG00000171045	TSNARE1	0.630233	0.00248192	0.00399891
chr8	142272770	ENSG00000171045	TSNARE1	0.500889	0.00181481	0.00308403
chr8	142273991	ENSG00000171045	TSNARE1	0.569865	0.00261492	0.00332615
chr8	142276093	ENSG00000171045	TSNARE1	0.55624	0.969284	0.00407159
chr8	142279827	ENSG00000171045	TSNARE1	0.550209	0.00357601	0.0037275
chr8	142280097	ENSG00000171045	TSNARE1	0.793295	0.999974	0.000457624
chr8	142285568	ENSG00000171045	TSNARE1	0.536857	0.00237059	0.00351073
chr8	142286009	ENSG00000171045	TSNARE1	0.531193	0.974704	0.00713992
chr8	142291945	ENSG00000171045	TSNARE1	0.566872	0.00254692	0.00336333
chr8	142292775	ENSG00000171045	TSNARE1	0.559003	0.00268309	0.00354808
chr8	142293163	ENSG00000171045	TSNARE1	0.520803	0.969822	0.00323074
chr8	142294986	ENSG00000171045	TSNARE1	0.513254	0.00250865	0.00477045
chr8	142297790	ENSG00000171045	TSNARE1	0.556105	0.00305346	0.00356456
chr8	142298476	ENSG00000171045	TSNARE1	0.552676	0.00265474	0.00371246
chr8	142299182	ENSG00000171045	TSNARE1	0.532455	0.00304538	0.00469212
chr8	142303907	ENSG00000171045	TSNARE1	0.588597	0.00150606	0.00306567
chr8	142304973	ENSG00000171045	TSNARE1	0.556523	0.00205966	0.00298208
chr8	142304996	ENSG00000171045	TSNARE1	0.556561	0.00198862	0.00343597
chr8	142307523	ENSG00000171045	TSNARE1	0.527057	0.960781	0.00413065
chr8	142308256	ENSG00000171045	TSNARE1	0.570778	0.00242447	0.00229248
chr8	142309750	ENSG00000171045	TSNARE1	0.580569	0.00246953	0.00349249
chr8	142319882	ENSG00000171045	TSNARE1	0.519053	0.00212595	0.00287607
chr8	142323319	ENSG00000171045	TSNARE1	0.518336	0.00185699	0.00234282
chr8	142323802	ENSG00000171045	TSNARE1	0.603239	0.00306135	0.00350462
chr8	142324026	ENSG00000171045	TSNARE1	0.592116	0.00420882	0.00482504
chr8	142328728	ENSG00000171045	TSNARE1	0.70764	0.970886	0.00146826
chr8	142330335	ENSG00000171045	TSNARE1	0.585613	0.00233683	0.00296985
chr8	142330764	ENSG00000171045	TSNARE1	0.536759	0.00274906	0.00282128
chr8	142331661	ENSG00000171045	TSNARE1	0.590185	0.0021127	0.00273128
chr8	142333622	ENSG00000171045	TSNARE1	0.546828	0.00176622	0.00261622
chr8	142335206	ENSG00000171045	TSNARE1	0.50308	0.00231723	0.00291708
chr8	142338990	ENSG00000171045	TSNARE1	0.545149	0.00219527	0.00390398
chr8	142340042	ENSG00000171045	TSNARE1	0.557023	0.00241804	0.0230691
chr8	142354833	ENSG00000171045	TSNARE1	0.511657	0.00269378	0.00512168
chr8	142355203	ENSG00000171045	TSNARE1	0.549477	0.00301393	0.00353379
chr8	142358783	ENSG00000171045	TSNARE1	0.526161	0.0251322	0.00418224
chr8	142361723	ENSG00000171045	TSNARE1	0.559287	0.00195204	0.00413345
chr8	142362912	ENSG00000171045	TSNARE1	0.624658	0.971754	0.00389831
chr8	142363682	ENSG00000171045	TSNARE1	0.59721	0.00204702	0.00408697
chr8	142368827	ENSG00000171045	TSNARE1	0.603175	0.00142671	0.00365506
chr8	142369203	ENSG00000171045	TSNARE1	0.520225	0.961066	0.00333841
chr8	142372183	ENSG00000171045	TSNARE1	0.523578	0.00251674	0.0150866
chr8	142372569	ENSG00000171045	TSNARE1	0.55204	0.00248753	0.00393568
chr8	142378978	ENSG00000171045	TSNARE1	0.547392	0.00168372	0.00322116
chr8	142379001	ENSG00000171045	TSNARE1	0.568689	0.00161343	0.00359201
chr8	142379415	ENSG00000171045	TSNARE1	0.516005	0.00158262	0.00308141
chr8	142381251	ENSG00000171045	TSNARE1	0.525123	0.00134476	0.0164898
chr8	142381741	ENSG00000171045	TSNARE1	0.573599	0.00148179	0.00380961
chr8	142381888	ENSG00000171045	TSNARE1	0.559676	0.0209118	0.00293759
chr8	142384692	ENSG00000171045	TSNARE1	0.509986	0.00187212	0.00430589
chr8	142390105	ENSG00000171045	TSNARE1	0.527078	0.00272967	0.00423354
chr8	142391705	ENSG00000171045	TSNARE1	0.550497	0.00265366	0.00394598
chr8	142393995	ENSG00000171045	TSNARE1	0.518069	0.00174483	0.00367557
chr8	142398252	ENSG00000171045	TSNARE1	0.504548	0.00299411	0.00803068
chr8	142408236	ENSG00000171045	TSNARE1	0.504451	0.00197748	0.00545231
chr8	143375222	ENSG00000158106	RHPN1	0.549707	0.00226555	0.00442285
chr8	143377463	ENSG00000158106	RHPN1	0.624207	0.0486158	0.886649
chr8	143383289	ENSG00000158106	RHPN1	0.638756	0.00233782	0.00532832
chr8	143383290	ENSG00000158106	RHPN1	0.609403	0.00174059	0.0039876
chr8	143384042	ENSG00000158106	RHPN1	0.622182	0.00134697	0.00339115
chr8	143392653	ENSG00000158106	RHPN1	0.518824	0.00231511	0.00555716
chr8	143566574	ENSG00000147813	NAPRT	0.558468	0.00307659	0.0172908
chr8	143567831	ENSG00000147813	NAPRT	0.59169	0.0112463	0.094287
chr8	143569782	ENSG00000147813	NAPRT	0.683164	0.00385576	0.37362
chr8	143569986	ENSG00000147813	NAPRT	0.62624	0.00114497	0.0317592
chr8	143570962	ENSG00000147813	NAPRT	0.602166	0.0088326	0.0868054
chr8	143572260	ENSG00000147813	NAPRT	0.56327	0.966927	0.00654651
chr8	143572878	ENSG00000147813	NAPRT	0.549605	0.00298373	0.00801183
chr8	143573672	ENSG00000147813	NAPRT	0.590787	0.00133786	0.00330985
chr8	143575242	ENSG00000147813	NAPRT	0.50854	0.00347854	0.039039
chr8	143576291	ENSG00000147813	NAPRT	0.530994	0.00467284	0.0110444
chr8	143576308	ENSG00000147813	NAPRT	0.50306	0.00295469	0.00725414
chr8	143577855	ENSG00000147813	NAPRT	0.57904	0.177943	0.747016
chr8	143579350	ENSG00000147813	NAPRT	0.535727	0.00102557	0.00570231
chr8	143584616	ENSG00000147813	NAPRT	0.514045	0.0017345	0.00381629
chr8	17915961	ENSG00000078674	PCM1	0.576138	0.00100555	0.00355872
chr8	17928168	ENSG00000078674	PCM1	0.528689	0.00148967	0.00610952
chr8	17928191	ENSG00000078674	PCM1	0.537722	0.00190946	0.137326
chr8	17941730	ENSG00000078674	PCM1	0.505906	0.00675334	0.0165526
chr8	17949690	ENSG00000078674	PCM1	0.524648	0.00244004	0.0192734
chr8	17953162	ENSG00000078674	PCM1	0.647127	0.0335757	0.561963
chr8	17961662	ENSG00000078674	PCM1	0.521048	0.00266198	0.0060134
chr8	17964968	ENSG00000078674	PCM1	0.527424	0.00282537	0.0260251
chr8	17980704	ENSG00000078674	PCM1	0.885057	0.983148	0.178957
chr8	17994673	ENSG00000078674	PCM1	0.525548	0.0020691	0.0163634
chr8	38139758	ENSG00000129691	ASH2L	0.571623	0.00467587	0.00611443
chr8	55825425	ENSG00000137574	TGS1	0.997462	0.0777691	0.00844268
chr8	60515908	ENSG00000104388	RAB2A	0.505893	0.00310785	0.031126
chr8	60519764	ENSG00000104388	RAB2A	0.545163	0.0009084	0.0362454
chr8	60525133	ENSG00000104388	RAB2A	0.571976	0.00141703	0.0328954
chr8	60545497	ENSG00000104388	RAB2A	0.539905	0.000668805	0.00354927
chr8	60586058	ENSG00000104388	RAB2A	0.548628	0.00405452	0.0334194
chr8	60604859	ENSG00000104388	RAB2A	0.589708	0.00152659	0.0176723
chr8	60612894	ENSG00000104388	RAB2A	0.529438	0.00255151	0.0278545
chr8	60618801	ENSG00000104388	RAB2A	0.554909	0.00257864	0.0077936
chr8	60622284	ENSG00000104388	RAB2A	0.547336	0.00251149	0.00445141
chr8	65740624	ENSG00000205268	PDE7A	0.50722	0.00393608	0.00365025
chr8	65767883	ENSG00000205268	PDE7A	0.541745	0.00335635	0.00575982
chr8	65810044	ENSG00000205268	PDE7A	0.51789	0.00252636	0.0218967
chr8	710104	ENSG00000104714	ERICH1	0.524788	0.00242051	0.00337155
chr8	721656	ENSG00000104714	ERICH1	0.570353	0.00115045	0.00423126
chr8	73295822	ENSG00000147604	RPL7	0.519513	0.032957	0.0313879
chr8	76982087	ENSG00000164751	PEX2	0.993527	0.0391267	0.000900276
chr8	76982942	ENSG00000164751	PEX2	0.943085	0.0447348	0.00166626
chr8	80027483	ENSG00000076554	TPD52	0.528586	0.00147795	0.0205552
chr8	80030941	ENSG00000076554	TPD52	0.503609	0.00210085	0.0250584
chr8	80035507	ENSG00000076554	TPD52	0.676894	0.00629101	0.0522767
chr8	80041606	ENSG00000076554	TPD52	0.501601	0.00265744	0.00551754
chr8	80056918	ENSG00000076554	TPD52	0.52518	0.00178984	0.0190386
chr8	80059011	ENSG00000076554	TPD52	0.532433	0.00112114	0.0212765
chr8	80060890	ENSG00000076554	TPD52	0.511907	0.0017602	0.00324948
chr8	80092316	ENSG00000076554	TPD52	0.542396	0.00142487	0.00382799
chr8	80105792	ENSG00000076554	TPD52	0.515077	0.00295932	0.0216531
chr8	80127546	ENSG00000076554	TPD52	0.517334	0.00225746	0.0250842
chr8	80142394	ENSG00000076554	TPD52	0.540172	0.00109535	0.00535423
chr8	80165256	ENSG00000076554	TPD52	0.539498	0.00160414	0.00692688
chr8	80198611	ENSG00000076554	TPD52	0.50297	0.00379453	0.00919774
chr8	91076923	ENSG00000253738	OTUD6B-AS1	0.500682	0.0663075	0.0514997
chr8	92051300	ENSG00000079102	RUNX1T1	0.518494	0.00193709	0.0305489
chr8	92099837	ENSG00000079102	RUNX1T1	0.605819	0.00653557	0.0778163
chr8	96225636	ENSG00000156467	UQCRB	0.648581	0.00250071	0.0303172
chr8	96228233	ENSG00000156467	UQCRB	0.941391	0.397906	0.0294488

## Sheet: Table S5
Supplementary Table 5. The metadata of the 1,234 GWAS summary statistics from the UK Biobank (UKBB) and literature.
#Trait_ID: Trait ID of GWAS summary statistics, defined in UKBB. For GWAS summary statistics collected from literatures, we used trait ID defined in previous paper (https://doi.org/10.1101/2023.02.28.23286554).
#Trait description: trait description of each trait ID.
#Sample_Size: The total number of subjects involved in each GWAS.
#N_controls: The number of control subjects in each GWAS, only available for binary traits.
#N_cases: The number of case subjects in each GWAS, only available for binary traits.
#Sex: indicates whether subjects of both male and female were involved or only one were considered.
#Resource: the resource where the GWAS summary data collected.
#File_Names/Links: The specific filename of each GWAS data for data collected UKBB or links for data collected from literatures.
#No_Genes_coloc_3'aQTL: the number of genes with evidence of colocalization in each trait with 3'aQTL in any tissues.
Trait_ID	Trait description	Sample_Size	N_controls	N_cases	Sex	Resource	File_Names/Links	No_Genes_coloc_3'aQTL
100002_irnt	Energy	51453	NA	NA	both_sexes	UKBB	100002_irnt.gwas.imputed_v3.both_sexes.tsv.bgz	0
100011_irnt	Iron	51453	NA	NA	both_sexes	UKBB	100011_irnt.gwas.imputed_v3.both_sexes.tsv.bgz	0
100012_irnt	Vitamin B6	51453	NA	NA	both_sexes	UKBB	100012_irnt.gwas.imputed_v3.both_sexes.tsv.bgz	0
100022	Alcohol	51453	NA	NA	both_sexes	UKBB	100022.gwas.imputed_v3.both_sexes.tsv.bgz	0
100024_irnt	Calcium	51453	NA	NA	both_sexes	UKBB	100024_irnt.gwas.imputed_v3.both_sexes.tsv.bgz	0
1001	Duration of strenuous sports	36919	NA	NA	both_sexes	UKBB	1001.gwas.imputed_v3.both_sexes.tsv.bgz	0
100150	Drinking water intake	51427	NA	NA	both_sexes	UKBB	100150.gwas.imputed_v3.both_sexes.tsv.bgz	0
100240	Coffee consumed	51427	15109	36318	both_sexes	UKBB	100240.gwas.imputed_v3.both_sexes.tsv.bgz	0
100250	Instant coffee intake	51427	NA	NA	both_sexes	UKBB	100250.gwas.imputed_v3.both_sexes.tsv.bgz	0
100270	Filtered coffee intake	51427	NA	NA	both_sexes	UKBB	100270.gwas.imputed_v3.both_sexes.tsv.bgz	2
100280	Added milk to filtered coffee	51427	6758	44669	both_sexes	UKBB	100280.gwas.imputed_v3.both_sexes.tsv.bgz	0
100370	Intake of sugar added to coffee	51427	NA	NA	both_sexes	UKBB	100370.gwas.imputed_v3.both_sexes.tsv.bgz	0
100390	Tea consumed	51427	10349	41078	both_sexes	UKBB	100390.gwas.imputed_v3.both_sexes.tsv.bgz	0
100400	Standard tea intake	51427	NA	NA	both_sexes	UKBB	100400.gwas.imputed_v3.both_sexes.tsv.bgz	0
100460	Added milk to standard tea	51427	33741	17686	both_sexes	UKBB	100460.gwas.imputed_v3.both_sexes.tsv.bgz	0
100520	Milk intake	51413	NA	NA	both_sexes	UKBB	100520.gwas.imputed_v3.both_sexes.tsv.bgz	0
100580	Alcohol consumed	51427	25991	25436	both_sexes	UKBB	100580.gwas.imputed_v3.both_sexes.tsv.bgz	0
100630	Rose wine intake	51427	NA	NA	both_sexes	UKBB	100630.gwas.imputed_v3.both_sexes.tsv.bgz	0
100670	White wine intake	51427	NA	NA	both_sexes	UKBB	100670.gwas.imputed_v3.both_sexes.tsv.bgz	0
100710	Beer/cider intake	51427	NA	NA	both_sexes	UKBB	100710.gwas.imputed_v3.both_sexes.tsv.bgz	0
100920_2105	Type milk consumed: soya with calcium	51427	49881	1546	both_sexes	UKBB	100920_2105.gwas.imputed_v3.both_sexes.tsv.bgz	0
1011	Frequency of light DIY in last 4 weeks	180494	NA	NA	both_sexes	UKBB	1011.gwas.imputed_v3.both_sexes.tsv.bgz	0
1021	Duration of light DIY	179548	NA	NA	both_sexes	UKBB	1021.gwas.imputed_v3.both_sexes.tsv.bgz	0
102130	Dessert consumers	51427	34809	16618	both_sexes	UKBB	102130.gwas.imputed_v3.both_sexes.tsv.bgz	0
102330	Sweets intake	51427	NA	NA	both_sexes	UKBB	102330.gwas.imputed_v3.both_sexes.tsv.bgz	0
102360	Sweet biscuits intake	51427	NA	NA	both_sexes	UKBB	102360.gwas.imputed_v3.both_sexes.tsv.bgz	0
102400	Savoury snack consumers	51427	33092	18335	both_sexes	UKBB	102400.gwas.imputed_v3.both_sexes.tsv.bgz	0
102800	Cheese consumers	51427	28182	23245	both_sexes	UKBB	102800.gwas.imputed_v3.both_sexes.tsv.bgz	0
102840	Blue cheese intake	51422	NA	NA	both_sexes	UKBB	102840.gwas.imputed_v3.both_sexes.tsv.bgz	0
102_irnt	Pulse rate, automated reading	340162	NA	NA	both_sexes	UKBB	102_irnt.gwas.imputed_v3.both_sexes.tsv.bgz	872
103020	Beef intake	51422	NA	NA	both_sexes	UKBB	103020.gwas.imputed_v3.both_sexes.tsv.bgz	0
1031	Frequency of friend/family visits	358821	NA	NA	both_sexes	UKBB	1031.gwas.imputed_v3.both_sexes.tsv.bgz	0
103250	Vegetarian alternatives intake	51427	49621	1806	both_sexes	UKBB	103250.gwas.imputed_v3.both_sexes.tsv.bgz	3
103990	Vegetable consumers	51427	9068	42359	both_sexes	UKBB	103990.gwas.imputed_v3.both_sexes.tsv.bgz	2
104450	Apple intake	51427	NA	NA	both_sexes	UKBB	104450.gwas.imputed_v3.both_sexes.tsv.bgz	0
104460	Banana intake	51427	NA	NA	both_sexes	UKBB	104460.gwas.imputed_v3.both_sexes.tsv.bgz	0
104920	Time spent doing light physical activity	51427	NA	NA	both_sexes	UKBB	104920.gwas.imputed_v3.both_sexes.tsv.bgz	0
1050	Time spend outdoors in summer	327717	NA	NA	both_sexes	UKBB	1050.gwas.imputed_v3.both_sexes.tsv.bgz	77
1060	Time spent outdoors in winter	284889	NA	NA	both_sexes	UKBB	1060.gwas.imputed_v3.both_sexes.tsv.bgz	7
1070	Time spent watching television (TV)	341859	NA	NA	both_sexes	UKBB	1070.gwas.imputed_v3.both_sexes.tsv.bgz	113
1080	Time spent using computer	280750	NA	NA	both_sexes	UKBB	1080.gwas.imputed_v3.both_sexes.tsv.bgz	20
1090	Time spent driving	241357	NA	NA	both_sexes	UKBB	1090.gwas.imputed_v3.both_sexes.tsv.bgz	65
1100	Drive faster than motorway speed limit	327192	NA	NA	both_sexes	UKBB	1100.gwas.imputed_v3.both_sexes.tsv.bgz	5
110001	Invitation to complete online 24-hour recall dietary questionnaire, acceptance	218234	70065	148169	both_sexes	UKBB	110001.gwas.imputed_v3.both_sexes.tsv.bgz	0
1110	Length of mobile phone use	356618	NA	NA	both_sexes	UKBB	1110.gwas.imputed_v3.both_sexes.tsv.bgz	7
1120	Weekly usage of mobile phone in last 3 months	301157	NA	NA	both_sexes	UKBB	1120.gwas.imputed_v3.both_sexes.tsv.bgz	0
1130	Hands-free device/speakerphone use with mobile phone in last 3 month	302733	NA	NA	both_sexes	UKBB	1130.gwas.imputed_v3.both_sexes.tsv.bgz	1
1140	Difference in mobile phone use compared to two years previously	298239	NA	NA	both_sexes	UKBB	1140.gwas.imputed_v3.both_sexes.tsv.bgz	0
1150_1	Usual side of head for mobile phone use: Left	303009	195207	107802	both_sexes	UKBB	1150_1.gwas.imputed_v3.both_sexes.tsv.bgz	226
1150_2	Usual side of head for mobile phone use: Right	303009	127654	175355	both_sexes	UKBB	1150_2.gwas.imputed_v3.both_sexes.tsv.bgz	0
1160	Sleep duration	359020	NA	NA	both_sexes	UKBB	1160.gwas.imputed_v3.both_sexes.tsv.bgz	104
1170	Getting up in morning	360231	NA	NA	both_sexes	UKBB	1170.gwas.imputed_v3.both_sexes.tsv.bgz	60
1180	Morning/evening person (chronotype)	322488	NA	NA	both_sexes	UKBB	1180.gwas.imputed_v3.both_sexes.tsv.bgz	245
1210	Snoring	336320	210664	125656	both_sexes	UKBB	1210.gwas.imputed_v3.both_sexes.tsv.bgz	37
1220	Daytime dozing / sleeping (narcolepsy)	359752	NA	NA	both_sexes	UKBB	1220.gwas.imputed_v3.both_sexes.tsv.bgz	15
12336_irnt	Ventricular rate	10817	NA	NA	both_sexes	UKBB	12336_irnt.gwas.imputed_v3.both_sexes.tsv.bgz	0
12340_irnt	QRS duration	10815	NA	NA	both_sexes	UKBB	12340_irnt.gwas.imputed_v3.both_sexes.tsv.bgz	22
1249	Past tobacco smoking	332141	NA	NA	both_sexes	UKBB	1249.gwas.imputed_v3.both_sexes.tsv.bgz	112
1279	Exposure to tobacco smoke outside home	306191	NA	NA	both_sexes	UKBB	1279.gwas.imputed_v3.both_sexes.tsv.bgz	0
1289	Cooked vegetable intake	350404	NA	NA	both_sexes	UKBB	1289.gwas.imputed_v3.both_sexes.tsv.bgz	6
1299	Salad / raw vegetable intake	339601	NA	NA	both_sexes	UKBB	1299.gwas.imputed_v3.both_sexes.tsv.bgz	9
129_irnt	Place of birth in UK - north co-ordinate	338701	NA	NA	both_sexes	UKBB	129_irnt.gwas.imputed_v3.both_sexes.tsv.bgz	18
1309	Fresh fruit intake	348284	NA	NA	both_sexes	UKBB	1309.gwas.imputed_v3.both_sexes.tsv.bgz	37
130_irnt	Place of birth in UK - east co-ordinate	338701	NA	NA	both_sexes	UKBB	130_irnt.gwas.imputed_v3.both_sexes.tsv.bgz	8
1319	Dried fruit intake	329134	NA	NA	both_sexes	UKBB	1319.gwas.imputed_v3.both_sexes.tsv.bgz	42
1329	Oily fish intake	359340	NA	NA	both_sexes	UKBB	1329.gwas.imputed_v3.both_sexes.tsv.bgz	43
1339	Non-oily fish intake	359682	NA	NA	both_sexes	UKBB	1339.gwas.imputed_v3.both_sexes.tsv.bgz	70
134	Number of self-reported cancers	361136	NA	NA	both_sexes	UKBB	134.gwas.imputed_v3.both_sexes.tsv.bgz	8
1349	Processed meat intake	360468	NA	NA	both_sexes	UKBB	1349.gwas.imputed_v3.both_sexes.tsv.bgz	33
1359	Poultry intake	360390	NA	NA	both_sexes	UKBB	1359.gwas.imputed_v3.both_sexes.tsv.bgz	2
1369	Beef intake	359784	NA	NA	both_sexes	UKBB	1369.gwas.imputed_v3.both_sexes.tsv.bgz	31
1379	Lamb/mutton intake	359002	NA	NA	both_sexes	UKBB	1379.gwas.imputed_v3.both_sexes.tsv.bgz	12
1389	Pork intake	359115	NA	NA	both_sexes	UKBB	1389.gwas.imputed_v3.both_sexes.tsv.bgz	1
1408	Cheese intake	352458	NA	NA	both_sexes	UKBB	1408.gwas.imputed_v3.both_sexes.tsv.bgz	70
1418_1	Milk type used: Full cream	360806	337904	22902	both_sexes	UKBB	1418_1.gwas.imputed_v3.both_sexes.tsv.bgz	222
1418_3	Milk type used: Skimmed	360806	286719	74087	both_sexes	UKBB	1418_3.gwas.imputed_v3.both_sexes.tsv.bgz	68
1418_4	Milk type used: Soya	360806	347659	13147	both_sexes	UKBB	1418_4.gwas.imputed_v3.both_sexes.tsv.bgz	0
1418_6	Milk type used: Never/rarely have milk	360806	349219	11587	both_sexes	UKBB	1418_6.gwas.imputed_v3.both_sexes.tsv.bgz	4
1428_0	Spread type: Never/rarely use spread	360291	323712	36579	both_sexes	UKBB	1428_0.gwas.imputed_v3.both_sexes.tsv.bgz	0
1428_1	Spread type: Butter/spreadable butter	360291	229101	131190	both_sexes	UKBB	1428_1.gwas.imputed_v3.both_sexes.tsv.bgz	4
1428_2	Spread type: Flora Pro-Active/Benecol	360291	358362	1929	both_sexes	UKBB	1428_2.gwas.imputed_v3.both_sexes.tsv.bgz	0
1428_3	Spread type: Other type of spread/margarine	360291	169698	190593	both_sexes	UKBB	1428_3.gwas.imputed_v3.both_sexes.tsv.bgz	4
1438_irnt	Bread intake	353030	NA	NA	both_sexes	UKBB	1438_irnt.gwas.imputed_v3.both_sexes.tsv.bgz	22
1448_1	Bread type: White	348424	256972	91452	both_sexes	UKBB	1448_1.gwas.imputed_v3.both_sexes.tsv.bgz	14
1448_3	Bread type: Wholemeal or wholegrain	348424	147411	201013	both_sexes	UKBB	1448_3.gwas.imputed_v3.both_sexes.tsv.bgz	16
1448_4	Bread type: Other type of bread	348424	333983	14441	both_sexes	UKBB	1448_4.gwas.imputed_v3.both_sexes.tsv.bgz	42
1458	Cereal intake	345019	NA	NA	both_sexes	UKBB	1458.gwas.imputed_v3.both_sexes.tsv.bgz	67
1468_1	Cereal type: Bran cereal (e.g. All Bran, Branflakes)	299898	249289	50609	both_sexes	UKBB	1468_1.gwas.imputed_v3.both_sexes.tsv.bgz	4
1468_2	Cereal type: Biscuit cereal (e.g. Weetabix)	299898	246588	53310	both_sexes	UKBB	1468_2.gwas.imputed_v3.both_sexes.tsv.bgz	4
1468_3	Cereal type: Oat cereal (e.g. Ready Brek, porridge)	299898	223547	76351	both_sexes	UKBB	1468_3.gwas.imputed_v3.both_sexes.tsv.bgz	2
1468_4	Cereal type: Muesli	299898	238375	61523	both_sexes	UKBB	1468_4.gwas.imputed_v3.both_sexes.tsv.bgz	56
1468_5	Cereal type: Other (e.g. Cornflakes, Frosties)	299898	241793	58105	both_sexes	UKBB	1468_5.gwas.imputed_v3.both_sexes.tsv.bgz	12
1478	Salt added to food	360954	NA	NA	both_sexes	UKBB	1478.gwas.imputed_v3.both_sexes.tsv.bgz	71
1488_irnt	Tea intake	349376	NA	NA	both_sexes	UKBB	1488_irnt.gwas.imputed_v3.both_sexes.tsv.bgz	98
1498	Coffee intake	334659	NA	NA	both_sexes	UKBB	1498.gwas.imputed_v3.both_sexes.tsv.bgz	72
1508_1	Coffee type: Decaffeinated coffee (any type)	283449	228139	55310	both_sexes	UKBB	1508_1.gwas.imputed_v3.both_sexes.tsv.bgz	0
1508_2	Coffee type: Instant coffee	283449	125063	158386	both_sexes	UKBB	1508_2.gwas.imputed_v3.both_sexes.tsv.bgz	0
1508_3	Coffee type: Ground coffee (include espresso, filter etc)	283449	218487	64962	both_sexes	UKBB	1508_3.gwas.imputed_v3.both_sexes.tsv.bgz	14
1518	Hot drink temperature	357256	NA	NA	both_sexes	UKBB	1518.gwas.imputed_v3.both_sexes.tsv.bgz	33
1528	Water intake	333363	NA	NA	both_sexes	UKBB	1528.gwas.imputed_v3.both_sexes.tsv.bgz	124
1538_0	Major dietary changes in the last 5 years: No	360294	138926	221368	both_sexes	UKBB	1538_0.gwas.imputed_v3.both_sexes.tsv.bgz	132
1538_1	Major dietary changes in the last 5 years: Yes, because of illness	360294	322243	38051	both_sexes	UKBB	1538_1.gwas.imputed_v3.both_sexes.tsv.bgz	2
1538_2	Major dietary changes in the last 5 years: Yes, because of other reasons	360294	259419	100875	both_sexes	UKBB	1538_2.gwas.imputed_v3.both_sexes.tsv.bgz	40
1548	Variation in diet	359752	NA	NA	both_sexes	UKBB	1548.gwas.imputed_v3.both_sexes.tsv.bgz	50
1558	Alcohol intake frequency.	360726	NA	NA	both_sexes	UKBB	1558.gwas.imputed_v3.both_sexes.tsv.bgz	349
1568	Average weekly red wine intake	257773	NA	NA	both_sexes	UKBB	1568.gwas.imputed_v3.both_sexes.tsv.bgz	44
1578	Average weekly champagne plus white wine intake	257623	NA	NA	both_sexes	UKBB	1578.gwas.imputed_v3.both_sexes.tsv.bgz	1
1588	Average weekly beer plus cider intake	258256	NA	NA	both_sexes	UKBB	1588.gwas.imputed_v3.both_sexes.tsv.bgz	45
1598	Average weekly spirits intake	257426	NA	NA	both_sexes	UKBB	1598.gwas.imputed_v3.both_sexes.tsv.bgz	1
1618	Alcohol usually taken with meals	184716	59552	125164	both_sexes	UKBB	1618.gwas.imputed_v3.both_sexes.tsv.bgz	39
1628	Alcohol intake versus 10 years previously	334989	NA	NA	both_sexes	UKBB	1628.gwas.imputed_v3.both_sexes.tsv.bgz	7
1677	Breastfed as a baby	273743	79905	193838	both_sexes	UKBB	1677.gwas.imputed_v3.both_sexes.tsv.bgz	0
1687	Comparative body size at age 10	354996	NA	NA	both_sexes	UKBB	1687.gwas.imputed_v3.both_sexes.tsv.bgz	296
1697	Comparative height size at age 10	355331	NA	NA	both_sexes	UKBB	1697.gwas.imputed_v3.both_sexes.tsv.bgz	1227
1707_1	Handedness (chirality/laterality): Right-handed	360913	40671	320242	both_sexes	UKBB	1707_1.gwas.imputed_v3.both_sexes.tsv.bgz	0
1707_2	Handedness (chirality/laterality): Left-handed	360913	326328	34585	both_sexes	UKBB	1707_2.gwas.imputed_v3.both_sexes.tsv.bgz	2
1707_3	Handedness (chirality/laterality): Use both right and left hands equally	360913	354827	6086	both_sexes	UKBB	1707_3.gwas.imputed_v3.both_sexes.tsv.bgz	10
1717	Skin colour	356530	NA	NA	both_sexes	UKBB	1717.gwas.imputed_v3.both_sexes.tsv.bgz	241
1727	Ease of skin tanning	353697	NA	NA	both_sexes	UKBB	1727.gwas.imputed_v3.both_sexes.tsv.bgz	324
1737	Childhood sunburn occasions	269734	NA	NA	both_sexes	UKBB	1737.gwas.imputed_v3.both_sexes.tsv.bgz	115
1747_1	Hair colour (natural, before greying): Blonde	360270	319092	41178	both_sexes	UKBB	1747_1.gwas.imputed_v3.both_sexes.tsv.bgz	788
1747_2	Hair colour (natural, before greying): Red	360270	343655	16615	both_sexes	UKBB	1747_2.gwas.imputed_v3.both_sexes.tsv.bgz	138
1747_3	Hair colour (natural, before greying): Light brown	360270	212710	147560	both_sexes	UKBB	1747_3.gwas.imputed_v3.both_sexes.tsv.bgz	206
1747_4	Hair colour (natural, before greying): Dark brown	360270	225643	134627	both_sexes	UKBB	1747_4.gwas.imputed_v3.both_sexes.tsv.bgz	494
1747_5	Hair colour (natural, before greying): Black	360270	344461	15809	both_sexes	UKBB	1747_5.gwas.imputed_v3.both_sexes.tsv.bgz	240
1747_6	Hair colour (natural, before greying): Other	360270	355789	4481	both_sexes	UKBB	1747_6.gwas.imputed_v3.both_sexes.tsv.bgz	16
1757	Facial ageing	330409	NA	NA	both_sexes	UKBB	1757.gwas.imputed_v3.both_sexes.tsv.bgz	462
1767	Adopted as a child	360450	355292	5158	both_sexes	UKBB	1767.gwas.imputed_v3.both_sexes.tsv.bgz	0
1787	Maternal smoking around birth	309942	214760	95182	both_sexes	UKBB	1787.gwas.imputed_v3.both_sexes.tsv.bgz	4
1797	Father still alive	351538	270309	81229	both_sexes	UKBB	1797.gwas.imputed_v3.both_sexes.tsv.bgz	5
1807_irnt	Father's age at death	266231	NA	NA	both_sexes	UKBB	1807_irnt.gwas.imputed_v3.both_sexes.tsv.bgz	4
1835	Mother still alive	355029	214783	140246	both_sexes	UKBB	1835.gwas.imputed_v3.both_sexes.tsv.bgz	4
189_irnt	Townsend deprivation index at recruitment	360763	NA	NA	both_sexes	UKBB	189_irnt.gwas.imputed_v3.both_sexes.tsv.bgz	0
1920	Mood swings	352604	193622	158982	both_sexes	UKBB	1920.gwas.imputed_v3.both_sexes.tsv.bgz	54
1930	Miserableness	355182	203430	151752	both_sexes	UKBB	1930.gwas.imputed_v3.both_sexes.tsv.bgz	39
1940	Irritability	345231	248369	96862	both_sexes	UKBB	1940.gwas.imputed_v3.both_sexes.tsv.bgz	46
1950	Sensitivity / hurt feelings	350821	156066	194755	both_sexes	UKBB	1950.gwas.imputed_v3.both_sexes.tsv.bgz	108
1960	Fed-up feelings	353764	210432	143332	both_sexes	UKBB	1960.gwas.imputed_v3.both_sexes.tsv.bgz	9
1970	Nervous feelings	351829	268709	83120	both_sexes	UKBB	1970.gwas.imputed_v3.both_sexes.tsv.bgz	110
1980	Worrier / anxious feelings	351833	152370	199463	both_sexes	UKBB	1980.gwas.imputed_v3.both_sexes.tsv.bgz	109
1990	Tense / 'highly strung'	350159	289646	60513	both_sexes	UKBB	1990.gwas.imputed_v3.both_sexes.tsv.bgz	89
2000	Worry too long after embarrassment	346527	181217	165310	both_sexes	UKBB	2000.gwas.imputed_v3.both_sexes.tsv.bgz	51
20001_1003	Cancer code, self-reported: skin cancer	361141	360016	1125	both_sexes	UKBB	20001_1003.gwas.imputed_v3.both_sexes.tsv.bgz	2
20001_1022	Cancer code, self-reported: colon cancer/sigmoid cancer	361141	359927	1214	both_sexes	UKBB	20001_1022.gwas.imputed_v3.both_sexes.tsv.bgz	0
20001_1059	Cancer code, self-reported: malignant melanoma	361141	358243	2898	both_sexes	UKBB	20001_1059.gwas.imputed_v3.both_sexes.tsv.bgz	22
20001_1061	Cancer code, self-reported: basal cell carcinoma	361141	357700	3441	both_sexes	UKBB	20001_1061.gwas.imputed_v3.both_sexes.tsv.bgz	28
20002_1065	Non-cancer illness code, self-reported: hypertension	361141	267581	93560	both_sexes	UKBB	20002_1065.gwas.imputed_v3.both_sexes.tsv.bgz	930
20002_1072	Non-cancer illness code, self-reported: essential hypertension	361141	359483	1658	both_sexes	UKBB	20002_1072.gwas.imputed_v3.both_sexes.tsv.bgz	0
20002_1074	Non-cancer illness code, self-reported: angina	361141	349771	11370	both_sexes	UKBB	20002_1074.gwas.imputed_v3.both_sexes.tsv.bgz	18
20002_1075	Non-cancer illness code, self-reported: heart attack/myocardial infarction	361141	352902	8239	both_sexes	UKBB	20002_1075.gwas.imputed_v3.both_sexes.tsv.bgz	32
20002_1077	Non-cancer illness code, self-reported: heart arrhythmia	361141	359128	2013	both_sexes	UKBB	20002_1077.gwas.imputed_v3.both_sexes.tsv.bgz	0
20002_1093	Non-cancer illness code, self-reported: pulmonary embolism +/- dvt	361141	358142	2999	both_sexes	UKBB	20002_1093.gwas.imputed_v3.both_sexes.tsv.bgz	10
20002_1094	Non-cancer illness code, self-reported: deep venous thrombosis (dvt)	361141	353904	7237	both_sexes	UKBB	20002_1094.gwas.imputed_v3.both_sexes.tsv.bgz	54
20002_1111	Non-cancer illness code, self-reported: asthma	361141	319207	41934	both_sexes	UKBB	20002_1111.gwas.imputed_v3.both_sexes.tsv.bgz	296
20002_1112	Non-cancer illness code, self-reported: chronic obstructive airways disease/copd	361141	359856	1285	both_sexes	UKBB	20002_1112.gwas.imputed_v3.both_sexes.tsv.bgz	14
20002_1125	Non-cancer illness code, self-reported: pleurisy	361141	359921	1220	both_sexes	UKBB	20002_1125.gwas.imputed_v3.both_sexes.tsv.bgz	0
20002_1139	Non-cancer illness code, self-reported: oesophagitis/barretts oesophagus	361141	359997	1144	both_sexes	UKBB	20002_1139.gwas.imputed_v3.both_sexes.tsv.bgz	0
20002_1162	Non-cancer illness code, self-reported: cholelithiasis/gall stones	361141	355200	5941	both_sexes	UKBB	20002_1162.gwas.imputed_v3.both_sexes.tsv.bgz	114
20002_1196	Non-cancer illness code, self-reported: urinary tract infection/kidney infection	361141	359443	1698	both_sexes	UKBB	20002_1196.gwas.imputed_v3.both_sexes.tsv.bgz	0
20002_1197	Non-cancer illness code, self-reported: kidney stone/ureter stone/bladder stone	361141	358278	2863	both_sexes	UKBB	20002_1197.gwas.imputed_v3.both_sexes.tsv.bgz	2
20002_1201	Non-cancer illness code, self-reported: bladder problem (not cancer)	361141	359001	2140	both_sexes	UKBB	20002_1201.gwas.imputed_v3.both_sexes.tsv.bgz	0
20002_1202	Non-cancer illness code, self-reported: urinary frequency / incontinence	361141	359889	1252	both_sexes	UKBB	20002_1202.gwas.imputed_v3.both_sexes.tsv.bgz	0
20002_1220	Non-cancer illness code, self-reported: diabetes	361141	347027	14114	both_sexes	UKBB	20002_1220.gwas.imputed_v3.both_sexes.tsv.bgz	94
20002_1223	Non-cancer illness code, self-reported: type 2 diabetes	361141	358849	2292	both_sexes	UKBB	20002_1223.gwas.imputed_v3.both_sexes.tsv.bgz	2
20002_1225	Non-cancer illness code, self-reported: hyperthyroidism/thyrotoxicosis	361141	358411	2730	both_sexes	UKBB	20002_1225.gwas.imputed_v3.both_sexes.tsv.bgz	44
20002_1226	Non-cancer illness code, self-reported: hypothyroidism/myxoedema	361141	343567	17574	both_sexes	UKBB	20002_1226.gwas.imputed_v3.both_sexes.tsv.bgz	278
20002_1242	Non-cancer illness code, self-reported: eye/eyelid problem	361141	358301	2840	both_sexes	UKBB	20002_1242.gwas.imputed_v3.both_sexes.tsv.bgz	6
20002_1257	Non-cancer illness code, self-reported: trapped nerve/compressed nerve	361141	360068	1073	both_sexes	UKBB	20002_1257.gwas.imputed_v3.both_sexes.tsv.bgz	0
20002_1261	Non-cancer illness code, self-reported: multiple sclerosis	361141	359815	1326	both_sexes	UKBB	20002_1261.gwas.imputed_v3.both_sexes.tsv.bgz	22
20002_1265	Non-cancer illness code, self-reported: migraine	361141	350494	10647	both_sexes	UKBB	20002_1265.gwas.imputed_v3.both_sexes.tsv.bgz	10
20002_1277	Non-cancer illness code, self-reported: glaucoma	361141	357355	3786	both_sexes	UKBB	20002_1277.gwas.imputed_v3.both_sexes.tsv.bgz	14
20002_1278	Non-cancer illness code, self-reported: cataract	361141	356096	5045	both_sexes	UKBB	20002_1278.gwas.imputed_v3.both_sexes.tsv.bgz	0
20002_1281	Non-cancer illness code, self-reported: retinal detachment	361141	359922	1219	both_sexes	UKBB	20002_1281.gwas.imputed_v3.both_sexes.tsv.bgz	0
20002_1286	Non-cancer illness code, self-reported: depression	361141	340493	20648	both_sexes	UKBB	20002_1286.gwas.imputed_v3.both_sexes.tsv.bgz	0
20002_1287	Non-cancer illness code, self-reported: anxiety/panic attacks	361141	356180	4961	both_sexes	UKBB	20002_1287.gwas.imputed_v3.both_sexes.tsv.bgz	0
20002_1291	Non-cancer illness code, self-reported: mania/bipolar disorder/manic depression	361141	360133	1008	both_sexes	UKBB	20002_1291.gwas.imputed_v3.both_sexes.tsv.bgz	4
20002_1294	Non-cancer illness code, self-reported: back problem	361141	354802	6339	both_sexes	UKBB	20002_1294.gwas.imputed_v3.both_sexes.tsv.bgz	0
20002_1297	Non-cancer illness code, self-reported: muscle/soft tissue problem	361141	358279	2862	both_sexes	UKBB	20002_1297.gwas.imputed_v3.both_sexes.tsv.bgz	0
20002_1309	Non-cancer illness code, self-reported: osteoporosis	361141	355405	5736	both_sexes	UKBB	20002_1309.gwas.imputed_v3.both_sexes.tsv.bgz	2
20002_1311	Non-cancer illness code, self-reported: spine arthritis/spondylitis	361141	357987	3154	both_sexes	UKBB	20002_1311.gwas.imputed_v3.both_sexes.tsv.bgz	0
20002_1312	Non-cancer illness code, self-reported: prolapsed disc/slipped disc	361141	355135	6006	both_sexes	UKBB	20002_1312.gwas.imputed_v3.both_sexes.tsv.bgz	0
20002_1313	Non-cancer illness code, self-reported: ankylosing spondylitis	361141	360103	1038	both_sexes	UKBB	20002_1313.gwas.imputed_v3.both_sexes.tsv.bgz	8
20002_1331	Non-cancer illness code, self-reported: pernicious anaemia	361141	360032	1109	both_sexes	UKBB	20002_1331.gwas.imputed_v3.both_sexes.tsv.bgz	12
20002_1387	Non-cancer illness code, self-reported: hayfever/allergic rhinitis	361141	340474	20667	both_sexes	UKBB	20002_1387.gwas.imputed_v3.both_sexes.tsv.bgz	58
20002_1405	Non-cancer illness code, self-reported: other renal/kidney problem	361141	359637	1504	both_sexes	UKBB	20002_1405.gwas.imputed_v3.both_sexes.tsv.bgz	0
20002_1412	Non-cancer illness code, self-reported: bronchitis	361141	358460	2681	both_sexes	UKBB	20002_1412.gwas.imputed_v3.both_sexes.tsv.bgz	0
20002_1413	Non-cancer illness code, self-reported: nasal/sinus disorder	361141	359745	1396	both_sexes	UKBB	20002_1413.gwas.imputed_v3.both_sexes.tsv.bgz	0
20002_1417	Non-cancer illness code, self-reported: nasal polyps	361141	359554	1587	both_sexes	UKBB	20002_1417.gwas.imputed_v3.both_sexes.tsv.bgz	22
20002_1421	Non-cancer illness code, self-reported: meniere's disease	361141	360110	1031	both_sexes	UKBB	20002_1421.gwas.imputed_v3.both_sexes.tsv.bgz	0
20002_1436	Non-cancer illness code, self-reported: headaches (not migraine)	361141	358119	3022	both_sexes	UKBB	20002_1436.gwas.imputed_v3.both_sexes.tsv.bgz	0
20002_1442	Non-cancer illness code, self-reported: helicobacter pylori	361141	360136	1005	both_sexes	UKBB	20002_1442.gwas.imputed_v3.both_sexes.tsv.bgz	0
20002_1452	Non-cancer illness code, self-reported: eczema/dermatitis	361141	351820	9321	both_sexes	UKBB	20002_1452.gwas.imputed_v3.both_sexes.tsv.bgz	50
20002_1453	Non-cancer illness code, self-reported: psoriasis	361141	356949	4192	both_sexes	UKBB	20002_1453.gwas.imputed_v3.both_sexes.tsv.bgz	90
20002_1456	Non-cancer illness code, self-reported: malabsorption/coeliac disease	361141	359554	1587	both_sexes	UKBB	20002_1456.gwas.imputed_v3.both_sexes.tsv.bgz	36
20002_1457	Non-cancer illness code, self-reported: duodenal ulcer	361141	359642	1499	both_sexes	UKBB	20002_1457.gwas.imputed_v3.both_sexes.tsv.bgz	0
20002_1458	Non-cancer illness code, self-reported: diverticular disease/diverticulitis	361141	357017	4124	both_sexes	UKBB	20002_1458.gwas.imputed_v3.both_sexes.tsv.bgz	0
20002_1462	Non-cancer illness code, self-reported: crohns disease	361141	360045	1096	both_sexes	UKBB	20002_1462.gwas.imputed_v3.both_sexes.tsv.bgz	0
20002_1463	Non-cancer illness code, self-reported: ulcerative colitis	361141	359225	1916	both_sexes	UKBB	20002_1463.gwas.imputed_v3.both_sexes.tsv.bgz	20
20002_1464	Non-cancer illness code, self-reported: rheumatoid arthritis	361141	357124	4017	both_sexes	UKBB	20002_1464.gwas.imputed_v3.both_sexes.tsv.bgz	6
20002_1465	Non-cancer illness code, self-reported: osteoarthritis	361141	331095	30046	both_sexes	UKBB	20002_1465.gwas.imputed_v3.both_sexes.tsv.bgz	4
20002_1466	Non-cancer illness code, self-reported: gout	361141	355967	5174	both_sexes	UKBB	20002_1466.gwas.imputed_v3.both_sexes.tsv.bgz	128
20002_1467	Non-cancer illness code, self-reported: other joint disorder	361141	358865	2276	both_sexes	UKBB	20002_1467.gwas.imputed_v3.both_sexes.tsv.bgz	0
20002_1471	Non-cancer illness code, self-reported: atrial fibrillation	361141	358313	2828	both_sexes	UKBB	20002_1471.gwas.imputed_v3.both_sexes.tsv.bgz	28
20002_1473	Non-cancer illness code, self-reported: high cholesterol	361141	317184	43957	both_sexes	UKBB	20002_1473.gwas.imputed_v3.both_sexes.tsv.bgz	280
20002_1474	Non-cancer illness code, self-reported: hiatus hernia	361141	352801	8340	both_sexes	UKBB	20002_1474.gwas.imputed_v3.both_sexes.tsv.bgz	0
20002_1482	Non-cancer illness code, self-reported: chronic fatigue syndrome	361141	359482	1659	both_sexes	UKBB	20002_1482.gwas.imputed_v3.both_sexes.tsv.bgz	0
20002_1494	Non-cancer illness code, self-reported: varicose veins	361141	359842	1299	both_sexes	UKBB	20002_1494.gwas.imputed_v3.both_sexes.tsv.bgz	0
20002_1502	Non-cancer illness code, self-reported: appendicitis	361141	358083	3058	both_sexes	UKBB	20002_1502.gwas.imputed_v3.both_sexes.tsv.bgz	0
20002_1513	Non-cancer illness code, self-reported: inguinal hernia	361141	359644	1497	both_sexes	UKBB	20002_1513.gwas.imputed_v3.both_sexes.tsv.bgz	2
20002_1537	Non-cancer illness code, self-reported: joint pain	361141	359932	1209	both_sexes	UKBB	20002_1537.gwas.imputed_v3.both_sexes.tsv.bgz	0
20002_1568	Non-cancer illness code, self-reported: measles / morbillivirus	361141	359884	1257	both_sexes	UKBB	20002_1568.gwas.imputed_v3.both_sexes.tsv.bgz	0
20002_1598	Non-cancer illness code, self-reported: tonsiltis	361141	358572	2569	both_sexes	UKBB	20002_1598.gwas.imputed_v3.both_sexes.tsv.bgz	12
20002_99999	Non-cancer illness code, self-reported: unclassifiable	361141	346544	14597	both_sexes	UKBB	20002_99999.gwas.imputed_v3.both_sexes.tsv.bgz	0
20003_1140860696	Treatment/medication code: lisinopril	361141	351170	9971	both_sexes	UKBB	20003_1140860696.gwas.imputed_v3.both_sexes.tsv.bgz	0
20003_1140860806	Treatment/medication code: ramipril	361141	344272	16869	both_sexes	UKBB	20003_1140860806.gwas.imputed_v3.both_sexes.tsv.bgz	4
20003_1140860834	Treatment/medication code: glyceryl trinitrate	361141	360030	1111	both_sexes	UKBB	20003_1140860834.gwas.imputed_v3.both_sexes.tsv.bgz	0
20003_1140860954	Treatment/medication code: isosorbide mononitrate	361141	359952	1189	both_sexes	UKBB	20003_1140860954.gwas.imputed_v3.both_sexes.tsv.bgz	0
20003_1140861958	Treatment/medication code: simvastatin	361141	320220	40921	both_sexes	UKBB	20003_1140861958.gwas.imputed_v3.both_sexes.tsv.bgz	152
20003_1140861998	Treatment/medication code: ventolin 100micrograms inhaler	361141	350761	10380	both_sexes	UKBB	20003_1140861998.gwas.imputed_v3.both_sexes.tsv.bgz	190
20003_1140862382	Treatment/medication code: becotide 50 inhaler	361141	358935	2206	both_sexes	UKBB	20003_1140862382.gwas.imputed_v3.both_sexes.tsv.bgz	4
20003_1140862476	Treatment/medication code: beclazone 50 inhaler	361141	360098	1043	both_sexes	UKBB	20003_1140862476.gwas.imputed_v3.both_sexes.tsv.bgz	0
20003_1140864752	Treatment/medication code: lansoprazole	361141	348309	12832	both_sexes	UKBB	20003_1140864752.gwas.imputed_v3.both_sexes.tsv.bgz	10
20003_1140866078	Treatment/medication code: indapamide	361141	359989	1152	both_sexes	UKBB	20003_1140866078.gwas.imputed_v3.both_sexes.tsv.bgz	0
20003_1140866122	Treatment/medication code: bendrofluazide	361141	359219	1922	both_sexes	UKBB	20003_1140866122.gwas.imputed_v3.both_sexes.tsv.bgz	0
20003_1140866738	Treatment/medication code: atenolol	361141	347190	13951	both_sexes	UKBB	20003_1140866738.gwas.imputed_v3.both_sexes.tsv.bgz	4
20003_1140867878	Treatment/medication code: sertraline	361141	359610	1531	both_sexes	UKBB	20003_1140867878.gwas.imputed_v3.both_sexes.tsv.bgz	0
20003_1140867888	Treatment/medication code: paroxetine	361141	359937	1204	both_sexes	UKBB	20003_1140867888.gwas.imputed_v3.both_sexes.tsv.bgz	0
20003_1140868226	Treatment/medication code: aspirin	361141	313060	48081	both_sexes	UKBB	20003_1140868226.gwas.imputed_v3.both_sexes.tsv.bgz	4
20003_1140869848	Treatment/medication code: methotrexate	361141	359223	1918	both_sexes	UKBB	20003_1140869848.gwas.imputed_v3.both_sexes.tsv.bgz	26
20003_1140870390	Treatment/medication code: ferrous sulphate	361141	359381	1760	both_sexes	UKBB	20003_1140870390.gwas.imputed_v3.both_sexes.tsv.bgz	76
20003_1140870422	Treatment/medication code: folic acid product	361141	358117	3024	both_sexes	UKBB	20003_1140870422.gwas.imputed_v3.both_sexes.tsv.bgz	6
20003_1140870570	Treatment/medication code: vitamin b12 preparation	361141	360024	1117	both_sexes	UKBB	20003_1140870570.gwas.imputed_v3.both_sexes.tsv.bgz	0
20003_1140870954	Treatment/medication code: vitamin d product	361141	360127	1014	both_sexes	UKBB	20003_1140870954.gwas.imputed_v3.both_sexes.tsv.bgz	0
20003_1140871024	Treatment/medication code: vitamin b compound tablet	361141	358522	2619	both_sexes	UKBB	20003_1140871024.gwas.imputed_v3.both_sexes.tsv.bgz	0
20003_1140871050	Treatment/medication code: calcichew d3 tablet	361141	357718	3423	both_sexes	UKBB	20003_1140871050.gwas.imputed_v3.both_sexes.tsv.bgz	0
20003_1140871112	Treatment/medication code: vitamin e product	361141	359777	1364	both_sexes	UKBB	20003_1140871112.gwas.imputed_v3.both_sexes.tsv.bgz	0
20003_1140871310	Treatment/medication code: ibuprofen	361141	316136	45005	both_sexes	UKBB	20003_1140871310.gwas.imputed_v3.both_sexes.tsv.bgz	0
20003_1140873548	Treatment/medication code: oxytetracycline	361141	360066	1075	both_sexes	UKBB	20003_1140873548.gwas.imputed_v3.both_sexes.tsv.bgz	6
20003_1140874420	Treatment/medication code: quinine	361141	358712	2429	both_sexes	UKBB	20003_1140874420.gwas.imputed_v3.both_sexes.tsv.bgz	0
20003_1140874744	Treatment/medication code: gliclazide	361141	358134	3007	both_sexes	UKBB	20003_1140874744.gwas.imputed_v3.both_sexes.tsv.bgz	0
20003_1140874852	Treatment/medication code: thyroxine sodium	361141	360129	1012	both_sexes	UKBB	20003_1140874852.gwas.imputed_v3.both_sexes.tsv.bgz	8
20003_1140874930	Treatment/medication code: prednisolone	361141	359038	2103	both_sexes	UKBB	20003_1140874930.gwas.imputed_v3.both_sexes.tsv.bgz	0
20003_1140875408	Treatment/medication code: allopurinol	361141	357033	4108	both_sexes	UKBB	20003_1140875408.gwas.imputed_v3.both_sexes.tsv.bgz	134
20003_1140876076	Treatment/medication code: flixonase 50micrograms aqueous nasal spray	361141	359717	1424	both_sexes	UKBB	20003_1140876076.gwas.imputed_v3.both_sexes.tsv.bgz	0
20003_1140876136	Treatment/medication code: beconase 50micrograms nasal spray	361141	358726	2415	both_sexes	UKBB	20003_1140876136.gwas.imputed_v3.both_sexes.tsv.bgz	0
20003_1140879464	Treatment/medication code: loperamide	361141	359938	1203	both_sexes	UKBB	20003_1140879464.gwas.imputed_v3.both_sexes.tsv.bgz	0
20003_1140879540	Treatment/medication code: fluoxetine	361141	357001	4140	both_sexes	UKBB	20003_1140879540.gwas.imputed_v3.both_sexes.tsv.bgz	0
20003_1140879760	Treatment/medication code: bisoprolol	361141	355837	5304	both_sexes	UKBB	20003_1140879760.gwas.imputed_v3.both_sexes.tsv.bgz	0
20003_1140879778	Treatment/medication code: doxazosin	361141	357098	4043	both_sexes	UKBB	20003_1140879778.gwas.imputed_v3.both_sexes.tsv.bgz	0
20003_1140879802	Treatment/medication code: amlodipine	361141	346553	14588	both_sexes	UKBB	20003_1140879802.gwas.imputed_v3.both_sexes.tsv.bgz	70
20003_1140881856	Treatment/medication code: salbutamol	361141	356836	4305	both_sexes	UKBB	20003_1140881856.gwas.imputed_v3.both_sexes.tsv.bgz	88
20003_1140882694	Treatment/medication code: betnovate cream	361141	359875	1266	both_sexes	UKBB	20003_1140882694.gwas.imputed_v3.both_sexes.tsv.bgz	0
20003_1140883066	Treatment/medication code: insulin product	361141	357596	3545	both_sexes	UKBB	20003_1140883066.gwas.imputed_v3.both_sexes.tsv.bgz	34
20003_1140884444	Treatment/medication code: codeine	361141	359271	1870	both_sexes	UKBB	20003_1140884444.gwas.imputed_v3.both_sexes.tsv.bgz	0
20003_1140884464	Treatment/medication code: dihydrocodeine	361141	359851	1290	both_sexes	UKBB	20003_1140884464.gwas.imputed_v3.both_sexes.tsv.bgz	0
20003_1140884516	Treatment/medication code: thyroxine product	361141	356895	4246	both_sexes	UKBB	20003_1140884516.gwas.imputed_v3.both_sexes.tsv.bgz	14
20003_1140884600	Treatment/medication code: metformin	361141	352173	8968	both_sexes	UKBB	20003_1140884600.gwas.imputed_v3.both_sexes.tsv.bgz	130
20003_1140888266	Treatment/medication code: warfarin	361141	357490	3651	both_sexes	UKBB	20003_1140888266.gwas.imputed_v3.both_sexes.tsv.bgz	12
20003_1140888538	Treatment/medication code: zinc product	361141	358721	2420	both_sexes	UKBB	20003_1140888538.gwas.imputed_v3.both_sexes.tsv.bgz	0
20003_1140888646	Treatment/medication code: felodipine	361141	358051	3090	both_sexes	UKBB	20003_1140888646.gwas.imputed_v3.both_sexes.tsv.bgz	0
20003_1140888648	Treatment/medication code: pravastatin	361141	359415	1726	both_sexes	UKBB	20003_1140888648.gwas.imputed_v3.both_sexes.tsv.bgz	0
20003_1140888688	Treatment/medication code: betahistine	361141	360074	1067	both_sexes	UKBB	20003_1140888688.gwas.imputed_v3.both_sexes.tsv.bgz	0
20003_1140909708	Treatment/medication code: furosemide	361141	358427	2714	both_sexes	UKBB	20003_1140909708.gwas.imputed_v3.both_sexes.tsv.bgz	0
20003_1140909786	Treatment/medication code: beclometasone	361141	357842	3299	both_sexes	UKBB	20003_1140909786.gwas.imputed_v3.both_sexes.tsv.bgz	36
20003_1140910766	Treatment/medication code: nicorandil	361141	359989	1152	both_sexes	UKBB	20003_1140910766.gwas.imputed_v3.both_sexes.tsv.bgz	0
20003_1140911734	Treatment/medication code: ginkgo forte tablet	361141	359068	2073	both_sexes	UKBB	20003_1140911734.gwas.imputed_v3.both_sexes.tsv.bgz	0
20003_1140916282	Treatment/medication code: venlafaxine	361141	359608	1533	both_sexes	UKBB	20003_1140916282.gwas.imputed_v3.both_sexes.tsv.bgz	0
20003_1140916356	Treatment/medication code: losartan	361141	357873	3268	both_sexes	UKBB	20003_1140916356.gwas.imputed_v3.both_sexes.tsv.bgz	0
20003_1140922174	Treatment/medication code: alendronate sodium	361141	357038	4103	both_sexes	UKBB	20003_1140922174.gwas.imputed_v3.both_sexes.tsv.bgz	0
20003_1140923346	Treatment/medication code: co-codamol	361141	352757	8384	both_sexes	UKBB	20003_1140923346.gwas.imputed_v3.both_sexes.tsv.bgz	0
20003_1141146138	Treatment/medication code: lipitor 10mg tablet	361141	358557	2584	both_sexes	UKBB	20003_1141146138.gwas.imputed_v3.both_sexes.tsv.bgz	4
20003_1141146198	Treatment/medication code: xalatan 0.005% eye drops	361141	360107	1034	both_sexes	UKBB	20003_1141146198.gwas.imputed_v3.both_sexes.tsv.bgz	0
20003_1141146234	Treatment/medication code: atorvastatin	361141	350336	10805	both_sexes	UKBB	20003_1141146234.gwas.imputed_v3.both_sexes.tsv.bgz	68
20003_1141152998	Treatment/medication code: irbesartan	361141	358567	2574	both_sexes	UKBB	20003_1141152998.gwas.imputed_v3.both_sexes.tsv.bgz	0
20003_1141156836	Treatment/medication code: candesartan cilexetil	361141	357266	3875	both_sexes	UKBB	20003_1141156836.gwas.imputed_v3.both_sexes.tsv.bgz	0
20003_1141164828	Treatment/medication code: adcal-d3 1.5g/10micrograms chewable tablet	361141	358706	2435	both_sexes	UKBB	20003_1141164828.gwas.imputed_v3.both_sexes.tsv.bgz	0
20003_1141167594	Treatment/medication code: qvar 50 inhaler	361141	359779	1362	both_sexes	UKBB	20003_1141167594.gwas.imputed_v3.both_sexes.tsv.bgz	6
20003_1141168318	Treatment/medication code: clopidogrel	361141	358851	2290	both_sexes	UKBB	20003_1141168318.gwas.imputed_v3.both_sexes.tsv.bgz	80
20003_1141171948	Treatment/medication code: adcal 600mg chewable tablet	361141	360090	1051	both_sexes	UKBB	20003_1141171948.gwas.imputed_v3.both_sexes.tsv.bgz	0
20003_1141174520	Treatment/medication code: symbicort 100/6 turbohaler	361141	358892	2249	both_sexes	UKBB	20003_1141174520.gwas.imputed_v3.both_sexes.tsv.bgz	2
20003_1141176832	Treatment/medication code: seretide 50 evohaler	361141	356872	4269	both_sexes	UKBB	20003_1141176832.gwas.imputed_v3.both_sexes.tsv.bgz	22
20003_1141177526	Treatment/medication code: esomeprazole	361141	359937	1204	both_sexes	UKBB	20003_1141177526.gwas.imputed_v3.both_sexes.tsv.bgz	0
20003_1141188442	Treatment/medication code: glucosamine product	361141	336928	24213	both_sexes	UKBB	20003_1141188442.gwas.imputed_v3.both_sexes.tsv.bgz	0
20003_1141191044	Treatment/medication code: levothyroxine sodium	361141	346452	14689	both_sexes	UKBB	20003_1141191044.gwas.imputed_v3.both_sexes.tsv.bgz	134
20003_1141192410	Treatment/medication code: rosuvastatin	361141	358914	2227	both_sexes	UKBB	20003_1141192410.gwas.imputed_v3.both_sexes.tsv.bgz	2
20003_1141192736	Treatment/medication code: ezetimibe	361141	359009	2132	both_sexes	UKBB	20003_1141192736.gwas.imputed_v3.both_sexes.tsv.bgz	0
20003_1141194794	Treatment/medication code: bendroflumethiazide	361141	340945	20196	both_sexes	UKBB	20003_1141194794.gwas.imputed_v3.both_sexes.tsv.bgz	8
20003_2038460150	Treatment/medication code: paracetamol	361141	294794	66347	both_sexes	UKBB	20003_2038460150.gwas.imputed_v3.both_sexes.tsv.bgz	18
20015_irnt	Sitting height	360066	NA	NA	both_sexes	UKBB	20015_irnt.gwas.imputed_v3.both_sexes.tsv.bgz	3762
20016_irnt	Fluid intelligence score	117131	NA	NA	both_sexes	UKBB	20016_irnt.gwas.imputed_v3.both_sexes.tsv.bgz	102
20018	Prospective memory result	119729	NA	NA	both_sexes	UKBB	20018.gwas.imputed_v3.both_sexes.tsv.bgz	67
20019_irnt	Speech-reception-threshold (SRT) estimate (left)	114811	NA	NA	both_sexes	UKBB	20019_irnt.gwas.imputed_v3.both_sexes.tsv.bgz	0
20022_irnt	Birth weight	205475	NA	NA	both_sexes	UKBB	20022_irnt.gwas.imputed_v3.both_sexes.tsv.bgz	678
20023_irnt	Mean time to correctly identify matches	358695	NA	NA	both_sexes	UKBB	20023_irnt.gwas.imputed_v3.both_sexes.tsv.bgz	194
20074_irnt	Home location at assessment - east co-ordinate (rounded)	357793	NA	NA	both_sexes	UKBB	20074_irnt.gwas.imputed_v3.both_sexes.tsv.bgz	0
20075_irnt	Home location at assessment - north co-ordinate (rounded)	357793	NA	NA	both_sexes	UKBB	20075_irnt.gwas.imputed_v3.both_sexes.tsv.bgz	0
20079_2	Day-of-week questionnaire completion requested: Tuesday	51427	43141	8286	both_sexes	UKBB	20079_2.gwas.imputed_v3.both_sexes.tsv.bgz	0
20084_473	Vitamin and/or mineral supplement use: Glucosamine/chondroitin	51427	43505	7922	both_sexes	UKBB	20084_473.gwas.imputed_v3.both_sexes.tsv.bgz	2
20084_476	Vitamin and/or mineral supplement use: Vitamin B6	51427	50273	1154	both_sexes	UKBB	20084_476.gwas.imputed_v3.both_sexes.tsv.bgz	0
20084_477	Vitamin and/or mineral supplement use: Vitamin B12	51427	50374	1053	both_sexes	UKBB	20084_477.gwas.imputed_v3.both_sexes.tsv.bgz	4
20086_8	Type of special diet followed: Gluten-free	51427	50366	1061	both_sexes	UKBB	20086_8.gwas.imputed_v3.both_sexes.tsv.bgz	28
20089_461	Type of meals eaten: Takeaway meals	51427	49337	2090	both_sexes	UKBB	20089_461.gwas.imputed_v3.both_sexes.tsv.bgz	0
20089_464	Type of meals eaten: Ready meals	51427	47367	4060	both_sexes	UKBB	20089_464.gwas.imputed_v3.both_sexes.tsv.bgz	0
20090_355	Type of fat/oil used in cooking: Vegetable oil	51427	47469	3958	both_sexes	UKBB	20090_355.gwas.imputed_v3.both_sexes.tsv.bgz	0
20090_362	Type of fat/oil used in cooking: Normal fat butter	51427	47757	3670	both_sexes	UKBB	20090_362.gwas.imputed_v3.both_sexes.tsv.bgz	0
20090_367	Type of fat/oil used in cooking: Low fat olive spread for	51427	50278	1149	both_sexes	UKBB	20090_367.gwas.imputed_v3.both_sexes.tsv.bgz	0
20096_1	Size of red wine glass drunk: small (125ml)	51427	48349	3078	both_sexes	UKBB	20096_1.gwas.imputed_v3.both_sexes.tsv.bgz	0
2010	Suffer from 'nerves'	348082	274144	73938	both_sexes	UKBB	2010.gwas.imputed_v3.both_sexes.tsv.bgz	14
20107_1	Illnesses of father: Heart disease	318570	214460	104110	both_sexes	UKBB	20107_1.gwas.imputed_v3.both_sexes.tsv.bgz	28
20107_10	Illnesses of father: Alzheimer's disease/dementia	312666	297644	15022	both_sexes	UKBB	20107_10.gwas.imputed_v3.both_sexes.tsv.bgz	12
20107_100	Illnesses of father: None of the above (group 1)	314797	198061	116736	both_sexes	UKBB	20107_100.gwas.imputed_v3.both_sexes.tsv.bgz	4
20107_101	Illnesses of father: None of the above (group 2)	318545	80871	237674	both_sexes	UKBB	20107_101.gwas.imputed_v3.both_sexes.tsv.bgz	0
20107_13	Illnesses of father: Prostate cancer	312544	288337	24207	both_sexes	UKBB	20107_13.gwas.imputed_v3.both_sexes.tsv.bgz	2
20107_3	Illnesses of father: Lung cancer	314072	284866	29206	both_sexes	UKBB	20107_3.gwas.imputed_v3.both_sexes.tsv.bgz	12
20107_4	Illnesses of father: Bowel cancer	312755	294065	18690	both_sexes	UKBB	20107_4.gwas.imputed_v3.both_sexes.tsv.bgz	0
20107_6	Illnesses of father: Chronic bronchitis/emphysema	314680	278554	36126	both_sexes	UKBB	20107_6.gwas.imputed_v3.both_sexes.tsv.bgz	0
20107_8	Illnesses of father: High blood pressure	315021	243885	71136	both_sexes	UKBB	20107_8.gwas.imputed_v3.both_sexes.tsv.bgz	0
20107_9	Illnesses of father: Diabetes	313294	283284	30010	both_sexes	UKBB	20107_9.gwas.imputed_v3.both_sexes.tsv.bgz	24
20110_1	Illnesses of mother: Heart disease	332966	266623	66343	both_sexes	UKBB	20110_1.gwas.imputed_v3.both_sexes.tsv.bgz	2
20110_10	Illnesses of mother: Alzheimer's disease/dementia	331041	302534	28507	both_sexes	UKBB	20110_10.gwas.imputed_v3.both_sexes.tsv.bgz	22
20110_100	Illnesses of mother: None of the above (group 1)	332611	194320	138291	both_sexes	UKBB	20110_100.gwas.imputed_v3.both_sexes.tsv.bgz	2
20110_101	Illnesses of mother: None of the above (group 2)	334401	76684	257717	both_sexes	UKBB	20110_101.gwas.imputed_v3.both_sexes.tsv.bgz	0
20110_11	Illnesses of mother: Parkinson's disease	330077	324634	5443	both_sexes	UKBB	20110_11.gwas.imputed_v3.both_sexes.tsv.bgz	0
20110_2	Illnesses of mother: Stroke	331973	284488	47485	both_sexes	UKBB	20110_2.gwas.imputed_v3.both_sexes.tsv.bgz	0
20110_3	Illnesses of mother: Lung cancer	330689	317000	13689	both_sexes	UKBB	20110_3.gwas.imputed_v3.both_sexes.tsv.bgz	6
20110_5	Illnesses of mother: Breast cancer	330828	303206	27622	both_sexes	UKBB	20110_5.gwas.imputed_v3.both_sexes.tsv.bgz	2
20110_6	Illnesses of mother: Chronic bronchitis/emphysema	331008	311371	19637	both_sexes	UKBB	20110_6.gwas.imputed_v3.both_sexes.tsv.bgz	6
20110_8	Illnesses of mother: High blood pressure	333048	231360	101688	both_sexes	UKBB	20110_8.gwas.imputed_v3.both_sexes.tsv.bgz	10
20110_9	Illnesses of mother: Diabetes	331142	300370	30772	both_sexes	UKBB	20110_9.gwas.imputed_v3.both_sexes.tsv.bgz	8
20111_1	Illnesses of siblings: Heart disease	280784	252088	28696	both_sexes	UKBB	20111_1.gwas.imputed_v3.both_sexes.tsv.bgz	0
20111_10	Illnesses of siblings: Alzheimer's disease/dementia	279062	277453	1609	both_sexes	UKBB	20111_10.gwas.imputed_v3.both_sexes.tsv.bgz	4
20111_100	Illnesses of siblings: None of the above (group 1)	281979	91010	190969	both_sexes	UKBB	20111_100.gwas.imputed_v3.both_sexes.tsv.bgz	2
20111_13	Illnesses of siblings: Prostate cancer	279171	274653	4518	both_sexes	UKBB	20111_13.gwas.imputed_v3.both_sexes.tsv.bgz	0
20111_2	Illnesses of siblings: Stroke	279577	270380	9197	both_sexes	UKBB	20111_2.gwas.imputed_v3.both_sexes.tsv.bgz	0
20111_5	Illnesses of siblings: Breast cancer	279478	267033	12445	both_sexes	UKBB	20111_5.gwas.imputed_v3.both_sexes.tsv.bgz	0
20111_6	Illnesses of siblings: Chronic bronchitis/emphysema	279496	271563	7933	both_sexes	UKBB	20111_6.gwas.imputed_v3.both_sexes.tsv.bgz	2
20111_8	Illnesses of siblings: High blood pressure	281619	223124	58495	both_sexes	UKBB	20111_8.gwas.imputed_v3.both_sexes.tsv.bgz	8
20111_9	Illnesses of siblings: Diabetes	280211	256765	23446	both_sexes	UKBB	20111_9.gwas.imputed_v3.both_sexes.tsv.bgz	28
20116_0	Smoking status: Never	359706	164638	195068	both_sexes	UKBB	20116_0.gwas.imputed_v3.both_sexes.tsv.bgz	206
20116_1	Smoking status: Previous	359706	232156	127550	both_sexes	UKBB	20116_1.gwas.imputed_v3.both_sexes.tsv.bgz	22
20116_2	Smoking status: Current	359706	322618	37088	both_sexes	UKBB	20116_2.gwas.imputed_v3.both_sexes.tsv.bgz	38
20117_0	Alcohol drinker status: Never	360726	349483	11243	both_sexes	UKBB	20117_0.gwas.imputed_v3.both_sexes.tsv.bgz	0
20117_2	Alcohol drinker status: Current	360726	23807	336919	both_sexes	UKBB	20117_2.gwas.imputed_v3.both_sexes.tsv.bgz	0
20118_11	Home area population density - urban or rural: Scotland - Large Urban Area	357712	336781	20931	both_sexes	UKBB	20118_11.gwas.imputed_v3.both_sexes.tsv.bgz	0
20118_12	Home area population density - urban or rural: Scotland - Other Urban Area	357712	353714	3998	both_sexes	UKBB	20118_12.gwas.imputed_v3.both_sexes.tsv.bgz	0
20118_16	Home area population density - urban or rural: Scotland - Accessible Rural	357712	356482	1230	both_sexes	UKBB	20118_16.gwas.imputed_v3.both_sexes.tsv.bgz	0
20126_0	Bipolar and major depression status: No Bipolar or Depression	86895	24070	62825	both_sexes	UKBB	20126_0.gwas.imputed_v3.both_sexes.tsv.bgz	0
20127_irnt	Neuroticism score	293006	NA	NA	both_sexes	UKBB	20127_irnt.gwas.imputed_v3.both_sexes.tsv.bgz	438
20128	Number of fluid intelligence questions attempted within time limit	117131	NA	NA	both_sexes	UKBB	20128.gwas.imputed_v3.both_sexes.tsv.bgz	0
20150_irnt	Forced expiratory volume in 1-second (FEV1), Best measure	272338	NA	NA	both_sexes	UKBB	20150_irnt.gwas.imputed_v3.both_sexes.tsv.bgz	718
20151_irnt	Forced vital capacity (FVC), Best measure	272338	NA	NA	both_sexes	UKBB	20151_irnt.gwas.imputed_v3.both_sexes.tsv.bgz	1350
20152	Reproduciblity of spirometry measurement using ERS/ATS criteria	272338	59808	212530	both_sexes	UKBB	20152.gwas.imputed_v3.both_sexes.tsv.bgz	0
20153_irnt	Forced expiratory volume in 1-second (FEV1), predicted	117241	NA	NA	both_sexes	UKBB	20153_irnt.gwas.imputed_v3.both_sexes.tsv.bgz	1402
20154_irnt	Forced expiratory volume in 1-second (FEV1), predicted percentage	117241	NA	NA	both_sexes	UKBB	20154_irnt.gwas.imputed_v3.both_sexes.tsv.bgz	370
20160	Ever smoked	359751	141560	218191	both_sexes	UKBB	20160.gwas.imputed_v3.both_sexes.tsv.bgz	84
2020	Loneliness, isolation	355583	292075	63508	both_sexes	UKBB	2020.gwas.imputed_v3.both_sexes.tsv.bgz	7
2030	Guilty feelings	351907	251779	100128	both_sexes	UKBB	2030.gwas.imputed_v3.both_sexes.tsv.bgz	20
2040	Risk taking	348549	258049	90500	both_sexes	UKBB	2040.gwas.imputed_v3.both_sexes.tsv.bgz	28
20403	Amount of alcohol drunk on a typical drinking day	108256	NA	NA	both_sexes	UKBB	20403.gwas.imputed_v3.both_sexes.tsv.bgz	1
20405_0	Ever had known person concerned about, or recommend reduction of, alcohol consumption: No	117880	10406	107474	both_sexes	UKBB	20405_0.gwas.imputed_v3.both_sexes.tsv.bgz	2
20405_1	Ever had known person concerned about, or recommend reduction of, alcohol consumption: Yes, but not in the last year	117880	112398	5482	both_sexes	UKBB	20405_1.gwas.imputed_v3.both_sexes.tsv.bgz	0
20405_2	Ever had known person concerned about, or recommend reduction of, alcohol consumption: Yes, during the last year	117880	112956	4924	both_sexes	UKBB	20405_2.gwas.imputed_v3.both_sexes.tsv.bgz	0
20408	Frequency of memory loss due to drinking alcohol in last year	65029	NA	NA	both_sexes	UKBB	20408.gwas.imputed_v3.both_sexes.tsv.bgz	0
20409	Frequency of feeling guilt or remorse after drinking alcohol in last year	65009	NA	NA	both_sexes	UKBB	20409.gwas.imputed_v3.both_sexes.tsv.bgz	0
20411_0	Ever been injured or injured someone else through drinking alcohol: No	118002	5093	112909	both_sexes	UKBB	20411_0.gwas.imputed_v3.both_sexes.tsv.bgz	0
20411_1	Ever been injured or injured someone else through drinking alcohol: Yes, but not in the last year	118002	113461	4541	both_sexes	UKBB	20411_1.gwas.imputed_v3.both_sexes.tsv.bgz	0
20412	Frequency of needing morning drink of alcohol after heavy drinking session in last year	65099	NA	NA	both_sexes	UKBB	20412.gwas.imputed_v3.both_sexes.tsv.bgz	0
20413	Frequency of inability to cease drinking in last year	64973	NA	NA	both_sexes	UKBB	20413.gwas.imputed_v3.both_sexes.tsv.bgz	0
20414	Frequency of drinking alcohol	117914	NA	NA	both_sexes	UKBB	20414.gwas.imputed_v3.both_sexes.tsv.bgz	2
20416	Frequency of consuming six or more units of alcohol	108485	NA	NA	both_sexes	UKBB	20416.gwas.imputed_v3.both_sexes.tsv.bgz	3
20417	Tense, sore, or aching muscles during worst period of anxiety	33301	20305	12996	both_sexes	UKBB	20417.gwas.imputed_v3.both_sexes.tsv.bgz	0
20420_irnt	Longest period spent worried or anxious	24738	NA	NA	both_sexes	UKBB	20420_irnt.gwas.imputed_v3.both_sexes.tsv.bgz	0
20422	More irritable than usual during worst period of anxiety	33425	9411	24014	both_sexes	UKBB	20422.gwas.imputed_v3.both_sexes.tsv.bgz	0
20425	Ever worried more than most people would in similar situation	98990	73367	25623	both_sexes	UKBB	20425.gwas.imputed_v3.both_sexes.tsv.bgz	0
20441	Ever had prolonged loss of interest in normal activities	117727	71397	46330	both_sexes	UKBB	20441.gwas.imputed_v3.both_sexes.tsv.bgz	0
20453	Ever taken cannabis	117911	NA	NA	both_sexes	UKBB	20453.gwas.imputed_v3.both_sexes.tsv.bgz	1
20459	General happiness with own health	117753	NA	NA	both_sexes	UKBB	20459.gwas.imputed_v3.both_sexes.tsv.bgz	7
20460	Belief that own life is meaningful	115352	NA	NA	both_sexes	UKBB	20460.gwas.imputed_v3.both_sexes.tsv.bgz	0
20479	Ever thought that life not worth living	117291	NA	NA	both_sexes	UKBB	20479.gwas.imputed_v3.both_sexes.tsv.bgz	0
20480	Ever self-harmed	117733	112634	5099	both_sexes	UKBB	20480.gwas.imputed_v3.both_sexes.tsv.bgz	0
20488	Physically abused by family as a child	117838	NA	NA	both_sexes	UKBB	20488.gwas.imputed_v3.both_sexes.tsv.bgz	0
20495	Avoided activities or situations because of previous stressful experience in past month	117868	NA	NA	both_sexes	UKBB	20495.gwas.imputed_v3.both_sexes.tsv.bgz	0
20497	Repeated disturbing thoughts of stressful experience in past month	117900	NA	NA	both_sexes	UKBB	20497.gwas.imputed_v3.both_sexes.tsv.bgz	0
20498	Felt very upset when reminded of stressful experience in past month	117893	NA	NA	both_sexes	UKBB	20498.gwas.imputed_v3.both_sexes.tsv.bgz	0
20499	Ever sought or received professional help for mental distress	117677	71657	46020	both_sexes	UKBB	20499.gwas.imputed_v3.both_sexes.tsv.bgz	22
2050	Frequency of depressed mood in last 2 weeks	345957	NA	NA	both_sexes	UKBB	2050.gwas.imputed_v3.both_sexes.tsv.bgz	1
20500	Ever suffered mental distress preventing usual activities	116527	77846	38681	both_sexes	UKBB	20500.gwas.imputed_v3.both_sexes.tsv.bgz	21
20501	Ever had period of mania / excitability	115338	110522	4816	both_sexes	UKBB	20501.gwas.imputed_v3.both_sexes.tsv.bgz	0
20502	Ever had period extreme irritability	114422	84675	29747	both_sexes	UKBB	20502.gwas.imputed_v3.both_sexes.tsv.bgz	0
20509	Recent inability to stop or control worrying	117583	NA	NA	both_sexes	UKBB	20509.gwas.imputed_v3.both_sexes.tsv.bgz	0
20515	Recent trouble relaxing	117706	NA	NA	both_sexes	UKBB	20515.gwas.imputed_v3.both_sexes.tsv.bgz	0
20517	Trouble falling or staying asleep, or sleeping too much	117822	NA	NA	both_sexes	UKBB	20517.gwas.imputed_v3.both_sexes.tsv.bgz	0
20519	Recent feelings of tiredness or low energy	117828	NA	NA	both_sexes	UKBB	20519.gwas.imputed_v3.both_sexes.tsv.bgz	14
20520	Recent worrying too much about different things	117567	NA	NA	both_sexes	UKBB	20520.gwas.imputed_v3.both_sexes.tsv.bgz	0
20521	Belittlement by partner or ex-partner as an adult	117741	NA	NA	both_sexes	UKBB	20521.gwas.imputed_v3.both_sexes.tsv.bgz	0
20523	Physical violence by partner or ex-partner as an adult	117746	NA	NA	both_sexes	UKBB	20523.gwas.imputed_v3.both_sexes.tsv.bgz	0
20525	Able to pay rent/mortgage as an adult	116296	NA	NA	both_sexes	UKBB	20525.gwas.imputed_v3.both_sexes.tsv.bgz	0
20526	Been in serious accident believed to be life-threatening	117922	106597	11325	both_sexes	UKBB	20526.gwas.imputed_v3.both_sexes.tsv.bgz	0
20527	Been involved in combat or exposed to war-zone	117954	113944	4010	both_sexes	UKBB	20527.gwas.imputed_v3.both_sexes.tsv.bgz	0
20530	Witnessed sudden violent death	117862	101903	15959	both_sexes	UKBB	20530.gwas.imputed_v3.both_sexes.tsv.bgz	0
20531	Victim of sexual assault	116671	99441	17230	both_sexes	UKBB	20531.gwas.imputed_v3.both_sexes.tsv.bgz	0
20533	Trouble falling asleep	45540	11049	34491	both_sexes	UKBB	20533.gwas.imputed_v3.both_sexes.tsv.bgz	0
20534	Sleeping too much	45540	36186	9354	both_sexes	UKBB	20534.gwas.imputed_v3.both_sexes.tsv.bgz	0
20536_1	Weight change during worst episode of depression: Gained weight	56571	46863	9708	both_sexes	UKBB	20536_1.gwas.imputed_v3.both_sexes.tsv.bgz	0
20537	Frequency of difficulty controlling worry during worst period of anxiety	36157	NA	NA	both_sexes	UKBB	20537.gwas.imputed_v3.both_sexes.tsv.bgz	0
20541	Difficulty stopping worrying during worst period of anxiety	35523	2057	33466	both_sexes	UKBB	20541.gwas.imputed_v3.both_sexes.tsv.bgz	0
20544_11	Mental health problems ever diagnosed by a professional: Depression	117782	92695	25087	both_sexes	UKBB	20544_11.gwas.imputed_v3.both_sexes.tsv.bgz	62
20544_15	Mental health problems ever diagnosed by a professional: Anxiety, nerves or generalized anxiety disorder	117751	101021	16730	both_sexes	UKBB	20544_15.gwas.imputed_v3.both_sexes.tsv.bgz	0
20544_5	Mental health problems ever diagnosed by a professional: Any other phobia (eg disabling fear of heights or spiders)	117710	116119	1591	both_sexes	UKBB	20544_5.gwas.imputed_v3.both_sexes.tsv.bgz	0
20544_6	Mental health problems ever diagnosed by a professional: Panic attacks	117722	111204	6518	both_sexes	UKBB	20544_6.gwas.imputed_v3.both_sexes.tsv.bgz	6
20546_1	Substances taken for depression: Unprescribed medication (more than once)	117763	113652	4111	both_sexes	UKBB	20546_1.gwas.imputed_v3.both_sexes.tsv.bgz	0
20547_1	Activities undertaken to treat depression: Talking therapies, such as psychotherapy, counselling, group therapy or CBT	117763	91803	25960	both_sexes	UKBB	20547_1.gwas.imputed_v3.both_sexes.tsv.bgz	42
20547_3	Activities undertaken to treat depression: Other therapeutic activities such as mindfulness, yoga or art classes	117763	108564	9199	both_sexes	UKBB	20547_3.gwas.imputed_v3.both_sexes.tsv.bgz	0
20548_2	Manifestations of mania or irritability: I was more restless than usual	114422	101546	12876	both_sexes	UKBB	20548_2.gwas.imputed_v3.both_sexes.tsv.bgz	0
20548_5	Manifestations of mania or irritability: I needed less sleep than usual	114422	110645	3777	both_sexes	UKBB	20548_5.gwas.imputed_v3.both_sexes.tsv.bgz	0
20549_1	Substances taken for anxiety: Unprescribed medication (more than once)	98990	96426	2564	both_sexes	UKBB	20549_1.gwas.imputed_v3.both_sexes.tsv.bgz	0
20550_1	Activities undertaken to treat anxiety: Talking therapies, such as psychotherapy, counselling, group therapy or CBT	98990	86132	12858	both_sexes	UKBB	20550_1.gwas.imputed_v3.both_sexes.tsv.bgz	40
20552_2	Behavioural and miscellaneous addictions: A behaviour	116746	115530	1216	both_sexes	UKBB	20552_2.gwas.imputed_v3.both_sexes.tsv.bgz	0
20553_5	Methods of self-harm used: Self-injury such as self-cutting, scratching or hitting, etc.	117733	115195	2538	both_sexes	UKBB	20553_5.gwas.imputed_v3.both_sexes.tsv.bgz	0
20554_5	Actions taken following self-harm: See own GP	117733	116484	1249	both_sexes	UKBB	20554_5.gwas.imputed_v3.both_sexes.tsv.bgz	0
20554_6	Actions taken following self-harm: Receive help from friends / family / neighbours	117733	116280	1453	both_sexes	UKBB	20554_6.gwas.imputed_v3.both_sexes.tsv.bgz	0
2060	Frequency of unenthusiasm / disinterest in last 2 weeks	349631	NA	NA	both_sexes	UKBB	2060.gwas.imputed_v3.both_sexes.tsv.bgz	0
2070	Frequency of tenseness / restlessness in last 2 weeks	347965	NA	NA	both_sexes	UKBB	2070.gwas.imputed_v3.both_sexes.tsv.bgz	3
2080	Frequency of tiredness / lethargy in last 2 weeks	350580	NA	NA	both_sexes	UKBB	2080.gwas.imputed_v3.both_sexes.tsv.bgz	25
2090	Seen doctor (GP) for nerves, anxiety, tension or depression	358693	235165	123528	both_sexes	UKBB	2090.gwas.imputed_v3.both_sexes.tsv.bgz	109
2100	Seen a psychiatrist for nerves, anxiety, tension or depression	359535	318302	41233	both_sexes	UKBB	2100.gwas.imputed_v3.both_sexes.tsv.bgz	74
21001_irnt	Body mass index (BMI)	359983	NA	NA	both_sexes	UKBB	21001_irnt.gwas.imputed_v3.both_sexes.tsv.bgz	1844
21002_irnt	Weight	360116	NA	NA	both_sexes	UKBB	21002_irnt.gwas.imputed_v3.both_sexes.tsv.bgz	2434
21002_raw	Weight	360116	NA	NA	both_sexes	UKBB	21002_raw.gwas.imputed_v3.both_sexes.tsv.bgz	0
21021_irnt	Pulse wave Arterial Stiffness index	118469	NA	NA	both_sexes	UKBB	21021_irnt.gwas.imputed_v3.both_sexes.tsv.bgz	0
2110	Able to confide	350618	NA	NA	both_sexes	UKBB	2110.gwas.imputed_v3.both_sexes.tsv.bgz	2
2139_irnt	Age first had sexual intercourse	317694	NA	NA	both_sexes	UKBB	2139_irnt.gwas.imputed_v3.both_sexes.tsv.bgz	310
2149	Lifetime number of sexual partners	296609	NA	NA	both_sexes	UKBB	2149.gwas.imputed_v3.both_sexes.tsv.bgz	75
2159	Ever had same-sex intercourse	326849	315740	11109	both_sexes	UKBB	2159.gwas.imputed_v3.both_sexes.tsv.bgz	0
2178	Overall health rating	359681	NA	NA	both_sexes	UKBB	2178.gwas.imputed_v3.both_sexes.tsv.bgz	142
2188	Long-standing illness, disability or infirmity	352798	238000	114798	both_sexes	UKBB	2188.gwas.imputed_v3.both_sexes.tsv.bgz	24
2207	Wears glasses or contact lenses	360677	38909	321768	both_sexes	UKBB	2207.gwas.imputed_v3.both_sexes.tsv.bgz	0
22126	Doctor diagnosed hayfever or allergic rhinitis	91787	70883	20904	both_sexes	UKBB	22126.gwas.imputed_v3.both_sexes.tsv.bgz	21
22127	Doctor diagnosed asthma	91787	80070	11717	both_sexes	UKBB	22127.gwas.imputed_v3.both_sexes.tsv.bgz	100
22129	Doctor diagnosed chronic bronchitis	91787	90739	1048	both_sexes	UKBB	22129.gwas.imputed_v3.both_sexes.tsv.bgz	0
22146_irnt	Age hayfever or allergic rhinitis diagnosed by doctor	20904	NA	NA	both_sexes	UKBB	22146_irnt.gwas.imputed_v3.both_sexes.tsv.bgz	16
22147_irnt	Age asthma diagnosed by doctor	11717	NA	NA	both_sexes	UKBB	22147_irnt.gwas.imputed_v3.both_sexes.tsv.bgz	0
22167	Recent medication for asthma	11717	4480	7237	both_sexes	UKBB	22167.gwas.imputed_v3.both_sexes.tsv.bgz	3
2217_irnt	Age started wearing glasses or contact lenses	310992	NA	NA	both_sexes	UKBB	2217_irnt.gwas.imputed_v3.both_sexes.tsv.bgz	578
2227	Other eye problems	360134	308414	51720	both_sexes	UKBB	2227.gwas.imputed_v3.both_sexes.tsv.bgz	0
2247_0	Hearing difficulty/problems: No	346635	90797	255838	both_sexes	UKBB	2247_0.gwas.imputed_v3.both_sexes.tsv.bgz	76
2247_1	Hearing difficulty/problems: Yes	346635	255925	90710	both_sexes	UKBB	2247_1.gwas.imputed_v3.both_sexes.tsv.bgz	78
22501_irnt	Year ended full time education	91777	NA	NA	both_sexes	UKBB	22501_irnt.gwas.imputed_v3.both_sexes.tsv.bgz	38
22502	Cough on most days	91787	79194	12593	both_sexes	UKBB	22502.gwas.imputed_v3.both_sexes.tsv.bgz	0
22504	Bring up phlegm/sputum/mucus on most days	91787	83979	7808	both_sexes	UKBB	22504.gwas.imputed_v3.both_sexes.tsv.bgz	46
22506_111	Tobacco smoking: Smokes on most or all days	91353	89229	2124	both_sexes	UKBB	22506_111.gwas.imputed_v3.both_sexes.tsv.bgz	0
22506_112	Tobacco smoking: Occasionally	91353	89979	1374	both_sexes	UKBB	22506_112.gwas.imputed_v3.both_sexes.tsv.bgz	0
22506_113	Tobacco smoking: Ex-smoker	91353	58018	33335	both_sexes	UKBB	22506_113.gwas.imputed_v3.both_sexes.tsv.bgz	0
22506_114	Tobacco smoking: Never smoked	91353	36833	54520	both_sexes	UKBB	22506_114.gwas.imputed_v3.both_sexes.tsv.bgz	2
2257	Hearing difficulty/problems with background noise	353983	219842	134141	both_sexes	UKBB	2257.gwas.imputed_v3.both_sexes.tsv.bgz	93
22601_11123211	Job coding: director or chief executive of private organisation/company, company chairman or president, general manager	89866	87155	2711	both_sexes	UKBB	22601_11123211.gwas.imputed_v3.both_sexes.tsv.bgz	0
22601_11222591	Job coding: manager in construction, clerk of works, site manager, contracts manager, highways manager	89866	88837	1029	both_sexes	UKBB	22601_11222591.gwas.imputed_v3.both_sexes.tsv.bgz	0
22601_11323222	Job coding: sales or marketing manager/director, export/import manager, business development manager, advertising/commercial manager	89866	87683	2183	both_sexes	UKBB	22601_11323222.gwas.imputed_v3.both_sexes.tsv.bgz	0
22601_11363057	Job coding: ict or it manager, systems/data processing manager, telecom manager	89866	88270	1596	both_sexes	UKBB	22601_11363057.gwas.imputed_v3.both_sexes.tsv.bgz	0
22601_11523251	Job coding: office manager, account/payrolls manager, administration manager, litigation/solicitor's office manager	89866	88766	1100	both_sexes	UKBB	22601_11523251.gwas.imputed_v3.both_sexes.tsv.bgz	0
22601_11633322	Job coding: retail or wholesale shop manager, showroom manager	89866	88200	1666	both_sexes	UKBB	22601_11633322.gwas.imputed_v3.both_sexes.tsv.bgz	4
22601_12343321	Job coding: shopkeeper, shop owner, newsagent, wholesale/retail dealer	89866	88445	1421	both_sexes	UKBB	22601_12343321.gwas.imputed_v3.both_sexes.tsv.bgz	0
22601_21113020	Job coding: chemist (analytic, developmental, industrial, research)	89866	88805	1061	both_sexes	UKBB	22601_21113020.gwas.imputed_v3.both_sexes.tsv.bgz	0
22601_21313058	Job coding: it strategy or planning professional, computer consultant, software consultant	89866	88049	1817	both_sexes	UKBB	22601_21313058.gwas.imputed_v3.both_sexes.tsv.bgz	0
22601_23113399	Job coding: higher education teaching professional, university lecturer/professor (including college/university head/vice chancellor)	89866	87235	2631	both_sexes	UKBB	22601_23113399.gwas.imputed_v3.both_sexes.tsv.bgz	0
22601_23123400	Job coding: further education teaching professional, college lecturer/professor	89866	87399	2467	both_sexes	UKBB	22601_23123400.gwas.imputed_v3.both_sexes.tsv.bgz	0
22601_23193405	Job coding: other teaching professional including private tutor, tefl (teaching english as a foreign language) teacher; tutor at adult education centre, etc.	89866	88477	1389	both_sexes	UKBB	22601_23193405.gwas.imputed_v3.both_sexes.tsv.bgz	0
22601_24113277	Job coding: solicitor, lawyer, barrister, judge, coroner, articled clerk, attorney, advocate, stipendiary magistrate, fiscal/crown prosecutor, sheriff (scottish courts), legal services recorder	89866	88795	1071	both_sexes	UKBB	22601_24113277.gwas.imputed_v3.both_sexes.tsv.bgz	0
22601_24213281	Job coding: chartered/certified accountant, auditor, company accountant, articled/audit clerk, official receiver	89866	87947	1919	both_sexes	UKBB	22601_24213281.gwas.imputed_v3.both_sexes.tsv.bgz	0
22601_24423108	Job coding: social worker, child care/protection officer, adoption officer, mental health officer, almoner, family case worker	89866	88378	1488	both_sexes	UKBB	22601_24423108.gwas.imputed_v3.both_sexes.tsv.bgz	26
22601_31193034	Job coding: other science technician, materials technician, technical assistant, technical officer	89866	88464	1402	both_sexes	UKBB	22601_31193034.gwas.imputed_v3.both_sexes.tsv.bgz	0
22601_31313060	Job coding: it operations technician, computer operator or technician, database manager, network or web technician, web master, systems administrator or officer	89866	88795	1071	both_sexes	UKBB	22601_31313060.gwas.imputed_v3.both_sexes.tsv.bgz	0
22601_32313110	Job coding: community worker, day centre officer, youth leader, youth worker, parish worker, bail support officer	89866	88827	1039	both_sexes	UKBB	22601_32313110.gwas.imputed_v3.both_sexes.tsv.bgz	0
22601_33123442	Job coding: police officer (sergeant or below)	89866	88724	1142	both_sexes	UKBB	22601_33123442.gwas.imputed_v3.both_sexes.tsv.bgz	0
22601_35393271	Job coding: management information officer, conference/events co-ordinator/organiser, exhibition officer, work study engineer/officer/analyst, contract adviser/agent, election agent, business system analyst	89866	88009	1857	both_sexes	UKBB	22601_35393271.gwas.imputed_v3.both_sexes.tsv.bgz	0
22601_35423237	Job coding: sales or marketing representative, manufacturer's agent or representative or salesman/woman	89866	88745	1121	both_sexes	UKBB	22601_35423237.gwas.imputed_v3.both_sexes.tsv.bgz	0
22601_41223241	Job coding: accounts and wages clerk/assistant/supervisor, bookkeeper, cost or ledger clerk, audit assistant, budget officer, student loans officer, paymaster	89866	87944	1922	both_sexes	UKBB	22601_41223241.gwas.imputed_v3.both_sexes.tsv.bgz	0
22601_41233254	Job coding: counter clerk, bank clerk, cashier, post office clerk	89866	86815	3051	both_sexes	UKBB	22601_41233254.gwas.imputed_v3.both_sexes.tsv.bgz	0
22601_41323255	Job coding: pensions and insurance clerk/administrator, claims handler	89866	88617	1249	both_sexes	UKBB	22601_41323255.gwas.imputed_v3.both_sexes.tsv.bgz	0
22601_42163303	Job coding: receptionist, doctor's/dental receptionist	89866	88778	1088	both_sexes	UKBB	22601_42163303.gwas.imputed_v3.both_sexes.tsv.bgz	0
22601_72123243	Job coding: customer care adviser/officer/assistant, store guide, customer relations officer/representative	89866	88653	1213	both_sexes	UKBB	22601_72123243.gwas.imputed_v3.both_sexes.tsv.bgz	0
22601_92193312	Job coding: other general office clerical tasks including: office junior, office worker, photocopy/print room operator, office machinist	89866	86596	3270	both_sexes	UKBB	22601_92193312.gwas.imputed_v3.both_sexes.tsv.bgz	0
22607_0	Workplace very cold: Rarely/never	90696	13643	77053	both_sexes	UKBB	22607_0.gwas.imputed_v3.both_sexes.tsv.bgz	0
22607_1	Workplace very cold: Sometimes	90500	47677	42823	both_sexes	UKBB	22607_1.gwas.imputed_v3.both_sexes.tsv.bgz	0
22608_0	Workplace very hot: Rarely/never	90644	21939	68705	both_sexes	UKBB	22608_0.gwas.imputed_v3.both_sexes.tsv.bgz	0
22612_2	Worked with materials containing asbestos: Often	76457	75195	1262	both_sexes	UKBB	22612_2.gwas.imputed_v3.both_sexes.tsv.bgz	0
22615_2	Workplace had a lot of diesel exhaust: Often	89104	85621	3483	both_sexes	UKBB	22615_2.gwas.imputed_v3.both_sexes.tsv.bgz	0
22616_0	Breathing problems during period of job: No	91149	1558	89591	both_sexes	UKBB	22616_0.gwas.imputed_v3.both_sexes.tsv.bgz	0
22616_1	Breathing problems during period of job: Yes	91149	84452	6697	both_sexes	UKBB	22616_1.gwas.imputed_v3.both_sexes.tsv.bgz	0
22617_1112	Job SOC coding: Directors and chief executives of major organisations	91149	88360	2789	both_sexes	UKBB	22617_1112.gwas.imputed_v3.both_sexes.tsv.bgz	0
22617_1122	Job SOC coding: Managers in construction	91149	90089	1060	both_sexes	UKBB	22617_1122.gwas.imputed_v3.both_sexes.tsv.bgz	0
22617_1132	Job SOC coding: Marketing and sales managers	91149	88900	2249	both_sexes	UKBB	22617_1132.gwas.imputed_v3.both_sexes.tsv.bgz	0
22617_1136	Job SOC coding: Information and communication technology managers	91149	89515	1634	both_sexes	UKBB	22617_1136.gwas.imputed_v3.both_sexes.tsv.bgz	0
22617_1163	Job SOC coding: Retail and wholesale managers	91149	89396	1753	both_sexes	UKBB	22617_1163.gwas.imputed_v3.both_sexes.tsv.bgz	4
22617_1234	Job SOC coding: Shopkeepers and wholesale/retail dealers	91149	89682	1467	both_sexes	UKBB	22617_1234.gwas.imputed_v3.both_sexes.tsv.bgz	0
22617_2122	Job SOC coding: Mechanical engineers	91149	89554	1595	both_sexes	UKBB	22617_2122.gwas.imputed_v3.both_sexes.tsv.bgz	0
22617_2311	Job SOC coding: Higher education teaching professionals	91149	88049	3100	both_sexes	UKBB	22617_2311.gwas.imputed_v3.both_sexes.tsv.bgz	0
22617_2312	Job SOC coding: Further education teaching professionals	91149	88629	2520	both_sexes	UKBB	22617_2312.gwas.imputed_v3.both_sexes.tsv.bgz	0
22617_2319	Job SOC coding: Teaching professionals n.e.c.	91149	89522	1627	both_sexes	UKBB	22617_2319.gwas.imputed_v3.both_sexes.tsv.bgz	0
22617_2411	Job SOC coding: Solicitors and lawyers, judges and coroners	91149	90061	1088	both_sexes	UKBB	22617_2411.gwas.imputed_v3.both_sexes.tsv.bgz	0
22617_2421	Job SOC coding: Chartered and certified accountants	91149	89177	1972	both_sexes	UKBB	22617_2421.gwas.imputed_v3.both_sexes.tsv.bgz	0
22617_2442	Job SOC coding: Social workers	91149	89640	1509	both_sexes	UKBB	22617_2442.gwas.imputed_v3.both_sexes.tsv.bgz	26
22617_3113	Job SOC coding: Engineering technicians	91149	90106	1043	both_sexes	UKBB	22617_3113.gwas.imputed_v3.both_sexes.tsv.bgz	0
22617_3119	Job SOC coding: Science and engineering technicians n.e.c.	91149	89131	2018	both_sexes	UKBB	22617_3119.gwas.imputed_v3.both_sexes.tsv.bgz	0
22617_3131	Job SOC coding: IT operations technicians	91149	90047	1102	both_sexes	UKBB	22617_3131.gwas.imputed_v3.both_sexes.tsv.bgz	0
22617_3231	Job SOC coding: Youth and community workers	91149	90087	1062	both_sexes	UKBB	22617_3231.gwas.imputed_v3.both_sexes.tsv.bgz	0
22617_3312	Job SOC coding: Police officers (sergeant and below)	91149	89981	1168	both_sexes	UKBB	22617_3312.gwas.imputed_v3.both_sexes.tsv.bgz	0
22617_3542	Job SOC coding: Sales representatives	91149	90007	1142	both_sexes	UKBB	22617_3542.gwas.imputed_v3.both_sexes.tsv.bgz	0
22617_3561	Job SOC coding: Public service associate professionals	91149	87868	3281	both_sexes	UKBB	22617_3561.gwas.imputed_v3.both_sexes.tsv.bgz	0
22617_3562	Job SOC coding: Personnel and industrial relations officers	91149	89703	1446	both_sexes	UKBB	22617_3562.gwas.imputed_v3.both_sexes.tsv.bgz	0
22617_4131	Job SOC coding: Filing and other records assistants/clerks	91149	89612	1537	both_sexes	UKBB	22617_4131.gwas.imputed_v3.both_sexes.tsv.bgz	0
22617_4132	Job SOC coding: Pensions and insurance clerks	91149	89879	1270	both_sexes	UKBB	22617_4132.gwas.imputed_v3.both_sexes.tsv.bgz	0
22617_4211	Job SOC coding: Medical secretaries	91149	90109	1040	both_sexes	UKBB	22617_4211.gwas.imputed_v3.both_sexes.tsv.bgz	0
22617_4213	Job SOC coding: School secretaries	91149	89907	1242	both_sexes	UKBB	22617_4213.gwas.imputed_v3.both_sexes.tsv.bgz	0
22617_4215	Job SOC coding: Personal assistants and other secretaries	91149	85731	5418	both_sexes	UKBB	22617_4215.gwas.imputed_v3.both_sexes.tsv.bgz	0
22617_4216	Job SOC coding: Receptionists	91149	89742	1407	both_sexes	UKBB	22617_4216.gwas.imputed_v3.both_sexes.tsv.bgz	0
22617_5223	Job SOC coding: Metal working production and maintenance fitters	91149	89941	1208	both_sexes	UKBB	22617_5223.gwas.imputed_v3.both_sexes.tsv.bgz	0
22617_5241	Job SOC coding: Electricians, electrical fitters	91149	90088	1061	both_sexes	UKBB	22617_5241.gwas.imputed_v3.both_sexes.tsv.bgz	0
22617_7212	Job SOC coding: Customer care occupations	91149	89466	1683	both_sexes	UKBB	22617_7212.gwas.imputed_v3.both_sexes.tsv.bgz	0
22617_9149	Job SOC coding: Other goods handling and storage occupations n.e.c.	91149	89870	1279	both_sexes	UKBB	22617_9149.gwas.imputed_v3.both_sexes.tsv.bgz	0
22618_0	Breathing problems improved/stopped away from workplace or on holiday: No	91149	86767	4382	both_sexes	UKBB	22618_0.gwas.imputed_v3.both_sexes.tsv.bgz	0
22618_1	Breathing problems improved/stopped away from workplace or on holiday: Yes	91149	88461	2688	both_sexes	UKBB	22618_1.gwas.imputed_v3.both_sexes.tsv.bgz	0
22619_0	Breathing problems responsible for leaving job: No	91149	85737	5412	both_sexes	UKBB	22619_0.gwas.imputed_v3.both_sexes.tsv.bgz	0
22630_0	Day shifts worked: Shift pattern was worked for some (but not all) of job	25697	23941	1756	both_sexes	UKBB	22630_0.gwas.imputed_v3.both_sexes.tsv.bgz	0
22645	Rest days during mixed shift periods	17248	NA	NA	both_sexes	UKBB	22645.gwas.imputed_v3.both_sexes.tsv.bgz	0
22650_9	Night shifts worked: This type of shift pattern was not worked during job	25697	917	24780	both_sexes	UKBB	22650_9.gwas.imputed_v3.both_sexes.tsv.bgz	0
22660_105	Gap coding: Looking after the home and/or family	69370	44793	24577	both_sexes	UKBB	22660_105.gwas.imputed_v3.both_sexes.tsv.bgz	2
22660_106	Gap coding: Unable to work due to sickness or disability	67892	65864	2028	both_sexes	UKBB	22660_106.gwas.imputed_v3.both_sexes.tsv.bgz	0
22660_107	Gap coding: Unemployed	68042	64432	3610	both_sexes	UKBB	22660_107.gwas.imputed_v3.both_sexes.tsv.bgz	0
22660_108	Gap coding: Retired	70119	16577	53542	both_sexes	UKBB	22660_108.gwas.imputed_v3.both_sexes.tsv.bgz	0
2267	Use of sun/uv protection	358559	NA	NA	both_sexes	UKBB	2267.gwas.imputed_v3.both_sexes.tsv.bgz	169
22702_irnt	Home location - east co-ordinate (rounded)	361187	NA	NA	both_sexes	UKBB	22702_irnt.gwas.imputed_v3.both_sexes.tsv.bgz	30
22704_irnt	Home location - north co-ordinate (rounded)	361187	NA	NA	both_sexes	UKBB	22704_irnt.gwas.imputed_v3.both_sexes.tsv.bgz	6
2277	Frequency of solarium/sunlamp use	340643	NA	NA	both_sexes	UKBB	2277.gwas.imputed_v3.both_sexes.tsv.bgz	0
2306	Weight change compared with 1 year ago	355129	NA	NA	both_sexes	UKBB	2306.gwas.imputed_v3.both_sexes.tsv.bgz	4
23098_irnt	Weight	354838	NA	NA	both_sexes	UKBB	23098_irnt.gwas.imputed_v3.both_sexes.tsv.bgz	2422
23099_irnt	Body fat percentage	354628	NA	NA	both_sexes	UKBB	23099_irnt.gwas.imputed_v3.both_sexes.tsv.bgz	1644
23100_irnt	Whole body fat mass	354244	NA	NA	both_sexes	UKBB	23100_irnt.gwas.imputed_v3.both_sexes.tsv.bgz	2376
23101_irnt	Whole body fat-free mass	354808	NA	NA	both_sexes	UKBB	23101_irnt.gwas.imputed_v3.both_sexes.tsv.bgz	2934
23102_irnt	Whole body water mass	354834	NA	NA	both_sexes	UKBB	23102_irnt.gwas.imputed_v3.both_sexes.tsv.bgz	2876
23104_irnt	Body mass index (BMI)	354831	NA	NA	both_sexes	UKBB	23104_irnt.gwas.imputed_v3.both_sexes.tsv.bgz	1854
23105_irnt	Basal metabolic rate	354825	NA	NA	both_sexes	UKBB	23105_irnt.gwas.imputed_v3.both_sexes.tsv.bgz	3272
23106_irnt	Impedance of whole body	354795	NA	NA	both_sexes	UKBB	23106_irnt.gwas.imputed_v3.both_sexes.tsv.bgz	1966
23107_irnt	Impedance of leg (right)	354817	NA	NA	both_sexes	UKBB	23107_irnt.gwas.imputed_v3.both_sexes.tsv.bgz	1732
23108_irnt	Impedance of leg (left)	354811	NA	NA	both_sexes	UKBB	23108_irnt.gwas.imputed_v3.both_sexes.tsv.bgz	1722
23109_irnt	Impedance of arm (right)	354792	NA	NA	both_sexes	UKBB	23109_irnt.gwas.imputed_v3.both_sexes.tsv.bgz	2274
23110_irnt	Impedance of arm (left)	354807	NA	NA	both_sexes	UKBB	23110_irnt.gwas.imputed_v3.both_sexes.tsv.bgz	2086
23111_irnt	Leg fat percentage (right)	354811	NA	NA	both_sexes	UKBB	23111_irnt.gwas.imputed_v3.both_sexes.tsv.bgz	1346
23112_irnt	Leg fat mass (right)	354807	NA	NA	both_sexes	UKBB	23112_irnt.gwas.imputed_v3.both_sexes.tsv.bgz	1854
23113_irnt	Leg fat-free mass (right)	354798	NA	NA	both_sexes	UKBB	23113_irnt.gwas.imputed_v3.both_sexes.tsv.bgz	2834
23114_irnt	Leg predicted mass (right)	354798	NA	NA	both_sexes	UKBB	23114_irnt.gwas.imputed_v3.both_sexes.tsv.bgz	2648
23115_irnt	Leg fat percentage (left)	354791	NA	NA	both_sexes	UKBB	23115_irnt.gwas.imputed_v3.both_sexes.tsv.bgz	1410
23116_irnt	Leg fat mass (left)	354788	NA	NA	both_sexes	UKBB	23116_irnt.gwas.imputed_v3.both_sexes.tsv.bgz	1934
23117_irnt	Leg fat-free mass (left)	354771	NA	NA	both_sexes	UKBB	23117_irnt.gwas.imputed_v3.both_sexes.tsv.bgz	2444
23118_irnt	Leg predicted mass (left)	354766	NA	NA	both_sexes	UKBB	23118_irnt.gwas.imputed_v3.both_sexes.tsv.bgz	2378
23119_irnt	Arm fat percentage (right)	354760	NA	NA	both_sexes	UKBB	23119_irnt.gwas.imputed_v3.both_sexes.tsv.bgz	1166
23120_irnt	Arm fat mass (right)	354736	NA	NA	both_sexes	UKBB	23120_irnt.gwas.imputed_v3.both_sexes.tsv.bgz	1792
23121_irnt	Arm fat-free mass (right)	354732	NA	NA	both_sexes	UKBB	23121_irnt.gwas.imputed_v3.both_sexes.tsv.bgz	3100
23122_irnt	Arm predicted mass (right)	354726	NA	NA	both_sexes	UKBB	23122_irnt.gwas.imputed_v3.both_sexes.tsv.bgz	2844
23123_irnt	Arm fat percentage (left)	354707	NA	NA	both_sexes	UKBB	23123_irnt.gwas.imputed_v3.both_sexes.tsv.bgz	1254
23124_irnt	Arm fat mass (left)	354673	NA	NA	both_sexes	UKBB	23124_irnt.gwas.imputed_v3.both_sexes.tsv.bgz	1714
23125_irnt	Arm fat-free mass (left)	354668	NA	NA	both_sexes	UKBB	23125_irnt.gwas.imputed_v3.both_sexes.tsv.bgz	2876
23126_irnt	Arm predicted mass (left)	354653	NA	NA	both_sexes	UKBB	23126_irnt.gwas.imputed_v3.both_sexes.tsv.bgz	3038
23127_irnt	Trunk fat percentage	354619	NA	NA	both_sexes	UKBB	23127_irnt.gwas.imputed_v3.both_sexes.tsv.bgz	1854
23128_irnt	Trunk fat mass	354597	NA	NA	both_sexes	UKBB	23128_irnt.gwas.imputed_v3.both_sexes.tsv.bgz	2054
23129_irnt	Trunk fat-free mass	354530	NA	NA	both_sexes	UKBB	23129_irnt.gwas.imputed_v3.both_sexes.tsv.bgz	3006
23130_irnt	Trunk predicted mass	354494	NA	NA	both_sexes	UKBB	23130_irnt.gwas.imputed_v3.both_sexes.tsv.bgz	3008
2316	Wheeze or whistling in the chest in last year	354523	280695	73828	both_sexes	UKBB	2316.gwas.imputed_v3.both_sexes.tsv.bgz	136
2335	Chest pain or discomfort	357507	301274	56233	both_sexes	UKBB	2335.gwas.imputed_v3.both_sexes.tsv.bgz	0
2345	Ever had bowel cancer screening	355353	240878	114475	both_sexes	UKBB	2345.gwas.imputed_v3.both_sexes.tsv.bgz	0
2365	Ever had prostate specific antigen (PSA) test	158108	108649	49459	both_sexes	UKBB	2365.gwas.imputed_v3.both_sexes.tsv.bgz	1
2375	Relative age of first facial hair	161470	NA	NA	both_sexes	UKBB	2375.gwas.imputed_v3.both_sexes.tsv.bgz	109
2385	Relative age voice broke	154459	NA	NA	both_sexes	UKBB	2385.gwas.imputed_v3.both_sexes.tsv.bgz	57
2395_1	Hair/balding pattern: Pattern 1	165649	112573	53076	both_sexes	UKBB	2395_1.gwas.imputed_v3.both_sexes.tsv.bgz	796
2395_2	Hair/balding pattern: Pattern 2	165649	127605	38044	both_sexes	UKBB	2395_2.gwas.imputed_v3.both_sexes.tsv.bgz	22
2395_3	Hair/balding pattern: Pattern 3	165649	121345	44304	both_sexes	UKBB	2395_3.gwas.imputed_v3.both_sexes.tsv.bgz	48
2395_4	Hair/balding pattern: Pattern 4	165649	135424	30225	both_sexes	UKBB	2395_4.gwas.imputed_v3.both_sexes.tsv.bgz	700
24003_irnt	Nitrogen dioxide air pollution; 2010	356078	NA	NA	both_sexes	UKBB	24003_irnt.gwas.imputed_v3.both_sexes.tsv.bgz	0
24007_irnt	Particulate matter air pollution (pm2.5) absorbance; 2010	329886	NA	NA	both_sexes	UKBB	24007_irnt.gwas.imputed_v3.both_sexes.tsv.bgz	0
24010_irnt	Inverse distance to the nearest road	356078	NA	NA	both_sexes	UKBB	24010_irnt.gwas.imputed_v3.both_sexes.tsv.bgz	0
24014	Close to major road	356078	331522	24556	both_sexes	UKBB	24014.gwas.imputed_v3.both_sexes.tsv.bgz	0
24016_irnt	Nitrogen dioxide air pollution; 2005	356078	NA	NA	both_sexes	UKBB	24016_irnt.gwas.imputed_v3.both_sexes.tsv.bgz	0
24017_irnt	Nitrogen dioxide air pollution; 2006	356078	NA	NA	both_sexes	UKBB	24017_irnt.gwas.imputed_v3.both_sexes.tsv.bgz	0
24018_irnt	Nitrogen dioxide air pollution; 2007	356078	NA	NA	both_sexes	UKBB	24018_irnt.gwas.imputed_v3.both_sexes.tsv.bgz	0
24019_irnt	Particulate matter air pollution (pm10); 2007	355245	NA	NA	both_sexes	UKBB	24019_irnt.gwas.imputed_v3.both_sexes.tsv.bgz	0
2405	Number of children fathered	165492	NA	NA	both_sexes	UKBB	2405.gwas.imputed_v3.both_sexes.tsv.bgz	0
2415	Had major operations	165737	59231	106506	both_sexes	UKBB	2415.gwas.imputed_v3.both_sexes.tsv.bgz	0
2443	Diabetes diagnosed by doctor	360192	342917	17275	both_sexes	UKBB	2443.gwas.imputed_v3.both_sexes.tsv.bgz	129
2453	Cancer diagnosed by doctor	359981	331472	28509	both_sexes	UKBB	2453.gwas.imputed_v3.both_sexes.tsv.bgz	14
2463	Fractured/broken bones in last 5 years	359241	324461	34780	both_sexes	UKBB	2463.gwas.imputed_v3.both_sexes.tsv.bgz	8
2473	Other serious medical condition/disability diagnosed by doctor	354588	281623	72965	both_sexes	UKBB	2473.gwas.imputed_v3.both_sexes.tsv.bgz	5
2492	Taking other prescription medications	360027	191034	168993	both_sexes	UKBB	2492.gwas.imputed_v3.both_sexes.tsv.bgz	18
2644	Light smokers, at least 100 smokes in lifetime	97021	52768	44253	both_sexes	UKBB	2644.gwas.imputed_v3.both_sexes.tsv.bgz	2
2654_2	Non-butter spread type details: Flora Pro-Active or Benecol	190094	161046	29048	both_sexes	UKBB	2654_2.gwas.imputed_v3.both_sexes.tsv.bgz	8
2654_4	Non-butter spread type details: Soft (tub) margarine	190094	166469	23625	both_sexes	UKBB	2654_4.gwas.imputed_v3.both_sexes.tsv.bgz	0
2664_3	Reason for reducing amount of alcohol drunk: Health precaution	134033	90165	43868	both_sexes	UKBB	2664_3.gwas.imputed_v3.both_sexes.tsv.bgz	2
2664_5	Reason for reducing amount of alcohol drunk: Other reason	134033	63424	70609	both_sexes	UKBB	2664_5.gwas.imputed_v3.both_sexes.tsv.bgz	0
2704	Years since last cervical smear test	149196	NA	NA	both_sexes	UKBB	2704.gwas.imputed_v3.both_sexes.tsv.bgz	0
2714	Age when periods started (menarche)	188644	NA	NA	both_sexes	UKBB	2714.gwas.imputed_v3.both_sexes.tsv.bgz	245
2724	Had menopause	163184	43829	119355	both_sexes	UKBB	2724.gwas.imputed_v3.both_sexes.tsv.bgz	251
2744	Birth weight of first child	155202	NA	NA	both_sexes	UKBB	2744.gwas.imputed_v3.both_sexes.tsv.bgz	68
2754_irnt	Age at first live birth	131987	NA	NA	both_sexes	UKBB	2754_irnt.gwas.imputed_v3.both_sexes.tsv.bgz	40
2764_irnt	Age at last live birth	131806	NA	NA	both_sexes	UKBB	2764_irnt.gwas.imputed_v3.both_sexes.tsv.bgz	32
2794_irnt	Age started oral contraceptive pill	154112	NA	NA	both_sexes	UKBB	2794_irnt.gwas.imputed_v3.both_sexes.tsv.bgz	30
2814	Ever used hormone-replacement therapy (HRT)	193606	117427	76179	both_sexes	UKBB	2814.gwas.imputed_v3.both_sexes.tsv.bgz	34
2834	Bilateral oophorectomy (both ovaries removed)	191515	175886	15629	both_sexes	UKBB	2834.gwas.imputed_v3.both_sexes.tsv.bgz	19
2844	Had other major operations	192470	63035	129435	both_sexes	UKBB	2844.gwas.imputed_v3.both_sexes.tsv.bgz	0
2877_1	Type of tobacco previously smoked: Manufactured cigarettes	89224	10111	79113	both_sexes	UKBB	2877_1.gwas.imputed_v3.both_sexes.tsv.bgz	0
2887	Number of cigarettes previously smoked daily	84456	NA	NA	both_sexes	UKBB	2887.gwas.imputed_v3.both_sexes.tsv.bgz	8
2907	Ever stopped smoking for 6+ months	87937	50034	37903	both_sexes	UKBB	2907.gwas.imputed_v3.both_sexes.tsv.bgz	4
2926	Number of unsuccessful stop-smoking attempts	81026	NA	NA	both_sexes	UKBB	2926.gwas.imputed_v3.both_sexes.tsv.bgz	1
2966_irnt	Age high blood pressure diagnosed	87024	NA	NA	both_sexes	UKBB	2966_irnt.gwas.imputed_v3.both_sexes.tsv.bgz	2
2976_irnt	Age diabetes diagnosed	16166	NA	NA	both_sexes	UKBB	2976_irnt.gwas.imputed_v3.both_sexes.tsv.bgz	6
2986	Started insulin within one year diagnosis of diabetes	16415	14416	1999	both_sexes	UKBB	2986.gwas.imputed_v3.both_sexes.tsv.bgz	5
30000_irnt	White blood cell (leukocyte) count	350470	NA	NA	both_sexes	UKBB	30000_irnt.gwas.imputed_v3.both_sexes.tsv.bgz	2046
30010_irnt	Red blood cell (erythrocyte) count	350475	NA	NA	both_sexes	UKBB	30010_irnt.gwas.imputed_v3.both_sexes.tsv.bgz	2428
30020_irnt	Haemoglobin concentration	350474	NA	NA	both_sexes	UKBB	30020_irnt.gwas.imputed_v3.both_sexes.tsv.bgz	2168
30030_irnt	Haematocrit percentage	350475	NA	NA	both_sexes	UKBB	30030_irnt.gwas.imputed_v3.both_sexes.tsv.bgz	1666
30040_irnt	Mean corpuscular volume	350473	NA	NA	both_sexes	UKBB	30040_irnt.gwas.imputed_v3.both_sexes.tsv.bgz	2678
30050_irnt	Mean corpuscular haemoglobin	350472	NA	NA	both_sexes	UKBB	30050_irnt.gwas.imputed_v3.both_sexes.tsv.bgz	2194
30060_irnt	Mean corpuscular haemoglobin concentration	350468	NA	NA	both_sexes	UKBB	30060_irnt.gwas.imputed_v3.both_sexes.tsv.bgz	640
30070_irnt	Red blood cell (erythrocyte) distribution width	350473	NA	NA	both_sexes	UKBB	30070_irnt.gwas.imputed_v3.both_sexes.tsv.bgz	3328
30080_irnt	Platelet count	350474	NA	NA	both_sexes	UKBB	30080_irnt.gwas.imputed_v3.both_sexes.tsv.bgz	2522
30090_irnt	Platelet crit	350471	NA	NA	both_sexes	UKBB	30090_irnt.gwas.imputed_v3.both_sexes.tsv.bgz	2336
30100_irnt	Mean platelet (thrombocyte) volume	350470	NA	NA	both_sexes	UKBB	30100_irnt.gwas.imputed_v3.both_sexes.tsv.bgz	2880
30110_irnt	Platelet distribution width	350470	NA	NA	both_sexes	UKBB	30110_irnt.gwas.imputed_v3.both_sexes.tsv.bgz	2396
30120_irnt	Lymphocyte count	349856	NA	NA	both_sexes	UKBB	30120_irnt.gwas.imputed_v3.both_sexes.tsv.bgz	1882
30130_irnt	Monocyte count	349856	NA	NA	both_sexes	UKBB	30130_irnt.gwas.imputed_v3.both_sexes.tsv.bgz	1772
30140_irnt	Neutrophill count	349856	NA	NA	both_sexes	UKBB	30140_irnt.gwas.imputed_v3.both_sexes.tsv.bgz	1684
30150	Eosinophill count	349856	NA	NA	both_sexes	UKBB	30150.gwas.imputed_v3.both_sexes.tsv.bgz	653
30160	Basophill count	349856	NA	NA	both_sexes	UKBB	30160.gwas.imputed_v3.both_sexes.tsv.bgz	63
30170	Nucleated red blood cell count	349848	NA	NA	both_sexes	UKBB	30170.gwas.imputed_v3.both_sexes.tsv.bgz	6
30180_irnt	Lymphocyte percentage	349861	NA	NA	both_sexes	UKBB	30180_irnt.gwas.imputed_v3.both_sexes.tsv.bgz	2442
30190_irnt	Monocyte percentage	349861	NA	NA	both_sexes	UKBB	30190_irnt.gwas.imputed_v3.both_sexes.tsv.bgz	2722
30200_irnt	Neutrophill percentage	349861	NA	NA	both_sexes	UKBB	30200_irnt.gwas.imputed_v3.both_sexes.tsv.bgz	2078
30210_irnt	Eosinophill percentage	349861	NA	NA	both_sexes	UKBB	30210_irnt.gwas.imputed_v3.both_sexes.tsv.bgz	1770
30220_irnt	Basophill percentage	349861	NA	NA	both_sexes	UKBB	30220_irnt.gwas.imputed_v3.both_sexes.tsv.bgz	406
30230	Nucleated red blood cell percentage	349845	NA	NA	both_sexes	UKBB	30230.gwas.imputed_v3.both_sexes.tsv.bgz	6
30240_irnt	Reticulocyte percentage	344728	NA	NA	both_sexes	UKBB	30240_irnt.gwas.imputed_v3.both_sexes.tsv.bgz	1588
30250_irnt	Reticulocyte count	344729	NA	NA	both_sexes	UKBB	30250_irnt.gwas.imputed_v3.both_sexes.tsv.bgz	1978
30260_irnt	Mean reticulocyte volume	344728	NA	NA	both_sexes	UKBB	30260_irnt.gwas.imputed_v3.both_sexes.tsv.bgz	2914
30270_irnt	Mean sphered cell volume	344729	NA	NA	both_sexes	UKBB	30270_irnt.gwas.imputed_v3.both_sexes.tsv.bgz	2318
30280_irnt	Immature reticulocyte fraction	344728	NA	NA	both_sexes	UKBB	30280_irnt.gwas.imputed_v3.both_sexes.tsv.bgz	1856
30290_irnt	High light scatter reticulocyte percentage	344729	NA	NA	both_sexes	UKBB	30290_irnt.gwas.imputed_v3.both_sexes.tsv.bgz	1868
30300_irnt	High light scatter reticulocyte count	344729	NA	NA	both_sexes	UKBB	30300_irnt.gwas.imputed_v3.both_sexes.tsv.bgz	2142
30500_irnt	Microalbumin in urine	108706	NA	NA	both_sexes	UKBB	30500_irnt.gwas.imputed_v3.both_sexes.tsv.bgz	8
30510_irnt	Creatinine (enzymatic) in urine	350812	NA	NA	both_sexes	UKBB	30510_irnt.gwas.imputed_v3.both_sexes.tsv.bgz	54
30520_irnt	Potassium in urine	350053	NA	NA	both_sexes	UKBB	30520_irnt.gwas.imputed_v3.both_sexes.tsv.bgz	182
30530_irnt	Sodium in urine	350061	NA	NA	both_sexes	UKBB	30530_irnt.gwas.imputed_v3.both_sexes.tsv.bgz	156
3062_irnt	Forced vital capacity (FVC)	329404	NA	NA	both_sexes	UKBB	3062_irnt.gwas.imputed_v3.both_sexes.tsv.bgz	1994
3063_irnt	Forced expiratory volume in 1-second (FEV1)	329404	NA	NA	both_sexes	UKBB	3063_irnt.gwas.imputed_v3.both_sexes.tsv.bgz	1130
3064_irnt	Peak expiratory flow (PEF)	329404	NA	NA	both_sexes	UKBB	3064_irnt.gwas.imputed_v3.both_sexes.tsv.bgz	400
3079	Pace-maker	360866	359727	1139	both_sexes	UKBB	3079.gwas.imputed_v3.both_sexes.tsv.bgz	0
3082	Fractured heel	238226	140	238086	both_sexes	UKBB	3082.gwas.imputed_v3.both_sexes.tsv.bgz	0
3090	Used an inhaler for chest within last hour	331625	329201	2424	both_sexes	UKBB	3090.gwas.imputed_v3.both_sexes.tsv.bgz	0
3143_irnt	Ankle spacing width	206589	NA	NA	both_sexes	UKBB	3143_irnt.gwas.imputed_v3.both_sexes.tsv.bgz	960
3144_irnt	Heel Broadband ultrasound attenuation, direct entry	206576	NA	NA	both_sexes	UKBB	3144_irnt.gwas.imputed_v3.both_sexes.tsv.bgz	604
3147_irnt	Heel quantitative ultrasound index (QUI), direct entry	206589	NA	NA	both_sexes	UKBB	3147_irnt.gwas.imputed_v3.both_sexes.tsv.bgz	808
3148_irnt	Heel bone mineral density (BMD)	206496	NA	NA	both_sexes	UKBB	3148_irnt.gwas.imputed_v3.both_sexes.tsv.bgz	804
3393	Hearing aid user	219358	208416	10942	both_sexes	UKBB	3393.gwas.imputed_v3.both_sexes.tsv.bgz	3
3404	Neck/shoulder pain for 3+ months	81276	25120	56156	both_sexes	UKBB	3404.gwas.imputed_v3.both_sexes.tsv.bgz	0
3414	Hip pain for 3+ months	40061	8758	31303	both_sexes	UKBB	3414.gwas.imputed_v3.both_sexes.tsv.bgz	0
3456	Number of cigarettes currently smoked daily (current cigarette smokers)	25348	NA	NA	both_sexes	UKBB	3456.gwas.imputed_v3.both_sexes.tsv.bgz	5
3466	Time from waking to first cigarette	25414	NA	NA	both_sexes	UKBB	3466.gwas.imputed_v3.both_sexes.tsv.bgz	3
3476	Difficulty not smoking for 1 day	25487	NA	NA	both_sexes	UKBB	3476.gwas.imputed_v3.both_sexes.tsv.bgz	1
3486	Ever tried to stop smoking	27467	NA	NA	both_sexes	UKBB	3486.gwas.imputed_v3.both_sexes.tsv.bgz	0
3526_irnt	Mother's age at death	213636	NA	NA	both_sexes	UKBB	3526_irnt.gwas.imputed_v3.both_sexes.tsv.bgz	0
3536_irnt	Age started hormone-replacement therapy (HRT)	68299	NA	NA	both_sexes	UKBB	3536_irnt.gwas.imputed_v3.both_sexes.tsv.bgz	234
3581_irnt	Age at menopause (last menstrual period)	111593	NA	NA	both_sexes	UKBB	3581_irnt.gwas.imputed_v3.both_sexes.tsv.bgz	1152
3591	Ever had hysterectomy (womb removed)	171413	157440	13973	both_sexes	UKBB	3591.gwas.imputed_v3.both_sexes.tsv.bgz	0
3637	Frequency of other exercises in last 4 weeks	172505	NA	NA	both_sexes	UKBB	3637.gwas.imputed_v3.both_sexes.tsv.bgz	0
3710	Length of menstrual cycle	32847	NA	NA	both_sexes	UKBB	3710.gwas.imputed_v3.both_sexes.tsv.bgz	4
3731	Former alcohol drinker	23745	11181	12564	both_sexes	UKBB	3731.gwas.imputed_v3.both_sexes.tsv.bgz	0
3751	Chest pain or discomfort when walking uphill or hurrying	44867	32929	11938	both_sexes	UKBB	3751.gwas.imputed_v3.both_sexes.tsv.bgz	0
3761_irnt	Age hay fever, rhinitis or eczema diagnosed	72232	NA	NA	both_sexes	UKBB	3761_irnt.gwas.imputed_v3.both_sexes.tsv.bgz	122
3786_irnt	Age asthma diagnosed	36955	NA	NA	both_sexes	UKBB	3786_irnt.gwas.imputed_v3.both_sexes.tsv.bgz	80
3799	Headaches for 3+ months	70181	38106	32075	both_sexes	UKBB	3799.gwas.imputed_v3.both_sexes.tsv.bgz	1
3859_3	Reason former drinker stopped drinking alcohol: Health precaution	12110	9640	2470	both_sexes	UKBB	3859_3.gwas.imputed_v3.both_sexes.tsv.bgz	0
399_irnt	Number of incorrect matches in round	360686	NA	NA	both_sexes	UKBB	399_irnt.gwas.imputed_v3.both_sexes.tsv.bgz	92
40009	Reported occurrences of cancer	58607	NA	NA	both_sexes	UKBB	40009.gwas.imputed_v3.both_sexes.tsv.bgz	1
400_irnt	Time to complete round	354739	NA	NA	both_sexes	UKBB	400_irnt.gwas.imputed_v3.both_sexes.tsv.bgz	398
404_irnt	Duration to first press of snap-button in each round	358500	NA	NA	both_sexes	UKBB	404_irnt.gwas.imputed_v3.both_sexes.tsv.bgz	140
4079_irnt	Diastolic blood pressure, automated reading	340162	NA	NA	both_sexes	UKBB	4079_irnt.gwas.imputed_v3.both_sexes.tsv.bgz	1180
4080_irnt	Systolic blood pressure, automated reading	340159	NA	NA	both_sexes	UKBB	4080_irnt.gwas.imputed_v3.both_sexes.tsv.bgz	1078
4100_irnt	Ankle spacing width (left)	114630	NA	NA	both_sexes	UKBB	4100_irnt.gwas.imputed_v3.both_sexes.tsv.bgz	254
4101_irnt	Heel broadband ultrasound attenuation (left)	114625	NA	NA	both_sexes	UKBB	4101_irnt.gwas.imputed_v3.both_sexes.tsv.bgz	170
4104_irnt	Heel quantitative ultrasound index (QUI), direct entry (left)	114630	NA	NA	both_sexes	UKBB	4104_irnt.gwas.imputed_v3.both_sexes.tsv.bgz	210
4105_irnt	Heel bone mineral density (BMD) (left)	114561	NA	NA	both_sexes	UKBB	4105_irnt.gwas.imputed_v3.both_sexes.tsv.bgz	270
4106_irnt	Heel bone mineral density (BMD) T-score, automated (left)	114630	NA	NA	both_sexes	UKBB	4106_irnt.gwas.imputed_v3.both_sexes.tsv.bgz	210
4119_irnt	Ankle spacing width (right)	114614	NA	NA	both_sexes	UKBB	4119_irnt.gwas.imputed_v3.both_sexes.tsv.bgz	294
4120_irnt	Heel broadband ultrasound attenuation (right)	114609	NA	NA	both_sexes	UKBB	4120_irnt.gwas.imputed_v3.both_sexes.tsv.bgz	162
41215_1	Detention categories: Formally detained under Part II, Mental Health Act 1983	361194	358968	2226	both_sexes	UKBB	41215_1.gwas.imputed_v3.both_sexes.tsv.bgz	0
41231_1	Hospital episode type: General episode	361194	114387	246807	both_sexes	UKBB	41231_1.gwas.imputed_v3.both_sexes.tsv.bgz	122
41235	Spells in hospital	236484	NA	NA	both_sexes	UKBB	41235.gwas.imputed_v3.both_sexes.tsv.bgz	0
4123_irnt	Heel quantitative ultrasound index (QUI), direct entry (right)	114614	NA	NA	both_sexes	UKBB	4123_irnt.gwas.imputed_v3.both_sexes.tsv.bgz	342
41248_1000	Destinations on discharge from hospital (recoded): Usual Place of residence	361058	128424	232634	both_sexes	UKBB	41248_1000.gwas.imputed_v3.both_sexes.tsv.bgz	12
41248_1001	Destinations on discharge from hospital (recoded): Usual Place of residence: Living with relatives	359439	349053	10386	both_sexes	UKBB	41248_1001.gwas.imputed_v3.both_sexes.tsv.bgz	0
41248_2000	Destinations on discharge from hospital (recoded): Temporary place of residence	359468	358331	1137	both_sexes	UKBB	41248_2000.gwas.imputed_v3.both_sexes.tsv.bgz	0
41248_5001	Destinations on discharge from hospital (recoded): Transfer to other NHS provider: General ward, young physically disabled, A&E	359670	354430	5240	both_sexes	UKBB	41248_5001.gwas.imputed_v3.both_sexes.tsv.bgz	0
41248_6000	Destinations on discharge from hospital (recoded): Transfer within NHS provider	359438	357557	1881	both_sexes	UKBB	41248_6000.gwas.imputed_v3.both_sexes.tsv.bgz	0
41248_6005	Destinations on discharge from hospital (recoded): Transfer within NHS provider: Medical specialty	359437	357779	1658	both_sexes	UKBB	41248_6005.gwas.imputed_v3.both_sexes.tsv.bgz	0
4124_irnt	Heel bone mineral density (BMD) (right)	114552	NA	NA	both_sexes	UKBB	4124_irnt.gwas.imputed_v3.both_sexes.tsv.bgz	312
4125_irnt	Heel bone mineral density (BMD) T-score, automated (right)	114614	NA	NA	both_sexes	UKBB	4125_irnt.gwas.imputed_v3.both_sexes.tsv.bgz	342
4194_irnt	Pulse rate	118850	NA	NA	both_sexes	UKBB	4194_irnt.gwas.imputed_v3.both_sexes.tsv.bgz	294
4195_irnt	Pulse wave reflection index	118850	NA	NA	both_sexes	UKBB	4195_irnt.gwas.imputed_v3.both_sexes.tsv.bgz	132
4196_irnt	Pulse wave peak to peak time	118787	NA	NA	both_sexes	UKBB	4196_irnt.gwas.imputed_v3.both_sexes.tsv.bgz	0
4230_irnt	Signal-to-noise-ratio (SNR) of triplet (left)	116790	NA	NA	both_sexes	UKBB	4230_irnt.gwas.imputed_v3.both_sexes.tsv.bgz	0
4233_irnt	Mean signal-to-noise ratio (SNR), (left)	116671	NA	NA	both_sexes	UKBB	4233_irnt.gwas.imputed_v3.both_sexes.tsv.bgz	0
4277	Volume level set by participant (right)	116755	NA	NA	both_sexes	UKBB	4277.gwas.imputed_v3.both_sexes.tsv.bgz	0
4282	Maximum digits remembered correctly	36884	NA	NA	both_sexes	UKBB	4282.gwas.imputed_v3.both_sexes.tsv.bgz	0
4288_irnt	Time to answer	119729	NA	NA	both_sexes	UKBB	4288_irnt.gwas.imputed_v3.both_sexes.tsv.bgz	0
4290_irnt	Duration screen displayed	119729	NA	NA	both_sexes	UKBB	4290_irnt.gwas.imputed_v3.both_sexes.tsv.bgz	134
4291	Number of attempts	119729	23991	95738	both_sexes	UKBB	4291.gwas.imputed_v3.both_sexes.tsv.bgz	67
4451	Average monthly fortified wine intake	26328	NA	NA	both_sexes	UKBB	4451.gwas.imputed_v3.both_sexes.tsv.bgz	0
4501	Non-accidental death in close genetic family	113705	82661	31044	both_sexes	UKBB	4501.gwas.imputed_v3.both_sexes.tsv.bgz	0
4548	Health satisfaction	119567	NA	NA	both_sexes	UKBB	4548.gwas.imputed_v3.both_sexes.tsv.bgz	0
4570	Friendships satisfaction	118649	NA	NA	both_sexes	UKBB	4570.gwas.imputed_v3.both_sexes.tsv.bgz	0
4598	Ever depressed for a whole week	117705	54586	63119	both_sexes	UKBB	4598.gwas.imputed_v3.both_sexes.tsv.bgz	0
4631	Ever unenthusiastic/disinterested for a whole week	115145	72771	42374	both_sexes	UKBB	4631.gwas.imputed_v3.both_sexes.tsv.bgz	20
4653	Ever highly irritable/argumentative for 2 days	117359	96429	20930	both_sexes	UKBB	4653.gwas.imputed_v3.both_sexes.tsv.bgz	1
4674	Private healthcare	119300	NA	NA	both_sexes	UKBB	4674.gwas.imputed_v3.both_sexes.tsv.bgz	13
46_irnt	Hand grip strength (left)	359704	NA	NA	both_sexes	UKBB	46_irnt.gwas.imputed_v3.both_sexes.tsv.bgz	652
4728	Leg pain on walking	118905	92908	25997	both_sexes	UKBB	4728.gwas.imputed_v3.both_sexes.tsv.bgz	3
47_irnt	Hand grip strength (right)	359729	NA	NA	both_sexes	UKBB	47_irnt.gwas.imputed_v3.both_sexes.tsv.bgz	774
4803_0	Tinnitus: No, never	117882	34267	83615	both_sexes	UKBB	4803_0.gwas.imputed_v3.both_sexes.tsv.bgz	0
4803_11	Tinnitus: Yes, now most or all of the time	117882	110143	7739	both_sexes	UKBB	4803_11.gwas.imputed_v3.both_sexes.tsv.bgz	0
4825	Noisy workplace	118972	NA	NA	both_sexes	UKBB	4825.gwas.imputed_v3.both_sexes.tsv.bgz	0
48_irnt	Waist circumference	360564	NA	NA	both_sexes	UKBB	48_irnt.gwas.imputed_v3.both_sexes.tsv.bgz	1462
4946	FI2 : identify largest number	116869	950	115919	both_sexes	UKBB	4946.gwas.imputed_v3.both_sexes.tsv.bgz	0
4957	FI3 : word interpolation	116815	18062	98753	both_sexes	UKBB	4957.gwas.imputed_v3.both_sexes.tsv.bgz	4
4968	FI4 : positional arithmetic	115690	17346	98344	both_sexes	UKBB	4968.gwas.imputed_v3.both_sexes.tsv.bgz	0
4990	FI6 : conditional arithmetic	102181	32237	69944	both_sexes	UKBB	4990.gwas.imputed_v3.both_sexes.tsv.bgz	5
49_irnt	Hip circumference	360521	NA	NA	both_sexes	UKBB	49_irnt.gwas.imputed_v3.both_sexes.tsv.bgz	2530
5001	FI7 : synonym	84560	10534	74026	both_sexes	UKBB	5001.gwas.imputed_v3.both_sexes.tsv.bgz	0
5012	FI8 : chained arithmetic	75692	26606	49086	both_sexes	UKBB	5012.gwas.imputed_v3.both_sexes.tsv.bgz	2
5084_irnt	Spherical power (right)	77983	NA	NA	both_sexes	UKBB	5084_irnt.gwas.imputed_v3.both_sexes.tsv.bgz	294
5085_irnt	Spherical power (left)	77739	NA	NA	both_sexes	UKBB	5085_irnt.gwas.imputed_v3.both_sexes.tsv.bgz	358
5086_irnt	Cylindrical power (left)	77739	NA	NA	both_sexes	UKBB	5086_irnt.gwas.imputed_v3.both_sexes.tsv.bgz	4
5087_irnt	Cylindrical power (right)	77983	NA	NA	both_sexes	UKBB	5087_irnt.gwas.imputed_v3.both_sexes.tsv.bgz	4
5089_irnt	Astigmatism angle (left)	77739	NA	NA	both_sexes	UKBB	5089_irnt.gwas.imputed_v3.both_sexes.tsv.bgz	86
5096_irnt	3mm weak meridian (left)	75398	NA	NA	both_sexes	UKBB	5096_irnt.gwas.imputed_v3.both_sexes.tsv.bgz	272
5097_irnt	6mm weak meridian (left)	65551	NA	NA	both_sexes	UKBB	5097_irnt.gwas.imputed_v3.both_sexes.tsv.bgz	424
5098_irnt	6mm weak meridian (right)	66256	NA	NA	both_sexes	UKBB	5098_irnt.gwas.imputed_v3.both_sexes.tsv.bgz	226
5099_irnt	3mm weak meridian (right)	75410	NA	NA	both_sexes	UKBB	5099_irnt.gwas.imputed_v3.both_sexes.tsv.bgz	294
50_irnt	Standing height	360388	NA	NA	both_sexes	UKBB	50_irnt.gwas.imputed_v3.both_sexes.tsv.bgz	4792
5100_irnt	3mm weak meridian angle (right)	75410	NA	NA	both_sexes	UKBB	5100_irnt.gwas.imputed_v3.both_sexes.tsv.bgz	0
5104_irnt	3mm strong meridian angle (left)	75398	NA	NA	both_sexes	UKBB	5104_irnt.gwas.imputed_v3.both_sexes.tsv.bgz	0
5105_irnt	6mm strong meridian angle (left)	65551	NA	NA	both_sexes	UKBB	5105_irnt.gwas.imputed_v3.both_sexes.tsv.bgz	0
5106_irnt	6mm strong meridian angle (right)	66256	NA	NA	both_sexes	UKBB	5106_irnt.gwas.imputed_v3.both_sexes.tsv.bgz	0
5107_irnt	3mm strong meridian angle (right)	75410	NA	NA	both_sexes	UKBB	5107_irnt.gwas.imputed_v3.both_sexes.tsv.bgz	0
5109_irnt	6mm asymmetry angle (right)	41390	NA	NA	both_sexes	UKBB	5109_irnt.gwas.imputed_v3.both_sexes.tsv.bgz	0
5110_irnt	6mm asymmetry angle (left)	40683	NA	NA	both_sexes	UKBB	5110_irnt.gwas.imputed_v3.both_sexes.tsv.bgz	0
5111_irnt	3mm asymmetry angle (left)	73818	NA	NA	both_sexes	UKBB	5111_irnt.gwas.imputed_v3.both_sexes.tsv.bgz	0
5115_irnt	3mm cylindrical power angle (right)	75401	NA	NA	both_sexes	UKBB	5115_irnt.gwas.imputed_v3.both_sexes.tsv.bgz	0
5116_irnt	3mm cylindrical power (right)	75410	NA	NA	both_sexes	UKBB	5116_irnt.gwas.imputed_v3.both_sexes.tsv.bgz	20
5117_irnt	6mm cylindrical power (right)	66256	NA	NA	both_sexes	UKBB	5117_irnt.gwas.imputed_v3.both_sexes.tsv.bgz	4
5118_irnt	6mm cylindrical power (left)	65551	NA	NA	both_sexes	UKBB	5118_irnt.gwas.imputed_v3.both_sexes.tsv.bgz	8
5119_irnt	3mm cylindrical power (left)	75398	NA	NA	both_sexes	UKBB	5119_irnt.gwas.imputed_v3.both_sexes.tsv.bgz	14
5132_irnt	3mm strong meridian (right)	75410	NA	NA	both_sexes	UKBB	5132_irnt.gwas.imputed_v3.both_sexes.tsv.bgz	246
5133_irnt	6mm strong meridian (right)	66256	NA	NA	both_sexes	UKBB	5133_irnt.gwas.imputed_v3.both_sexes.tsv.bgz	206
5134_irnt	6mm strong meridian (left)	65551	NA	NA	both_sexes	UKBB	5134_irnt.gwas.imputed_v3.both_sexes.tsv.bgz	460
5135_irnt	3mm strong meridian (left)	75398	NA	NA	both_sexes	UKBB	5135_irnt.gwas.imputed_v3.both_sexes.tsv.bgz	252
5156_irnt	3mm asymmetry index (left)	73818	NA	NA	both_sexes	UKBB	5156_irnt.gwas.imputed_v3.both_sexes.tsv.bgz	0
5157_irnt	6mm asymmetry index (left)	40683	NA	NA	both_sexes	UKBB	5157_irnt.gwas.imputed_v3.both_sexes.tsv.bgz	2
5158_irnt	6mm asymmetry index (right)	41390	NA	NA	both_sexes	UKBB	5158_irnt.gwas.imputed_v3.both_sexes.tsv.bgz	86
5162_irnt	6mm regularity index (left)	40700	NA	NA	both_sexes	UKBB	5162_irnt.gwas.imputed_v3.both_sexes.tsv.bgz	0
5163_irnt	3mm regularity index (left)	73829	NA	NA	both_sexes	UKBB	5163_irnt.gwas.imputed_v3.both_sexes.tsv.bgz	0
5182_1	Both eyes present: Yes	80386	103	80283	both_sexes	UKBB	5182_1.gwas.imputed_v3.both_sexes.tsv.bgz	0
5201_irnt	logMAR, final (right)	79293	NA	NA	both_sexes	UKBB	5201_irnt.gwas.imputed_v3.both_sexes.tsv.bgz	20
5208_irnt	logMAR, final (left)	79239	NA	NA	both_sexes	UKBB	5208_irnt.gwas.imputed_v3.both_sexes.tsv.bgz	28
5251	6mm index of best keratometry results (right)	66256	NA	NA	both_sexes	UKBB	5251.gwas.imputed_v3.both_sexes.tsv.bgz	0
5254_irnt	Intra-ocular pressure, corneal-compensated (right)	76630	NA	NA	both_sexes	UKBB	5254_irnt.gwas.imputed_v3.both_sexes.tsv.bgz	310
5255_irnt	Intra-ocular pressure, Goldmann-correlated (right)	76630	NA	NA	both_sexes	UKBB	5255_irnt.gwas.imputed_v3.both_sexes.tsv.bgz	324
5256_irnt	Corneal hysteresis (right)	76630	NA	NA	both_sexes	UKBB	5256_irnt.gwas.imputed_v3.both_sexes.tsv.bgz	312
5257_irnt	Corneal resistance factor (right)	76630	NA	NA	both_sexes	UKBB	5257_irnt.gwas.imputed_v3.both_sexes.tsv.bgz	320
5262_irnt	Intra-ocular pressure, corneal-compensated (left)	76510	NA	NA	both_sexes	UKBB	5262_irnt.gwas.imputed_v3.both_sexes.tsv.bgz	94
5263_irnt	Intra-ocular pressure, Goldmann-correlated (left)	76510	NA	NA	both_sexes	UKBB	5263_irnt.gwas.imputed_v3.both_sexes.tsv.bgz	246
5264_irnt	Corneal hysteresis (left)	76510	NA	NA	both_sexes	UKBB	5264_irnt.gwas.imputed_v3.both_sexes.tsv.bgz	286
5265_irnt	Corneal resistance factor (left)	76510	NA	NA	both_sexes	UKBB	5265_irnt.gwas.imputed_v3.both_sexes.tsv.bgz	402
5292	3mm index of best keratometry results (left)	75398	NA	NA	both_sexes	UKBB	5292.gwas.imputed_v3.both_sexes.tsv.bgz	0
5386	Number of unenthusiastic/disinterested episodes	30001	NA	NA	both_sexes	UKBB	5386.gwas.imputed_v3.both_sexes.tsv.bgz	0
5485	Leg pain when walking normally	25305	10993	14312	both_sexes	UKBB	5485.gwas.imputed_v3.both_sexes.tsv.bgz	0
5540_0	Surgery/amputation of toe or leg: No	25891	287	25604	both_sexes	UKBB	5540_0.gwas.imputed_v3.both_sexes.tsv.bgz	0
5832_1	Which eye(s) affected by hypermetropia (long sight): Right eye	15090	13964	1126	both_sexes	UKBB	5832_1.gwas.imputed_v3.both_sexes.tsv.bgz	0
5832_2	Which eye(s) affected by hypermetropia (long sight): Left eye	15090	14032	1058	both_sexes	UKBB	5832_2.gwas.imputed_v3.both_sexes.tsv.bgz	0
5843_2	Which eye(s) affected by myopia (short sight): Left eye	29317	27791	1526	both_sexes	UKBB	5843_2.gwas.imputed_v3.both_sexes.tsv.bgz	0
5983_irnt	ECG, heart rate	53777	NA	NA	both_sexes	UKBB	5983_irnt.gwas.imputed_v3.both_sexes.tsv.bgz	128
5984_irnt	ECG, load	53843	NA	NA	both_sexes	UKBB	5984_irnt.gwas.imputed_v3.both_sexes.tsv.bgz	6
5986_irnt	ECG, phase time	53998	NA	NA	both_sexes	UKBB	5986_irnt.gwas.imputed_v3.both_sexes.tsv.bgz	0
6020_33	Completion status of test: Heart rate reached safety level	54007	51084	2923	both_sexes	UKBB	6020_33.gwas.imputed_v3.both_sexes.tsv.bgz	0
6032_irnt	Maximum workload during fitness test	53998	NA	NA	both_sexes	UKBB	6032_irnt.gwas.imputed_v3.both_sexes.tsv.bgz	6
6033_irnt	Maximum heart rate during fitness test	53984	NA	NA	both_sexes	UKBB	6033_irnt.gwas.imputed_v3.both_sexes.tsv.bgz	128
6070_6	OCT measured (right): Not performed - equipment failure	54608	49232	5376	both_sexes	UKBB	6070_6.gwas.imputed_v3.both_sexes.tsv.bgz	0
6070_7	OCT measured (right): Not performed - other reason	54608	52401	2207	both_sexes	UKBB	6070_7.gwas.imputed_v3.both_sexes.tsv.bgz	0
6072_6	OCT measured (left): Not performed - equipment failure	54601	49061	5540	both_sexes	UKBB	6072_6.gwas.imputed_v3.both_sexes.tsv.bgz	0
6138_1	Qualifications: College or University degree	357549	241568	115981	both_sexes	UKBB	6138_1.gwas.imputed_v3.both_sexes.tsv.bgz	654
6138_100	Qualifications: None of the above	357549	296456	61093	both_sexes	UKBB	6138_100.gwas.imputed_v3.both_sexes.tsv.bgz	164
6138_2	Qualifications: A levels/AS levels or equivalent	357549	259245	98304	both_sexes	UKBB	6138_2.gwas.imputed_v3.both_sexes.tsv.bgz	162
6138_3	Qualifications: O levels/GCSEs or equivalent	357549	188877	168672	both_sexes	UKBB	6138_3.gwas.imputed_v3.both_sexes.tsv.bgz	18
6138_4	Qualifications: CSEs or equivalent	357549	310877	46672	both_sexes	UKBB	6138_4.gwas.imputed_v3.both_sexes.tsv.bgz	0
6138_5	Qualifications: NVQ or HND or HNC or equivalent	357549	291005	66544	both_sexes	UKBB	6138_5.gwas.imputed_v3.both_sexes.tsv.bgz	0
6138_6	Qualifications: Other professional qualifications eg: nursing, teaching	357549	253308	104241	both_sexes	UKBB	6138_6.gwas.imputed_v3.both_sexes.tsv.bgz	8
6139_2	Gas or solid-fuel cooking/heating: A gas fire that you use regularly in winter time	360066	214751	145315	both_sexes	UKBB	6139_2.gwas.imputed_v3.both_sexes.tsv.bgz	0
6141_1	How are people in household related to participant: Husband, wife or partner	358963	93225	265738	both_sexes	UKBB	6141_1.gwas.imputed_v3.both_sexes.tsv.bgz	0
6141_3	How are people in household related to participant: Brother and/or sister	358963	357312	1651	both_sexes	UKBB	6141_3.gwas.imputed_v3.both_sexes.tsv.bgz	0
6142_2	Current employment status: Retired	359931	227000	132931	both_sexes	UKBB	6142_2.gwas.imputed_v3.both_sexes.tsv.bgz	0
6142_4	Current employment status: Unable to work because of sickness or disability	359931	346175	13756	both_sexes	UKBB	6142_4.gwas.imputed_v3.both_sexes.tsv.bgz	0
6142_5	Current employment status: Unemployed	359931	354237	5694	both_sexes	UKBB	6142_5.gwas.imputed_v3.both_sexes.tsv.bgz	0
6142_6	Current employment status: Doing unpaid or voluntary work	359931	346623	13308	both_sexes	UKBB	6142_6.gwas.imputed_v3.both_sexes.tsv.bgz	0
6143_1	Transport type for commuting to job workplace: Car/motor vehicle	190832	38351	152481	both_sexes	UKBB	6143_1.gwas.imputed_v3.both_sexes.tsv.bgz	0
6143_2	Transport type for commuting to job workplace: Walk	190832	160545	30287	both_sexes	UKBB	6143_2.gwas.imputed_v3.both_sexes.tsv.bgz	0
6143_3	Transport type for commuting to job workplace: Public transport	190832	151177	39655	both_sexes	UKBB	6143_3.gwas.imputed_v3.both_sexes.tsv.bgz	12
6143_4	Transport type for commuting to job workplace: Cycle	190832	175947	14885	both_sexes	UKBB	6143_4.gwas.imputed_v3.both_sexes.tsv.bgz	2
6144_3	Never eat eggs, dairy, wheat, sugar: Wheat products	359777	350204	9573	both_sexes	UKBB	6144_3.gwas.imputed_v3.both_sexes.tsv.bgz	84
6144_4	Never eat eggs, dairy, wheat, sugar: Sugar or foods/drinks containing sugar	359777	292485	67292	both_sexes	UKBB	6144_4.gwas.imputed_v3.both_sexes.tsv.bgz	102
6144_5	Never eat eggs, dairy, wheat, sugar: I eat all of the above	359777	81615	278162	both_sexes	UKBB	6144_5.gwas.imputed_v3.both_sexes.tsv.bgz	26
6145_100	Illness, injury, bereavement, stress in last 2 years: None of the above	358836	156985	201851	both_sexes	UKBB	6145_100.gwas.imputed_v3.both_sexes.tsv.bgz	0
6145_6	Illness, injury, bereavement, stress in last 2 years: Financial difficulties	358836	318166	40670	both_sexes	UKBB	6145_6.gwas.imputed_v3.both_sexes.tsv.bgz	2
6146_100	Attendance/disability/mobility allowance: None of the above	358597	20718	337879	both_sexes	UKBB	6146_100.gwas.imputed_v3.both_sexes.tsv.bgz	0
6146_2	Attendance/disability/mobility allowance: Disability living allowance	358597	342900	15697	both_sexes	UKBB	6146_2.gwas.imputed_v3.both_sexes.tsv.bgz	0
6146_3	Attendance/disability/mobility allowance: Blue badge	358597	345864	12733	both_sexes	UKBB	6146_3.gwas.imputed_v3.both_sexes.tsv.bgz	0
6147_1	Reason for glasses/contact lenses: For short-sightedness, i.e. only or mainly for distance viewing such as driving, cinema etc (called 'myopia')	360677	331359	29318	both_sexes	UKBB	6147_1.gwas.imputed_v3.both_sexes.tsv.bgz	8
6147_2	Reason for glasses/contact lenses: For long-sightedness, i.e. for distance and near, but particularly for near tasks like reading (called 'hypermetropia')	360677	345586	15091	both_sexes	UKBB	6147_2.gwas.imputed_v3.both_sexes.tsv.bgz	0
6147_3	Reason for glasses/contact lenses: For just reading/near work as you are getting older (called 'presbyopia')	360677	329181	31496	both_sexes	UKBB	6147_3.gwas.imputed_v3.both_sexes.tsv.bgz	0
6147_4	Reason for glasses/contact lenses: For 'astigmatism'	360677	350925	9752	both_sexes	UKBB	6147_4.gwas.imputed_v3.both_sexes.tsv.bgz	6
6147_5	Reason for glasses/contact lenses: For a 'squint' or 'turn' in an eye since childhood (called 'strabismus')	360677	359111	1566	both_sexes	UKBB	6147_5.gwas.imputed_v3.both_sexes.tsv.bgz	0
6147_6	Reason for glasses/contact lenses: For a 'lazy' eye or an eye with poor vision since childhood (called 'amblyopia')	360677	357713	2964	both_sexes	UKBB	6147_6.gwas.imputed_v3.both_sexes.tsv.bgz	6
6148_1	Eye problems/disorders: Diabetes related eye disease	117890	115641	2249	both_sexes	UKBB	6148_1.gwas.imputed_v3.both_sexes.tsv.bgz	0
6148_100	Eye problems/disorders: None of the above	117890	25949	91941	both_sexes	UKBB	6148_100.gwas.imputed_v3.both_sexes.tsv.bgz	8
6148_2	Eye problems/disorders: Glaucoma	117890	112798	5092	both_sexes	UKBB	6148_2.gwas.imputed_v3.both_sexes.tsv.bgz	48
6148_3	Eye problems/disorders: Injury or trauma resulting in loss of vision	117890	115739	2151	both_sexes	UKBB	6148_3.gwas.imputed_v3.both_sexes.tsv.bgz	0
6148_4	Eye problems/disorders: Cataract	117890	106696	11194	both_sexes	UKBB	6148_4.gwas.imputed_v3.both_sexes.tsv.bgz	2
6148_5	Eye problems/disorders: Macular degeneration	117890	115164	2726	both_sexes	UKBB	6148_5.gwas.imputed_v3.both_sexes.tsv.bgz	2
6148_6	Eye problems/disorders: Other serious eye condition	117890	111303	6587	both_sexes	UKBB	6148_6.gwas.imputed_v3.both_sexes.tsv.bgz	10
6149_1	Mouth/teeth dental problems: Mouth ulcers	359841	323010	36831	both_sexes	UKBB	6149_1.gwas.imputed_v3.both_sexes.tsv.bgz	32
6149_100	Mouth/teeth dental problems: None of the above	359841	141495	218346	both_sexes	UKBB	6149_100.gwas.imputed_v3.both_sexes.tsv.bgz	56
6149_3	Mouth/teeth dental problems: Bleeding gums	359841	313147	46694	both_sexes	UKBB	6149_3.gwas.imputed_v3.both_sexes.tsv.bgz	0
6149_4	Mouth/teeth dental problems: Loose teeth	359841	345477	14364	both_sexes	UKBB	6149_4.gwas.imputed_v3.both_sexes.tsv.bgz	2
6149_6	Mouth/teeth dental problems: Dentures	359841	298864	60977	both_sexes	UKBB	6149_6.gwas.imputed_v3.both_sexes.tsv.bgz	106
6150_1	Vascular/heart problems diagnosed by doctor: Heart attack	360420	352132	8288	both_sexes	UKBB	6150_1.gwas.imputed_v3.both_sexes.tsv.bgz	32
6150_100	Vascular/heart problems diagnosed by doctor: None of the above	360420	106855	253565	both_sexes	UKBB	6150_100.gwas.imputed_v3.both_sexes.tsv.bgz	880
6150_2	Vascular/heart problems diagnosed by doctor: Angina	360420	349048	11372	both_sexes	UKBB	6150_2.gwas.imputed_v3.both_sexes.tsv.bgz	30
6150_4	Vascular/heart problems diagnosed by doctor: High blood pressure	360420	263281	97139	both_sexes	UKBB	6150_4.gwas.imputed_v3.both_sexes.tsv.bgz	870
6151_1	Fractured bone site(s): Ankle	359241	354173	5068	both_sexes	UKBB	6151_1.gwas.imputed_v3.both_sexes.tsv.bgz	0
6151_5	Fractured bone site(s): Wrist	359241	352041	7200	both_sexes	UKBB	6151_5.gwas.imputed_v3.both_sexes.tsv.bgz	12
6151_7	Fractured bone site(s): Other bones	359241	340454	18787	both_sexes	UKBB	6151_7.gwas.imputed_v3.both_sexes.tsv.bgz	2
6152_100	Blood clot, DVT, bronchitis, emphysema, asthma, rhinitis, eczema, allergy diagnosed by doctor: None of the above	360527	116005	244522	both_sexes	UKBB	6152_100.gwas.imputed_v3.both_sexes.tsv.bgz	592
6152_5	Blood clot, DVT, bronchitis, emphysema, asthma, rhinitis, eczema, allergy diagnosed by doctor: Blood clot in the leg (DVT)	360527	353141	7386	both_sexes	UKBB	6152_5.gwas.imputed_v3.both_sexes.tsv.bgz	50
6152_6	Blood clot, DVT, bronchitis, emphysema, asthma, rhinitis, eczema, allergy diagnosed by doctor: Emphysema/chronic bronchitis	360527	354389	6138	both_sexes	UKBB	6152_6.gwas.imputed_v3.both_sexes.tsv.bgz	0
6152_7	Blood clot, DVT, bronchitis, emphysema, asthma, rhinitis, eczema, allergy diagnosed by doctor: Blood clot in the lung	360527	357543	2984	both_sexes	UKBB	6152_7.gwas.imputed_v3.both_sexes.tsv.bgz	10
6152_8	Blood clot, DVT, bronchitis, emphysema, asthma, rhinitis, eczema, allergy diagnosed by doctor: Asthma	360527	318894	41633	both_sexes	UKBB	6152_8.gwas.imputed_v3.both_sexes.tsv.bgz	318
6152_9	Blood clot, DVT, bronchitis, emphysema, asthma, rhinitis, eczema, allergy diagnosed by doctor: Hayfever, allergic rhinitis or eczema	360527	277120	83407	both_sexes	UKBB	6152_9.gwas.imputed_v3.both_sexes.tsv.bgz	608
6153_1	Medication for cholesterol, blood pressure, diabetes, or take exogenous hormones: Cholesterol lowering medication	193148	168901	24247	both_sexes	UKBB	6153_1.gwas.imputed_v3.both_sexes.tsv.bgz	148
6153_100	Medication for cholesterol, blood pressure, diabetes, or take exogenous hormones: None of the above	193148	59810	133338	both_sexes	UKBB	6153_100.gwas.imputed_v3.both_sexes.tsv.bgz	88
6153_2	Medication for cholesterol, blood pressure, diabetes, or take exogenous hormones: Blood pressure medication	193148	159629	33519	both_sexes	UKBB	6153_2.gwas.imputed_v3.both_sexes.tsv.bgz	336
6153_3	Medication for cholesterol, blood pressure, diabetes, or take exogenous hormones: Insulin	193148	191672	1476	both_sexes	UKBB	6153_3.gwas.imputed_v3.both_sexes.tsv.bgz	76
6153_4	Medication for cholesterol, blood pressure, diabetes, or take exogenous hormones: Hormone replacement therapy	193148	178763	14385	both_sexes	UKBB	6153_4.gwas.imputed_v3.both_sexes.tsv.bgz	0
6154_1	Medication for pain relief, constipation, heartburn: Aspirin	357084	306880	50204	both_sexes	UKBB	6154_1.gwas.imputed_v3.both_sexes.tsv.bgz	4
6154_100	Medication for pain relief, constipation, heartburn: None of the above	357084	159041	198043	both_sexes	UKBB	6154_100.gwas.imputed_v3.both_sexes.tsv.bgz	204
6154_2	Medication for pain relief, constipation, heartburn: Ibuprofen (e.g. Nurofen)	357084	304035	53049	both_sexes	UKBB	6154_2.gwas.imputed_v3.both_sexes.tsv.bgz	0
6154_3	Medication for pain relief, constipation, heartburn: Paracetamol	357084	279148	77936	both_sexes	UKBB	6154_3.gwas.imputed_v3.both_sexes.tsv.bgz	36
6154_4	Medication for pain relief, constipation, heartburn: Ranitidine (e.g. Zantac)	357084	350258	6826	both_sexes	UKBB	6154_4.gwas.imputed_v3.both_sexes.tsv.bgz	0
6154_5	Medication for pain relief, constipation, heartburn: Omeprazole (e.g. Zanprol)	357084	335620	21464	both_sexes	UKBB	6154_5.gwas.imputed_v3.both_sexes.tsv.bgz	0
6155_100	Vitamin and mineral supplements: None of the above	359245	112464	246781	both_sexes	UKBB	6155_100.gwas.imputed_v3.both_sexes.tsv.bgz	56
6155_6	Vitamin and mineral supplements: Folic acid or Folate (Vit B9)	359245	351642	7603	both_sexes	UKBB	6155_6.gwas.imputed_v3.both_sexes.tsv.bgz	2
6155_7	Vitamin and mineral supplements: Multivitamins +/- minerals	359245	281773	77472	both_sexes	UKBB	6155_7.gwas.imputed_v3.both_sexes.tsv.bgz	0
6157_2	Why stopped smoking: Doctor's advice	88516	82160	6356	both_sexes	UKBB	6157_2.gwas.imputed_v3.both_sexes.tsv.bgz	0
6157_3	Why stopped smoking: Health precaution	88516	32853	55663	both_sexes	UKBB	6157_3.gwas.imputed_v3.both_sexes.tsv.bgz	6
6158_2	Why reduced smoking: Doctor's advice	11443	9804	1639	both_sexes	UKBB	6158_2.gwas.imputed_v3.both_sexes.tsv.bgz	0
6158_3	Why reduced smoking: Health precaution	11443	6000	5443	both_sexes	UKBB	6158_3.gwas.imputed_v3.both_sexes.tsv.bgz	0
6159_1	Pain type(s) experienced in last month: Headache	360391	288719	71672	both_sexes	UKBB	6159_1.gwas.imputed_v3.both_sexes.tsv.bgz	116
6159_100	Pain type(s) experienced in last month: None of the above	360391	214877	145514	both_sexes	UKBB	6159_100.gwas.imputed_v3.both_sexes.tsv.bgz	8
6159_3	Pain type(s) experienced in last month: Neck or shoulder pain	360391	278271	82120	both_sexes	UKBB	6159_3.gwas.imputed_v3.both_sexes.tsv.bgz	2
6159_4	Pain type(s) experienced in last month: Back pain	360391	269042	91349	both_sexes	UKBB	6159_4.gwas.imputed_v3.both_sexes.tsv.bgz	8
6159_6	Pain type(s) experienced in last month: Hip pain	360391	319891	40500	both_sexes	UKBB	6159_6.gwas.imputed_v3.both_sexes.tsv.bgz	68
6159_7	Pain type(s) experienced in last month: Knee pain	360391	283763	76628	both_sexes	UKBB	6159_7.gwas.imputed_v3.both_sexes.tsv.bgz	46
6159_8	Pain type(s) experienced in last month: Pain all over the body	360391	354861	5530	both_sexes	UKBB	6159_8.gwas.imputed_v3.both_sexes.tsv.bgz	0
6160_1	Leisure/social activities: Sports club or gym	360063	251590	108473	both_sexes	UKBB	6160_1.gwas.imputed_v3.both_sexes.tsv.bgz	2
6160_100	Leisure/social activities: None of the above	360063	251359	108704	both_sexes	UKBB	6160_100.gwas.imputed_v3.both_sexes.tsv.bgz	16
6160_2	Leisure/social activities: Pub or social club	360063	261564	98499	both_sexes	UKBB	6160_2.gwas.imputed_v3.both_sexes.tsv.bgz	2
6160_3	Leisure/social activities: Religious group	360063	307366	52697	both_sexes	UKBB	6160_3.gwas.imputed_v3.both_sexes.tsv.bgz	10
6160_4	Leisure/social activities: Adult education class	360063	334221	25842	both_sexes	UKBB	6160_4.gwas.imputed_v3.both_sexes.tsv.bgz	2
6160_5	Leisure/social activities: Other group activity	360063	279885	80178	both_sexes	UKBB	6160_5.gwas.imputed_v3.both_sexes.tsv.bgz	20
6162_1	Types of transport used (excluding work): Car/motor vehicle	359324	73865	285459	both_sexes	UKBB	6162_1.gwas.imputed_v3.both_sexes.tsv.bgz	0
6162_2	Types of transport used (excluding work): Walk	359324	182390	176934	both_sexes	UKBB	6162_2.gwas.imputed_v3.both_sexes.tsv.bgz	16
6162_3	Types of transport used (excluding work): Public transport	359324	251597	107727	both_sexes	UKBB	6162_3.gwas.imputed_v3.both_sexes.tsv.bgz	2
6162_4	Types of transport used (excluding work): Cycle	359324	333265	26059	both_sexes	UKBB	6162_4.gwas.imputed_v3.both_sexes.tsv.bgz	18
6164_1	Types of physical activity in last 4 weeks: Walking for pleasure (not as a means of transport)	359263	100689	258574	both_sexes	UKBB	6164_1.gwas.imputed_v3.both_sexes.tsv.bgz	44
6164_100	Types of physical activity in last 4 weeks: None of the above	359263	338008	21255	both_sexes	UKBB	6164_100.gwas.imputed_v3.both_sexes.tsv.bgz	2
6164_2	Types of physical activity in last 4 weeks: Other exercises (eg: swimming, cycling, keep fit, bowling)	359263	185021	174242	both_sexes	UKBB	6164_2.gwas.imputed_v3.both_sexes.tsv.bgz	6
6164_3	Types of physical activity in last 4 weeks: Strenuous sports	359263	321966	37297	both_sexes	UKBB	6164_3.gwas.imputed_v3.both_sexes.tsv.bgz	2
6164_4	Types of physical activity in last 4 weeks: Light DIY (eg: pruning, watering the lawn)	359263	172584	186679	both_sexes	UKBB	6164_4.gwas.imputed_v3.both_sexes.tsv.bgz	80
6164_5	Types of physical activity in last 4 weeks: Heavy DIY (eg: weeding, lawn mowing, carpentry, digging)	359263	202666	156597	both_sexes	UKBB	6164_5.gwas.imputed_v3.both_sexes.tsv.bgz	2
6177_1	Medication for cholesterol, blood pressure or diabetes: Cholesterol lowering medication	165340	127283	38057	both_sexes	UKBB	6177_1.gwas.imputed_v3.both_sexes.tsv.bgz	170
6177_100	Medication for cholesterol, blood pressure or diabetes: None of the above	165340	54968	110372	both_sexes	UKBB	6177_100.gwas.imputed_v3.both_sexes.tsv.bgz	144
6177_2	Medication for cholesterol, blood pressure or diabetes: Blood pressure medication	165340	124353	40987	both_sexes	UKBB	6177_2.gwas.imputed_v3.both_sexes.tsv.bgz	150
6177_3	Medication for cholesterol, blood pressure or diabetes: Insulin	165340	163092	2248	both_sexes	UKBB	6177_3.gwas.imputed_v3.both_sexes.tsv.bgz	62
6179_1	Mineral and other dietary supplements: Fish oil (including cod liver oil)	360016	245885	114131	both_sexes	UKBB	6179_1.gwas.imputed_v3.both_sexes.tsv.bgz	4
6179_100	Mineral and other dietary supplements: None of the above	360016	155206	204810	both_sexes	UKBB	6179_100.gwas.imputed_v3.both_sexes.tsv.bgz	76
6179_2	Mineral and other dietary supplements: Glucosamine	360016	289798	70218	both_sexes	UKBB	6179_2.gwas.imputed_v3.both_sexes.tsv.bgz	0
6179_3	Mineral and other dietary supplements: Calcium	360016	335990	24026	both_sexes	UKBB	6179_3.gwas.imputed_v3.both_sexes.tsv.bgz	64
6179_4	Mineral and other dietary supplements: Zinc	360016	345614	14402	both_sexes	UKBB	6179_4.gwas.imputed_v3.both_sexes.tsv.bgz	0
670_1	Type of accommodation lived in: A house or bungalow	360088	33234	326854	both_sexes	UKBB	670_1.gwas.imputed_v3.both_sexes.tsv.bgz	0
670_2	Type of accommodation lived in: A flat, maisonette or apartment	360088	328237	31851	both_sexes	UKBB	670_2.gwas.imputed_v3.both_sexes.tsv.bgz	0
680_1	Own or rent accommodation lived in: Own outright (by you or someone in your household)	356340	162982	193358	both_sexes	UKBB	680_1.gwas.imputed_v3.both_sexes.tsv.bgz	2
680_3	Own or rent accommodation lived in: Rent - from local authority, local council, housing association	356340	337372	18968	both_sexes	UKBB	680_3.gwas.imputed_v3.both_sexes.tsv.bgz	2
699_irnt	Length of time at current address	352690	NA	NA	both_sexes	UKBB	699_irnt.gwas.imputed_v3.both_sexes.tsv.bgz	14
709	Number in household	358963	NA	NA	both_sexes	UKBB	709.gwas.imputed_v3.both_sexes.tsv.bgz	0
728	Number of vehicles in household	358754	NA	NA	both_sexes	UKBB	728.gwas.imputed_v3.both_sexes.tsv.bgz	4
738	Average total household income before tax	311028	NA	NA	both_sexes	UKBB	738.gwas.imputed_v3.both_sexes.tsv.bgz	84
767_irnt	Length of working week for main job	202304	NA	NA	both_sexes	UKBB	767_irnt.gwas.imputed_v3.both_sexes.tsv.bgz	0
78_irnt	Heel bone mineral density (BMD) T-score, automated	206589	NA	NA	both_sexes	UKBB	78_irnt.gwas.imputed_v3.both_sexes.tsv.bgz	806
806	Job involves mainly walking or standing	204956	NA	NA	both_sexes	UKBB	806.gwas.imputed_v3.both_sexes.tsv.bgz	11
816	Job involves heavy manual or physical work	205000	NA	NA	both_sexes	UKBB	816.gwas.imputed_v3.both_sexes.tsv.bgz	2
826	Job involves shift work	204783	NA	NA	both_sexes	UKBB	826.gwas.imputed_v3.both_sexes.tsv.bgz	0
845	Age completed full time education	240547	NA	NA	both_sexes	UKBB	845.gwas.imputed_v3.both_sexes.tsv.bgz	127
864	Number of days/week walked 10+ minutes	355030	NA	NA	both_sexes	UKBB	864.gwas.imputed_v3.both_sexes.tsv.bgz	0
874_irnt	Duration of walks	308989	NA	NA	both_sexes	UKBB	874_irnt.gwas.imputed_v3.both_sexes.tsv.bgz	0
884	Number of days/week of moderate physical activity 10+ minutes	343943	NA	NA	both_sexes	UKBB	884.gwas.imputed_v3.both_sexes.tsv.bgz	32
894	Duration of moderate activity	268826	NA	NA	both_sexes	UKBB	894.gwas.imputed_v3.both_sexes.tsv.bgz	0
904	Number of days/week of vigorous physical activity 10+ minutes	344084	NA	NA	both_sexes	UKBB	904.gwas.imputed_v3.both_sexes.tsv.bgz	41
914_irnt	Duration of vigorous activity	196758	NA	NA	both_sexes	UKBB	914_irnt.gwas.imputed_v3.both_sexes.tsv.bgz	0
924	Usual walking pace	358974	NA	NA	both_sexes	UKBB	924.gwas.imputed_v3.both_sexes.tsv.bgz	72
93_irnt	Systolic blood pressure, manual reading	31281	NA	NA	both_sexes	UKBB	93_irnt.gwas.imputed_v3.both_sexes.tsv.bgz	6
943	Frequency of stair climbing in last 4 weeks	357720	NA	NA	both_sexes	UKBB	943.gwas.imputed_v3.both_sexes.tsv.bgz	13
971	Frequency of walking for pleasure in last 4 weeks	257478	NA	NA	both_sexes	UKBB	971.gwas.imputed_v3.both_sexes.tsv.bgz	0
981	Duration walking for pleasure	257330	NA	NA	both_sexes	UKBB	981.gwas.imputed_v3.both_sexes.tsv.bgz	14
A41	Diagnoses - main ICD10: A41 Other septicaemia	361194	360098	1096	both_sexes	UKBB	A41.gwas.imputed_v3.both_sexes.tsv.bgz	0
AB1_INTESTINAL_INFECTIONS	Intestinal infectious diseases	361194	356890	4304	both_sexes	UKBB	AB1_INTESTINAL_INFECTIONS.gwas.imputed_v3.both_sexes.tsv.bgz	0
ASTHMA_CHILD	Childhood asthma (age<16)	361194	359201	1993	both_sexes	UKBB	ASTHMA_CHILD.gwas.imputed_v3.both_sexes.tsv.bgz	0
ASTHMA_EOSINOPHIL_SUGG	Suggestive for eosinophilic asthma	361194	358892	2302	both_sexes	UKBB	ASTHMA_EOSINOPHIL_SUGG.gwas.imputed_v3.both_sexes.tsv.bgz	70
ASTHMA_HOSPITAL1	Asthma, hospital admissions 1	361194	359208	1986	both_sexes	UKBB	ASTHMA_HOSPITAL1.gwas.imputed_v3.both_sexes.tsv.bgz	0
ASTHMA_MEDICATIO_COMORB	Medication related adverse effects	361194	341100	20094	both_sexes	UKBB	ASTHMA_MEDICATIO_COMORB.gwas.imputed_v3.both_sexes.tsv.bgz	116
BRONCHITIS	Bronchitis	361194	356911	4283	both_sexes	UKBB	BRONCHITIS.gwas.imputed_v3.both_sexes.tsv.bgz	0
C18	Diagnoses - main ICD10: C18 Malignant neoplasm of colon	361194	358968	2226	both_sexes	UKBB	C18.gwas.imputed_v3.both_sexes.tsv.bgz	0
C20	Diagnoses - main ICD10: C20 Malignant neoplasm of rectum	361194	360076	1118	both_sexes	UKBB	C20.gwas.imputed_v3.both_sexes.tsv.bgz	0
C34	Diagnoses - main ICD10: C34 Malignant neoplasm of bronchus and lung	361194	359767	1427	both_sexes	UKBB	C34.gwas.imputed_v3.both_sexes.tsv.bgz	0
C3_BREAST_3	Malignant neoplasm of breast	361194	351473	9721	both_sexes	UKBB	C3_BREAST_3.gwas.imputed_v3.both_sexes.tsv.bgz	2
C3_BRONCHUS_LUNG	Malignant neoplasm of bronchus and lung	361194	359513	1681	both_sexes	UKBB	C3_BRONCHUS_LUNG.gwas.imputed_v3.both_sexes.tsv.bgz	0
C3_COLON	Malignant neoplasm of colon	361194	358757	2437	both_sexes	UKBB	C3_COLON.gwas.imputed_v3.both_sexes.tsv.bgz	0
C3_DIGESTIVE_ORGANS	Malignant neoplasm of digestive organs	361194	355504	5690	both_sexes	UKBB	C3_DIGESTIVE_ORGANS.gwas.imputed_v3.both_sexes.tsv.bgz	0
C3_MALE_GENITAL	malignant neoplasm of male genital organs	361194	354399	6795	both_sexes	UKBB	C3_MALE_GENITAL.gwas.imputed_v3.both_sexes.tsv.bgz	48
C3_MELANOMA_SKIN	Malignant melanoma of skin	361194	358660	2534	both_sexes	UKBB	C3_MELANOMA_SKIN.gwas.imputed_v3.both_sexes.tsv.bgz	10
C3_OTHER_SKIN	Other malignant neoplasms of skin	361194	346792	14402	both_sexes	UKBB	C3_OTHER_SKIN.gwas.imputed_v3.both_sexes.tsv.bgz	150
C3_PRIMARY_LYMPHOID_HEMATOPOIETIC	Primary_lymphoid and hematopoietic malignant neoplasms	361194	358484	2710	both_sexes	UKBB	C3_PRIMARY_LYMPHOID_HEMATOPOIETIC.gwas.imputed_v3.both_sexes.tsv.bgz	6
C3_PROSTATE	Malignant neoplasm of prostate	361194	354873	6321	both_sexes	UKBB	C3_PROSTATE.gwas.imputed_v3.both_sexes.tsv.bgz	54
C3_RESPIRATORY_INTRATHORACIC	Malignant neoplasm of respiratory system and intrathoracic organs	361194	359250	1944	both_sexes	UKBB	C3_RESPIRATORY_INTRATHORACIC.gwas.imputed_v3.both_sexes.tsv.bgz	0
C3_SKIN	Malignant neoplasm of skin	361194	344663	16531	both_sexes	UKBB	C3_SKIN.gwas.imputed_v3.both_sexes.tsv.bgz	240
C43	Diagnoses - main ICD10: C43 Malignant melanoma of skin	361194	359522	1672	both_sexes	UKBB	C43.gwas.imputed_v3.both_sexes.tsv.bgz	4
C44	Diagnoses - main ICD10: C44 Other malignant neoplasms of skin	361194	352108	9086	both_sexes	UKBB	C44.gwas.imputed_v3.both_sexes.tsv.bgz	56
C50	Diagnoses - main ICD10: C50 Malignant neoplasm of breast	361194	352890	8304	both_sexes	UKBB	C50.gwas.imputed_v3.both_sexes.tsv.bgz	0
C61	Diagnoses - main ICD10: C61 Malignant neoplasm of prostate	361194	356852	4342	both_sexes	UKBB	C61.gwas.imputed_v3.both_sexes.tsv.bgz	45
C67	Diagnoses - main ICD10: C67 Malignant neoplasm of bladder	361194	359640	1554	both_sexes	UKBB	C67.gwas.imputed_v3.both_sexes.tsv.bgz	4
C79	Diagnoses - main ICD10: C79 Secondary malignant neoplasm of other sites	361194	360095	1099	both_sexes	UKBB	C79.gwas.imputed_v3.both_sexes.tsv.bgz	0
CARDIAC_ARRHYTM	Cardiac arrhytmias, COPD co-morbidities	361194	352393	8801	both_sexes	UKBB	CARDIAC_ARRHYTM.gwas.imputed_v3.both_sexes.tsv.bgz	24
COLITNONINFNAS	Noninfectious colitis NAS	361194	352249	8945	both_sexes	UKBB	COLITNONINFNAS.gwas.imputed_v3.both_sexes.tsv.bgz	0
COPD_EARLYANDLATER	COPD, early/later onset	361194	359297	1897	both_sexes	UKBB	COPD_EARLYANDLATER.gwas.imputed_v3.both_sexes.tsv.bgz	6
COPD_EXCL	COPD differential diagnosis	361194	334484	26710	both_sexes	UKBB	COPD_EXCL.gwas.imputed_v3.both_sexes.tsv.bgz	0
COX_ARTHROSIS	Coxarthrosis [arthrosis of hip](FG)	361194	351784	9410	both_sexes	UKBB	COX_ARTHROSIS.gwas.imputed_v3.both_sexes.tsv.bgz	20
C_BREAST_3	Malignant neoplasm of breast	361194	351473	9721	both_sexes	UKBB	C_BREAST_3.gwas.imputed_v3.both_sexes.tsv.bgz	2
C_BRONCHUS_LUNG	Malignant neoplasm of bronchus and lung	361194	359513	1681	both_sexes	UKBB	C_BRONCHUS_LUNG.gwas.imputed_v3.both_sexes.tsv.bgz	0
C_COLON	Malignant neoplasm of colon	361194	358757	2437	both_sexes	UKBB	C_COLON.gwas.imputed_v3.both_sexes.tsv.bgz	0
C_DIGESTIVE_ORGANS		361194	355504	5690	both_sexes	UKBB	C_DIGESTIVE_ORGANS.gwas.imputed_v3.both_sexes.tsv.bgz	0
C_LYMPHOMA	Lymphomas	361194	359442	1752	both_sexes	UKBB	C_LYMPHOMA.gwas.imputed_v3.both_sexes.tsv.bgz	0
C_MALE_GENITAL		361194	354399	6795	both_sexes	UKBB	C_MALE_GENITAL.gwas.imputed_v3.both_sexes.tsv.bgz	48
C_MELANOMA_SKIN	Malignant melanoma of skin	361194	358660	2534	both_sexes	UKBB	C_MELANOMA_SKIN.gwas.imputed_v3.both_sexes.tsv.bgz	10
C_OTHER_SKIN	Other malignant neoplasms of skin	361194	346792	14402	both_sexes	UKBB	C_OTHER_SKIN.gwas.imputed_v3.both_sexes.tsv.bgz	150
C_PRIMARY_LYMPHOID_HEMATOPOIETIC		361194	358164	3030	both_sexes	UKBB	C_PRIMARY_LYMPHOID_HEMATOPOIETIC.gwas.imputed_v3.both_sexes.tsv.bgz	10
C_PROSTATE	Malignant neoplasm of prostate	361194	354873	6321	both_sexes	UKBB	C_PROSTATE.gwas.imputed_v3.both_sexes.tsv.bgz	54
C_RESPIRATORY_INTRATHORACIC		361194	359250	1944	both_sexes	UKBB	C_RESPIRATORY_INTRATHORACIC.gwas.imputed_v3.both_sexes.tsv.bgz	0
C_SKIN		361194	344663	16531	both_sexes	UKBB	C_SKIN.gwas.imputed_v3.both_sexes.tsv.bgz	240
C_STROKE	STROKE	361194	355048	6146	both_sexes	UKBB	C_STROKE.gwas.imputed_v3.both_sexes.tsv.bgz	0
D05	Diagnoses - main ICD10: D05 Carcinoma in situ of breast	361194	359740	1454	both_sexes	UKBB	D05.gwas.imputed_v3.both_sexes.tsv.bgz	0
D12	Diagnoses - main ICD10: D12 Benign neoplasm of colon, rectum, anus and anal canal	361194	352317	8877	both_sexes	UKBB	D12.gwas.imputed_v3.both_sexes.tsv.bgz	17
D17	Diagnoses - main ICD10: D17 Benign lipomatous neoplasm	361194	356880	4314	both_sexes	UKBB	D17.gwas.imputed_v3.both_sexes.tsv.bgz	21
D22	Diagnoses - main ICD10: D22 Melanocytic naevi	361194	357693	3501	both_sexes	UKBB	D22.gwas.imputed_v3.both_sexes.tsv.bgz	6
D24	Diagnoses - main ICD10: D24 Benign neoplasm of breast	361194	360105	1089	both_sexes	UKBB	D24.gwas.imputed_v3.both_sexes.tsv.bgz	0
D25	Diagnoses - main ICD10: D25 Leiomyoma of uterus	361194	355687	5507	both_sexes	UKBB	D25.gwas.imputed_v3.both_sexes.tsv.bgz	22
D3_ANAEMIANAS	Other and unspecified anaemias	361194	356903	4291	both_sexes	UKBB	D3_ANAEMIANAS.gwas.imputed_v3.both_sexes.tsv.bgz	6
D3_ANAEMIA_IRONDEF	Iron deficiency anaemia	361194	357408	3786	both_sexes	UKBB	D3_ANAEMIA_IRONDEF.gwas.imputed_v3.both_sexes.tsv.bgz	108
D3_OTHERANAEMIA	Other anaemias	361194	356900	4294	both_sexes	UKBB	D3_OTHERANAEMIA.gwas.imputed_v3.both_sexes.tsv.bgz	6
D50	Diagnoses - main ICD10: D50 Iron deficiency anaemia	361194	357972	3222	both_sexes	UKBB	D50.gwas.imputed_v3.both_sexes.tsv.bgz	54
D64	Diagnoses - main ICD10: D64 Other anaemias	361194	357492	3702	both_sexes	UKBB	D64.gwas.imputed_v3.both_sexes.tsv.bgz	3
E04	Diagnoses - main ICD10: E04 Other non-toxic goitre	361194	360142	1052	both_sexes	UKBB	E04.gwas.imputed_v3.both_sexes.tsv.bgz	0
F5_DEPRESSIO	Depression	361194	360049	1145	both_sexes	UKBB	F5_DEPRESSIO.gwas.imputed_v3.both_sexes.tsv.bgz	0
FIBRO_COMORB	Fibromyalgia related co-morbidities	361194	358889	2305	both_sexes	UKBB	FIBRO_COMORB.gwas.imputed_v3.both_sexes.tsv.bgz	0
G56	Diagnoses - main ICD10: G56 Mononeuropathies of upper limb	361194	353064	8130	both_sexes	UKBB	G56.gwas.imputed_v3.both_sexes.tsv.bgz	2
G6_CARPTU	Carpal tunnel syndrome	361194	353221	7973	both_sexes	UKBB	G6_CARPTU.gwas.imputed_v3.both_sexes.tsv.bgz	4
G6_NERPLEX	Nerve, nerve root and plexus disorders	361194	350296	10898	both_sexes	UKBB	G6_NERPLEX.gwas.imputed_v3.both_sexes.tsv.bgz	4
H00	Diagnoses - main ICD10: H00 Hordeolum and chalazion	361194	359727	1467	both_sexes	UKBB	H00.gwas.imputed_v3.both_sexes.tsv.bgz	10
H02	Diagnoses - main ICD10: H02 Other disorders of eyelid	361194	356900	4294	both_sexes	UKBB	H02.gwas.imputed_v3.both_sexes.tsv.bgz	0
H04	Diagnoses - main ICD10: H04 Disorders of lachrymal system	361194	359718	1476	both_sexes	UKBB	H04.gwas.imputed_v3.both_sexes.tsv.bgz	0
H25	Diagnoses - main ICD10: H25 Senile cataract	361194	354862	6332	both_sexes	UKBB	H25.gwas.imputed_v3.both_sexes.tsv.bgz	4
H26	Diagnoses - main ICD10: H26 Other cataract	361194	349888	11306	both_sexes	UKBB	H26.gwas.imputed_v3.both_sexes.tsv.bgz	36
H33	Diagnoses - main ICD10: H33 Retinal detachments and breaks	361194	358523	2671	both_sexes	UKBB	H33.gwas.imputed_v3.both_sexes.tsv.bgz	0
H35	Diagnoses - main ICD10: H35 Other retinal disorders	361194	359643	1551	both_sexes	UKBB	H35.gwas.imputed_v3.both_sexes.tsv.bgz	0
H40	Diagnoses - main ICD10: H40 Glaucoma	361194	359479	1715	both_sexes	UKBB	H40.gwas.imputed_v3.both_sexes.tsv.bgz	0
H7_CHALAZION	Chalazion	361194	359776	1418	both_sexes	UKBB	H7_CHALAZION.gwas.imputed_v3.both_sexes.tsv.bgz	44
H7_EYELIDDIS	Other disorders of eyelid	361194	356665	4529	both_sexes	UKBB	H7_EYELIDDIS.gwas.imputed_v3.both_sexes.tsv.bgz	0
H7_LACRIMALSYSTEM	Disorders of lacrimal system	361194	359639	1555	both_sexes	UKBB	H7_LACRIMALSYSTEM.gwas.imputed_v3.both_sexes.tsv.bgz	0
H7_LENS	Disorders of lens	361194	344118	17076	both_sexes	UKBB	H7_LENS.gwas.imputed_v3.both_sexes.tsv.bgz	116
H7_MACULADEGEN	Degeneration of macula and posterior pole	361194	360181	1013	both_sexes	UKBB	H7_MACULADEGEN.gwas.imputed_v3.both_sexes.tsv.bgz	0
H7_RETINALDETACH	Retinal detachments and breaks	361194	358151	3043	both_sexes	UKBB	H7_RETINALDETACH.gwas.imputed_v3.both_sexes.tsv.bgz	0
H7_RETINALDETACHBREAK	Retinal detachment with retinal break	361194	359996	1198	both_sexes	UKBB	H7_RETINALDETACHBREAK.gwas.imputed_v3.both_sexes.tsv.bgz	0
H7_RETINALDISOTH	Other retinal disorders	361194	359502	1692	both_sexes	UKBB	H7_RETINALDISOTH.gwas.imputed_v3.both_sexes.tsv.bgz	0
HEARTFAIL	Heart failure	361194	359789	1405	both_sexes	UKBB	HEARTFAIL.gwas.imputed_v3.both_sexes.tsv.bgz	0
I20	Diagnoses - main ICD10: I20 Angina pectoris	361194	354948	6246	both_sexes	UKBB	I20.gwas.imputed_v3.both_sexes.tsv.bgz	0
I21	Diagnoses - main ICD10: I21 Acute myocardial infarction	361194	355246	5948	both_sexes	UKBB	I21.gwas.imputed_v3.both_sexes.tsv.bgz	0
I25	Diagnoses - main ICD10: I25 Chronic ischaemic heart disease	361194	348425	12769	both_sexes	UKBB	I25.gwas.imputed_v3.both_sexes.tsv.bgz	82
I26	Diagnoses - main ICD10: I26 Pulmonary embolism	361194	359076	2118	both_sexes	UKBB	I26.gwas.imputed_v3.both_sexes.tsv.bgz	10
I47	Diagnoses - main ICD10: I47 Paroxysmal tachycardia	361194	359509	1685	both_sexes	UKBB	I47.gwas.imputed_v3.both_sexes.tsv.bgz	0
I48	Diagnoses - main ICD10: I48 Atrial fibrillation and flutter	361194	354838	6356	both_sexes	UKBB	I48.gwas.imputed_v3.both_sexes.tsv.bgz	16
I50	Diagnoses - main ICD10: I50 Heart failure	361194	360106	1088	both_sexes	UKBB	I50.gwas.imputed_v3.both_sexes.tsv.bgz	0
I63	Diagnoses - main ICD10: I63 Cerebral infarction	361194	358841	2353	both_sexes	UKBB	I63.gwas.imputed_v3.both_sexes.tsv.bgz	0
I80	Diagnoses - main ICD10: I80 Phlebitis and thrombophlebitis	361194	358905	2289	both_sexes	UKBB	I80.gwas.imputed_v3.both_sexes.tsv.bgz	40
I83	Diagnoses - main ICD10: I83 Varicose veins of lower extremities	361194	352431	8763	both_sexes	UKBB	I83.gwas.imputed_v3.both_sexes.tsv.bgz	68
I84	Diagnoses - main ICD10: I84 Haemorrhoids	361194	349092	12102	both_sexes	UKBB	I84.gwas.imputed_v3.both_sexes.tsv.bgz	1
I9_ARTOTH	Other diseases of arteries and capillaries	361194	360111	1083	both_sexes	UKBB	I9_ARTOTH.gwas.imputed_v3.both_sexes.tsv.bgz	0
I9_CHD	Major coronary heart disease event	361194	351037	10157	both_sexes	UKBB	I9_CHD.gwas.imputed_v3.both_sexes.tsv.bgz	4
I9_CHD_NOREV	Major coronary heart disease event excluding revascularizations	361194	351037	10157	both_sexes	UKBB	I9_CHD_NOREV.gwas.imputed_v3.both_sexes.tsv.bgz	4
I9_CORATHER	Coronary atherosclerosis	361194	346860	14334	both_sexes	UKBB	I9_CORATHER.gwas.imputed_v3.both_sexes.tsv.bgz	174
I9_DISVEINLYMPH	Diseases of veins, lymphatic vessels and lymph nodes, not elsewhere classified	361194	349327	11867	both_sexes	UKBB	I9_DISVEINLYMPH.gwas.imputed_v3.both_sexes.tsv.bgz	120
I9_DVTANDPULM	DVT of lower extremities and pulmonary embolism	361194	356875	4319	both_sexes	UKBB	I9_DVTANDPULM.gwas.imputed_v3.both_sexes.tsv.bgz	98
I9_HEARTFAIL	Heart failure,strict	361194	359789	1405	both_sexes	UKBB	I9_HEARTFAIL.gwas.imputed_v3.both_sexes.tsv.bgz	0
I9_HEARTFAIL_NS	Heart failure, not strict	361194	359789	1405	both_sexes	UKBB	I9_HEARTFAIL_NS.gwas.imputed_v3.both_sexes.tsv.bgz	0
I9_HYPTENS	Hypertension	361194	359957	1237	both_sexes	UKBB	I9_HYPTENS.gwas.imputed_v3.both_sexes.tsv.bgz	0
I9_IHD	Ischaemic heart disease, wide definition	361194	340337	20857	both_sexes	UKBB	I9_IHD.gwas.imputed_v3.both_sexes.tsv.bgz	172
I9_INTRACRA	Nontraumatic intracranial haemmorrhage	361194	359941	1253	both_sexes	UKBB	I9_INTRACRA.gwas.imputed_v3.both_sexes.tsv.bgz	0
I9_MI	Myocardial infarction	361194	354176	7018	both_sexes	UKBB	I9_MI.gwas.imputed_v3.both_sexes.tsv.bgz	34
I9_MI_STRICT	Myocardial infarction, strict	361194	354176	7018	both_sexes	UKBB	I9_MI_STRICT.gwas.imputed_v3.both_sexes.tsv.bgz	34
I9_NONRHEVALV	Non-rheumatic valve diseases	361194	359588	1606	both_sexes	UKBB	I9_NONRHEVALV.gwas.imputed_v3.both_sexes.tsv.bgz	0
I9_PAD	Peripheral artery disease	361194	359964	1230	both_sexes	UKBB	I9_PAD.gwas.imputed_v3.both_sexes.tsv.bgz	0
I9_PHLETHROMBDVTLOW	DVT of lower extremities	361194	359078	2116	both_sexes	UKBB	I9_PHLETHROMBDVTLOW.gwas.imputed_v3.both_sexes.tsv.bgz	82
I9_STR_EXH	Ischaemic Stroke, excluding all haemorrhages	361194	357880	3314	both_sexes	UKBB	I9_STR_EXH.gwas.imputed_v3.both_sexes.tsv.bgz	0
I9_STR_SAH	Stroke, including SAH	361194	356710	4484	both_sexes	UKBB	I9_STR_SAH.gwas.imputed_v3.both_sexes.tsv.bgz	0
I9_UAP	Unstable angina pectoris	361194	357755	3439	both_sexes	UKBB	I9_UAP.gwas.imputed_v3.both_sexes.tsv.bgz	0
I9_VTE	Venous thromboembolism	361194	356574	4620	both_sexes	UKBB	I9_VTE.gwas.imputed_v3.both_sexes.tsv.bgz	88
IBD_ENDOMETRIOSIS	Endometriosis, IBD co-morbidity	361194	359678	1516	both_sexes	UKBB	IBD_ENDOMETRIOSIS.gwas.imputed_v3.both_sexes.tsv.bgz	0
ICDMAIN_ANY_ENTRY	Any ICDMAIN event in hilmo or causes of death	361194	79185	282009	both_sexes	UKBB	ICDMAIN_ANY_ENTRY.gwas.imputed_v3.both_sexes.tsv.bgz	124
III_BLOOD_IMMUN	Diseases of the blood and blood-forming organs and certain disorders involving the immune mechanism	361194	351099	10095	both_sexes	UKBB	III_BLOOD_IMMUN.gwas.imputed_v3.both_sexes.tsv.bgz	12
II_NEOPLASM	Neoplasms	361194	291016	70178	both_sexes	UKBB	II_NEOPLASM.gwas.imputed_v3.both_sexes.tsv.bgz	86
ILD_DIFF_DG	ILD differential diagnosis	361194	334484	26710	both_sexes	UKBB	ILD_DIFF_DG.gwas.imputed_v3.both_sexes.tsv.bgz	0
IV_ENDOCRIN_NUTRIT	Endocrine, nutritional and metabolic diseases	361194	353976	7218	both_sexes	UKBB	IV_ENDOCRIN_NUTRIT.gwas.imputed_v3.both_sexes.tsv.bgz	44
IX_CIRCULATORY	Diseases of the circulatory system	361194	300690	60504	both_sexes	UKBB	IX_CIRCULATORY.gwas.imputed_v3.both_sexes.tsv.bgz	94
J10_ASTHMA	Asthma	361194	359201	1993	both_sexes	UKBB	J10_ASTHMA.gwas.imputed_v3.both_sexes.tsv.bgz	0
J10_ASTHMA_MAIN	Asthma	361194	359201	1993	both_sexes	UKBB	J10_ASTHMA_MAIN.gwas.imputed_v3.both_sexes.tsv.bgz	0
J33	Diagnoses - main ICD10: J33 Nasal polyp	361194	358987	2207	both_sexes	UKBB	J33.gwas.imputed_v3.both_sexes.tsv.bgz	36
J38	Diagnoses - main ICD10: J38 Diseases of vocal cords and larynx, not elsewhere classified	361194	360026	1168	both_sexes	UKBB	J38.gwas.imputed_v3.both_sexes.tsv.bgz	0
J44	Diagnoses - main ICD10: J44 Other chronic obstructive pulmonary disease	361194	359663	1531	both_sexes	UKBB	J44.gwas.imputed_v3.both_sexes.tsv.bgz	3
J45	Diagnoses - main ICD10: J45 Asthma	361194	359501	1693	both_sexes	UKBB	J45.gwas.imputed_v3.both_sexes.tsv.bgz	0
K01	Diagnoses - main ICD10: K01 Embedded and impacted teeth	361194	359751	1443	both_sexes	UKBB	K01.gwas.imputed_v3.both_sexes.tsv.bgz	0
K02	Diagnoses - main ICD10: K02 Dental caries	361194	359084	2110	both_sexes	UKBB	K02.gwas.imputed_v3.both_sexes.tsv.bgz	0
K04	Diagnoses - main ICD10: K04 Diseases of pulp and periapical tissues	361194	359585	1609	both_sexes	UKBB	K04.gwas.imputed_v3.both_sexes.tsv.bgz	0
K08	Diagnoses - main ICD10: K08 Other disorders of teeth and supporting structures	361194	359356	1838	both_sexes	UKBB	K08.gwas.imputed_v3.both_sexes.tsv.bgz	0
K11_APPENDIX	Diseases of appendix	361194	358241	2953	both_sexes	UKBB	K11_APPENDIX.gwas.imputed_v3.both_sexes.tsv.bgz	70
K11_GALLBILPANC	Disorders of gallbladder, biliary tract and pancreas	361194	347272	13922	both_sexes	UKBB	K11_GALLBILPANC.gwas.imputed_v3.both_sexes.tsv.bgz	96
K11_HERNIA	Hernia	361194	334997	26197	both_sexes	UKBB	K11_HERNIA.gwas.imputed_v3.both_sexes.tsv.bgz	122
K11_ILEUS	Paralytic ileus and intestinal obstruction	361194	359092	2102	both_sexes	UKBB	K11_ILEUS.gwas.imputed_v3.both_sexes.tsv.bgz	0
K11_LIVER	Diseases of liver	361194	359531	1663	both_sexes	UKBB	K11_LIVER.gwas.imputed_v3.both_sexes.tsv.bgz	0
K11_OTHDIG	Other diseases of the digestive system	361194	354131	7063	both_sexes	UKBB	K11_OTHDIG.gwas.imputed_v3.both_sexes.tsv.bgz	26
K11_OTHDISOES	Other diseases of oesophagus	361194	360009	1185	both_sexes	UKBB	K11_OTHDISOES.gwas.imputed_v3.both_sexes.tsv.bgz	0
K11_OTHILEUS	Other or unspecified ileus, impaction or obstruction	361194	359844	1350	both_sexes	UKBB	K11_OTHILEUS.gwas.imputed_v3.both_sexes.tsv.bgz	0
K26	Diagnoses - main ICD10: K26 Duodenal ulcer	361194	359903	1291	both_sexes	UKBB	K26.gwas.imputed_v3.both_sexes.tsv.bgz	1
K31	Diagnoses - main ICD10: K31 Other diseases of stomach and duodenum	361194	358820	2374	both_sexes	UKBB	K31.gwas.imputed_v3.both_sexes.tsv.bgz	0
K35	Diagnoses - main ICD10: K35 Acute appendicitis	361194	358790	2404	both_sexes	UKBB	K35.gwas.imputed_v3.both_sexes.tsv.bgz	0
K40	Diagnoses - main ICD10: K40 Inguinal hernia	361194	348047	13147	both_sexes	UKBB	K40.gwas.imputed_v3.both_sexes.tsv.bgz	27
K42	Diagnoses - main ICD10: K42 Umbilical hernia	361194	358666	2528	both_sexes	UKBB	K42.gwas.imputed_v3.both_sexes.tsv.bgz	0
K43	Diagnoses - main ICD10: K43 Ventral hernia	361194	358945	2249	both_sexes	UKBB	K43.gwas.imputed_v3.both_sexes.tsv.bgz	0
K51	Diagnoses - main ICD10: K51 Ulcerative colitis	361194	359051	2143	both_sexes	UKBB	K51.gwas.imputed_v3.both_sexes.tsv.bgz	4
K57	Diagnoses - main ICD10: K57 Diverticular disease of intestine	361194	348532	12662	both_sexes	UKBB	K57.gwas.imputed_v3.both_sexes.tsv.bgz	24
K61	Diagnoses - main ICD10: K61 Abscess of anal and rectal regions	361194	360141	1053	both_sexes	UKBB	K61.gwas.imputed_v3.both_sexes.tsv.bgz	0
K63	Diagnoses - main ICD10: K63 Other diseases of intestine	361194	353153	8041	both_sexes	UKBB	K63.gwas.imputed_v3.both_sexes.tsv.bgz	0
K80	Diagnoses - main ICD10: K80 Cholelithiasis	361194	350674	10520	both_sexes	UKBB	K80.gwas.imputed_v3.both_sexes.tsv.bgz	51
K81	Diagnoses - main ICD10: K81 Cholecystitis	361194	359264	1930	both_sexes	UKBB	K81.gwas.imputed_v3.both_sexes.tsv.bgz	1
K85	Diagnoses - main ICD10: K85 Acute pancreatitis	361194	359902	1292	both_sexes	UKBB	K85.gwas.imputed_v3.both_sexes.tsv.bgz	0
KNEE_ARTHROSIS	Gonarthrosis [arthrosis of knee](FG)	361194	349294	11900	both_sexes	UKBB	KNEE_ARTHROSIS.gwas.imputed_v3.both_sexes.tsv.bgz	0
KRA_PSY_ANYMENTAL	Any mental disorder	361194	356890	4304	both_sexes	UKBB	KRA_PSY_ANYMENTAL.gwas.imputed_v3.both_sexes.tsv.bgz	0
L02	Diagnoses - main ICD10: L02 Cutaneous abscess, furuncle and carbuncle	361194	359497	1697	both_sexes	UKBB	L02.gwas.imputed_v3.both_sexes.tsv.bgz	0
L03	Diagnoses - main ICD10: L03 Cellulitis	361194	356947	4247	both_sexes	UKBB	L03.gwas.imputed_v3.both_sexes.tsv.bgz	1
L12_ACTINKERA	Actinic keratosis	361194	359845	1349	both_sexes	UKBB	L12_ACTINKERA.gwas.imputed_v3.both_sexes.tsv.bgz	2
L12_NONIONRADISKIN	Skin changes due to chronic exposure to nonionizing radiation	361194	359693	1501	both_sexes	UKBB	L12_NONIONRADISKIN.gwas.imputed_v3.both_sexes.tsv.bgz	2
L12_SCARCONDITIONS	Scar conditions and fibrosis of skin	361194	359718	1476	both_sexes	UKBB	L12_SCARCONDITIONS.gwas.imputed_v3.both_sexes.tsv.bgz	0
L57	Diagnoses - main ICD10: L57 Skin changes due to chronic exposure to nonionising radiation	361194	359747	1447	both_sexes	UKBB	L57.gwas.imputed_v3.both_sexes.tsv.bgz	1
L72	Diagnoses - main ICD10: L72 Follicular cysts of skin and subcutaneous tissue	361194	354550	6644	both_sexes	UKBB	L72.gwas.imputed_v3.both_sexes.tsv.bgz	20
L82	Diagnoses - main ICD10: L82 Seborrhoeic keratosis	361194	359163	2031	both_sexes	UKBB	L82.gwas.imputed_v3.both_sexes.tsv.bgz	0
LUNG_CANCER	Lung cancer and mesothelioma	361194	359187	2007	both_sexes	UKBB	LUNG_CANCER.gwas.imputed_v3.both_sexes.tsv.bgz	4
LUNG_CANCER_MESOT	Lung cancer and mesothelioma	361194	359187	2007	both_sexes	UKBB	LUNG_CANCER_MESOT.gwas.imputed_v3.both_sexes.tsv.bgz	4
M06	Diagnoses - main ICD10: M06 Other rheumatoid arthritis	361194	359793	1401	both_sexes	UKBB	M06.gwas.imputed_v3.both_sexes.tsv.bgz	18
M13_ADHCAPSULITIS	Adhesive capsulitis of shoulder	361194	359996	1198	both_sexes	UKBB	M13_ADHCAPSULITIS.gwas.imputed_v3.both_sexes.tsv.bgz	0
M13_ARTHROSIS	#Arthrosis	361194	336217	24977	both_sexes	UKBB	M13_ARTHROSIS.gwas.imputed_v3.both_sexes.tsv.bgz	6
M13_CERVICALGIA	Cervicalgia	361194	360145	1049	both_sexes	UKBB	M13_CERVICALGIA.gwas.imputed_v3.both_sexes.tsv.bgz	0
M13_DORSALGIA	Dorsalgia	361194	352395	8799	both_sexes	UKBB	M13_DORSALGIA.gwas.imputed_v3.both_sexes.tsv.bgz	0
M13_DUPUTRYEN	Palmar fascial fibromatosis [Dupuytren]	361194	358246	2948	both_sexes	UKBB	M13_DUPUTRYEN.gwas.imputed_v3.both_sexes.tsv.bgz	78
M13_FIBROBLASTIC	Fibroblastic disorders	361194	358004	3190	both_sexes	UKBB	M13_FIBROBLASTIC.gwas.imputed_v3.both_sexes.tsv.bgz	84
M13_GANGLION	Ganglion	361194	358955	2239	both_sexes	UKBB	M13_GANGLION.gwas.imputed_v3.both_sexes.tsv.bgz	0
M13_HALLUXRIGIDUS	Hallux rigidus	361194	360064	1130	both_sexes	UKBB	M13_HALLUXRIGIDUS.gwas.imputed_v3.both_sexes.tsv.bgz	0
M13_HALLUXVALGUS	Hallux valgus (acquired)	361194	355824	5370	both_sexes	UKBB	M13_HALLUXVALGUS.gwas.imputed_v3.both_sexes.tsv.bgz	0
M13_LIMBPAIN	Pain in limb	361194	357520	3674	both_sexes	UKBB	M13_LIMBPAIN.gwas.imputed_v3.both_sexes.tsv.bgz	0
M13_MENISCUSDERANGEMENTS	Meniscus derangement	361194	350363	10831	both_sexes	UKBB	M13_MENISCUSDERANGEMENTS.gwas.imputed_v3.both_sexes.tsv.bgz	0
M13_OTHERJOINT	#Other joint disorders	361194	333847	27347	both_sexes	UKBB	M13_OTHERJOINT.gwas.imputed_v3.both_sexes.tsv.bgz	0
M13_POLYARTHROPATHIES	#Polyarthropathies	361194	357919	3275	both_sexes	UKBB	M13_POLYARTHROPATHIES.gwas.imputed_v3.both_sexes.tsv.bgz	4
M13_RHEUMA	Rheumatoid arthritis	361194	359589	1605	both_sexes	UKBB	M13_RHEUMA.gwas.imputed_v3.both_sexes.tsv.bgz	28
M13_SCIATICA	Siatica+with lumbago	361194	360041	1153	both_sexes	UKBB	M13_SCIATICA.gwas.imputed_v3.both_sexes.tsv.bgz	0
M13_SOFTOVERUSE	Soft tissue disorders related to use, overuse and pressure	361194	360062	1132	both_sexes	UKBB	M13_SOFTOVERUSE.gwas.imputed_v3.both_sexes.tsv.bgz	18
M13_SOFTTISSUENAS	Other specified/unspecified soft tissue disorders	361194	358264	2930	both_sexes	UKBB	M13_SOFTTISSUENAS.gwas.imputed_v3.both_sexes.tsv.bgz	0
M13_SOFTTISSUEOTH	Other soft tissue disorders, not elsewhere classified	361194	353961	7233	both_sexes	UKBB	M13_SOFTTISSUEOTH.gwas.imputed_v3.both_sexes.tsv.bgz	0
M13_SPONDYLOPATHY	#Spondylopathies	361194	356801	4393	both_sexes	UKBB	M13_SPONDYLOPATHY.gwas.imputed_v3.both_sexes.tsv.bgz	0
M13_TRIGGERFINGER	Trigger finger	361194	359195	1999	both_sexes	UKBB	M13_TRIGGERFINGER.gwas.imputed_v3.both_sexes.tsv.bgz	0
M15	Diagnoses - main ICD10: M15 Polyarthrosis	361194	359930	1264	both_sexes	UKBB	M15.gwas.imputed_v3.both_sexes.tsv.bgz	0
M16	Diagnoses - main ICD10: M16 Coxarthrosis [arthrosis of hip]	361194	352058	9136	both_sexes	UKBB	M16.gwas.imputed_v3.both_sexes.tsv.bgz	10
M17	Diagnoses - main ICD10: M17 Gonarthrosis [arthrosis of knee]	361194	349697	11497	both_sexes	UKBB	M17.gwas.imputed_v3.both_sexes.tsv.bgz	0
M19	Diagnoses - main ICD10: M19 Other arthrosis	361194	357029	4165	both_sexes	UKBB	M19.gwas.imputed_v3.both_sexes.tsv.bgz	0
M20	Diagnoses - main ICD10: M20 Acquired deformities of fingers and toes	361194	353421	7773	both_sexes	UKBB	M20.gwas.imputed_v3.both_sexes.tsv.bgz	0
M23	Diagnoses - main ICD10: M23 Internal derangement of knee	361194	349363	11831	both_sexes	UKBB	M23.gwas.imputed_v3.both_sexes.tsv.bgz	0
M47	Diagnoses - main ICD10: M47 Spondylosis	361194	359190	2004	both_sexes	UKBB	M47.gwas.imputed_v3.both_sexes.tsv.bgz	0
M48	Diagnoses - main ICD10: M48 Other spondylopathies	361194	359304	1890	both_sexes	UKBB	M48.gwas.imputed_v3.both_sexes.tsv.bgz	0
M54	Diagnoses - main ICD10: M54 Dorsalgia	361194	352833	8361	both_sexes	UKBB	M54.gwas.imputed_v3.both_sexes.tsv.bgz	0
M65	Diagnoses - main ICD10: M65 Synovitis and tenosynovitis	361194	358382	2812	both_sexes	UKBB	M65.gwas.imputed_v3.both_sexes.tsv.bgz	0
M70	Diagnoses - main ICD10: M70 Soft tissue disorders related to use, overuse and pressure	361194	360115	1079	both_sexes	UKBB	M70.gwas.imputed_v3.both_sexes.tsv.bgz	9
M72	Diagnoses - main ICD10: M72 Fibroblastic disorders	361194	358001	3193	both_sexes	UKBB	M72.gwas.imputed_v3.both_sexes.tsv.bgz	41
M79	Diagnoses - main ICD10: M79 Other soft tissue disorders, not elsewhere classified	361194	354248	6946	both_sexes	UKBB	M79.gwas.imputed_v3.both_sexes.tsv.bgz	0
M84	Diagnoses - main ICD10: M84 Disorders of continuity of bone	361194	360129	1065	both_sexes	UKBB	M84.gwas.imputed_v3.both_sexes.tsv.bgz	0
N13	Diagnoses - main ICD10: N13 Obstructive and reflux uropathy	361194	359835	1359	both_sexes	UKBB	N13.gwas.imputed_v3.both_sexes.tsv.bgz	0
N20	Diagnoses - main ICD10: N20 Calculus of kidney and ureter	361194	357654	3540	both_sexes	UKBB	N20.gwas.imputed_v3.both_sexes.tsv.bgz	3
N30	Diagnoses - main ICD10: N30 Cystitis	361194	359619	1575	both_sexes	UKBB	N30.gwas.imputed_v3.both_sexes.tsv.bgz	0
N32	Diagnoses - main ICD10: N32 Other disorders of bladder	361194	356956	4238	both_sexes	UKBB	N32.gwas.imputed_v3.both_sexes.tsv.bgz	0
N39	Diagnoses - main ICD10: N39 Other disorders of urinary system	361194	350643	10551	both_sexes	UKBB	N39.gwas.imputed_v3.both_sexes.tsv.bgz	0
N40	Diagnoses - main ICD10: N40 Hyperplasia of prostate	361194	356085	5109	both_sexes	UKBB	N40.gwas.imputed_v3.both_sexes.tsv.bgz	7
N47	Diagnoses - main ICD10: N47 Redundant prepuce, phimosis and paraphimosis	361194	359651	1543	both_sexes	UKBB	N47.gwas.imputed_v3.both_sexes.tsv.bgz	0
N48	Diagnoses - main ICD10: N48 Other disorders of penis	361194	359877	1317	both_sexes	UKBB	N48.gwas.imputed_v3.both_sexes.tsv.bgz	3
N60	Diagnoses - main ICD10: N60 Benign mammary dysplasia	361194	360037	1157	both_sexes	UKBB	N60.gwas.imputed_v3.both_sexes.tsv.bgz	0
N80	Diagnoses - main ICD10: N80 Endometriosis	361194	359698	1496	both_sexes	UKBB	N80.gwas.imputed_v3.both_sexes.tsv.bgz	0
N81	Diagnoses - main ICD10: N81 Female genital prolapse	361194	353683	7511	both_sexes	UKBB	N81.gwas.imputed_v3.both_sexes.tsv.bgz	70
N84	Diagnoses - main ICD10: N84 Polyp of female genital tract	361194	354208	6986	both_sexes	UKBB	N84.gwas.imputed_v3.both_sexes.tsv.bgz	1
N85	Diagnoses - main ICD10: N85 Other noninflammatory disorders of uterus, except cervix	361194	359705	1489	both_sexes	UKBB	N85.gwas.imputed_v3.both_sexes.tsv.bgz	0
N90	Diagnoses - main ICD10: N90 Other noninflammatory disorders of vulva and perineum	361194	360117	1077	both_sexes	UKBB	N90.gwas.imputed_v3.both_sexes.tsv.bgz	0
N92	Diagnoses - main ICD10: N92 Excessive, frequent and irregular menstruation	361194	352719	8475	both_sexes	UKBB	N92.gwas.imputed_v3.both_sexes.tsv.bgz	0
N94	Diagnoses - main ICD10: N94 Pain and other conditions associated with female genital organs and menstrual cycle	361194	359899	1295	both_sexes	UKBB	N94.gwas.imputed_v3.both_sexes.tsv.bgz	0
O03	Diagnoses - main ICD10: O03 Spontaneous abortion	361194	360044	1150	both_sexes	UKBB	O03.gwas.imputed_v3.both_sexes.tsv.bgz	0
O36	Diagnoses - main ICD10: O36 Maternal care for other known or suspected foetal problems	361194	360045	1149	both_sexes	UKBB	O36.gwas.imputed_v3.both_sexes.tsv.bgz	0
O68	Diagnoses - main ICD10: O68 Labour and delivery complicated by foetal stress [distress]	361194	359312	1882	both_sexes	UKBB	O68.gwas.imputed_v3.both_sexes.tsv.bgz	0
OTHER_ILD_CVD_COMORB	Other ILD-related CVD-co-morbidities	361194	358687	2507	both_sexes	UKBB	OTHER_ILD_CVD_COMORB.gwas.imputed_v3.both_sexes.tsv.bgz	20
PULMONARYDG	Other pulmonary diagnosis	361194	335813	25381	both_sexes	UKBB	PULMONARYDG.gwas.imputed_v3.both_sexes.tsv.bgz	0
PULM_MEDICATIO_COMORB	Medication related adverse effects (Asthma/COPD)	361194	339488	21706	both_sexes	UKBB	PULM_MEDICATIO_COMORB.gwas.imputed_v3.both_sexes.tsv.bgz	162
R07	Diagnoses - main ICD10: R07 Pain in throat and chest	361194	336664	24530	both_sexes	UKBB	R07.gwas.imputed_v3.both_sexes.tsv.bgz	0
R10	Diagnoses - main ICD10: R10 Abdominal and pelvic pain	361194	340954	20240	both_sexes	UKBB	R10.gwas.imputed_v3.both_sexes.tsv.bgz	0
R11	Diagnoses - main ICD10: R11 Nausea and vomiting	361194	358923	2271	both_sexes	UKBB	R11.gwas.imputed_v3.both_sexes.tsv.bgz	0
R31	Diagnoses - main ICD10: R31 Unspecified haematuria	361194	349911	11283	both_sexes	UKBB	R31.gwas.imputed_v3.both_sexes.tsv.bgz	10
R35	Diagnoses - main ICD10: R35 Polyuria	361194	359421	1773	both_sexes	UKBB	R35.gwas.imputed_v3.both_sexes.tsv.bgz	0
R39	Diagnoses - main ICD10: R39 Other symptoms and signs involving the urinary system	361194	358496	2698	both_sexes	UKBB	R39.gwas.imputed_v3.both_sexes.tsv.bgz	0
R42	Diagnoses - main ICD10: R42 Dizziness and giddiness	361194	359514	1680	both_sexes	UKBB	R42.gwas.imputed_v3.both_sexes.tsv.bgz	0
R50	Diagnoses - main ICD10: R50 Fever of unknown origin	361194	360038	1156	both_sexes	UKBB	R50.gwas.imputed_v3.both_sexes.tsv.bgz	0
R56	Diagnoses - main ICD10: R56 Convulsions, not elsewhere classified	361194	360117	1077	both_sexes	UKBB	R56.gwas.imputed_v3.both_sexes.tsv.bgz	0
R59	Diagnoses - main ICD10: R59 Enlarged lymph nodes	361194	360183	1011	both_sexes	UKBB	R59.gwas.imputed_v3.both_sexes.tsv.bgz	0
R69	Diagnoses - main ICD10: R69 Unknown and unspecified causes of morbidity	361194	352914	8280	both_sexes	UKBB	R69.gwas.imputed_v3.both_sexes.tsv.bgz	0
R79	Diagnoses - main ICD10: R79 Other abnormal findings of blood chemistry	361194	358572	2622	both_sexes	UKBB	R79.gwas.imputed_v3.both_sexes.tsv.bgz	36
R93	Diagnoses - main ICD10: R93 Abnormal findings on diagnostic imaging of other body structures	361194	359977	1217	both_sexes	UKBB	R93.gwas.imputed_v3.both_sexes.tsv.bgz	0
RHEUMA_NOS	Other/unspecified rheumatoid arthritis	361194	359913	1281	both_sexes	UKBB	RHEUMA_NOS.gwas.imputed_v3.both_sexes.tsv.bgz	40
S02	Diagnoses - main ICD10: S02 Fracture of skull and facial bones	361194	359843	1351	both_sexes	UKBB	S02.gwas.imputed_v3.both_sexes.tsv.bgz	0
S42	Diagnoses - main ICD10: S42 Fracture of shoulder and upper arm	361194	359403	1791	both_sexes	UKBB	S42.gwas.imputed_v3.both_sexes.tsv.bgz	0
S52	Diagnoses - main ICD10: S52 Fracture of forearm	361194	356114	5080	both_sexes	UKBB	S52.gwas.imputed_v3.both_sexes.tsv.bgz	4
S62	Diagnoses - main ICD10: S62 Fracture at wrist and hand level	361194	359431	1763	both_sexes	UKBB	S62.gwas.imputed_v3.both_sexes.tsv.bgz	0
S72	Diagnoses - main ICD10: S72 Fracture of femur	361194	359391	1803	both_sexes	UKBB	S72.gwas.imputed_v3.both_sexes.tsv.bgz	0
SNORING	Snoring	361194	359889	1305	both_sexes	UKBB	SNORING.gwas.imputed_v3.both_sexes.tsv.bgz	0
STILL_ADULT	Adult-onset Still disease	361194	359708	1486	both_sexes	UKBB	STILL_ADULT.gwas.imputed_v3.both_sexes.tsv.bgz	40
T82	Diagnoses - main ICD10: T82 Complications of cardiac and vascular prosthetic devices, implants and grafts	361194	360061	1133	both_sexes	UKBB	T82.gwas.imputed_v3.both_sexes.tsv.bgz	0
T84	Diagnoses - main ICD10: T84 Complications of internal orthopaedic prosthetic devices, implants and grafts	361194	357475	3719	both_sexes	UKBB	T84.gwas.imputed_v3.both_sexes.tsv.bgz	0
T85	Diagnoses - main ICD10: T85 Complications of other internal prosthetic devices, implants and grafts	361194	359693	1501	both_sexes	UKBB	T85.gwas.imputed_v3.both_sexes.tsv.bgz	0
ULCERNAS	Ulcerative colitis, NAS	361194	359291	1903	both_sexes	UKBB	ULCERNAS.gwas.imputed_v3.both_sexes.tsv.bgz	4
VII_EYE_ADNEXA	Diseases of the eye and adnexa	361194	331316	29878	both_sexes	UKBB	VII_EYE_ADNEXA.gwas.imputed_v3.both_sexes.tsv.bgz	2
VI_NERVOUS	Diseases of the nervous system	361194	339871	21323	both_sexes	UKBB	VI_NERVOUS.gwas.imputed_v3.both_sexes.tsv.bgz	0
V_MENTAL_BEHAV	Mental and behavioural disorders	361194	356892	4302	both_sexes	UKBB	V_MENTAL_BEHAV.gwas.imputed_v3.both_sexes.tsv.bgz	0
XIII_MUSCULOSKELET	Diseases of the musculoskeletal system and connective tissue	361194	284095	77099	both_sexes	UKBB	XIII_MUSCULOSKELET.gwas.imputed_v3.both_sexes.tsv.bgz	2
XII_SKIN_SUBCUTAN	Diseases of the skin and subcutaneous tissue	361194	334120	27074	both_sexes	UKBB	XII_SKIN_SUBCUTAN.gwas.imputed_v3.both_sexes.tsv.bgz	4
XIV_GENITOURINARY	Diseases of the genitourinary system	361194	289574	71620	both_sexes	UKBB	XIV_GENITOURINARY.gwas.imputed_v3.both_sexes.tsv.bgz	16
XIX_INJURY_POISON	Injury, poisoning and certain other consequences of external causes	361194	316398	44796	both_sexes	UKBB	XIX_INJURY_POISON.gwas.imputed_v3.both_sexes.tsv.bgz	2
XI_DIGESTIVE	Diseases of the digestive system	361194	245301	115893	both_sexes	UKBB	XI_DIGESTIVE.gwas.imputed_v3.both_sexes.tsv.bgz	128
XVIII_MISCFINDINGS	Symptoms, signs and abnormal clinical and laboratory findings, not elsewhere classified	361194	263592	97602	both_sexes	UKBB	XVIII_MISCFINDINGS.gwas.imputed_v3.both_sexes.tsv.bgz	0
XVII_MALFORMAT_ABNORMAL	Congenital malformations, deformations and chromosomal abnormalities	361194	359073	2121	both_sexes	UKBB	XVII_MALFORMAT_ABNORMAL.gwas.imputed_v3.both_sexes.tsv.bgz	0
X_RESPIRATORY	Diseases of the respiratory system	361194	335813	25381	both_sexes	UKBB	X_RESPIRATORY.gwas.imputed_v3.both_sexes.tsv.bgz	0
Z42	Diagnoses - main ICD10: Z42 Follow-up care involving plastic surgery	361194	359231	1963	both_sexes	UKBB	Z42.gwas.imputed_v3.both_sexes.tsv.bgz	0
Z43	Diagnoses - main ICD10: Z43 Attention to artificial openings	361194	359838	1356	both_sexes	UKBB	Z43.gwas.imputed_v3.both_sexes.tsv.bgz	0
Z46	Diagnoses - main ICD10: Z46 Fitting and adjustment of other devices	361194	357580	3614	both_sexes	UKBB	Z46.gwas.imputed_v3.both_sexes.tsv.bgz	0
Z47	Diagnoses - main ICD10: Z47 Other orthopaedic follow-up care	361194	358420	2774	both_sexes	UKBB	Z47.gwas.imputed_v3.both_sexes.tsv.bgz	0
Z53	Diagnoses - main ICD10: Z53 Persons encountering health services for specifie procedures, not carried out	361194	359440	1754	both_sexes	UKBB	Z53.gwas.imputed_v3.both_sexes.tsv.bgz	0
age	Age at recruitment	361194	NA	NA	both_sexes	UKBB	age.gwas.imputed_v3.both_sexes.tsv.bgz	0
20001_1050	Cancer code, self-reported: multiple myeloma	361141	361016	125	both_sexes	UKBB	20001_1050.gwas.imputed_v3.both_sexes.tsv.bgz	0
20001_1045	Cancer code, self-reported: testicular cancer	166988	166342	646	male	UKBB	20001_1045.gwas.imputed_v3.male.tsv.bgz	0
20001_1052	Cancer code, self-reported: hodgkins lymphoma / hodgkins disease	361141	360781	360	both_sexes	UKBB	20001_1052.gwas.imputed_v3.both_sexes.tsv.bgz	1
20001_1055	Cancer code, self-reported: chronic lymphocytic	361141	360904	237	both_sexes	UKBB	20001_1055.gwas.imputed_v3.both_sexes.tsv.bgz	1
20001_1024	Cancer code, self-reported: liver/hepatocellular cancer	361141	361003	138	both_sexes	UKBB	20001_1024.gwas.imputed_v3.both_sexes.tsv.bgz	0
20001_1039	Cancer code, self-reported: ovarian cancer	194153	193533	620	female	UKBB	20001_1039.gwas.imputed_v3.female.tsv.bgz	0
20001_1030	Cancer code, self-reported: eye and/or adnexal cancer	361141	361032	109	both_sexes	UKBB	20001_1030.gwas.imputed_v3.both_sexes.tsv.bgz	0
20001_1018	Cancer code, self-reported: stomach cancer	361141	361008	133	both_sexes	UKBB	20001_1018.gwas.imputed_v3.both_sexes.tsv.bgz	0
20001_1063	Cancer code, self-reported: primary bone cancer	361141	361030	111	both_sexes	UKBB	20001_1063.gwas.imputed_v3.both_sexes.tsv.bgz	0
CGS02	Breast cancer	69626	NA	NA	female	Literature	http://www.reprogen.org/Menopause_HapMap2_DayNG2015_18112015.txt.gz	40
CGS03	Breast cancer	139274	122977	105974	female	Literature	ftp://ftp.ebi.ac.uk/pub/databases/gwas/summary_statistics/MichailidouK_29059683_GCST004988	64
CGS04	Breast cancer	95283	NA	NA	female	Literature	http://jenger.riken.jp/102/	1
CGS05	Malignant neoplasm of breast (all cancers excluded)	107722	NA	NA	female	Literature	https://storage.googleapis.com/finngen-public-data-r5/summary_stats/finngen_R5_C3_BREAST_EXALLC.gz	3
CGS06	Malignant neoplasm of cervix uteri (all cancers excluded)	100969	NA	NA	female	Literature	https://storage.googleapis.com/finngen-public-data-r5/summary_stats/finngen_R5_C3_CERVIX_UTERI_EXALLC.gz	5
CGS07	Colorectal cancer	202807	NA	NA	both_sexes	Literature	http://jenger.riken.jp/49/	4
CGS08	Malignant neoplasm of breast, HER2-negative (all cancers excluded)	106676	NA	NA	female	Literature	https://storage.googleapis.com/finngen-public-data-r5/summary_stats/finngen_R5_C3_BREAST_HER2NEG_EXALLC.gz	3
CGS09	Colorectal cancer (all cancers excluded)	177028	NA	NA	both_sexes	Literature	https://storage.googleapis.com/finngen-public-data-r5/summary_stats/finngen_R5_C3_COLORECTAL_EXALLC.gz	0
CGS10	Endometrial cancer	121885	NA	NA	female	Literature	ftp://ftp.ebi.ac.uk/pub/databases/gwas/summary_statistics/O'MaraTA_30093612_GCST006464	2
CGS12	malignant neoplasm of female genital organs (all cancers excluded)	102986	NA	NA	female	Literature	https://storage.googleapis.com/finngen-public-data-r5/summary_stats/finngen_R5_C3_FEMALE_GENITAL_EXALLC.gz	3
CGS13	Gastric cancer	202308	NA	NA	both_sexes	Literature	http://jenger.riken.jp/61/	11
CGS15	Lung cancer	212453	NA	NA	both_sexes	Literature	http://jenger.riken.jp/75/	1
CGS16	Doctor diagnosed lung cancer (not mesothelioma)	91787	NA	NA	both_sexes	Literature	https://broad-ukb-sumstats-us-east-1.s3.amazonaws.com/round2/additive-tsvs/22140.gwas.imputed_v3.both_sexes.tsv.bgz -O 22140.gwas.imputed_v3.both_sexes.tsv.bgz	0
CGS21	Malignant neoplasm of breast, HER-positive (all cancers excluded)	103530	NA	NA	female	Literature	https://storage.googleapis.com/finngen-public-data-r5/summary_stats/finngen_R5_C3_BREAST_HERPLUS_EXALLC.gz	1
CGS22	Non-small cell lung cancer (all cancers excluded)	175633	NA	NA	both_sexes	Literature	https://storage.googleapis.com/finngen-public-data-r5/summary_stats/finngen_R5_C3_LUNG_NONSMALL_EXALLC.gz	2
CGS23	Malignant neoplasm of breast, HER-negative (all cancers excluded)	102359	NA	NA	female	Literature	https://storage.googleapis.com/finngen-public-data-r5/summary_stats/finngen_R5_C3_BREAST_HERNEG_EXALLC.gz	0
CGS24	Malignant neoplasm of bronchus and lung (all cancers excluded)	175674	NA	NA	both_sexes	Literature	https://storage.googleapis.com/finngen-public-data-r5/summary_stats/finngen_R5_C3_BRONCHUS_LUNG_EXALLC.gz	2
CGS27	Follicular lymphoma (all cancers excluded)	181278	NA	NA	both_sexes	Literature	https://storage.googleapis.com/finngen-public-data-r5/summary_stats/finngen_R5_CD2_FOLLICULAR_LYMPHOMA_EXALLC.gz	2
CGS28	Primary_lymphoid and hematopoietic malignant neoplasms (all cancers excluded)	184293	NA	NA	both_sexes	Literature	https://storage.googleapis.com/finngen-public-data-r5/summary_stats/finngen_R5_CD2_PRIMARY_LYMPHOID_HEMATOPOIETIC_EXALLC.gz	0
CGS29	malignant neoplasm of male genital organs (all cancers excluded)	81227	NA	NA	male	Literature	https://storage.googleapis.com/finngen-public-data-r5/summary_stats/finngen_R5_C3_MALE_GENITAL_EXALLC.gz	10
CGS32	Invasive epithelial ovarian cancer	63347	NA	NA	female	Literature	ftp://ftp.ebi.ac.uk/pub/databases/gwas/summary_statistics/PhelanCM_28346442_GCST004415	0
CGS34	Pancreatic cancer	196187	NA	NA	female	Literature	http://jenger.riken.jp/82/	1
CGS35	Prostate cancer	140254	NA	NA	male	Literature	ftp://ftp.ebi.ac.uk/pub/databases/gwas/summary_statistics/SchumacherFR_29892016_GCST006085	71
CGS36	Prostate cancer	109347	NA	NA	male	Literature	http://jenger.riken.jp/90/	10
CGS37	Malignant neoplasm of prostate (all cancers excluded)	80996	NA	NA	male	Literature	https://storage.googleapis.com/finngen-public-data-r5/summary_stats/finngen_R5_C3_PROSTATE_EXALLC.gz	12
CGS39	Malignant neoplasm of skin (all cancers excluded)	184390	NA	NA	both_sexes	Literature	https://storage.googleapis.com/finngen-public-data-r5/summary_stats/finngen_R5_C3_SKIN_EXALLC.gz	16
CGS40	Carcinoma in situ of skin (all cancers excluded)	181624	NA	NA	both_sexes	Literature	https://storage.googleapis.com/finngen-public-data-r5/summary_stats/finngen_R5_CD2_INSITU_SKIN_EXALLC.gz	7
CGS41	Carcinoma in situ of skin of other and unspecified parts of face (all cancers excluded)	181238	NA	NA	both_sexes	Literature	https://storage.googleapis.com/finngen-public-data-r5/summary_stats/finngen_R5_CD2_INSITU_SKIN_FACE_EXALLC.gz	2
CGS43	Malignant neoplasm of stomach (all cancers excluded)	174639	NA	NA	both_sexes	Literature	https://storage.googleapis.com/finngen-public-data-r5/summary_stats/finngen_R5_C3_STOMACH_EXALLC.gz	1
CGS45	Malignant neoplasm of thyroid gland (all cancers excluded)	174995	NA	NA	female	Literature	https://storage.googleapis.com/finngen-public-data-r5/summary_stats/finngen_R5_C3_THYROID_GLAND_EXALLC.gz	0
CGS46	Leiomyoma of uterus (all cancers excluded)	107042	NA	NA	female	Literature	https://storage.googleapis.com/finngen-public-data-r5/summary_stats/finngen_R5_CD2_BENIGN_LEIOMYOMA_UTERI_EXALLC.gz	17
CGS47	Breast cancer	428231	NA	NA	female	Literature	http://ftp.ebi.ac.uk/pub/databases/gwas/summary_statistics/GCST90011001-GCST90012000/GCST90011804	5
CGS48	Esophageal or stomach cancer	411441	NA	NA	both_sexes	Literature	http://ftp.ebi.ac.uk/pub/databases/gwas/summary_statistics/GCST90011001-GCST90012000/GCST90011807	0
CGS49	Prostate cancer	421142	NA	NA	male	Literature	http://ftp.ebi.ac.uk/pub/databases/gwas/summary_statistics/GCST90011001-GCST90012000/GCST90011808	21
CGS50	Colorectal cancer	414143	NA	NA	both_sexes	Literature	http://ftp.ebi.ac.uk/pub/databases/gwas/summary_statistics/GCST90011001-GCST90012000/GCST90011811	0
CGS51	Lymphocytic leukemia	411202	NA	NA	both_sexes	Literature	http://ftp.ebi.ac.uk/pub/databases/gwas/summary_statistics/GCST90011001-GCST90012000/GCST90011814	3
CGS52	Cervical cancer	416913	NA	NA	female	Literature	http://ftp.ebi.ac.uk/pub/databases/gwas/summary_statistics/GCST90011001-GCST90012000/GCST90011816	3
CGS53	Kidney cancer	411688	NA	NA	both_sexes	Literature	http://ftp.ebi.ac.uk/pub/databases/gwas/summary_statistics/GCST90011001-GCST90012000/GCST90011818	0
CGS54	Non-Hodgkin's lymphoma	412750	NA	NA	both_sexes	Literature	http://ftp.ebi.ac.uk/pub/databases/gwas/summary_statistics/GCST90011001-GCST90012000/GCST90011819	0

## Sheet: Table S6
Supplementary Table 6. aWatershed prioritized APA-related rare variants that overlapped with variants in GWAS summary data of 1186 UKBB traits.
#VariantID: rsid of rare variants
#MAF: variant minor allele frequency in UKBB cohort
#beta: trait effect size in GWAS summary statistics
#pvalue: significance of GWAS association
#trait: UKBB trait ID of analyzed traits
#genename: Gene symbol for the genes near aOutlier prioritized RVs
#Posterior_APA: posterior probability of a rare variant assigned by aWatershed based on aOutlier signals.
VariantID	MAF	beta	pvalue	trait	genename	Posterior_APA
rs78731604	0.00278895	-0.0278306	0.625628	100002_irnt	CALCOCO1	0.50041
rs78731604	0.00278895	0.0127498	0.826842	100011_irnt	CALCOCO1	0.50041
rs78731604	0.00278895	0.0171458	0.769587	100012_irnt	CALCOCO1	0.50041
rs78731604	0.00278895	-0.0922084	0.0582334	100022	CALCOCO1	0.50041
rs78731604	0.00278895	-0.0486787	0.406784	100024_irnt	CALCOCO1	0.50041
rs78731604	0.00279036	0.113621	0.328321	100150	CALCOCO1	0.50041
rs78731604	0.00258674	-0.0317483	0.708255	1001	CALCOCO1	0.50041
rs78731604	0.00279036	-0.00729519	0.784732	100240	CALCOCO1	0.50041
rs78731604	0.00279036	-0.0202066	0.861985	100250	CALCOCO1	0.50041
rs78731604	0.00279036	0.00856065	0.904226	100270	CALCOCO1	0.50041
rs78731604	0.00279036	0.0165639	0.677306	100280	CALCOCO1	0.50041
rs78731604	0.00279036	0.00111976	0.979795	100370	CALCOCO1	0.50041
rs78731604	0.00279036	0.0102472	0.664029	100390	CALCOCO1	0.50041
rs78731604	0.00279036	5.90458	0.545933	100400	CALCOCO1	0.50041
rs78731604	0.00279036	0.0321168	0.565742	100460	CALCOCO1	0.50041
rs78731604	0.00279112	0.0457217	0.0820235	100520	CALCOCO1	0.50041
rs78731604	0.00279036	-0.0585657	0.045107	100580	CALCOCO1	0.50041
rs78731604	0.00279036	-0.0113507	0.696171	100630	CALCOCO1	0.50041
rs78731604	0.00279036	-0.143208	0.022991	100670	CALCOCO1	0.50041
rs78731604	0.00279036	-0.0229913	0.719445	100710	CALCOCO1	0.50041
rs78731604	0.00265937	0.0587231	0.168603	1011	CALCOCO1	0.50041
rs78731604	0.00279036	-0.00200916	0.941878	102130	CALCOCO1	0.50041
rs78731604	0.00265946	0.0343617	0.47812	1021	CALCOCO1	0.50041
rs78731604	0.00279036	0.0125009	0.769333	102330	CALCOCO1	0.50041
rs78731604	0.00279036	0.0764439	0.440387	102360	CALCOCO1	0.50041
rs78731604	0.00279036	-0.037392	0.183499	102400	CALCOCO1	0.50041
rs78731604	0.00279036	-0.0471586	0.107688	102800	CALCOCO1	0.50041
rs78731604	0.00279063	0.00585249	0.710658	102840	CALCOCO1	0.50041
rs78731604	0.00273252	0.022479	0.330016	102_irnt	CALCOCO1	0.50041
rs78731604	0.00279063	0.0892401	0.0513884	103020	CALCOCO1	0.50041
rs78731604	0.00271863	-0.0169668	0.496776	1031	CALCOCO1	0.50041
rs78731604	0.00279036	0.0321825	0.149599	103990	CALCOCO1	0.50041
rs78731604	0.00279036	-0.0663106	0.284041	104450	CALCOCO1	0.50041
rs78731604	0.00279036	0.020153	0.747798	104460	CALCOCO1	0.50041
rs78731604	0.00279036	-0.22356	0.965127	104920	CALCOCO1	0.50041
rs78731604	0.00272339	0.00197759	0.923263	1050	CALCOCO1	0.50041
rs78731604	0.00270807	0.00340556	0.810972	1060	CALCOCO1	0.50041
rs78731604	0.00273505	0.027711	0.104199	1070	CALCOCO1	0.50041
rs78731604	0.00272128	-0.0423242	0.0324556	1080	CALCOCO1	0.50041
rs78731604	0.00275111	0.00744337	0.708617	1090	CALCOCO1	0.50041
rs78731604	0.00270352	-0.0255783	0.346929	110001	CALCOCO1	0.50041
rs78731604	0.00272623	0.00239948	0.896445	1100	CALCOCO1	0.50041
rs78731604	0.00271018	-0.00114367	0.969818	1110	CALCOCO1	0.50041
rs78731604	0.00273943	-0.0151544	0.620451	1120	CALCOCO1	0.50041
rs78731604	0.00273343	0.0213051	0.293714	1130	CALCOCO1	0.50041
rs78731604	0.00272265	0.0202705	0.198508	1140	CALCOCO1	0.50041
rs78731604	0.00273919	-0.00626266	0.593663	1150_1	CALCOCO1	0.50041
rs78731604	0.00273919	0.00820582	0.498181	1150_2	CALCOCO1	0.50041
rs78731604	0.00271631	-0.0123779	0.466761	1170	CALCOCO1	0.50041
rs78731604	0.00270398	-0.022011	0.321557	1180	CALCOCO1	0.50041
rs78731604	0.00273698	0.00765352	0.487869	1210	CALCOCO1	0.50041
rs78731604	0.00217251	0.0305845	0.832692	12336_irnt	CALCOCO1	0.50041
rs78731604	0.00217291	0.0380366	0.77849	12340_irnt	CALCOCO1	0.50041
rs78731604	0.00271872	0.000748651	0.979488	1249	CALCOCO1	0.50041
rs78731604	0.00273195	-0.00761384	0.580001	1279	CALCOCO1	0.50041
rs78731604	0.0027083	0.0246991	0.141979	1289	CALCOCO1	0.50041
rs78731604	0.00273115	0.00354773	0.819154	1299	CALCOCO1	0.50041
rs78731604	0.00269096	-0.0409109	0.0231999	129_irnt	CALCOCO1	0.50041
rs78731604	0.00272335	-0.00436119	0.74191	1309	CALCOCO1	0.50041
rs78731604	0.00269096	-0.0280482	0.169854	130_irnt	CALCOCO1	0.50041
rs78731604	0.00273749	0.0254283	0.157099	1319	CALCOCO1	0.50041
rs78731604	0.00271192	-0.00635409	0.757075	1329	CALCOCO1	0.50041
rs78731604	0.00271629	0.0145715	0.405679	1339	CALCOCO1	0.50041
rs78731604	0.0027173	0.0244582	0.281007	1349	CALCOCO1	0.50041
rs78731604	0.00271366	-0.00695371	0.32008	134	CALCOCO1	0.50041
rs78731604	0.00271373	-0.0112683	0.566771	1359	CALCOCO1	0.50041
rs78731604	0.00271552	-0.0118444	0.522416	1369	CALCOCO1	0.50041
rs78731604	0.00271168	-0.00583548	0.711111	1379	CALCOCO1	0.50041
rs78731604	0.00271083	0.014152	0.373717	1389	CALCOCO1	0.50041
rs78731604	0.00271096	-0.0193252	0.425702	1408	CALCOCO1	0.50041
rs78731604	0.00271337	-0.00316191	0.565088	1418_1	CALCOCO1	0.50041
rs78731604	0.00271337	-0.00301045	0.740228	1418_3	CALCOCO1	0.50041
rs78731604	0.00271337	-0.000587316	0.889542	1418_4	CALCOCO1	0.50041
rs78731604	0.00271337	-0.00246276	0.536903	1418_6	CALCOCO1	0.50041
rs78731604	0.00271864	-0.0104907	0.123613	1428_0	CALCOCO1	0.50041
rs78731604	0.00271864	-0.0110219	0.309982	1428_1	CALCOCO1	0.50041
rs78731604	0.00271864	0.0209882	0.0616598	1428_3	CALCOCO1	0.50041
rs78731604	0.00272498	-0.0146962	0.497821	1438_irnt	CALCOCO1	0.50041
rs78731604	0.002728	-0.00418131	0.675184	1448_1	CALCOCO1	0.50041
rs78731604	0.002728	-0.00105218	0.925319	1448_3	CALCOCO1	0.50041
rs78731604	0.002728	-0.00291736	0.523129	1448_4	CALCOCO1	0.50041
rs78731604	0.00271289	-0.0143052	0.458069	1458	CALCOCO1	0.50041
rs78731604	0.00270092	-0.00777913	0.403315	1468_1	CALCOCO1	0.50041
rs78731604	0.00270092	-0.00157441	0.868257	1468_2	CALCOCO1	0.50041
rs78731604	0.00270092	-0.00361123	0.736929	1468_3	CALCOCO1	0.50041
rs78731604	0.00270092	-0.00254045	0.799634	1468_4	CALCOCO1	0.50041
rs78731604	0.00270092	0.0155052	0.11247	1468_5	CALCOCO1	0.50041
rs78731604	0.00271503	0.0112887	0.55592	1478	CALCOCO1	0.50041
rs78731604	0.00270912	-0.00399059	0.861917	1488_irnt	CALCOCO1	0.50041
rs78731604	0.00274757	0.00432285	0.804227	1498	CALCOCO1	0.50041
rs78731604	0.00271301	0.0217316	0.0306067	1508_1	CALCOCO1	0.50041
rs78731604	0.00271301	-0.0102031	0.418693	1508_2	CALCOCO1	0.50041
rs78731604	0.00271301	-0.0106612	0.318064	1508_3	CALCOCO1	0.50041
rs78731604	0.00274326	-0.0115254	0.557021	1528	CALCOCO1	0.50041
rs78731604	0.00271861	0.00900626	0.412553	1538_0	CALCOCO1	0.50041
rs78731604	0.00271861	0.00211066	0.760737	1538_1	CALCOCO1	0.50041
rs78731604	0.00271861	-0.0111169	0.271997	1538_2	CALCOCO1	0.50041
rs78731604	0.00271674	0.0649217	0.0489531	1558	CALCOCO1	0.50041
rs78731604	0.00265156	-0.0229234	0.309796	1568	CALCOCO1	0.50041
rs78731604	0.00265892	-0.0275128	0.229154	1578	CALCOCO1	0.50041
rs78731604	0.00265047	-0.0177798	0.337108	1588	CALCOCO1	0.50041
rs78731604	0.00264736	0.016128	0.498403	1598	CALCOCO1	0.50041
rs78731604	0.00275017	0.0123253	0.382008	1618	CALCOCO1	0.50041
rs78731604	0.00267024	0.0259839	0.132276	1628	CALCOCO1	0.50041
rs78731604	0.00268683	-0.000619731	0.95718	1677	CALCOCO1	0.50041
rs78731604	0.00271693	0.0279251	0.0701375	1687	CALCOCO1	0.50041
rs78731604	0.00270874	0.013021	0.398116	1697	CALCOCO1	0.50041
rs78731604	0.00271534	-0.00240877	0.735895	1707_1	CALCOCO1	0.50041
rs78731604	0.00271534	0.00197426	0.766548	1707_2	CALCOCO1	0.50041
rs78731604	0.00271534	0.000434511	0.881333	1707_3	CALCOCO1	0.50041
rs78731604	0.00271225	0.00258971	0.844054	1717	CALCOCO1	0.50041
rs78731604	0.00273963	0.0220059	0.323557	1727	CALCOCO1	0.50041
rs78731604	0.00271935	-0.0297974	0.19596	1737	CALCOCO1	0.50041
rs78731604	0.00271463	-0.00488724	0.496359	1747_1	CALCOCO1	0.50041
rs78731604	0.00271463	0.000888132	0.851433	1747_2	CALCOCO1	0.50041
rs78731604	0.00271463	-0.00319432	0.773903	1747_3	CALCOCO1	0.50041
rs78731604	0.00271463	0.00594243	0.586743	1747_4	CALCOCO1	0.50041
rs78731604	0.00271463	-4.69866e-06	0.99918	1747_5	CALCOCO1	0.50041
rs78731604	0.00275265	0.0126723	0.270513	1757	CALCOCO1	0.50041
rs78731604	0.00271328	-0.00124069	0.644294	1767	CALCOCO1	0.50041
rs78731604	0.00270857	0.0132935	0.234362	1787	CALCOCO1	0.50041
rs78731604	0.00270099	-0.00798733	0.333366	1797	CALCOCO1	0.50041
rs78731604	0.00275325	0.0161576	0.529094	1807_irnt	CALCOCO1	0.50041
rs78731604	0.00271527	-0.0063156	0.506145	1835	CALCOCO1	0.50041
rs78731604	0.00271646	0.0158764	0.479127	189_irnt	CALCOCO1	0.50041
rs78731604	0.00273111	0.0154913	0.168538	1920	CALCOCO1	0.50041
rs78731604	0.00270847	0.00984496	0.375289	1930	CALCOCO1	0.50041
rs78731604	0.00272426	0.001257	0.902784	1940	CALCOCO1	0.50041
rs78731604	0.00272504	0.000789769	0.943573	1950	CALCOCO1	0.50041
rs78731604	0.00272357	-0.00554039	0.617496	1960	CALCOCO1	0.50041
rs78731604	0.0027087	0.0140393	0.147652	1970	CALCOCO1	0.50041
rs78731604	0.00272715	0.00778069	0.485897	1980	CALCOCO1	0.50041
rs78731604	0.00273019	-0.00234317	0.786119	1990	CALCOCO1	0.50041
rs78731604	0.00271362	-0.0206967	0.0314295	20002_1065	CALCOCO1	0.50041
rs78731604	0.00271362	0.00230118	0.554834	20002_1074	CALCOCO1	0.50041
rs78731604	0.00271362	-0.000970772	0.770902	20002_1075	CALCOCO1	0.50041
rs78731604	0.00271362	-0.0035108	0.267298	20002_1094	CALCOCO1	0.50041
rs78731604	0.00271362	0.00234473	0.745962	20002_1111	CALCOCO1	0.50041
rs78731604	0.00271362	0.00181813	0.526118	20002_1162	CALCOCO1	0.50041
rs78731604	0.00271362	0.000113359	0.979224	20002_1220	CALCOCO1	0.50041
rs78731604	0.00271362	-0.00050724	0.915939	20002_1226	CALCOCO1	0.50041
rs78731604	0.00271362	-0.00241045	0.526863	20002_1265	CALCOCO1	0.50041
rs78731604	0.00271362	0.00163129	0.537162	20002_1278	CALCOCO1	0.50041
rs78731604	0.00271362	0.00128087	0.806778	20002_1286	CALCOCO1	0.50041
rs78731604	0.00271362	-0.00502048	0.0564221	20002_1287	CALCOCO1	0.50041
rs78731604	0.00271362	0.00439679	0.138734	20002_1294	CALCOCO1	0.50041
rs78731604	0.00271362	-0.00315983	0.258847	20002_1309	CALCOCO1	0.50041
rs78731604	0.00271362	-0.00175546	0.543851	20002_1312	CALCOCO1	0.50041
rs78731604	0.00271362	0.00381245	0.467121	20002_1387	CALCOCO1	0.50041
rs78731604	0.00271362	-0.00406858	0.256374	20002_1452	CALCOCO1	0.50041
rs78731604	0.00271362	-0.000424266	0.945021	20002_1465	CALCOCO1	0.50041
rs78731604	0.00271362	-0.00149996	0.573768	20002_1466	CALCOCO1	0.50041
rs78731604	0.00271362	-0.00991322	0.169064	20002_1473	CALCOCO1	0.50041
rs78731604	0.00271362	0.00205531	0.544186	20002_1474	CALCOCO1	0.50041
rs78731604	0.00271362	-0.00328955	0.459611	20002_99999	CALCOCO1	0.50041
rs78731604	0.00271362	0.00450037	0.222468	20003_1140860696	CALCOCO1	0.50041
rs78731604	0.00271362	-0.000851475	0.85707	20003_1140860806	CALCOCO1	0.50041
rs78731604	0.00271362	-0.00526287	0.448949	20003_1140861958	CALCOCO1	0.50041
rs78731604	0.00271362	0.00165756	0.660817	20003_1140861998	CALCOCO1	0.50041
rs78731604	0.00271362	0.0035479	0.395135	20003_1140864752	CALCOCO1	0.50041
rs78731604	0.00271362	0.00611675	0.156851	20003_1140866738	CALCOCO1	0.50041
rs78731604	0.00271362	-0.00674475	0.364678	20003_1140868226	CALCOCO1	0.50041
rs78731604	0.00271362	-0.00703851	0.341782	20003_1140871310	CALCOCO1	0.50041
rs78731604	0.00271362	-0.00163992	0.544715	20003_1140879760	CALCOCO1	0.50041
rs78731604	0.00271362	-0.00349054	0.428385	20003_1140879802	CALCOCO1	0.50041
rs78731604	0.00271362	-0.00177101	0.613346	20003_1140884600	CALCOCO1	0.50041
rs78731604	0.00271362	-0.000484984	0.886549	20003_1140923346	CALCOCO1	0.50041
rs78731604	0.00271362	-0.00217589	0.569206	20003_1141146234	CALCOCO1	0.50041
rs78731604	0.00271362	-0.00318497	0.570553	20003_1141188442	CALCOCO1	0.50041
rs78731604	0.00271362	-0.000123937	0.977644	20003_1141191044	CALCOCO1	0.50041
rs78731604	0.00271362	-0.00788821	0.124549	20003_1141194794	CALCOCO1	0.50041
rs78731604	0.00271362	-0.00300501	0.729697	20003_2038460150	CALCOCO1	0.50041
rs78731604	0.00271696	-0.00343959	0.762775	2000	CALCOCO1	0.50041
rs78731604	0.00271061	0.0099889	0.559304	20015_irnt	CALCOCO1	0.50041
rs78731604	0.00265088	-0.040765	0.304367	20016_irnt	CALCOCO1	0.50041
rs78731604	0.00266017	-0.00854843	0.670266	20018	CALCOCO1	0.50041
rs78731604	0.00264783	0.0548013	0.163249	20019_irnt	CALCOCO1	0.50041
rs78731604	0.00265482	0.0172883	0.564196	20022_irnt	CALCOCO1	0.50041
rs78731604	0.0027154	-0.027223	0.199638	20023_irnt	CALCOCO1	0.50041
rs78731604	0.00271805	-0.0412825	0.0519143	20074_irnt	CALCOCO1	0.50041
rs78731604	0.00271805	-0.0232088	0.233632	20075_irnt	CALCOCO1	0.50041
rs78731604	0.00279036	0.00378444	0.861345	20079_2	CALCOCO1	0.50041
rs78731604	0.00279036	0.000453904	0.982711	20084_473	CALCOCO1	0.50041
rs78731604	0.00266644	0.00681979	0.563095	20107_100	CALCOCO1	0.50041
rs78731604	0.00266644	-0.00021004	0.984406	20107_101	CALCOCO1	0.50041
rs78731604	0.00266644	0.00361924	0.47895	20107_10	CALCOCO1	0.50041
rs78731604	0.00266644	-0.00251342	0.698015	20107_13	CALCOCO1	0.50041
rs78731604	0.00266644	-0.0155647	0.170339	20107_1	CALCOCO1	0.50041
rs78731604	0.00266644	0.00564908	0.412087	20107_3	CALCOCO1	0.50041
rs78731604	0.00266644	0.00179035	0.753137	20107_4	CALCOCO1	0.50041
rs78731604	0.00266644	-0.00137739	0.855081	20107_6	CALCOCO1	0.50041
rs78731604	0.00266644	-0.00343929	0.731845	20107_8	CALCOCO1	0.50041
rs78731604	0.00266644	-0.00237654	0.736392	20107_9	CALCOCO1	0.50041
rs78731604	0.00270051	0.00858461	0.362178	2010	CALCOCO1	0.50041
rs78731604	0.00271452	0.0043064	0.709064	20110_100	CALCOCO1	0.50041
rs78731604	0.00271452	0.00168607	0.865959	20110_101	CALCOCO1	0.50041
rs78731604	0.00271452	0.00778208	0.229536	20110_10	CALCOCO1	0.50041
rs78731604	0.00271452	0.000181674	0.951102	20110_11	CALCOCO1	0.50041
rs78731604	0.00271452	-0.00596169	0.518725	20110_1	CALCOCO1	0.50041
rs78731604	0.00271452	-0.00122092	0.879995	20110_2	CALCOCO1	0.50041
rs78731604	0.00271452	-0.000487171	0.915304	20110_3	CALCOCO1	0.50041
rs78731604	0.00271452	-0.00347867	0.589801	20110_5	CALCOCO1	0.50041
rs78731604	0.00271452	0.00253325	0.641414	20110_6	CALCOCO1	0.50041
rs78731604	0.00271452	0.00140575	0.89574	20110_8	CALCOCO1	0.50041
rs78731604	0.00271452	-0.00680377	0.313509	20110_9	CALCOCO1	0.50041
rs78731604	0.00271012	0.0121292	0.30165	20111_100	CALCOCO1	0.50041
rs78731604	0.00271012	-0.00341232	0.647647	20111_1	CALCOCO1	0.50041
rs78731604	0.00271012	-0.000515325	0.907171	20111_2	CALCOCO1	0.50041
rs78731604	0.00271012	-0.00102367	0.843547	20111_5	CALCOCO1	0.50041
rs78731604	0.00271012	-0.000458639	0.911328	20111_6	CALCOCO1	0.50041
rs78731604	0.00271012	-0.0222074	0.0292416	20111_8	CALCOCO1	0.50041
rs78731604	0.00271012	0.00543268	0.433326	20111_9	CALCOCO1	0.50041
rs78731604	0.00271194	0.000731883	0.947701	20116_0	CALCOCO1	0.50041
rs78731604	0.00271194	0.00643054	0.547083	20116_1	CALCOCO1	0.50041
rs78731604	0.00271194	-0.00716242	0.296038	20116_2	CALCOCO1	0.50041
rs78731604	0.00271674	0.00898442	0.0215463	20117_0	CALCOCO1	0.50041
rs78731604	0.00271674	-0.011581	0.0384343	20117_2	CALCOCO1	0.50041
rs78731604	0.00271867	0.00637778	0.177689	20118_11	CALCOCO1	0.50041
rs78731604	0.0026181	-0.0370513	0.0735239	20126_0	CALCOCO1	0.50041
rs78731604	0.00276615	-0.000487602	0.984088	20127_irnt	CALCOCO1	0.50041
rs78731604	0.00265088	-0.0505362	0.153942	20128	CALCOCO1	0.50041
rs78731604	0.00269885	0.00411593	0.828112	20150_irnt	CALCOCO1	0.50041
rs78731604	0.00269885	-0.00838387	0.647382	20151_irnt	CALCOCO1	0.50041
rs78731604	0.00269885	-0.00460067	0.667655	20152	CALCOCO1	0.50041
rs78731604	0.00266971	0.00657214	0.690893	20153_irnt	CALCOCO1	0.50041
rs78731604	0.00266971	-0.0368102	0.354987	20154_irnt	CALCOCO1	0.50041
rs78731604	0.00271299	-0.00467975	0.670254	20160	CALCOCO1	0.50041
rs78731604	0.00271526	0.00582422	0.502422	2020	CALCOCO1	0.50041
rs78731604	0.00272941	0.00103482	0.919136	2030	CALCOCO1	0.50041
rs78731604	0.00252642	-0.00650863	0.879601	20403	CALCOCO1	0.50041
rs78731604	0.00250254	0.00953421	0.408598	20405_0	CALCOCO1	0.50041
rs78731604	0.00250254	0.00187683	0.82773	20405_1	CALCOCO1	0.50041
rs78731604	0.00253733	0.0136464	0.616707	20408	CALCOCO1	0.50041
rs78731604	0.00253042	0.00807482	0.83268	20409	CALCOCO1	0.50041
rs78731604	0.00273419	0.00149323	0.879755	2040	CALCOCO1	0.50041
rs78731604	0.00249996	-0.00118416	0.88627	20411_0	CALCOCO1	0.50041
rs78731604	0.00254228	0.00302838	0.705542	20412	CALCOCO1	0.50041
rs78731604	0.00253182	-0.00380384	0.914798	20413	CALCOCO1	0.50041
rs78731604	0.00249758	0.0394922	0.439257	20414	CALCOCO1	0.50041
rs78731604	0.0025303	0.0439977	0.359996	20416	CALCOCO1	0.50041
rs78731604	0.00244737	-0.0306941	0.416164	20417	CALCOCO1	0.50041
rs78731604	0.00240521	0.130681	0.154035	20420_irnt	CALCOCO1	0.50041
rs78731604	0.00246821	-0.0431082	0.214911	20422	CALCOCO1	0.50041
rs78731604	0.00254571	-0.0105461	0.584496	20425	CALCOCO1	0.50041
rs78731604	0.00250155	0.0185434	0.348338	20441	CALCOCO1	0.50041
rs78731604	0.00250189	-0.0651682	0.0855858	20453	CALCOCO1	0.50041
rs78731604	0.002501	-0.0268763	0.486763	20459	CALCOCO1	0.50041
rs78731604	0.00250971	0.0457116	0.182373	20460	CALCOCO1	0.50041
rs78731604	0.0024938	0.0023637	0.94014	20479	CALCOCO1	0.50041
rs78731604	0.00248868	-0.00483639	0.563123	20480	CALCOCO1	0.50041
rs78731604	0.00249919	0.000588459	0.982695	20488	CALCOCO1	0.50041
rs78731604	0.00249856	-0.0291531	0.29679	20495	CALCOCO1	0.50041
rs78731604	0.00249788	-0.0562373	0.066526	20497	CALCOCO1	0.50041
rs78731604	0.00249803	-0.0880765	0.00735812	20498	CALCOCO1	0.50041
rs78731604	0.00249412	-0.0181478	0.357767	20499	CALCOCO1	0.50041
rs78731604	0.00248011	-0.0130076	0.499322	20500	CALCOCO1	0.50041
rs78731604	0.00250389	-0.008538	0.637178	20502	CALCOCO1	0.50041
rs78731604	0.00250461	-0.0310514	0.233376	20509	CALCOCO1	0.50041
rs78731604	0.00270698	-0.00274192	0.843456	2050	CALCOCO1	0.50041
rs78731604	0.002502	-0.0441186	0.115625	20515	CALCOCO1	0.50041
rs78731604	0.00250378	-0.0797539	0.0306338	20517	CALCOCO1	0.50041
rs78731604	0.00250365	-0.0690813	0.0379563	20519	CALCOCO1	0.50041
rs78731604	0.00249645	-0.0270774	0.327214	20520	CALCOCO1	0.50041
rs78731604	0.00250125	-0.0192328	0.601117	20521	CALCOCO1	0.50041
rs78731604	0.00250115	-0.0215599	0.414561	20523	CALCOCO1	0.50041
rs78731604	0.00248934	-0.0439011	0.20208	20525	CALCOCO1	0.50041
rs78731604	0.00249741	-0.0069453	0.564906	20526	CALCOCO1	0.50041
rs78731604	0.00250717	0.00146611	0.91609	20530	CALCOCO1	0.50041
rs78731604	0.00252419	-0.0327202	0.022579	20531	CALCOCO1	0.50041
rs78731604	0.00267896	-0.0315271	0.251342	20533	CALCOCO1	0.50041
rs78731604	0.00267896	0.0343562	0.18241	20534	CALCOCO1	0.50041
rs78731604	0.00266921	-0.0237149	0.271754	20536_1	CALCOCO1	0.50041
rs78731604	0.00250297	0.0174281	0.740771	20537	CALCOCO1	0.50041
rs78731604	0.00250542	-0.0144878	0.408118	20541	CALCOCO1	0.50041
rs78731604	0.00249775	-0.00459862	0.783099	20544_11	CALCOCO1	0.50041
rs78731604	0.00249775	-0.0066254	0.643867	20544_15	CALCOCO1	0.50041
rs78731604	0.00249775	0.0139124	0.139232	20544_6	CALCOCO1	0.50041
rs78731604	0.00250503	-0.0145941	0.384226	20547_1	CALCOCO1	0.50041
rs78731604	0.00250503	0.00704186	0.519368	20547_3	CALCOCO1	0.50041
rs78731604	0.00250389	-0.0082711	0.528312	20548_2	CALCOCO1	0.50041
rs78731604	0.00254571	-0.00939792	0.526616	20550_1	CALCOCO1	0.50041
rs78731604	0.00271572	-0.00819909	0.54601	2060	CALCOCO1	0.50041
rs78731604	0.00271292	0.00878734	0.528161	2070	CALCOCO1	0.50041
rs78731604	0.00270694	0.014599	0.437666	2080	CALCOCO1	0.50041
rs78731604	0.0027182	0.0119106	0.261931	2090	CALCOCO1	0.50041
rs78731604	0.00270985	0.0286307	0.201178	21001_irnt	CALCOCO1	0.50041
rs78731604	0.00270885	0.0271106	0.171663	21002_irnt	CALCOCO1	0.50041
rs78731604	0.00270885	0.514462	0.106627	21002_raw	CALCOCO1	0.50041
rs78731604	0.0027174	0.00866855	0.229347	2100	CALCOCO1	0.50041
rs78731604	0.0026336	0.0155939	0.683538	21021_irnt	CALCOCO1	0.50041
rs78731604	0.00271093	-0.0505355	0.238878	2110	CALCOCO1	0.50041
rs78731604	0.00272747	-0.0124677	0.591694	2139_irnt	CALCOCO1	0.50041
rs78731604	0.00273761	0.017824	0.3535	2149	CALCOCO1	0.50041
rs78731604	0.00272297	0.00574914	0.179476	2159	CALCOCO1	0.50041
rs78731604	0.00271352	0.025973	0.113191	2178	CALCOCO1	0.50041
rs78731604	0.0027211	-0.00490675	0.6432	2188	CALCOCO1	0.50041
rs78731604	0.00271711	0.0100035	0.116835	2207	CALCOCO1	0.50041
rs78731604	0.00261475	0.00935951	0.624407	22126	CALCOCO1	0.50041
rs78731604	0.00261475	-0.0141593	0.353014	22127	CALCOCO1	0.50041
rs78731604	0.00272675	-0.00218174	0.980703	22146_irnt	CALCOCO1	0.50041
rs78731604	0.00234702	0.0233547	0.856388	22147_irnt	CALCOCO1	0.50041
rs78731604	0.00234702	-0.0524719	0.422167	22167	CALCOCO1	0.50041
rs78731604	0.00274927	-0.0141564	0.5486	2217_irnt	CALCOCO1	0.50041
rs78731604	0.00271566	0.000412135	0.958436	2227	CALCOCO1	0.50041
rs78731604	0.00270746	0.0128302	0.198304	2247_0	CALCOCO1	0.50041
rs78731604	0.00270746	-0.0130983	0.188958	2247_1	CALCOCO1	0.50041
rs78731604	0.00261503	-0.019333	0.307134	22501_irnt	CALCOCO1	0.50041
rs78731604	0.00261475	-0.0278468	0.0762286	22502	CALCOCO1	0.50041
rs78731604	0.00261475	-0.0246686	0.0521075	22504	CALCOCO1	0.50041
rs78731604	0.0026217	-0.0108197	0.618846	22506_113	CALCOCO1	0.50041
rs78731604	0.0026217	0.0119538	0.590441	22506_114	CALCOCO1	0.50041
rs78731604	0.00272047	-0.0141096	0.195784	2257	CALCOCO1	0.50041
rs78731604	0.0026291	-0.00128965	0.937579	22607_0	CALCOCO1	0.50041
rs78731604	0.0026291	0.000465597	0.983783	22607_1	CALCOCO1	0.50041
rs78731604	0.00262472	0.00194328	0.921601	22608_0	CALCOCO1	0.50041
rs78731604	0.00262208	-0.00784538	0.18684	22616_0	CALCOCO1	0.50041
rs78731604	0.00262208	-0.00117962	0.921421	22616_1	CALCOCO1	0.50041
rs78731604	0.00262208	-0.00984007	0.351104	22617_4215	CALCOCO1	0.50041
rs78731604	0.00262208	0.00259626	0.810642	22619_0	CALCOCO1	0.50041
rs78731604	0.00231545	-0.00405292	0.811938	22650_9	CALCOCO1	0.50041
rs78731604	0.00269751	-0.00653726	0.746994	22660_105	CALCOCO1	0.50041
rs78731604	0.00269751	0.0013427	0.935611	22660_108	CALCOCO1	0.50041
rs78731604	0.00270806	-0.0244994	0.210669	2267	CALCOCO1	0.50041
rs78731604	0.00271328	-0.0298379	0.158139	22702_irnt	CALCOCO1	0.50041
rs78731604	0.00271328	-0.0231698	0.231752	22704_irnt	CALCOCO1	0.50041
rs78731604	0.00271545	0.00223393	0.781889	2277	CALCOCO1	0.50041
rs78731604	0.00270324	0.00781913	0.594751	2306	CALCOCO1	0.50041
rs78731604	0.00270405	0.0280342	0.16082	23098_irnt	CALCOCO1	0.50041
rs78731604	0.00270424	0.0170623	0.319138	23099_irnt	CALCOCO1	0.50041
rs78731604	0.00270576	0.0278205	0.207373	23100_irnt	CALCOCO1	0.50041
rs78731604	0.00270428	0.0167435	0.236867	23101_irnt	CALCOCO1	0.50041
rs78731604	0.00270408	0.0172125	0.224885	23102_irnt	CALCOCO1	0.50041
rs78731604	0.0027041	0.0305503	0.176209	23104_irnt	CALCOCO1	0.50041
rs78731604	0.00270415	0.0181016	0.221526	23105_irnt	CALCOCO1	0.50041
rs78731604	0.00270438	-0.0240571	0.164399	23106_irnt	CALCOCO1	0.50041
rs78731604	0.00270421	-0.0289241	0.159391	23107_irnt	CALCOCO1	0.50041
rs78731604	0.00270426	-0.0213817	0.302058	23108_irnt	CALCOCO1	0.50041
rs78731604	0.0027044	-0.0301472	0.0590475	23109_irnt	CALCOCO1	0.50041
rs78731604	0.00270429	-0.0269124	0.093043	23110_irnt	CALCOCO1	0.50041
rs78731604	0.00270426	0.0141636	0.315267	23111_irnt	CALCOCO1	0.50041
rs78731604	0.00270429	0.0249741	0.168068	23112_irnt	CALCOCO1	0.50041
rs78731604	0.00270436	0.0196957	0.174849	23113_irnt	CALCOCO1	0.50041
rs78731604	0.00270436	0.0189382	0.189156	23114_irnt	CALCOCO1	0.50041
rs78731604	0.00270441	0.0175775	0.206807	23115_irnt	CALCOCO1	0.50041
rs78731604	0.00270443	0.0270771	0.130607	23116_irnt	CALCOCO1	0.50041
rs78731604	0.00270456	0.018547	0.203726	23117_irnt	CALCOCO1	0.50041
rs78731604	0.0027046	0.0198351	0.171271	23118_irnt	CALCOCO1	0.50041
rs78731604	0.00270465	0.015225	0.375508	23119_irnt	CALCOCO1	0.50041
rs78731604	0.00270483	0.0257843	0.246799	23120_irnt	CALCOCO1	0.50041
rs78731604	0.00270486	0.0244911	0.0813576	23121_irnt	CALCOCO1	0.50041
rs78731604	0.0027049	0.0251835	0.0722188	23122_irnt	CALCOCO1	0.50041
rs78731604	0.00270505	0.0184643	0.280697	23123_irnt	CALCOCO1	0.50041
rs78731604	0.0027039	0.0331119	0.137114	23124_irnt	CALCOCO1	0.50041
rs78731604	0.00270535	0.0156811	0.274568	23125_irnt	CALCOCO1	0.50041
rs78731604	0.00270546	0.0170516	0.23294	23126_irnt	CALCOCO1	0.50041
rs78731604	0.0027029	0.0164302	0.424223	23127_irnt	CALCOCO1	0.50041
rs78731604	0.00270307	0.0293866	0.195699	23128_irnt	CALCOCO1	0.50041
rs78731604	0.00270217	0.012386	0.382094	23129_irnt	CALCOCO1	0.50041
rs78731604	0.00270244	0.00989118	0.483635	23130_irnt	CALCOCO1	0.50041
rs78731604	0.00271068	-0.00281936	0.760661	2316	CALCOCO1	0.50041
rs78731604	0.00272163	0.00179346	0.827897	2335	CALCOCO1	0.50041
rs78731604	0.00272546	-0.00363441	0.713686	2345	CALCOCO1	0.50041
rs78731604	0.00277975	-0.00607433	0.677453	2365	CALCOCO1	0.50041
rs78731604	0.00273425	-0.00590368	0.687702	2375	CALCOCO1	0.50041
rs78731604	0.00276125	-0.00537799	0.622419	2385	CALCOCO1	0.50041
rs78731604	0.00275281	0.0078795	0.608246	2395_1	CALCOCO1	0.50041
rs78731604	0.00275281	0.00477709	0.73014	2395_2	CALCOCO1	0.50041
rs78731604	0.00275281	-0.0136865	0.34641	2395_3	CALCOCO1	0.50041
rs78731604	0.00275281	0.00102994	0.935559	2395_4	CALCOCO1	0.50041
rs78731604	0.00272553	-0.0197369	0.380246	24003_irnt	CALCOCO1	0.50041
rs78731604	0.00271003	-0.038895	0.0981829	24007_irnt	CALCOCO1	0.50041
rs78731604	0.00272553	-0.0191118	0.400039	24010_irnt	CALCOCO1	0.50041
rs78731604	0.00272553	-0.00781265	0.174749	24014	CALCOCO1	0.50041
rs78731604	0.00272553	-0.00301998	0.893286	24016_irnt	CALCOCO1	0.50041
rs78731604	0.00272553	-0.00760956	0.735389	24017_irnt	CALCOCO1	0.50041
rs78731604	0.00272553	-0.00775071	0.730272	24018_irnt	CALCOCO1	0.50041
rs78731604	0.00272769	0.0183866	0.397292	24019_irnt	CALCOCO1	0.50041
rs78731604	0.00274031	0.0347252	0.195159	2405	CALCOCO1	0.50041
rs78731604	0.0027423	0.00285982	0.856076	2415	CALCOCO1	0.50041
rs78731604	0.00271244	-0.000558339	0.907506	2443	CALCOCO1	0.50041
rs78731604	0.00271542	-0.00709643	0.241763	2453	CALCOCO1	0.50041
rs78731604	0.00271545	-0.00201046	0.763501	2463	CALCOCO1	0.50041
rs78731604	0.00272147	0.000227542	0.980207	2473	CALCOCO1	0.50041
rs78731604	0.00271646	-0.00826865	0.453853	2492	CALCOCO1	0.50041
rs78731604	0.00268499	0.0062133	0.774008	2644	CALCOCO1	0.50041
rs78731604	0.0028144	-0.0102975	0.345441	2654_2	CALCOCO1	0.50041
rs78731604	0.0028144	-0.00636426	0.524543	2654_4	CALCOCO1	0.50041
rs78731604	0.00278663	0.00921458	0.590633	2664_3	CALCOCO1	0.50041
rs78731604	0.00278663	-0.00668378	0.711358	2664_5	CALCOCO1	0.50041
rs78731604	0.00269109	0.00551448	0.832586	2704	CALCOCO1	0.50041
rs78731604	0.00267965	-0.0338269	0.143199	2714	CALCOCO1	0.50041
rs78731604	0.00268102	0.00443771	0.602295	2724	CALCOCO1	0.50041
rs78731604	0.00267393	-0.00819921	0.761959	2744	CALCOCO1	0.50041
rs78731604	0.00271996	-0.0406618	0.266982	2754_irnt	CALCOCO1	0.50041
rs78731604	0.00270853	-0.00855489	0.816599	2764_irnt	CALCOCO1	0.50041
rs78731604	0.00268311	-0.0420849	0.126548	2794_irnt	CALCOCO1	0.50041
rs78731604	0.00269361	-0.00143785	0.916751	2814	CALCOCO1	0.50041
rs78731604	0.00269692	0.00630142	0.457303	2834	CALCOCO1	0.50041
rs78731604	0.00269912	-0.00826058	0.568283	2844	CALCOCO1	0.50041
rs78731604	0.00276831	-0.00110578	0.93659	2877_1	CALCOCO1	0.50041
rs78731604	0.00279435	0.0407546	0.300196	2887	CALCOCO1	0.50041
rs78731604	0.0027804	-0.00605239	0.786778	2907	CALCOCO1	0.50041
rs78731604	0.00278306	0.0388808	0.29361	2926	CALCOCO1	0.50041
rs78731604	0.00249356	-0.0481991	0.212282	2966_irnt	CALCOCO1	0.50041
rs78731604	0.00281455	-0.0586937	0.469566	2976_irnt	CALCOCO1	0.50041
rs78731604	0.00271635	-0.0405672	0.0757707	30000_irnt	CALCOCO1	0.50041
rs78731604	0.00271631	0.0064292	0.742458	30010_irnt	CALCOCO1	0.50041
rs78731604	0.00271632	0.00704797	0.697966	30020_irnt	CALCOCO1	0.50041
rs78731604	0.00271631	0.0121372	0.51559	30030_irnt	CALCOCO1	0.50041
rs78731604	0.00271633	0.00394619	0.862198	30040_irnt	CALCOCO1	0.50041
rs78731604	0.00271634	-0.00392617	0.86257	30050_irnt	CALCOCO1	0.50041
rs78731604	0.00271637	-0.0101705	0.654421	30060_irnt	CALCOCO1	0.50041
rs78731604	0.00271633	-0.0123545	0.587537	30070_irnt	CALCOCO1	0.50041
rs78731604	0.00271632	-0.0232702	0.294089	30080_irnt	CALCOCO1	0.50041
rs78731604	0.00271634	-0.0199727	0.359677	30090_irnt	CALCOCO1	0.50041
rs78731604	0.00271635	0.00871052	0.703829	30100_irnt	CALCOCO1	0.50041
rs78731604	0.00271635	-0.00805867	0.722337	30110_irnt	CALCOCO1	0.50041
rs78731604	0.00271397	-0.0198158	0.384853	30120_irnt	CALCOCO1	0.50041
rs78731604	0.00271397	-0.0262725	0.237076	30130_irnt	CALCOCO1	0.50041
rs78731604	0.00271397	-0.0308904	0.175888	30140_irnt	CALCOCO1	0.50041
rs78731604	0.00271397	0.0132809	0.43157	30150	CALCOCO1	0.50041
rs78731604	0.00271397	-0.0120697	0.532185	30160	CALCOCO1	0.50041
rs78731604	0.00271393	0.00590548	0.79362	30180_irnt	CALCOCO1	0.50041
rs78731604	0.00271393	0.0053214	0.810436	30190_irnt	CALCOCO1	0.50041
rs78731604	0.00271393	-0.00474029	0.835418	30200_irnt	CALCOCO1	0.50041
rs78731604	0.00271393	0.0221138	0.333068	30210_irnt	CALCOCO1	0.50041
rs78731604	0.00271393	0.0237909	0.299973	30220_irnt	CALCOCO1	0.50041
rs78731604	0.00271373	0.0356599	0.122547	30240_irnt	CALCOCO1	0.50041
rs78731604	0.00271373	0.0372671	0.102124	30250_irnt	CALCOCO1	0.50041
rs78731604	0.00271373	0.00575045	0.802411	30260_irnt	CALCOCO1	0.50041
rs78731604	0.00271373	-0.0128068	0.577693	30270_irnt	CALCOCO1	0.50041
rs78731604	0.00271373	0.00792675	0.73113	30280_irnt	CALCOCO1	0.50041
rs78731604	0.00271373	0.0261232	0.257971	30290_irnt	CALCOCO1	0.50041
rs78731604	0.00271373	0.0277468	0.226147	30300_irnt	CALCOCO1	0.50041
rs78731604	0.00260795	-0.0096513	0.817197	30500_irnt	CALCOCO1	0.50041
rs78731604	0.00271941	0.0257755	0.229509	30510_irnt	CALCOCO1	0.50041
rs78731604	0.00271816	-0.000391698	0.986221	30520_irnt	CALCOCO1	0.50041
rs78731604	0.0027181	0.0359918	0.102885	30530_irnt	CALCOCO1	0.50041
rs78731604	0.00269881	0.00118114	0.945025	3062_irnt	CALCOCO1	0.50041
rs78731604	0.00269881	0.0102789	0.55796	3063_irnt	CALCOCO1	0.50041
rs78731604	0.00269881	0.0047636	0.803825	3064_irnt	CALCOCO1	0.50041
rs78731604	0.002739	-0.00118154	0.379213	3082	CALCOCO1	0.50041
rs78731604	0.00270586	0.0265462	0.3033	3143_irnt	CALCOCO1	0.50041
rs78731604	0.00270603	-0.0145656	0.607784	3144_irnt	CALCOCO1	0.50041
rs78731604	0.00270586	-0.0280812	0.331485	3147_irnt	CALCOCO1	0.50041
rs78731604	0.00270465	-0.0259995	0.368595	3148_irnt	CALCOCO1	0.50041
rs78731604	0.00268055	0.00132245	0.83341	3393	CALCOCO1	0.50041
rs78731604	0.00293445	-0.0012635	0.952116	3404	CALCOCO1	0.50041
rs78731604	0.00290807	-0.00112011	0.966991	3414	CALCOCO1	0.50041
rs78731604	0.00274183	0.0315612	0.604858	3456	CALCOCO1	0.50041
rs78731604	0.00273471	-0.161162	0.103049	3466	CALCOCO1	0.50041
rs78731604	0.0027465	-0.0169174	0.825636	3476	CALCOCO1	0.50041
rs78731604	0.00279447	-0.0224193	0.416205	3526_irnt	CALCOCO1	0.50041
rs78731604	0.00275992	0.0527832	0.276625	3536_irnt	CALCOCO1	0.50041
rs78731604	0.00272867	0.00404909	0.917581	3581_irnt	CALCOCO1	0.50041
rs78731604	0.00269816	-0.0017623	0.841613	3591	CALCOCO1	0.50041
rs78731604	0.00269268	-0.0914532	0.0252062	3637	CALCOCO1	0.50041
rs78731604	0.00324279	-0.0453712	0.248016	3731	CALCOCO1	0.50041
rs78731604	0.00274144	-0.0124153	0.65273	3751	CALCOCO1	0.50041
rs78731604	0.00281731	-0.0286926	0.54609	3761_irnt	CALCOCO1	0.50041
rs78731604	0.00273305	0.0811222	0.212453	3786_irnt	CALCOCO1	0.50041
rs78731604	0.00267879	0.0499068	0.0501889	3799	CALCOCO1	0.50041
rs78731604	0.00271566	-0.0163009	0.463991	399_irnt	CALCOCO1	0.50041
rs78731604	0.00269592	-0.0596316	0.101832	40009	CALCOCO1	0.50041
rs78731604	0.00271326	-0.0307631	0.153458	400_irnt	CALCOCO1	0.50041
rs78731604	0.00271548	-0.0290015	0.17227	404_irnt	CALCOCO1	0.50041
rs78731604	0.00273252	0.0155073	0.495307	4079_irnt	CALCOCO1	0.50041
rs78731604	0.00273255	0.00821787	0.702746	4080_irnt	CALCOCO1	0.50041
rs78731604	0.00263893	0.0750283	0.033017	4100_irnt	CALCOCO1	0.50041
rs78731604	0.00263904	-0.0273283	0.476526	4101_irnt	CALCOCO1	0.50041
rs78731604	0.00263893	-0.0303824	0.437807	4104_irnt	CALCOCO1	0.50041
rs78731604	0.00264051	-0.0332544	0.395486	4105_irnt	CALCOCO1	0.50041
rs78731604	0.00263893	-0.0303638	0.438086	4106_irnt	CALCOCO1	0.50041
rs78731604	0.00263057	0.0724796	0.0426424	4119_irnt	CALCOCO1	0.50041
rs78731604	0.00263068	0.0154106	0.68706	4120_irnt	CALCOCO1	0.50041
rs78731604	0.00271322	-0.0136399	0.176213	41231_1	CALCOCO1	0.50041
rs78731604	0.00267037	0.0266081	0.236929	41235	CALCOCO1	0.50041
rs78731604	0.00263057	-0.00387501	0.921003	4123_irnt	CALCOCO1	0.50041
rs78731604	0.0027084	-0.0159155	0.136133	41248_1000	CALCOCO1	0.50041
rs78731604	0.0027084	0.0015281	0.671367	41248_1001	CALCOCO1	0.50041
rs78731604	0.0027084	0.00189862	0.474458	41248_5001	CALCOCO1	0.50041
rs78731604	0.00262326	0.00743186	0.849333	4124_irnt	CALCOCO1	0.50041
rs78731604	0.00263057	-0.00386615	0.921183	4125_irnt	CALCOCO1	0.50041
rs78731604	0.00264619	0.0479738	0.226642	4194_irnt	CALCOCO1	0.50041
rs78731604	0.00264619	0.0244137	0.520658	4195_irnt	CALCOCO1	0.50041
rs78731604	0.00264339	-0.0139221	0.718891	4196_irnt	CALCOCO1	0.50041
rs78731604	0.00267574	0.0677966	0.0794522	4230_irnt	CALCOCO1	0.50041
rs78731604	0.00267419	0.0171222	0.661716	4233_irnt	CALCOCO1	0.50041
rs78731604	0.00268083	-0.695523	0.411375	4277	CALCOCO1	0.50041
rs78731604	0.00242653	-0.029067	0.591957	4282	CALCOCO1	0.50041
rs78731604	0.00266017	-0.0291346	0.449836	4288_irnt	CALCOCO1	0.50041
rs78731604	0.00266017	0.0341846	0.362715	4290_irnt	CALCOCO1	0.50041
rs78731604	0.00266017	-0.0119581	0.446173	4291	CALCOCO1	0.50041
rs78731604	0.00266479	0.00180591	0.920111	4501	CALCOCO1	0.50041
rs78731604	0.00267214	0.0613624	0.074679	4548	CALCOCO1	0.50041
rs78731604	0.00265489	0.0291235	0.319692	4570	CALCOCO1	0.50041
rs78731604	0.00265919	0.0221651	0.261661	4598	CALCOCO1	0.50041
rs78731604	0.00267489	0.0306344	0.111965	4631	CALCOCO1	0.50041
rs78731604	0.00264573	0.00983579	0.518914	4653	CALCOCO1	0.50041
rs78731604	0.00266974	-0.00117152	0.964432	4674	CALCOCO1	0.50041
rs78731604	0.00270222	-0.011089	0.478399	46_irnt	CALCOCO1	0.50041
rs78731604	0.00268281	0.0268011	0.100202	4728	CALCOCO1	0.50041
rs78731604	0.00271037	-0.0137255	0.380602	47_irnt	CALCOCO1	0.50041
rs78731604	0.00263823	-0.00447146	0.805471	4803_0	CALCOCO1	0.50041
rs78731604	0.00263823	-0.0012599	0.898477	4803_11	CALCOCO1	0.50041
rs78731604	0.00265609	0.0161555	0.682045	4825	CALCOCO1	0.50041
rs78731604	0.00270964	0.0308386	0.120166	48_irnt	CALCOCO1	0.50041
rs78731604	0.00265682	-0.00153162	0.670934	4946	CALCOCO1	0.50041
rs78731604	0.00265805	0.0303023	0.0363945	4957	CALCOCO1	0.50041
rs78731604	0.00265364	-0.0215824	0.132995	4968	CALCOCO1	0.50041
rs78731604	0.00257876	0.00822062	0.683132	4990	CALCOCO1	0.50041
rs78731604	0.00270858	0.00567439	0.801758	49_irnt	CALCOCO1	0.50041
rs78731604	0.00256031	-0.0247017	0.120073	5001	CALCOCO1	0.50041
rs78731604	0.00252338	-0.0123519	0.609896	5012	CALCOCO1	0.50041
rs78731604	0.00272495	-0.0264433	0.578618	5084_irnt	CALCOCO1	0.50041
rs78731604	0.00273351	-0.00289021	0.951698	5085_irnt	CALCOCO1	0.50041
rs78731604	0.00273351	-0.0868649	0.0699825	5086_irnt	CALCOCO1	0.50041
rs78731604	0.00272495	-0.0959794	0.0448514	5087_irnt	CALCOCO1	0.50041
rs78731604	0.00273351	-0.0102721	0.832561	5089_irnt	CALCOCO1	0.50041
rs78731604	0.00273217	-0.0200978	0.676496	5096_irnt	CALCOCO1	0.50041
rs78731604	0.00266968	-0.0256631	0.62254	5097_irnt	CALCOCO1	0.50041
rs78731604	0.00272428	-0.0429541	0.403371	5098_irnt	CALCOCO1	0.50041
rs78731604	0.00270521	-0.0120678	0.803353	5099_irnt	CALCOCO1	0.50041
rs78731604	0.00271097	-0.000371819	0.981289	50_irnt	CALCOCO1	0.50041
rs78731604	0.00270521	0.126244	0.0109023	5100_irnt	CALCOCO1	0.50041
rs78731604	0.00273217	0.123405	0.0124306	5104_irnt	CALCOCO1	0.50041
rs78731604	0.00266968	0.0857567	0.109384	5105_irnt	CALCOCO1	0.50041
rs78731604	0.00272428	-0.0690749	0.190413	5106_irnt	CALCOCO1	0.50041
rs78731604	0.00270521	-0.118034	0.0172857	5107_irnt	CALCOCO1	0.50041
rs78731604	0.00276637	0.0288341	0.663288	5109_irnt	CALCOCO1	0.50041
rs78731604	0.00276528	-0.0177118	0.790949	5110_irnt	CALCOCO1	0.50041
rs78731604	0.00275001	0.0576449	0.24642	5111_irnt	CALCOCO1	0.50041
rs78731604	0.00270553	0.125664	0.0112721	5115_irnt	CALCOCO1	0.50041
rs78731604	0.00270521	0.0541414	0.273209	5116_irnt	CALCOCO1	0.50041
rs78731604	0.00272428	0.00154628	0.976591	5117_irnt	CALCOCO1	0.50041
rs78731604	0.00266968	0.00415823	0.937992	5118_irnt	CALCOCO1	0.50041
rs78731604	0.00273217	0.0283046	0.564653	5119_irnt	CALCOCO1	0.50041
rs78731604	0.00270521	-0.0315671	0.514336	5132_irnt	CALCOCO1	0.50041
rs78731604	0.00272428	-0.0299337	0.559996	5133_irnt	CALCOCO1	0.50041
rs78731604	0.00266968	-0.0444249	0.393122	5134_irnt	CALCOCO1	0.50041
rs78731604	0.00273217	-0.0429747	0.371494	5135_irnt	CALCOCO1	0.50041
rs78731604	0.00275001	-0.0196519	0.69151	5156_irnt	CALCOCO1	0.50041
rs78731604	0.00276528	0.000295511	0.996468	5157_irnt	CALCOCO1	0.50041
rs78731604	0.00276637	-0.00623699	0.924859	5158_irnt	CALCOCO1	0.50041
rs78731604	0.00276413	-0.0592149	0.367551	5162_irnt	CALCOCO1	0.50041
rs78731604	0.0027496	0.0578262	0.236216	5163_irnt	CALCOCO1	0.50041
rs78731604	0.00273679	-0.00327401	0.055562	5182_1	CALCOCO1	0.50041
rs78731604	0.00272407	0.00162893	0.97223	5201_irnt	CALCOCO1	0.50041
rs78731604	0.00274486	-0.0120179	0.796934	5208_irnt	CALCOCO1	0.50041
rs78731604	0.00272428	0.00215284	0.954093	5251	CALCOCO1	0.50041
rs78731604	0.00270129	0.0549386	0.259077	5254_irnt	CALCOCO1	0.50041
rs78731604	0.00270129	0.0637107	0.19449	5255_irnt	CALCOCO1	0.50041
rs78731604	0.00270129	0.006869	0.887614	5256_irnt	CALCOCO1	0.50041
rs78731604	0.00270129	0.0366684	0.454813	5257_irnt	CALCOCO1	0.50041
rs78731604	0.00269899	0.0233215	0.631594	5262_irnt	CALCOCO1	0.50041
rs78731604	0.00269899	0.0635625	0.195521	5263_irnt	CALCOCO1	0.50041
rs78731604	0.00269899	0.0371373	0.44565	5264_irnt	CALCOCO1	0.50041
rs78731604	0.00269899	0.0615806	0.210305	5265_irnt	CALCOCO1	0.50041
rs78731604	0.00273217	-0.0284059	0.332232	5292	CALCOCO1	0.50041
rs78731604	0.00303323	-0.0345489	0.592261	5386	CALCOCO1	0.50041
rs78731604	0.00302312	0.00834753	0.835439	5485	CALCOCO1	0.50041
rs78731604	0.00299332	-0.00158664	0.850848	5540_0	CALCOCO1	0.50041
rs78731604	0.0027614	-0.036973	0.52	5983_irnt	CALCOCO1	0.50041
rs78731604	0.0027673	-0.0310524	0.476527	5984_irnt	CALCOCO1	0.50041
rs78731604	0.00275936	-0.0382224	0.45407	5986_irnt	CALCOCO1	0.50041
rs78731604	0.00275936	-0.0220773	0.620608	6032_irnt	CALCOCO1	0.50041
rs78731604	0.00276008	-0.0293703	0.603047	6033_irnt	CALCOCO1	0.50041
rs78731604	0.00273769	-0.00636024	0.712467	6070_6	CALCOCO1	0.50041
rs78731604	0.00275636	-0.0133385	0.444177	6072_6	CALCOCO1	0.50041
rs78731604	0.00271991	-0.00345475	0.673846	6138_100	CALCOCO1	0.50041
rs78731604	0.00271991	-0.0187969	0.0728514	6138_1	CALCOCO1	0.50041
rs78731604	0.00271991	-0.0128695	0.196871	6138_2	CALCOCO1	0.50041
rs78731604	0.00271991	-0.010866	0.328092	6138_3	CALCOCO1	0.50041
rs78731604	0.00271991	0.01026	0.157829	6138_4	CALCOCO1	0.50041
rs78731604	0.00271991	0.00829135	0.34106	6138_5	CALCOCO1	0.50041
rs78731604	0.00271991	-0.00861377	0.402594	6138_6	CALCOCO1	0.50041
rs78731604	0.00271756	-0.00804115	0.466444	6139_2	CALCOCO1	0.50041
rs78731604	0.00272244	0.0136047	0.168335	6141_1	CALCOCO1	0.50041
rs78731604	0.00271441	0.00540498	0.477298	6142_2	CALCOCO1	0.50041
rs78731604	0.00271441	0.00521147	0.22702	6142_4	CALCOCO1	0.50041
rs78731604	0.00271441	-0.00129826	0.644514	6142_5	CALCOCO1	0.50041
rs78731604	0.00271441	0.00209891	0.622045	6142_6	CALCOCO1	0.50041
rs78731604	0.00268823	-0.00596954	0.632249	6143_1	CALCOCO1	0.50041
rs78731604	0.00268823	0.0219656	0.053343	6143_2	CALCOCO1	0.50041
rs78731604	0.00268823	0.0153975	0.222929	6143_3	CALCOCO1	0.50041
rs78731604	0.00268823	0.00371308	0.654385	6143_4	CALCOCO1	0.50041
rs78731604	0.00271835	-0.00110741	0.760991	6144_3	CALCOCO1	0.50041
rs78731604	0.00271835	-0.0196381	0.0245105	6144_4	CALCOCO1	0.50041
rs78731604	0.00271835	0.0282803	0.00257294	6144_5	CALCOCO1	0.50041
rs78731604	0.00270318	-0.00245498	0.826652	6145_100	CALCOCO1	0.50041
rs78731604	0.00270318	-0.00602162	0.395463	6145_6	CALCOCO1	0.50041
rs78731604	0.00270917	-0.0105104	0.0463686	6146_100	CALCOCO1	0.50041
rs78731604	0.00270917	0.0093414	0.0439387	6146_2	CALCOCO1	0.50041
rs78731604	0.00270917	0.00811233	0.0526493	6146_3	CALCOCO1	0.50041
rs78731604	0.00271902	0.00306753	0.619454	6147_1	CALCOCO1	0.50041
rs78731604	0.00271902	0.00744566	0.0995348	6147_2	CALCOCO1	0.50041
rs78731604	0.00271902	-0.00692723	0.275229	6147_3	CALCOCO1	0.50041
rs78731604	0.00271902	-0.00491235	0.181301	6147_4	CALCOCO1	0.50041
rs78731604	0.00276529	-0.0123879	0.433937	6148_100	CALCOCO1	0.50041
rs78731604	0.00276529	0.00944692	0.233788	6148_2	CALCOCO1	0.50041
rs78731604	0.00276529	-0.000530313	0.962343	6148_4	CALCOCO1	0.50041
rs78731604	0.00276529	-0.00105607	0.906679	6148_6	CALCOCO1	0.50041
rs78731604	0.00271926	0.00308659	0.77848	6149_100	CALCOCO1	0.50041
rs78731604	0.00271926	0.0135021	0.0486806	6149_1	CALCOCO1	0.50041
rs78731604	0.00271926	-0.0149817	0.0470964	6149_3	CALCOCO1	0.50041
rs78731604	0.00271926	-0.000499101	0.910217	6149_4	CALCOCO1	0.50041
rs78731604	0.00271926	-0.000219097	0.978479	6149_6	CALCOCO1	0.50041
rs78731604	0.00271628	0.0189535	0.0568881	6150_100	CALCOCO1	0.50041
rs78731604	0.00271628	-0.00116058	0.728882	6150_1	CALCOCO1	0.50041
rs78731604	0.00271628	0.00175098	0.653705	6150_2	CALCOCO1	0.50041
rs78731604	0.00271628	-0.0199669	0.0408897	6150_4	CALCOCO1	0.50041
rs78731604	0.00271578	-0.00203824	0.445433	6151_1	CALCOCO1	0.50041
rs78731604	0.00271578	0.00110684	0.726767	6151_5	CALCOCO1	0.50041
rs78731604	0.00271578	-0.00449439	0.37238	6151_7	CALCOCO1	0.50041
rs78731604	0.00271686	-0.00105747	0.920043	6152_100	CALCOCO1	0.50041
rs78731604	0.00271686	-0.0024382	0.446089	6152_5	CALCOCO1	0.50041
rs78731604	0.00271686	-0.00396044	0.175031	6152_6	CALCOCO1	0.50041
rs78731604	0.00271686	0.00100099	0.889757	6152_8	CALCOCO1	0.50041
rs78731604	0.00271686	0.0101277	0.284989	6152_9	CALCOCO1	0.50041
rs78731604	0.00268965	0.000964449	0.945442	6153_100	CALCOCO1	0.50041
rs78731604	0.00268965	-0.00742611	0.456239	6153_1	CALCOCO1	0.50041
rs78731604	0.00268965	-0.00335413	0.768231	6153_2	CALCOCO1	0.50041
rs78731604	0.00268965	0.00442113	0.586645	6153_4	CALCOCO1	0.50041
rs78731604	0.00272485	0.00564608	0.614653	6154_100	CALCOCO1	0.50041
rs78731604	0.00272485	-0.00415628	0.586384	6154_1	CALCOCO1	0.50041
rs78731604	0.00272485	-0.00688722	0.387963	6154_2	CALCOCO1	0.50041
rs78731604	0.00272485	-0.00090722	0.922245	6154_3	CALCOCO1	0.50041
rs78731604	0.00272485	0.00312875	0.313851	6154_4	CALCOCO1	0.50041
rs78731604	0.00272485	0.00167127	0.755487	6154_5	CALCOCO1	0.50041
rs78731604	0.00271959	-0.000273754	0.9791	6155_100	CALCOCO1	0.50041
rs78731604	0.00271959	-0.000877329	0.787623	6155_6	CALCOCO1	0.50041
rs78731604	0.00271959	0.000831266	0.928693	6155_7	CALCOCO1	0.50041
rs78731604	0.00276221	-0.017767	0.127456	6157_2	CALCOCO1	0.50041
rs78731604	0.00276221	0.0137845	0.528114	6157_3	CALCOCO1	0.50041
rs78731604	0.00271372	-0.00469669	0.672094	6159_100	CALCOCO1	0.50041
rs78731604	0.00271372	-0.00296738	0.73878	6159_1	CALCOCO1	0.50041
rs78731604	0.00271372	0.01843	0.05211	6159_3	CALCOCO1	0.50041
rs78731604	0.00271372	0.0024293	0.805014	6159_4	CALCOCO1	0.50041
rs78731604	0.00271372	0.00674538	0.343197	6159_6	CALCOCO1	0.50041
rs78731604	0.00271372	0.0199207	0.0310199	6159_7	CALCOCO1	0.50041
rs78731604	0.00271372	0.000175049	0.949825	6159_8	CALCOCO1	0.50041
rs78731604	0.0027148	0.0109488	0.29138	6160_100	CALCOCO1	0.50041
rs78731604	0.0027148	-0.00673743	0.515167	6160_1	CALCOCO1	0.50041
rs78731604	0.0027148	-0.00265566	0.787956	6160_2	CALCOCO1	0.50041
rs78731604	0.0027148	0.00172312	0.827283	6160_3	CALCOCO1	0.50041
rs78731604	0.0027148	0.00965997	0.0960805	6160_4	CALCOCO1	0.50041
rs78731604	0.0027148	-0.00556282	0.548714	6160_5	CALCOCO1	0.50041
rs78731604	0.00271065	0.00617765	0.498765	6162_1	CALCOCO1	0.50041
rs78731604	0.00271065	-0.012757	0.259542	6162_2	CALCOCO1	0.50041
rs78731604	0.00271065	-0.0105385	0.300743	6162_3	CALCOCO1	0.50041
rs78731604	0.00271065	-0.00702845	0.227895	6162_4	CALCOCO1	0.50041
rs78731604	0.00271111	0.000289773	0.956735	6164_100	CALCOCO1	0.50041
rs78731604	0.00271111	-0.000909985	0.928604	6164_1	CALCOCO1	0.50041
rs78731604	0.00271111	0.000100853	0.992845	6164_2	CALCOCO1	0.50041
rs78731604	0.00271111	-0.00307295	0.648975	6164_3	CALCOCO1	0.50041
rs78731604	0.00271111	-0.00972797	0.388507	6164_4	CALCOCO1	0.50041
rs78731604	0.00271111	-0.000568337	0.958674	6164_5	CALCOCO1	0.50041
rs78731604	0.00273981	0.0246659	0.0935681	6177_100	CALCOCO1	0.50041
rs78731604	0.00273981	-0.0232494	0.0812177	6177_1	CALCOCO1	0.50041
rs78731604	0.00273981	-0.00693155	0.613838	6177_2	CALCOCO1	0.50041
rs78731604	0.00271238	0.000727613	0.947014	6179_100	CALCOCO1	0.50041
rs78731604	0.00271238	-0.00290108	0.779423	6179_1	CALCOCO1	0.50041
rs78731604	0.00271238	-0.00127296	0.885387	6179_2	CALCOCO1	0.50041
rs78731604	0.00271238	-0.00886222	0.110777	6179_3	CALCOCO1	0.50041
rs78731604	0.00271238	0.0106112	0.0167733	6179_4	CALCOCO1	0.50041
rs78731604	0.00272017	-0.00598478	0.356366	670_1	CALCOCO1	0.50041
rs78731604	0.00272017	0.00853107	0.180115	670_2	CALCOCO1	0.50041
rs78731604	0.00273054	-0.00714418	0.463712	680_1	CALCOCO1	0.50041
rs78731604	0.00273054	0.00223927	0.659435	680_3	CALCOCO1	0.50041
rs78731604	0.00271343	-0.0229937	0.275473	699_irnt	CALCOCO1	0.50041
rs78731604	0.00272053	0.0110034	0.56493	728	CALCOCO1	0.50041
rs78731604	0.00273287	-0.00525664	0.843469	738	CALCOCO1	0.50041
rs78731604	0.00266431	0.00800438	0.77119	767_irnt	CALCOCO1	0.50041
rs78731604	0.00270586	-0.0280668	0.331733	78_irnt	CALCOCO1	0.50041
rs78731604	0.00266643	-0.0539908	0.105962	806	CALCOCO1	0.50041
rs78731604	0.00266341	-0.0515788	0.049763	816	CALCOCO1	0.50041
rs78731604	0.0026638	-0.053046	0.0341027	826	CALCOCO1	0.50041
rs78731604	0.00279779	0.0174139	0.413065	845	CALCOCO1	0.50041
rs78731604	0.00269836	-0.0617245	0.160461	864	CALCOCO1	0.50041
rs78731604	0.00268456	-0.0109083	0.657098	874_irnt	CALCOCO1	0.50041
rs78731604	0.00271993	-0.0873297	0.104188	884	CALCOCO1	0.50041
rs78731604	0.00270063	0.0222671	0.307721	894	CALCOCO1	0.50041
rs78731604	0.00269556	-0.0669003	0.13655	904	CALCOCO1	0.50041
rs78731604	0.00268604	-0.0316935	0.302181	914_irnt	CALCOCO1	0.50041
rs78731604	0.0023177	-0.114074	0.141873	93_irnt	CALCOCO1	0.50041
rs78731604	0.00270882	-0.0374108	0.202686	943	CALCOCO1	0.50041
rs78731604	0.00269926	-0.0634183	0.110788	971	CALCOCO1	0.50041
rs78731604	0.00270081	0.0338379	0.390477	981	CALCOCO1	0.50041
rs78731604	0.00271322	0.284094	0.116077	age	CALCOCO1	0.50041
rs78731604	0.00271322	0.00458531	0.367205	ASTHMA_MEDICATIO_COMORB	CALCOCO1	0.50041
rs78731604	0.00271322	-0.00588978	0.102639	C3_BREAST_3	CALCOCO1	0.50041
rs78731604	0.00271322	0.000612363	0.827236	C3_DIGESTIVE_ORGANS	CALCOCO1	0.50041
rs78731604	0.00271322	0.000105429	0.972029	C3_MALE_GENITAL	CALCOCO1	0.50041
rs78731604	0.00271322	0.00832821	0.0579761	C3_OTHER_SKIN	CALCOCO1	0.50041
rs78731604	0.00271322	-0.000111238	0.969398	C3_PROSTATE	CALCOCO1	0.50041
rs78731604	0.00271322	0.0106392	0.0234324	C3_SKIN	CALCOCO1	0.50041
rs78731604	0.00271322	0.00307525	0.394562	C44	CALCOCO1	0.50041
rs78731604	0.00271322	-0.00507425	0.137799	C50	CALCOCO1	0.50041
rs78731604	0.00271322	0.00119338	0.730757	CARDIAC_ARRHYTM	CALCOCO1	0.50041
rs78731604	0.00271322	-0.00588978	0.102639	C_BREAST_3	CALCOCO1	0.50041
rs78731604	0.00271322	0.000612363	0.827236	C_DIGESTIVE_ORGANS	CALCOCO1	0.50041
rs78731604	0.00271322	0.000105429	0.972029	C_MALE_GENITAL	CALCOCO1	0.50041
rs78731604	0.00271322	-0.00216116	0.538413	COLITNONINFNAS	CALCOCO1	0.50041
rs78731604	0.00271322	0.00686263	0.244876	COPD_EXCL	CALCOCO1	0.50041
rs78731604	0.00271322	0.00832821	0.0579761	C_OTHER_SKIN	CALCOCO1	0.50041
rs78731604	0.00271322	0.000729967	0.838513	COX_ARTHROSIS	CALCOCO1	0.50041
rs78731604	0.00271322	-0.000111238	0.969398	C_PROSTATE	CALCOCO1	0.50041
rs78731604	0.00271322	0.0106392	0.0234324	C_SKIN	CALCOCO1	0.50041
rs78731604	0.00271322	-0.00162939	0.576029	C_STROKE	CALCOCO1	0.50041
rs78731604	0.00271322	0.00229391	0.528831	D12	CALCOCO1	0.50041
rs78731604	0.00271322	-0.00207974	0.453807	D25	CALCOCO1	0.50041
rs78731604	0.00271322	0.00397322	0.252236	G56	CALCOCO1	0.50041
rs78731604	0.00271322	0.00303794	0.359734	G6_CARPTU	CALCOCO1	0.50041
rs78731604	0.00271322	0.00456916	0.236737	G6_NERPLEX	CALCOCO1	0.50041
rs78731604	0.00271322	0.00211207	0.489098	H25	CALCOCO1	0.50041
rs78731604	0.00271322	0.00507811	0.204441	H26	CALCOCO1	0.50041
rs78731604	0.00271322	0.00497108	0.291726	H7_LENS	CALCOCO1	0.50041
rs78731604	0.00271322	-0.000740263	0.81235	I20	CALCOCO1	0.50041
rs78731604	0.00271322	-0.00227436	0.443236	I21	CALCOCO1	0.50041
rs78731604	0.00271322	-0.00146145	0.729574	I25	CALCOCO1	0.50041
rs78731604	0.00271322	-0.00119464	0.694665	I48	CALCOCO1	0.50041
rs78731604	0.00271322	0.000709685	0.839812	I83	CALCOCO1	0.50041
rs78731604	0.00271322	0.00789821	0.0576794	I84	CALCOCO1	0.50041
rs78731604	0.00271322	-0.002285	0.536961	I9_CHD_NOREV	CALCOCO1	0.50041
rs78731604	0.00271322	-0.002285	0.536961	I9_CHD	CALCOCO1	0.50041
rs78731604	0.00271322	-0.0020663	0.633494	I9_CORATHER	CALCOCO1	0.50041
rs78731604	0.00271322	0.000676551	0.866601	I9_DISVEINLYMPH	CALCOCO1	0.50041
rs78731604	0.00271322	0.0020139	0.696519	I9_IHD	CALCOCO1	0.50041
rs78731604	0.00271322	-0.00092659	0.764837	I9_MI	CALCOCO1	0.50041
rs78731604	0.00271322	-0.00092659	0.764837	I9_MI_STRICT	CALCOCO1	0.50041
rs78731604	0.00271322	-0.00366751	0.148581	I9_VTE	CALCOCO1	0.50041
rs78731604	0.00271322	-0.00868499	0.347112	ICDMAIN_ANY_ENTRY	CALCOCO1	0.50041
rs78731604	0.00271322	0.00125626	0.735795	III_BLOOD_IMMUN	CALCOCO1	0.50041
rs78731604	0.00271322	-0.00480629	0.586739	II_NEOPLASM	CALCOCO1	0.50041
rs78731604	0.00271322	0.00686263	0.244876	ILD_DIFF_DG	CALCOCO1	0.50041
rs78731604	0.00271322	-0.00403146	0.202609	IV_ENDOCRIN_NUTRIT	CALCOCO1	0.50041
rs78731604	0.00271322	-0.00516308	0.533006	IX_CIRCULATORY	CALCOCO1	0.50041
rs78731604	0.00271322	0.00536594	0.216498	K11_GALLBILPANC	CALCOCO1	0.50041
rs78731604	0.00271322	0.00789488	0.172347	K11_HERNIA	CALCOCO1	0.50041
rs78731604	0.00271322	0.000464237	0.882098	K11_OTHDIG	CALCOCO1	0.50041
rs78731604	0.00271322	0.00745555	0.0735956	K40	CALCOCO1	0.50041
rs78731604	0.00271322	-0.00065456	0.877147	K57	CALCOCO1	0.50041
rs78731604	0.00271322	0.00122287	0.720775	K63	CALCOCO1	0.50041
rs78731604	0.00271322	0.002064	0.593263	K80	CALCOCO1	0.50041
rs78731604	0.00271322	0.00222101	0.580174	KNEE_ARTHROSIS	CALCOCO1	0.50041
rs78731604	0.00271322	0.00224888	0.462591	L72	CALCOCO1	0.50041
rs78731604	0.00271322	0.00755141	0.183303	M13_ARTHROSIS	CALCOCO1	0.50041
rs78731604	0.00271322	0.00239682	0.491688	M13_DORSALGIA	CALCOCO1	0.50041
rs78731604	0.00271322	-0.00172216	0.526952	M13_HALLUXVALGUS	CALCOCO1	0.50041
rs78731604	0.00271322	-0.00506044	0.189022	M13_MENISCUSDERANGEMENTS	CALCOCO1	0.50041
rs78731604	0.00271322	-0.006462	0.27935	M13_OTHERJOINT	CALCOCO1	0.50041
rs78731604	0.00271322	-0.000402208	0.898927	M13_SOFTTISSUEOTH	CALCOCO1	0.50041
rs78731604	0.00271322	0.000729967	0.838513	M16	CALCOCO1	0.50041
rs78731604	0.00271322	0.00222101	0.580174	M17	CALCOCO1	0.50041
rs78731604	0.00271322	-0.00420584	0.20183	M20	CALCOCO1	0.50041
rs78731604	0.00271322	-0.0053597	0.186505	M23	CALCOCO1	0.50041
rs78731604	0.00271322	0.00239682	0.491688	M54	CALCOCO1	0.50041
rs78731604	0.00271322	-0.000402208	0.898927	M79	CALCOCO1	0.50041
rs78731604	0.00271322	-0.00241541	0.533665	N39	CALCOCO1	0.50041
rs78731604	0.00271322	-0.00354339	0.180463	N40	CALCOCO1	0.50041
rs78731604	0.00271322	0.000267105	0.933566	N81	CALCOCO1	0.50041
rs78731604	0.00271322	0.00322976	0.296648	N84	CALCOCO1	0.50041
rs78731604	0.00271322	0.00357241	0.28783	N92	CALCOCO1	0.50041
rs78731604	0.00271322	0.00772641	0.142529	PULM_MEDICATIO_COMORB	CALCOCO1	0.50041
rs78731604	0.00271322	0.00553838	0.336813	PULMONARYDG	CALCOCO1	0.50041
rs78731604	0.00271322	0.00971573	0.0892049	R07	CALCOCO1	0.50041
rs78731604	0.00271322	0.00496507	0.342761	R10	CALCOCO1	0.50041
rs78731604	0.00271322	-0.00575354	0.14524	R31	CALCOCO1	0.50041
rs78731604	0.00271322	0.00137259	0.686538	R69	CALCOCO1	0.50041
rs78731604	0.00271322	-0.00211211	0.428835	S52	CALCOCO1	0.50041
rs78731604	0.00271322	0.00288369	0.63813	VII_EYE_ADNEXA	CALCOCO1	0.50041
rs78731604	0.00271322	0.0130336	0.0143982	VI_NERVOUS	CALCOCO1	0.50041
rs78731604	0.00271322	0.0140932	0.177146	XI_DIGESTIVE	CALCOCO1	0.50041
rs78731604	0.00271322	-0.00782358	0.395108	XIII_MUSCULOSKELET	CALCOCO1	0.50041
rs78731604	0.00271322	0.00295392	0.619453	XII_SKIN_SUBCUTAN	CALCOCO1	0.50041
rs78731604	0.00271322	0.00467982	0.598241	XIV_GENITOURINARY	CALCOCO1	0.50041
rs78731604	0.00271322	-0.00912597	0.220094	XIX_INJURY_POISON	CALCOCO1	0.50041
rs78731604	0.00271322	0.00553838	0.336813	X_RESPIRATORY	CALCOCO1	0.50041
rs78731604	0.00271322	0.00387096	0.697743	XVIII_MISCFINDINGS	CALCOCO1	0.50041
rs144441243	0.00719282	-0.00359994	0.922307	100002_irnt	PGM3	0.505686
rs144441243	0.00719282	-0.0159739	0.671896	100011_irnt	PGM3	0.505686
rs144441243	0.00719282	-0.017503	0.644011	100012_irnt	PGM3	0.505686
rs144441243	0.00719282	-0.0404604	0.199044	100022	PGM3	0.505686
rs144441243	0.00719282	-0.0212727	0.575316	100024_irnt	PGM3	0.505686
rs144441243	0.00719646	-0.0895124	0.234008	100150	PGM3	0.505686
rs144441243	0.00770351	0.116141	0.022561	1001	PGM3	0.505686
rs144441243	0.00719646	0.005371	0.755958	100240	PGM3	0.505686
rs144441243	0.00719646	-0.0301834	0.688189	100250	PGM3	0.505686
rs144441243	0.00719646	0.0453696	0.324383	100270	PGM3	0.505686
rs144441243	0.00719646	0.04887	0.057772	100280	PGM3	0.505686
rs144441243	0.00719646	-0.0310766	0.277376	100370	PGM3	0.505686
rs144441243	0.00719646	0.021452	0.159947	100390	PGM3	0.505686
rs144441243	0.00719646	-3.23143	0.609546	100400	PGM3	0.505686
rs144441243	0.00719646	0.0404395	0.263747	100460	PGM3	0.505686
rs144441243	0.00718919	0.0182949	0.282514	100520	PGM3	0.505686
rs144441243	0.00719646	-0.0257439	0.173484	100580	PGM3	0.505686
rs144441243	0.00719646	-0.00985347	0.600371	100630	PGM3	0.505686
rs144441243	0.00719646	-0.00748807	0.854238	100670	PGM3	0.505686
rs144441243	0.00719646	0.0209664	0.612706	100710	PGM3	0.505686
rs144441243	0.00753191	0.0328488	0.212861	1011	PGM3	0.505686
rs144441243	0.00719646	-0.00238118	0.893769	102130	PGM3	0.505686
rs144441243	0.00754024	0.0324615	0.278103	1021	PGM3	0.505686
rs144441243	0.00719646	0.044902	0.103567	102330	PGM3	0.505686
rs144441243	0.00719646	-0.0665289	0.299417	102360	PGM3	0.505686
rs144441243	0.00719646	0.0120758	0.506812	102400	PGM3	0.505686
rs144441243	0.00719646	-0.0109957	0.562153	102800	PGM3	0.505686
rs144441243	0.00719716	0.0105141	0.303035	102840	PGM3	0.505686
rs144441243	0.00750091	-0.010457	0.470082	102_irnt	PGM3	0.505686
rs144441243	0.00719716	-0.0113127	0.702715	103020	PGM3	0.505686
rs144441243	0.00751818	-0.00293187	0.850929	1031	PGM3	0.505686
rs144441243	0.00719646	-0.000495034	0.943784	103250	PGM3	0.505686
rs144441243	0.00719646	-0.00584973	0.685653	103990	PGM3	0.505686
rs144441243	0.00719646	-0.017141	0.668685	104450	PGM3	0.505686
rs144441243	0.00719646	-0.0156182	0.700166	104460	PGM3	0.505686
rs144441243	0.00719646	-0.64606	0.845192	104920	PGM3	0.505686
rs144441243	0.00747922	0.0125427	0.329862	1050	PGM3	0.505686
rs144441243	0.00747894	0.0135621	0.127585	1060	PGM3	0.505686
rs144441243	0.00749504	-0.0128106	0.231309	1070	PGM3	0.505686
rs144441243	0.00750042	0.00302529	0.806913	1080	PGM3	0.505686
rs144441243	0.00751507	0.0136891	0.27431	1090	PGM3	0.505686
rs144441243	0.00749717	-0.0163336	0.33492	110001	PGM3	0.505686
rs144441243	0.00745025	0.0127721	0.270374	1100	PGM3	0.505686
rs144441243	0.00750811	-0.00119149	0.949659	1110	PGM3	0.505686
rs144441243	0.0075532	0.0172514	0.367776	1120	PGM3	0.505686
rs144441243	0.00755739	0.0154716	0.222515	1130	PGM3	0.505686
rs144441243	0.00751367	-0.00392173	0.690887	1140	PGM3	0.505686
rs144441243	0.0075452	0.00923446	0.209053	1150_1	PGM3	0.505686
rs144441243	0.0075452	-0.00593086	0.434385	1150_2	PGM3	0.505686
rs144441243	0.00751582	-0.00308633	0.775322	1160	PGM3	0.505686
rs144441243	0.00751278	0.0214258	0.0437826	1170	PGM3	0.505686
rs144441243	0.00752232	-0.0181375	0.189836	1180	PGM3	0.505686
rs144441243	0.0075015	-0.0111728	0.106681	1210	PGM3	0.505686
rs144441243	0.00777226	-0.147972	0.0610718	12336_irnt	PGM3	0.505686
rs144441243	0.0077737	0.0141591	0.847845	12340_irnt	PGM3	0.505686
rs144441243	0.00751606	0.016098	0.376311	1249	PGM3	0.505686
rs144441243	0.00751783	-0.0120579	0.161546	1279	PGM3	0.505686
rs144441243	0.00752081	0.000151138	0.988501	1289	PGM3	0.505686
rs144441243	0.00751385	-0.0209282	0.0312779	1299	PGM3	0.505686
rs144441243	0.00756834	0.0185172	0.097279	129_irnt	PGM3	0.505686
rs144441243	0.00751644	-0.00409183	0.621028	1309	PGM3	0.505686
rs144441243	0.00756834	-0.0287235	0.0232953	130_irnt	PGM3	0.505686
rs144441243	0.00745481	-0.011026	0.329865	1319	PGM3	0.505686
rs144441243	0.0075104	-0.00335232	0.793824	1329	PGM3	0.505686
rs144441243	0.00751716	-0.0018362	0.866781	1339	PGM3	0.505686
rs144441243	0.0075181	0.00409738	0.7725	1349	PGM3	0.505686
rs144441243	0.00750961	-0.00273572	0.531169	134	PGM3	0.505686
rs144441243	0.0075102	0.0124408	0.311318	1359	PGM3	0.505686
rs144441243	0.00751647	0.0201593	0.0813437	1369	PGM3	0.505686
rs144441243	0.00750632	0.00206852	0.833516	1379	PGM3	0.505686
rs144441243	0.0075125	0.00550523	0.579329	1389	PGM3	0.505686
rs144441243	0.00748988	0.00696717	0.645987	1408	PGM3	0.505686
rs144441243	0.0075184	-0.00012094	0.971881	1418_1	PGM3	0.505686
rs144441243	0.0075184	-0.00189219	0.738508	1418_3	PGM3	0.505686
rs144441243	0.0075184	0.00118296	0.654071	1418_4	PGM3	0.505686
rs144441243	0.0075184	-0.0015191	0.541756	1418_6	PGM3	0.505686
rs144441243	0.00751146	-0.00133928	0.753176	1428_0	PGM3	0.505686
rs144441243	0.00751146	-0.00209867	0.757141	1428_1	PGM3	0.505686
rs144441243	0.00751146	-0.000667055	0.517919	1428_2	PGM3	0.505686
rs144441243	0.00751146	0.00410501	0.558768	1428_3	PGM3	0.505686
rs144441243	0.00753884	-0.00664871	0.623442	1438_irnt	PGM3	0.505686
rs144441243	0.00751936	0.0053616	0.390516	1448_1	PGM3	0.505686
rs144441243	0.00751936	-0.00436562	0.534262	1448_3	PGM3	0.505686
rs144441243	0.00751936	-0.00079576	0.780758	1448_4	PGM3	0.505686
rs144441243	0.00751824	0.00859129	0.475296	1458	PGM3	0.505686
rs144441243	0.00754122	-0.00285128	0.622334	1468_1	PGM3	0.505686
rs144441243	0.00754122	0.00636131	0.281185	1468_2	PGM3	0.505686
rs144441243	0.00754122	0.00270867	0.685366	1468_3	PGM3	0.505686
rs144441243	0.00754122	-0.0019584	0.753045	1468_4	PGM3	0.505686
rs144441243	0.00754122	-0.0042603	0.483152	1468_5	PGM3	0.505686
rs144441243	0.00751532	-0.000183052	0.987801	1478	PGM3	0.505686
rs144441243	0.00752678	-0.0157388	0.271087	1488_irnt	PGM3	0.505686
rs144441243	0.00754136	-0.00542665	0.619989	1498	PGM3	0.505686
rs144441243	0.00748193	0.00299686	0.633709	1508_1	PGM3	0.505686
rs144441243	0.00748193	0.00685617	0.385146	1508_2	PGM3	0.505686
rs144441243	0.00748193	-0.0107635	0.107188	1508_3	PGM3	0.505686
rs144441243	0.00750075	-0.0142274	0.0776143	1518	PGM3	0.505686
rs144441243	0.00747027	-0.0215219	0.0815385	1528	PGM3	0.505686
rs144441243	0.00751668	0.00775739	0.258709	1538_0	PGM3	0.505686
rs144441243	0.00751668	-0.00148273	0.732104	1538_1	PGM3	0.505686
rs144441243	0.00751668	-0.00627467	0.32111	1538_2	PGM3	0.505686
rs144441243	0.00751347	-0.0199305	0.333335	1558	PGM3	0.505686
rs144441243	0.00750358	-0.00186452	0.893649	1568	PGM3	0.505686
rs144441243	0.00750667	0.00355147	0.801868	1578	PGM3	0.505686
rs144441243	0.00751608	-0.0016003	0.888696	1588	PGM3	0.505686
rs144441243	0.00750102	-0.00483843	0.742273	1598	PGM3	0.505686
[truncated: 550,308+ more rows]

## Sheet: Table S7
Supplementary Table 7. Genes with evidence of colocalization between GWAS of UKBB traits and 3'aQTL in any GTEx tissues.
[truncated: 102,384 more rows]

[truncated: 1 more sheets: Table S8]
